# Supplementary material for: Guanidine fuels rapid resurrection of desert cyanobacteria
Source: Research Square preprint supplement (doi:10.21203/rs.3.rs-8507520/v1), 2026-01-22
Supplement: Supplementary file 1 [file 20bf076f6c42c571af6177cf.xlsx]

## Sheet: Supplementary Table 1
Supplementary Table 1. List of differentially expressed genes during rehydration.
Locus Tag	Cluster	Replicas-1	Replicas-2	Replicas-3	Gene_name	Annotation	Function classification
COO91_09075	cluster1	cluster1	cluster1	cluster1	ABC.FEV.S	iron complex transport system substrate-binding protein	ABC transporters
COO91_08847	cluster1	cluster1	cluster1	cluster1	rbsA	ribose transport system ATP-binding protein [EC:3.6.3.17]	ABC transporters
COO91_08845	cluster1	cluster1	cluster1	cluster1	rbsC	ribose transport system permease protein	ABC transporters
COO91_04831	cluster1	cluster1	cluster1	cluster1	ASPA	aspartoacylase [EC:3.5.1.15]	Alanine, aspartate and glutamate metabolism
COO91_01507	cluster1	cluster1	cluster1	cluster1	putA	RHH-type transcriptional regulator, proline utilization regulon repressor / proline dehydrogenase / delta 1-pyrroline-5-carboxylate dehydrogenase [EC:1.5.5.2 1.2.1.88]	Alanine, aspartate and glutamate metabolism
COO91_03020	cluster1	cluster1	cluster1	cluster1	marC	multiple antibiotic resistance protein	Amino acid transport and metabolism
COO91_06575	cluster1	cluster1	cluster1	cluster1	none	Lysophospholipase L1 or related esterase	Amino acid transport and metabolism
COO91_07524	cluster1	cluster1	cluster1	cluster1	none	Xaa-Pro aminopeptidase	Amino acid transport and metabolism
COO91_02119	cluster1	cluster1	cluster1	cluster1	none	D-alanine-D-alanine ligase and related ATP-grasp enzymes	Amino acid transport and metabolism
COO91_05280	cluster1	cluster1	cluster1	cluster1	none	Saccharopine dehydrogenase%2C NADP-dependent	Amino acid transport and metabolism
COO91_11262	cluster1	cluster1	cluster1	cluster1	none	Glycine/D-amino acid oxidase	Amino acid transport and metabolism
COO91_03201	cluster1	cluster1	cluster1	cluster1	-	fatty aldehyde-generating acyl-ACP reductase [EC:1.2.1.80]	Amino Acids and Derivatives
COO91_07552	cluster1	cluster1	cluster1	cluster1	ABC.CD.A	putative ABC transport system ATP-binding protein	Amino Acids and Derivatives
COO91_05429	cluster1	cluster1	cluster1	cluster1	cphA	cyanophycin synthetase	Amino Acids and Derivatives
COO91_01828	cluster1	cluster1	cluster1	cluster1	cphB_1	cyanophycinase [EC:3.4.15.6]	Amino Acids and Derivatives
COO91_05427	cluster1	cluster1	cluster1	cluster1	cphB2	cyanophycinase	Amino Acids and Derivatives
COO91_07290	cluster1	cluster1	cluster1	cluster1	none	Threonine dehydrogenase or related Zn-dependent dehydrogenase	Amino Acids and Derivatives
COO91_05705	cluster1	cluster1	cluster1	cluster1	none	Arginine/lysine/ornithine decarboxylase	Amino Acids and Derivatives
COO91_02603	cluster1	cluster1	cluster1	cluster1	none	Cystathionine beta-lyase	Amino Acids and Derivatives
COO91_07288	cluster1	cluster1	cluster1	cluster1	none	Threonine dehydrogenase or related Zn-dependent dehydrogenase	Amino Acids and Derivatives
COO91_00338	cluster1	cluster1	cluster1	cluster1	none	Cystathionine beta-lyase	Amino Acids and Derivatives
COO91_03896	cluster1	cluster1	cluster1	cluster1	SQD1	UDP-sulfoquinovose synthase [EC:3.13.1.1]	Amino sugar and nucleotide sugar metabolism
COO91_04256	cluster1	cluster1	cluster1	cluster1	argS	arginyl-tRNA synthetase [EC:6.1.1.19]	Aminoacyl-tRNA biosynthesis
COO91_10009	cluster1	cluster1	cluster1	cluster1	gatA	aspartyl-tRNA(Asn)/glutamyl-tRNA(Gln) amidotransferase subunit A [EC:6.3.5.6 6.3.5.7]	Aminoacyl-tRNA biosynthesis
COO91_03278	cluster1	cluster1	cluster1	cluster1	gatC	aspartyl-tRNA(Asn)/glutamyl-tRNA(Gln) amidotransferase subunit C [EC:6.3.5.6 6.3.5.7]	Aminoacyl-tRNA biosynthesis
COO91_04931	cluster1	cluster1	cluster1	cluster1	MARS	methionyl-tRNA synthetase [EC:6.1.1.10]	Aminoacyl-tRNA biosynthesis
COO91_06982	cluster1	cluster1	cluster1	cluster1	proA	glutamate-5-semialdehyde dehydrogenase [EC:1.2.1.41]	Arginine and proline metabolism
COO91_07229	cluster1	cluster1	cluster1	cluster1	speA	arginine decarboxylase	Arginine and proline metabolism
COO91_07618	cluster1	cluster1	cluster1	cluster1	cheC	chemotaxis protein CheC	Bacterial chemotaxis
COO91_04376	cluster1	cluster1	cluster1	cluster1	desC	delta-9 desaturase	Biosynthesis of unsaturated fatty acids
COO91_07296	cluster1	cluster1	cluster1	cluster1	desC	delta-9 desaturase	Biosynthesis of unsaturated fatty acids
COO91_08859	cluster1	cluster1	cluster1	cluster1	SCD	stearoyl-CoA desaturase (Delta-9 desaturase) [EC:1.14.19.1]	Biosynthesis of unsaturated fatty acids
COO91_10321	cluster1	cluster1	cluster1	cluster1	SCD	stearoyl-CoA desaturase (Delta-9 desaturase) [EC:1.14.19.1]	Biosynthesis of unsaturated fatty acids
COO91_11263	cluster1	cluster1	cluster1	cluster1	SCD	stearoyl-CoA desaturase (Delta-9 desaturase) [EC:1.14.19.1]	Biosynthesis of unsaturated fatty acids
COO91_02511	cluster1	cluster1	cluster1	cluster1	ilvN	acetolactate synthase	Butanoate metabolism
COO91_02129	cluster1	cluster1	cluster1	cluster1	phbC	polyhydroxyalkanoate synthase [EC:2.3.1.-]	Butanoate metabolism
COO91_00521	cluster1	cluster1	cluster1	cluster1	IRPC	inward rectifier potassium channel	Carbohydrate transport and metabolism
COO91_01604	cluster1	cluster1	cluster1	cluster1	none	Broad specificity phosphatase PhoE	Carbohydrate transport and metabolism
COO91_02274	cluster1	cluster1	cluster1	cluster1	none	Na+/melibiose symporter or related transporter	Carbohydrate transport and metabolism
COO91_05098	cluster1	cluster1	cluster1	cluster1	none	putative arabinose efflux permease%2C MFS family	Carbohydrate transport and metabolism
COO91_07509	cluster1	cluster1	cluster1	cluster1	none	Glucose/arabinose dehydrogenase%2C beta-propeller fold	Carbohydrate transport and metabolism
COO91_06958	cluster1	cluster1	cluster1	cluster1	none	Na+/melibiose symporter or related transporter	Carbohydrate transport and metabolism
COO91_02121	cluster1	cluster1	cluster1	cluster1	none	Na+/melibiose symporter or related transporter	Carbohydrate transport and metabolism
COO91_10096	cluster1	cluster1	cluster1	cluster1	none	Mannose-6-phosphate isomerase%2C cupin superfamily	Carbohydrate transport and metabolism
COO91_00224	cluster1	cluster1	cluster1	cluster1	none	Glucoamylase	Carbohydrate transport and metabolism
COO91_05256	cluster1	cluster1	cluster1	cluster1	none	putative arabinose efflux permease%2C MFS family	Carbohydrate transport and metabolism
COO91_06449	cluster1	cluster1	cluster1	cluster1	none	Glucose/arabinose dehydrogenase%2C beta-propeller fold	Carbohydrate transport and metabolism
COO91_05496	cluster1	cluster1	cluster1	cluster1	none	Glucose/arabinose dehydrogenase%2C beta-propeller fold	Carbohydrate transport and metabolism
COO91_00696	cluster1	cluster1	cluster1	cluster2	none	Mannose-6-phosphate isomerase%2C cupin superfamily	Carbohydrate transport and metabolism
COO91_01210	cluster1	cluster1	cluster1	cluster1	E4.1.1.74	indolepyruvate decarboxylase [EC:4.1.1.74]	Carbohydrates
COO91_07282	cluster1	cluster1	cluster1	cluster1	HCP1	Phosphoenolpyruvate carboxylase (EC 4.1.1.31)	Carbohydrates
COO91_08671	cluster1	cluster1	cluster1	cluster1	HCP2	Phosphoenolpyruvate carboxylase (EC 4.1.1.31)	Carbohydrates
COO91_03953	cluster1	cluster1	cluster1	cluster1	kojP	kojibiose phosphorylase [EC:2.4.1.230]	Carbohydrates
COO91_05089	cluster1	cluster1	cluster1	cluster1	none	Uncaracterized surface protein containing fasciclin	Carbohydrates
COO91_05087	cluster1	cluster1	cluster1	cluster1	none	Glycosidase	Carbohydrates
COO91_07034	cluster1	cluster1	cluster1	cluster1	none	Expressed protein involved in photorespiration	Carbohydrates
COO91_02835	cluster1	cluster1	cluster1	cluster1	none	Beta-phosphoglucomutase or related phosphatase%2C HAD superfamily	Carbohydrates
COO91_04036	cluster1	cluster1	cluster1	cluster1	none	hypothetical protein	Carbohydrates
COO91_07576	cluster1	cluster1	cluster1	cluster1	none	Sugar or nucleoside kinase%2C ribokinase family	Carbohydrates
COO91_07465	cluster1	cluster1	cluster1	cluster1	none	Phosphomannomutase	Carbohydrates
COO91_08734	cluster1	cluster1	cluster1	cluster1	none	Acetolactate synthase large subunit or other thiamine pyrophosphate-requiring enzyme	Carbohydrates
COO91_08843	cluster1	cluster1	cluster1	cluster1	none	MFS family permease	Carbohydrates
COO91_04290	cluster1	cluster1	cluster1	cluster1	opcA	putative OxPPCycle protein OpcA	Carbohydrates
COO91_05771	cluster1	cluster1	cluster1	cluster1	crtW	beta-carotene ketolase (CrtW type)	Carotenoid biosynthesis
COO91_02367	cluster1	cluster1	cluster1	cluster1	clpP	ATP-dependent Clp protease, protease subunit [EC:3.4.21.92]	Cell cycle
COO91_04521	cluster1	cluster1	cluster1	cluster1	lon	ATP-dependent Lon protease [EC:3.4.21.53]	Cell cycle
COO91_03499	cluster1	cluster1	cluster1	cluster1	none	N-methylhydantoinase B/oxoprolinase/acetone carboxylase%2C alpha subunit	Cell cycle control, cell division, chromosome partitioning
COO91_03891	cluster1	cluster1	cluster1	cluster1	none	AAA+-type ATPase%2C SpoVK/Ycf46/Vps4 family	Cell cycle control, cell division, chromosome partitioning
COO91_04631	cluster1	cluster1	cluster1	cluster1	none	Chromosome segregation ATPase	Cell cycle control, cell division, chromosome partitioning
COO91_03977	cluster1	cluster1	cluster1	cluster1	none	Chromosome segregation ATPase	Cell cycle control, cell division, chromosome partitioning
COO91_07097	cluster1	cluster1	cluster1	cluster2	none	hypothetical protein	Cell cycle control, cell division, chromosome partitioning
COO91_05337	cluster1	cluster1	cluster1	cluster1	minC	septum site-determining protein	Cell Division and Cell Cycle
COO91_00223	cluster1	cluster1	cluster1	cluster1	none	Glycosyltransferase%2C catalytic subunit of cellulose synthase and poly-beta-1%2C6-N-acetylglucosamine synthase	Cell motility
COO91_01893	cluster1	cluster1	cluster1	cluster1	none	hypothetical protein	Cell motility
COO91_07785	cluster1	cluster1	cluster1	cluster1	none	hypothetical protein	Cell motility
COO91_10520	cluster1	cluster1	cluster1	cluster1	none	hypothetical protein	Cell motility
COO91_10710	cluster1	cluster1	cluster1	cluster1	none	hypothetical protein	Cell motility
COO91_07512	cluster1	cluster1	cluster1	cluster1	rfbD	dTDP-4-dehydrorhamnose reductase [EC:1.1.1.133]	Cell Wall and Capsule
COO91_02595	cluster1	cluster1	cluster1	cluster1	ABC.CD.A	putative ABC transport system ATP-binding protein	Cell wall/membrane/envelope biogenesis
COO91_04829	cluster1	cluster1	cluster1	cluster1	none	N-acetylneuraminic acid mutarotase	Cell wall/membrane/envelope biogenesis
COO91_00258	cluster1	cluster1	cluster1	cluster1	none	Glycosyltransferase involved in cell wall bisynthesis	Cell wall/membrane/envelope biogenesis
COO91_08842	cluster1	cluster1	cluster1	cluster1	none	Carbohydrate-selective porin OprB	Cell wall/membrane/envelope biogenesis
COO91_00407	cluster1	cluster1	cluster1	cluster1	none	Glycosyltransferase involved in cell wall bisynthesis	Cell wall/membrane/envelope biogenesis
COO91_06308	cluster1	cluster1	cluster1	cluster1	none	Glycosyltransferase involved in cell wall bisynthesis	Cell wall/membrane/envelope biogenesis
COO91_07588	cluster1	cluster1	cluster1	cluster1	none	Protein of unknown function DUF3352	Cell wall/membrane/envelope biogenesis
COO91_02861	cluster1	cluster1	cluster1	cluster1	none	Type V secretory pathway%2C adhesin AidA	Cell wall/membrane/envelope biogenesis
COO91_03112	cluster1	cluster1	cluster1	cluster1	spsB	sucrose-phosphate synthase	Cell wall/membrane/envelope biogenesis
COO91_03897	cluster1	cluster1	cluster1	cluster1	sqdX	sulfolipid sulfoquinovosyldiacylglycerol biosynthesis protein	Cell wall/membrane/envelope biogenesis
COO91_05179	cluster1	cluster1	cluster1	cluster1	flA	adenosyl-fluoride synthase [EC:2.5.1.63]	Coenzyme transport and metabolism
COO91_02125	cluster1	cluster1	cluster1	cluster1	HLIP_1	Protoheme ferro-lyase (ferrochelatase)	Coenzyme transport and metabolism
COO91_11256	cluster1	cluster1	cluster1	cluster1	HLIP_12	Protoheme ferro-lyase (ferrochelatase)	Coenzyme transport and metabolism
COO91_05265	cluster1	cluster1	cluster1	cluster1	none	Phosphoribosylaminoimidazole carboxylase	Coenzyme transport and metabolism
COO91_02132	cluster1	cluster1	cluster1	cluster1	none	Lysophospholipase%2C alpha-beta hydrolase superfamily	Coenzyme transport and metabolism
COO91_05011	cluster1	cluster1	cluster1	cluster1	none	Pimeloyl-ACP methyl ester carboxylesterase	Coenzyme transport and metabolism
COO91_03548	cluster1	cluster1	cluster1	cluster1	none	Putative GTP cyclohydrolase 1 type 2%2C NIF3 family	Coenzyme transport and metabolism
COO91_09258	cluster1	cluster1	cluster1	cluster1	none	Pimeloyl-ACP methyl ester carboxylesterase	Coenzyme transport and metabolism
COO91_00363	cluster1	cluster1	cluster1	cluster1	ftsH	cell division protein	Cofactors, Vitamins, Prosthetic Groups, Pigments
COO91_01719	cluster1	cluster1	cluster1	cluster1	lplA	lipoate---protein ligase [EC:6.3.1.20]	Cofactors, Vitamins, Prosthetic Groups, Pigments
COO91_08624	cluster1	cluster1	cluster1	cluster1	none	hypothetical protein	Cofactors, Vitamins, Prosthetic Groups, Pigments
COO91_08801	cluster1	cluster1	cluster1	cluster1	none	putative unusual protein kinase regulating ubiqui biosynthesis%2C AarF/ABC1/UbiB family	Cofactors, Vitamins, Prosthetic Groups, Pigments
COO91_08054	cluster1	cluster1	cluster1	cluster1	none	hypothetical protein	Cofactors, Vitamins, Prosthetic Groups, Pigments
COO91_07592	cluster1	cluster1	cluster1	cluster1	none	Pyridoxamine 5'-phosphate oxidase%2C putative FMN-dependent%2C Alr4036 family	Cofactors, Vitamins, Prosthetic Groups, Pigments
COO91_11012	cluster1	cluster1	cluster1	cluster1	none	Ca2+-binding protein%2C RTX toxin-related	Cofactors, Vitamins, Prosthetic Groups, Pigments
COO91_06970	cluster1	cluster1	cluster1	cluster1	none	putative unusual protein kinase regulating ubiqui biosynthesis%2C AarF/ABC1/UbiB family	Cofactors, Vitamins, Prosthetic Groups, Pigments
COO91_11011	cluster1	cluster1	cluster1	cluster1	none	Alkaline phosphatase	Cofactors, Vitamins, Prosthetic Groups, Pigments
COO91_08732	cluster1	cluster1	cluster1	cluster1	none	General stress protein 26	Cofactors, Vitamins, Prosthetic Groups, Pigments
COO91_05426	cluster1	cluster1	cluster1	cluster1	none	Conserved hypothetical protein CHP02464	Cofactors, Vitamins, Prosthetic Groups, Pigments
COO91_02761	cluster1	cluster1	cluster1	cluster1	yahK	uncharacterized zinc-type alcohol dehydrogenase-like protein [EC:1.-.-.-]	Cofactors, Vitamins, Prosthetic Groups, Pigments
COO91_07551	cluster1	cluster1	cluster1	cluster1	ABC.CD.P	putative ABC transport system permease protein	Defense mechanisms
COO91_02594	cluster1	cluster1	cluster1	cluster1	ABC.CD.P	putative ABC transport system permease protein	Defense mechanisms
COO91_07549	cluster1	cluster1	cluster1	cluster1	ABC.CD.TX	HlyD family secretion protein	Defense mechanisms
COO91_02593	cluster1	cluster1	cluster1	cluster1	ABC.CD.TX	HlyD family secretion protein	Defense mechanisms
COO91_05707	cluster1	cluster1	cluster1	cluster1	ABC-2.P	ABC-2 type transport system permease protein	Defense mechanisms
COO91_04825	cluster1	cluster1	cluster1	cluster1	ABCB-BAC	ATP-binding cassette, subfamily B, bacterial	Defense mechanisms
COO91_05192	cluster1	cluster1	cluster1	cluster1	emrA	membrane fusion protein, multidrug efflux system	Defense mechanisms
COO91_04935	cluster1	cluster1	cluster1	cluster1	mazF	mRNA interferase MazF [EC:3.1.-.-]	Defense mechanisms
COO91_06770	cluster1	cluster1	cluster1	cluster1	none	putative nuclease of the RNAse H fold%2C HicB family	Defense mechanisms
COO91_04245	cluster1	cluster1	cluster1	cluster1	none	hypothetical protein	Defense mechanisms
COO91_10172	cluster1	cluster1	cluster1	cluster2	none	ABC-type bacteriocin/lantibiotic exporters%2C containing an N-terminal double-glycine peptidase domain	Defense mechanisms
COO91_05576	cluster1	cluster1	cluster1	cluster4	none	5-methylcytosine-specific restriction endonuclease McrA	Defense mechanisms
COO91_09803	cluster1	cluster1	cluster1	cluster1	none	Site-specific DNA-cytosine methylase	DNA Metabolism
COO91_10814	cluster1	cluster1	cluster1	cluster1	none	DNA-cytosine methyltransferase	DNA Metabolism
COO91_09801	cluster1	cluster1	cluster1	cluster1	none	Site-specific DNA-cytosine methylase	DNA Metabolism
COO91_09800	cluster1	cluster1	cluster1	cluster1	none	Site-specific DNA-cytosine methylase	DNA Metabolism
COO91_00345	cluster1	cluster1	cluster1	cluster1	phrB	deoxyribodipyrimidine photo-lyase [EC:4.1.99.3]	DNA Metabolism
COO91_09802	cluster1	cluster1	cluster1	cluster2	none	Site-specific DNA-cytosine methylase	DNA Metabolism
COO91_00592	cluster1	cluster1	cluster1	cluster1	E6.5.1.2	DNA ligase (NAD+) [EC:6.5.1.2]	DNA replication
COO91_05722	cluster1	cluster1	cluster1	cluster1	none	Epimerase family protein SDR39U1	Dormancy and Sporulation
COO91_00304	cluster1	cluster1	cluster1	cluster1	none	NADP-dependent 3-hydroxy acid dehydrogenase YdfG	Energy production and conversion
COO91_00232	cluster1	cluster1	cluster1	cluster1	none	Phosphoglycolate phosphatase%2C HAD superfamily	Energy production and conversion
COO91_00231	cluster1	cluster1	cluster1	cluster1	none	NADP-dependent 3-hydroxy acid dehydrogenase YdfG	Energy production and conversion
COO91_00949	cluster1	cluster1	cluster1	cluster1	none	Polyphosphate kinase 2%2C PPK2 family	Energy production and conversion
COO91_07369	cluster1	cluster1	cluster1	cluster1	none	Periplasmic DMSO/TMAO reductase YedYZ%2C molybdopterin-dependent catalytic subunit	Energy production and conversion
COO91_08860	cluster1	cluster1	cluster1	cluster1	-	putative membrane protein	Fatty Acids, Lipids, and Isoprenoids
COO91_02131	cluster1	cluster1	cluster1	cluster1	fabG	3-oxoacyl-[acyl-carrier protein] reductase [EC:1.1.1.100]	Fatty Acids, Lipids, and Isoprenoids
COO91_00214	cluster1	cluster1	cluster1	cluster1	none	Radical SAM superfamily enzyme YgiQ%2C UPF0313 family	Fatty Acids, Lipids, and Isoprenoids
COO91_02123	cluster1	cluster1	cluster1	cluster1	none	Phytoene dehydrogenase-related protein	Fatty Acids, Lipids, and Isoprenoids
COO91_03928	cluster1	cluster1	cluster1	cluster1	none	Phytoene dehydrogenase-related protein	Fatty Acids, Lipids, and Isoprenoids
COO91_08906	cluster1	cluster1	cluster1	cluster1	folK	2-amino-4-hydroxy-6-hydroxymethyldihydropteridine diphosphokinase [EC:2.7.6.3]	Folate biosynthesis
COO91_05099	cluster1	cluster1	cluster1	cluster1	moaC	molybdenum cofactor biosynthesis protein C	Folate biosynthesis
COO91_04236	cluster1	cluster1	cluster1	cluster1	moaE	molybdopterin converting factor, subunit 2	Folate biosynthesis
COO91_06379	cluster1	cluster1	cluster1	cluster1	queD	6-pyruvoyltetrahydropterin/6-carboxytetrahydropterin synthase [EC:4.2.3.12 4.1.2.50]	Folate biosynthesis
COO91_06760	cluster1	cluster1	cluster1	cluster1	-	mannose-1-phosphate guanylyltransferase / phosphomannomutase [EC:2.7.7.13 5.4.2.8]	Fructose and mannose metabolism
COO91_06450	cluster1	cluster1	cluster1	cluster1	manA	mannose-6-phosphate isomerase [EC:5.3.1.8]	Fructose and mannose metabolism
COO91_03489	cluster1	cluster1	cluster1	cluster1	-	membrane protein	Function unknown
COO91_07515	cluster1	cluster1	cluster1	cluster1	-	putative membrane protein	Function unknown
COO91_02611	cluster1	cluster1	cluster1	cluster1	-	putative membrane protein	Function unknown
COO91_00524	cluster1	cluster1	cluster1	cluster1	anaKa	akinete-marker protein, AnAKa	Function unknown
COO91_00525	cluster1	cluster1	cluster1	cluster1	anaKc	AnAKc, homolog of akinete-marker protein	Function unknown
COO91_04930	cluster1	cluster1	cluster1	cluster1	none	hypothetical protein	Function unknown
COO91_02078	cluster1	cluster1	cluster1	cluster1	none	Serine/threonine protein kinase	Function unknown
COO91_11254	cluster1	cluster1	cluster1	cluster1	none	putative membrane protein	Function unknown
COO91_03833	cluster1	cluster1	cluster1	cluster1	none	hypothetical protein	Function unknown
COO91_05014	cluster1	cluster1	cluster1	cluster1	none	putative lipoprotein YddW%2C UPF0748 family	Function unknown
COO91_04247	cluster1	cluster1	cluster1	cluster1	none	putative protein YjbI%2C containings pentapeptide repeats	Function unknown
COO91_03064	cluster1	cluster1	cluster1	cluster1	none	putative membrane protein	Function unknown
COO91_05010	cluster1	cluster1	cluster1	cluster1	none	putative protein YjbI%2C containings pentapeptide repeats	Function unknown
COO91_07494	cluster1	cluster1	cluster1	cluster1	none	putative membrane protein	Function unknown
COO91_05314	cluster1	cluster1	cluster1	cluster1	none	hypothetical protein	Function unknown
COO91_05539	cluster1	cluster1	cluster1	cluster1	none	hypothetical protein	Function unknown
COO91_03062	cluster1	cluster1	cluster1	cluster1	none	hypothetical protein	Function unknown
COO91_06744	cluster1	cluster1	cluster1	cluster1	none	putative membrane protein	Function unknown
COO91_05007	cluster1	cluster1	cluster1	cluster1	none	hypothetical protein	Function unknown
COO91_03490	cluster1	cluster1	cluster1	cluster1	none	putative membrane protein YcaP%2C DUF421 family	Function unknown
COO91_03958	cluster1	cluster1	cluster1	cluster1	none	putative membrane protein	Function unknown
COO91_02120	cluster1	cluster1	cluster1	cluster1	none	hypothetical protein	Function unknown
COO91_02708	cluster1	cluster1	cluster1	cluster1	none	Uridine phosphorylase	Function unknown
COO91_04936	cluster1	cluster1	cluster1	cluster1	none	hypothetical protein	Function unknown
COO91_03282	cluster1	cluster1	cluster1	cluster1	none	Protein of unknown function DUF167	Function unknown
COO91_02683	cluster1	cluster1	cluster1	cluster1	none	putative membrane protein YkvA%2C DUF1232 family	Function unknown
COO91_07287	cluster1	cluster1	cluster1	cluster1	none	putative membrane protein	Function unknown
COO91_03284	cluster1	cluster1	cluster1	cluster1	none	putative membrane protein	Function unknown
COO91_10563	cluster1	cluster1	cluster1	cluster1	none	Exopolysaccharide synthesis%2C ExoD	Function unknown
COO91_07285	cluster1	cluster1	cluster1	cluster1	none	hypothetical protein	Function unknown
COO91_01658	cluster1	cluster1	cluster1	cluster1	none	putative protein%2C Rmd1/YagE family	Function unknown
COO91_06278	cluster1	cluster1	cluster1	cluster1	none	hypothetical protein	Function unknown
COO91_08725	cluster1	cluster1	cluster1	cluster1	none	putative membrane protein HdeD%2C DUF308 family	Function unknown
COO91_05684	cluster1	cluster1	cluster1	cluster1	none	hypothetical protein	Function unknown
COO91_02610	cluster1	cluster1	cluster1	cluster1	none	putative membrane protein YqaE	Function unknown
COO91_01705	cluster1	cluster1	cluster1	cluster1	none	Protein of unknown function DUF937	Function unknown
COO91_04629	cluster1	cluster1	cluster1	cluster1	none	Osmotically-inducible protein OsmY%2C containings BON domain	Function unknown
COO91_04630	cluster1	cluster1	cluster1	cluster1	none	Cation transport regulator ChaB	Function unknown
COO91_08723	cluster1	cluster1	cluster1	cluster1	none	putative lipoprotein YddW%2C UPF0748 family	Function unknown
COO91_02512	cluster1	cluster1	cluster1	cluster1	none	Osmotically-inducible protein OsmY%2C containings BON domain	Function unknown
COO91_04397	cluster1	cluster1	cluster1	cluster1	none	putative membrane protein	Function unknown
COO91_00523	cluster1	cluster1	cluster1	cluster1	none	Stress response protein YsnF	Function unknown
COO91_02690	cluster1	cluster1	cluster1	cluster1	none	putative protein YjbI%2C containings pentapeptide repeats	Function unknown
COO91_07573	cluster1	cluster1	cluster1	cluster1	none	putative membrane protein	Function unknown
COO91_04461	cluster1	cluster1	cluster1	cluster1	none	Protein of unknown function DUF1802	Function unknown
COO91_03296	cluster1	cluster1	cluster1	cluster1	none	putative membrane protein	Function unknown
COO91_05836	cluster1	cluster1	cluster1	cluster1	yidH	putative membrane protein	Function unknown
COO91_05743	cluster1	cluster1	cluster1	cluster4	-	MtN3 and saliva related transmembrane protein	Function unknown
COO91_05571	cluster1	cluster1	cluster1	cluster4	none	hypothetical protein	Function unknown
COO91_07511	cluster1	cluster1	cluster1	cluster1	galE	UDP-glucose 4-epimerase [EC:5.1.3.2]	Galactose metabolism
COO91_07525	cluster1	cluster1	cluster1	cluster1	galK	galactokinase [EC:2.7.1.6]	Galactose metabolism
COO91_07514	cluster1	cluster1	cluster1	cluster1	glf	UDP-galactopyranose mutase [EC:5.4.99.9]	Galactose metabolism
COO91_04184	cluster1	cluster1	cluster1	cluster1	malZ	alpha-glucosidase [EC:3.2.1.20]	Galactose metabolism
COO91_01619	cluster1	cluster1	cluster1	cluster1	HCP3	Ketosteroid isomerase-related protein	General function prediction only
COO91_07280	cluster1	cluster1	cluster1	cluster1	HCP6	Ketosteroid isomerase-related protein	General function prediction only
COO91_01741	cluster1	cluster1	cluster1	cluster1	none	Tetratricopeptide	General function prediction only
COO91_06263	cluster1	cluster1	cluster1	cluster1	none	Secreted protein containing bacterial Ig-like domain and vWFA domain	General function prediction only
COO91_07291	cluster1	cluster1	cluster1	cluster1	none	Cupin domain protein related to quercetin dioxygenase	General function prediction only
COO91_03314	cluster1	cluster1	cluster1	cluster1	none	putative nucleic-acid-binding protein%2C containings PIN domain	General function prediction only
COO91_02497	cluster1	cluster1	cluster1	cluster1	none	Radical SAM superfamily enzyme%2C MoaA/NifB/PqqE/SkfB family	General function prediction only
COO91_03785	cluster1	cluster1	cluster1	cluster1	none	EVE domain	General function prediction only
COO91_06060	cluster1	cluster1	cluster1	cluster1	none	hypothetical protein	General function prediction only
COO91_05681	cluster1	cluster1	cluster1	cluster1	none	putative nucleic acid-binding protein%2C containings PIN domain	General function prediction only
COO91_09017	cluster1	cluster1	cluster1	cluster1	none	Cupin domain protein related to quercetin dioxygenase	General function prediction only
COO91_08815	cluster1	cluster1	cluster1	cluster1	none	Tetratricopeptide	General function prediction only
COO91_00303	cluster1	cluster1	cluster1	cluster1	none	putative oxidoreductase	General function prediction only
COO91_05905	cluster1	cluster1	cluster1	cluster1	none	putative PurR-regulated permease PerM	General function prediction only
COO91_05008	cluster1	cluster1	cluster1	cluster1	none	Metallo-dependent phosphatase-like	General function prediction only
COO91_02467	cluster1	cluster1	cluster1	cluster1	none	putative oxidoreductase	General function prediction only
COO91_02955	cluster1	cluster1	cluster1	cluster1	none	Serine/threonine protein kinase	General function prediction only
COO91_04460	cluster1	cluster1	cluster1	cluster1	none	Archaeal DNA helicase HerA or a related bacterial ATPase%2C containings HAS-barrel and ATPase domains	General function prediction only
COO91_03343	cluster1	cluster1	cluster1	cluster1	none	putative SAM-binding protein YcdF%2C DUF218 family	General function prediction only
COO91_00796	cluster1	cluster1	cluster1	cluster1	none	putative nucleic acid-binding protein%2C containings PIN domain	General function prediction only
COO91_04640	cluster1	cluster1	cluster1	cluster1	none	Endonuclease%2C Uma2 family	General function prediction only
COO91_04839	cluster1	cluster1	cluster1	cluster1	none	PIN domain-like	General function prediction only
COO91_05845	cluster1	cluster1	cluster1	cluster1	none	putative thiol-disulfide oxidoreductase YuxK%2C DCC family	General function prediction only
COO91_00527	cluster1	cluster1	cluster1	cluster1	none	putative protein%2C containings caspase domain	General function prediction only
COO91_02484	cluster1	cluster1	cluster1	cluster1	none	RmlC-like jelly roll fold	General function prediction only
COO91_01633	cluster1	cluster1	cluster1	cluster1	none	Endonuclease%2C Uma2 family	General function prediction only
COO91_05233	cluster1	cluster1	cluster1	cluster1	none	Uncaracterized surface protein containing fasciclin	General function prediction only
COO91_02415	cluster1	cluster1	cluster1	cluster1	none	putative oxidoreductase	General function prediction only
COO91_04615	cluster1	cluster1	cluster1	cluster1	none	HEAT repeat	General function prediction only
COO91_07398	cluster1	cluster1	cluster1	cluster1	none	Short-chain dehydrogenase/reductase SDR	General function prediction only
COO91_01689	cluster1	cluster1	cluster1	cluster1	none	putative GTPase	General function prediction only
COO91_01606	cluster1	cluster1	cluster1	cluster1	none	hypothetical protein	General function prediction only
COO91_05062	cluster1	cluster1	cluster1	cluster1	none	putative kinase	General function prediction only
COO91_02697	cluster1	cluster1	cluster1	cluster1	none	putative dienelactone hydrolase	General function prediction only
COO91_00339	cluster1	cluster1	cluster1	cluster1	none	AbrB protein	General function prediction only
COO91_02098	cluster1	cluster1	cluster1	cluster1	none	hypothetical protein	General function prediction only
COO91_03810	cluster1	cluster1	cluster1	cluster1	none	Hemerythrin superfamily protein	General function prediction only
COO91_01706	cluster1	cluster1	cluster1	cluster1	none	putative flavin-nucleotide-binding protein%2C pyridoxine 5'-phosphate oxidase superfamily	General function prediction only
COO91_02122	cluster1	cluster1	cluster1	cluster1	none	putative P-loop ATPase%2C KAP-like	General function prediction only
COO91_01826	cluster1	cluster1	cluster1	cluster1	none	Cupin domain protein related to quercetin dioxygenase	General function prediction only
COO91_08726	cluster1	cluster1	cluster1	cluster1	none	putative dienelactone hydrolase	General function prediction only
COO91_00602	cluster1	cluster1	cluster1	cluster1	none	Cupin domain protein related to quercetin dioxygenase	General function prediction only
COO91_02133	cluster1	cluster1	cluster1	cluster1	none	Short-chain dehydrogenase	General function prediction only
COO91_05329	cluster1	cluster1	cluster1	cluster1	none	putative dehydrogenase	General function prediction only
COO91_05330	cluster1	cluster1	cluster1	cluster1	none	Hemerythrin superfamily protein	General function prediction only
COO91_09670	cluster1	cluster1	cluster1	cluster1	none	putative dehydrogenase	General function prediction only
COO91_03118	cluster1	cluster1	cluster1	cluster1	none	putative membrane protein YeaQ/YmgE%2C transglycosylase-associated protein family	General function prediction only
COO91_00228	cluster1	cluster1	cluster1	cluster1	none	putative esterase	General function prediction only
COO91_04848	cluster1	cluster1	cluster1	cluster1	none	putative membrane protein YeaQ/YmgE%2C transglycosylase-associated protein family	General function prediction only
COO91_01743	cluster1	cluster1	cluster1	cluster1	none	putative phosphoribosyltransferase	General function prediction only
COO91_04032	cluster1	cluster1	cluster1	cluster1	none	putative peptidase	General function prediction only
COO91_07574	cluster1	cluster1	cluster1	cluster1	none	putative membrane protein YeaQ/YmgE%2C transglycosylase-associated protein family	General function prediction only
COO91_04173	cluster1	cluster1	cluster1	cluster1	none	putative nucleic acid-binding protein%2C containings PIN domain	General function prediction only
COO91_05735	cluster1	cluster1	cluster1	cluster1	none	Endonuclease%2C Uma2 family	General function prediction only
COO91_04255	cluster1	cluster1	cluster1	cluster1	none	Endonuclease%2C Uma2 family	General function prediction only
COO91_05423	cluster1	cluster1	cluster1	cluster1	none	Tetratricopeptide	General function prediction only
COO91_05528	cluster1	cluster1	cluster1	cluster1	OCPX_2	Ketosteroid isomerase-related protein	General function prediction only
COO91_07286	cluster1	cluster1	cluster1	cluster1	pfpI	protease I [EC:3.2.-.-]	General function prediction only
COO91_04938	cluster1	cluster1	cluster1	cluster1	CARP	leucyl aminopeptidase [EC:3.4.11.1]	Glutathione metabolism
COO91_02263	cluster1	cluster1	cluster1	cluster1	GSR	glutathione reductase (NADPH) [EC:1.8.1.7]	Glutathione metabolism
COO91_06013	cluster1	cluster1	cluster1	cluster1	trpB	tryptophan synthase beta subunit	Glycine, serine and threonine metabolism
COO91_01605	cluster1	cluster1	cluster1	cluster1	glk	glucokinase [EC:2.7.1.2]	Glycolysis/Gluconeogenesis
COO91_04465	cluster1	cluster1	cluster1	cluster1	pgi	glucose-6-phosphate isomerase	Glycolysis/Gluconeogenesis
COO91_04212	cluster1	cluster1	cluster1	cluster1	hisIE	phosphoribosyl-ATP pyrophosphohydrolase / phosphoribosyl-AMP cyclohydrolase [EC:3.6.1.31 3.5.4.19]	Histidine metabolism
COO91_06633	cluster1	cluster1	cluster1	cluster1	recO	DNA repair protein RecO (recombination protein O)	Homologous recombination
COO91_03200	cluster1	cluster1	cluster1	cluster1	-	fatty aldehyde decarbonylase [EC:4.1.99.5]	Inorganic ion transport and metabolism
COO91_06942	cluster1	cluster1	cluster1	cluster1	chaA	Ca2+:H+ antiporter	Inorganic ion transport and metabolism
COO91_08735	cluster1	cluster1	cluster1	cluster1	chaB	cation transport regulator	Inorganic ion transport and metabolism
COO91_04213	cluster1	cluster1	cluster1	cluster1	chaB	cation transport regulator	Inorganic ion transport and metabolism
COO91_03065	cluster1	cluster1	cluster1	cluster1	chaB	cation transport regulator	Inorganic ion transport and metabolism
COO91_03117	cluster1	cluster1	cluster1	cluster1	katB	Mn-catalase	Inorganic ion transport and metabolism
COO91_04028	cluster1	cluster1	cluster1	cluster1	none	ABC-type Zn uptake system ZnuABC%2C Zn-binding component ZnuA	Inorganic ion transport and metabolism
COO91_02485	cluster1	cluster1	cluster1	cluster1	none	Tellurite resistance protein	Inorganic ion transport and metabolism
COO91_04026	cluster1	cluster1	cluster1	cluster1	none	ABC-type Mn2+/Zn2+ transport system%2C ATPase component	Inorganic ion transport and metabolism
COO91_06273	cluster1	cluster1	cluster1	cluster1	none	Cation transport regulator ChaB	Inorganic ion transport and metabolism
COO91_04025	cluster1	cluster1	cluster1	cluster1	none	ABC-type Mn2+/Zn2+ transport system%2C permease component	Inorganic ion transport and metabolism
COO91_06019	cluster1	cluster1	cluster1	cluster1	none	Rhodanese-related sulfurtransferase	Inorganic ion transport and metabolism
COO91_05284	cluster1	cluster1	cluster1	cluster1	none	NhaP-type Na+/H+ or K+/H+ antiporter	Inorganic ion transport and metabolism
COO91_02126	cluster1	cluster1	cluster1	cluster1	none	Cation transport regulator ChaB	Inorganic ion transport and metabolism
COO91_02478	cluster1	cluster1	cluster1	cluster1	none	Phosphodiesterase/alkaline phosphatase D	Inorganic ion transport and metabolism
COO91_11137	cluster1	cluster1	cluster1	cluster4	none	Phenylpropionate dioxygenase or related ring-hydroxylating dioxygenase%2C large terminal subunit	Inorganic ion transport and metabolism
COO91_08571	cluster1	cluster1	cluster1	cluster1	none	Large exoprotein involved in heme utilization or adhesion	Intracellular trafficking, secretion, and vesicular transport
COO91_07503	cluster1	cluster1	cluster1	cluster1	tamB	translocation and assembly module TamB	Intracellular trafficking, secretion, and vesicular transport
COO91_02097	cluster1	cluster1	cluster1	cluster1	hugZ	heme iron utilization protein	Iron acquisition and metabolism
COO91_00242	cluster1	cluster1	cluster1	cluster4	none	Periplasmic hemin-binding protein	Iron acquisition and metabolism
COO91_00308	cluster1	cluster1	cluster1	cluster1	none	hypothetical protein	Lipid transport and metabolism
COO91_02943	cluster1	cluster1	cluster1	cluster1	none	1-acyl-sn-glycerol-3-phosphate acyltransferase	Lipid transport and metabolism
COO91_00305	cluster1	cluster1	cluster1	cluster1	none	hypothetical protein	Lipid transport and metabolism
COO91_00243	cluster1	cluster1	cluster1	cluster1	none	Lysophospholipase%2C alpha-beta hydrolase superfamily	Lipid transport and metabolism
COO91_05263	cluster1	cluster1	cluster1	cluster1	none	hypothetical protein	Lipid transport and metabolism
COO91_01754	cluster1	cluster1	cluster1	cluster1	none	Phospholipase/lecithinase/hemolysin	Lipid transport and metabolism
COO91_09018	cluster1	cluster1	cluster1	cluster1	none	Cyclopropane fatty-acyl-phospholipid synthase and related methyltransferases	Lipid transport and metabolism
COO91_04933	cluster1	cluster1	cluster1	cluster1	none	Lysophospholipase%2C alpha-beta hydrolase superfamily	Lipid transport and metabolism
COO91_01590	cluster1	cluster1	cluster1	cluster1	none	1-acyl-sn-glycerol-3-phosphate acyltransferase	Lipid transport and metabolism
COO91_04932	cluster1	cluster1	cluster1	cluster1	none	1-acyl-sn-glycerol-3-phosphate acyltransferase	Lipid transport and metabolism
COO91_10320	cluster1	cluster1	cluster1	cluster1	none	Fatty-acid desaturase	Lipid transport and metabolism
COO91_02621	cluster1	cluster1	cluster1	cluster1	none	S-layer domain-containing protein	Lipid transport and metabolism
COO91_01226	cluster1	cluster1	cluster1	cluster2	none	Acyl-CoA synthetase	Lipid transport and metabolism
COO91_06044	cluster1	cluster1	cluster1	cluster1	gmhB	D-glycero-D-manno-heptose 1,7-bisphosphate phosphatase [EC:3.1.3.82 3.1.3.83]	Lipopolysaccharide biosynthesis
COO91_05307	cluster1	cluster1	cluster1	cluster1	E2.6.1.83	LL-diaminopimelate aminotransferase [EC:2.6.1.83]	Lysine biosynthesis
COO91_02687	cluster1	cluster1	cluster1	cluster1	mgtE	magnesium transporter	Membrane Transport
COO91_03060	cluster1	cluster1	cluster1	cluster1	none	Sodium-dependent phosphate transporter	Membrane Transport
COO91_04641	cluster1	cluster1	cluster1	cluster1	none	DNA-binding response regulator%2C NarL/FixJ family%2C containings REC and HTH domains	Membrane Transport
COO91_00759	cluster1	cluster1	cluster1	cluster1	none	Glucan-binding domain	Membrane Transport
COO91_07471	cluster1	cluster1	cluster1	cluster1	srpB	sulfur-regulated protein	Membrane Transport
COO91_02441	cluster1	cluster1	cluster1	cluster4	tlyC	putative hemolysin	Membrane Transport
COO91_05770	cluster1	cluster1	cluster1	cluster1	cofG	FO synthase subunit 1 [EC:2.5.1.77]	Methane metabolism
COO91_06390	cluster1	cluster1	cluster1	cluster1	cefD	isopenicillin-N epimerase [EC:5.1.1.17]	Miscellaneous
COO91_03864	cluster1	cluster1	cluster1	cluster1	none	Selenocysteine lyase/Cysteine desulfurase	Miscellaneous
COO91_04816	cluster1	cluster1	cluster1	cluster1	none	Lysophospholipase%2C alpha-beta hydrolase superfamily	Miscellaneous
COO91_01632	cluster1	cluster1	cluster1	cluster1	none	Pimeloyl-ACP methyl ester carboxylesterase	Miscellaneous
COO91_00519	cluster1	cluster1	cluster1	cluster1	none	putative dienelactone hydrolase	Miscellaneous
COO91_05739	cluster1	cluster1	cluster1	cluster1	sufB	Fe-S cluster assembly protein SufB	Miscellaneous
COO91_05737	cluster1	cluster1	cluster1	cluster1	sufD	Fe-S cluster assembly protein SufD	Miscellaneous
COO91_05738	cluster1	cluster1	cluster1	cluster1	ycf16	ABC transporter ATP-binding protein	Miscellaneous
COO91_04528	cluster1	cluster1	cluster1	cluster2	none	Fe-S cluster assembly iron-binding protein IscA	Miscellaneous
COO91_09798	cluster1	cluster1	cluster1	cluster1	-	putative transposase	Mobilome: prophages, transposons
COO91_03090	cluster1	cluster1	cluster1	cluster1	none	Transposase	Mobilome: prophages, transposons
COO91_04016	cluster1	cluster1	cluster1	cluster1	none	Transposase	Mobilome: prophages, transposons
COO91_08549	cluster1	cluster1	cluster1	cluster1	none	Transposase	Mobilome: prophages, transposons
COO91_03089	cluster1	cluster1	cluster1	cluster1	none	Transposase	Mobilome: prophages, transposons
COO91_00834	cluster1	cluster1	cluster1	cluster1	none	Transposase	Mobilome: prophages, transposons
COO91_00383	cluster1	cluster1	cluster1	cluster1	none	Transposase	Mobilome: prophages, transposons
COO91_03744	cluster1	cluster1	cluster1	cluster1	none	Transposase	Mobilome: prophages, transposons
COO91_07735	cluster1	cluster1	cluster1	cluster1	none	Transposase	Mobilome: prophages, transposons
COO91_08684	cluster1	cluster1	cluster1	cluster1	none	Transposase	Mobilome: prophages, transposons
COO91_10206	cluster1	cluster1	cluster1	cluster1	none	Transposase	Mobilome: prophages, transposons
COO91_05437	cluster1	cluster1	cluster1	cluster1	none	Transposase	Mobilome: prophages, transposons
COO91_09478	cluster1	cluster1	cluster1	cluster1	none	Transposase	Mobilome: prophages, transposons
COO91_00835	cluster1	cluster1	cluster1	cluster1	none	Transposase	Mobilome: prophages, transposons
COO91_09234	cluster1	cluster1	cluster1	cluster1	none	Transposase	Mobilome: prophages, transposons
COO91_03745	cluster1	cluster1	cluster1	cluster1	none	Transposase	Mobilome: prophages, transposons
COO91_00384	cluster1	cluster1	cluster1	cluster1	none	Transposase	Mobilome: prophages, transposons
COO91_10205	cluster1	cluster1	cluster1	cluster1	none	Transposase	Mobilome: prophages, transposons
COO91_05438	cluster1	cluster1	cluster1	cluster1	none	Transposase	Mobilome: prophages, transposons
COO91_04934	cluster1	cluster1	cluster1	cluster1	none	putative site-specific integrase-resolvase	Mobilome: prophages, transposons
COO91_07477	cluster1	cluster1	cluster1	cluster1	none	Transposase	Mobilome: prophages, transposons
COO91_11274	cluster1	cluster1	cluster1	cluster1	none	17 kDa surface antigen	Mobilome: prophages, transposons
COO91_09791	cluster1	cluster1	cluster1	cluster1	none	Transposase	Mobilome: prophages, transposons
COO91_10334	cluster1	cluster1	cluster1	cluster1	none	putative transposase YbfD/YdcC associated with H repeats	Mobilome: prophages, transposons
COO91_07736	cluster1	cluster1	cluster1	cluster4	none	Transposase	Mobilome: prophages, transposons
COO91_07204	cluster1	cluster1	cluster1	cluster4	none	Transposase	Mobilome: prophages, transposons
COO91_01484	cluster1	cluster1	cluster1	cluster4	none	Transposase	Mobilome: prophages, transposons
COO91_01470	cluster1	cluster1	cluster1	cluster4	none	Transposase	Mobilome: prophages, transposons
COO91_07774	cluster1	cluster1	cluster1	cluster4	none	Transposase	Mobilome: prophages, transposons
COO91_04858	cluster1	cluster1	cluster1	cluster4	none	Transposase	Mobilome: prophages, transposons
COO91_01455	cluster1	cluster1	cluster1	cluster4	none	Transposase	Mobilome: prophages, transposons
COO91_00871	cluster1	cluster1	cluster1	cluster4	none	Transposase	Mobilome: prophages, transposons
COO91_03237	cluster1	cluster1	cluster1	cluster4	none	Transposase	Mobilome: prophages, transposons
COO91_03244	cluster1	cluster1	cluster1	cluster4	none	Transposase	Mobilome: prophages, transposons
COO91_09233	cluster1	cluster1	cluster1	cluster4	none	Transposase	Mobilome: prophages, transposons
COO91_07619	cluster1	cluster1	cluster1	cluster1	none	DNA-binding response regulator%2C OmpR family%2C containings REC and winged-helix	Motility and Chemotaxis
COO91_00335	cluster1	cluster1	cluster1	cluster1	none	DNA-binding response regulator%2C OmpR family%2C containings REC and winged-helix	Motility and Chemotaxis
COO91_01695	cluster1	cluster1	cluster1	cluster1	none	CheY chemotaxis protein or a CheY-like REC	Motility and Chemotaxis
COO91_03242	cluster1	cluster1	cluster1	cluster1	none	DNA-binding response regulator%2C OmpR family%2C containings REC and winged-helix	Motility and Chemotaxis
COO91_05819	cluster1	cluster1	cluster1	cluster1	ppnK	NAD+ kinase [EC:2.7.1.23]	Nicotinate and nicotinamide metabolism
COO91_05354	cluster1	cluster1	cluster1	cluster1	cynT	carbonic anhydrase [EC:4.2.1.1]	Nitrogen metabolism
COO91_04050	cluster1	cluster1	cluster1	cluster1	gifA	glutamine synthetase inactivating factor	Nitrogen Metabolism
COO91_05894	cluster1	cluster1	cluster1	cluster1	narB	ferredoxin--nitrate reductase	Nitrogen metabolism
COO91_05896	cluster1	cluster1	cluster1	cluster1	nirA	ferredoxin--nitrite reductase	Nitrogen metabolism
COO91_05895	cluster1	cluster1	cluster1	cluster1	NRT	MFS transporter, NNP family, nitrate/nitrite transporter	Nitrogen metabolism
COO91_03508	cluster1	cluster1	cluster1	cluster1	nrtA	nitrate/nitrite transport system substrate-binding protein	Nitrogen metabolism
COO91_03509	cluster1	cluster1	cluster1	cluster1	nrtB	nitrate/nitrite transport system permease protein	Nitrogen metabolism
COO91_03507	cluster1	cluster1	cluster1	cluster1	nrtC	nitrate/nitrite transport system ATP-binding protein [EC:3.6.3.-]	Nitrogen metabolism
COO91_03500	cluster1	cluster1	cluster1	cluster1	HLIP_4	CAB/ELIP/HLIP superfamily of proteins	none
COO91_03501	cluster1	cluster1	cluster1	cluster1	HLIP_5	CAB/ELIP/HLIP superfamily of proteins	none
COO91_03502	cluster1	cluster1	cluster1	cluster1	HLIP_6	CAB/ELIP/HLIP superfamily of proteins	none
COO91_03503	cluster1	cluster1	cluster1	cluster1	HLIP_7	Protoheme ferro-lyase (ferrochelatase)	none
COO91_05772	cluster1	cluster1	cluster1	cluster1	HLIP_9	Protoheme ferro-lyase (ferrochelatase)	none
COO91_10268	cluster1	cluster1	cluster1	cluster1	NblA_4	phycobilisome degradation protein NblA	none
COO91_07449	cluster1	cluster1	cluster1	cluster1	none	hypothetical protein	none
COO91_06441	cluster1	cluster1	cluster1	cluster1	none	Permeases of the major facilitator superfamily	none
COO91_11016	cluster1	cluster1	cluster1	cluster1	none	hypothetical protein	none
COO91_02255	cluster1	cluster1	cluster1	cluster1	none	hypothetical protein	none
COO91_10713	cluster1	cluster1	cluster1	cluster1	none	hypothetical protein	none
COO91_05281	cluster1	cluster1	cluster1	cluster1	none	Transcriptional regulator	none
COO91_05575	cluster1	cluster1	cluster1	cluster1	none	hypothetical protein	none
COO91_11001	cluster1	cluster1	cluster1	cluster1	none	hypothetical protein	none
COO91_03706	cluster1	cluster1	cluster1	cluster1	none	hypothetical protein	none
COO91_09067	cluster1	cluster1	cluster1	cluster1	none	Ribbon-helix-helix	none
COO91_09888	cluster1	cluster1	cluster1	cluster1	none	hypothetical protein	none
COO91_04765	cluster1	cluster1	cluster1	cluster1	none	hypothetical protein	none
COO91_02612	cluster1	cluster1	cluster1	cluster1	none	hypothetical protein	none
COO91_03869	cluster1	cluster1	cluster1	cluster1	none	hypothetical protein	none
COO91_04518	cluster1	cluster1	cluster1	cluster1	none	Nucleoside-diphosphate-sugar pyrophosphorylase	none
COO91_04174	cluster1	cluster1	cluster1	cluster1	none	putative nucleic acid-binding protein%2C containings PIN domain	none
COO91_07333	cluster1	cluster1	cluster1	cluster1	none	hypothetical protein	none
COO91_04008	cluster1	cluster1	cluster1	cluster1	none	hypothetical protein	none
COO91_06106	cluster1	cluster1	cluster1	cluster1	none	Bacterial cell division membrane protein	none
COO91_09496	cluster1	cluster1	cluster1	cluster1	none	Methyl-accepting chemotaxis protein	none
COO91_02116	cluster1	cluster1	cluster1	cluster1	none	UDP-N-acetylenolpyruvoylglucosamine reductase	none
COO91_05266	cluster1	cluster1	cluster1	cluster1	none	hypothetical protein	none
COO91_02846	cluster1	cluster1	cluster1	cluster1	none	hypothetical protein	none
COO91_06752	cluster1	cluster1	cluster1	cluster1	none	hypothetical protein	none
COO91_05153	cluster1	cluster1	cluster1	cluster1	none	Prokaryotic membrane lipoprotein lipid attachment site profile	none
COO91_06164	cluster1	cluster1	cluster1	cluster1	none	hypothetical protein	none
COO91_06576	cluster1	cluster1	cluster1	cluster1	none	hypothetical protein	none
COO91_07450	cluster1	cluster1	cluster1	cluster1	none	hypothetical protein	none
COO91_00795	cluster1	cluster1	cluster1	cluster1	none	putative nuclease of the RNAse H fold%2C HicB family	none
COO91_00227	cluster1	cluster1	cluster1	cluster1	none	hypothetical protein	none
COO91_04782	cluster1	cluster1	cluster1	cluster1	none	hypothetical protein	none
COO91_10815	cluster1	cluster1	cluster1	cluster1	none	Methyl-accepting chemotaxis protein	none
COO91_08902	cluster1	cluster1	cluster1	cluster1	none	hypothetical protein	none
COO91_04425	cluster1	cluster1	cluster1	cluster1	none	hypothetical protein	none
COO91_06279	cluster1	cluster1	cluster1	cluster1	none	hypothetical protein	none
COO91_06422	cluster1	cluster1	cluster1	cluster1	none	hypothetical protein	none
COO91_02075	cluster1	cluster1	cluster1	cluster1	none	hypothetical protein	none
COO91_06314	cluster1	cluster1	cluster1	cluster1	none	hypothetical protein	none
COO91_09804	cluster1	cluster1	cluster1	cluster1	none	Protein of unknown function DUF1392	none
COO91_09796	cluster1	cluster1	cluster1	cluster1	none	serine/threonine protein kinase	none
COO91_03435	cluster1	cluster1	cluster1	cluster1	none	hypothetical protein	none
COO91_06981	cluster1	cluster1	cluster1	cluster1	none	hypothetical protein	none
COO91_08623	cluster1	cluster1	cluster1	cluster1	none	hypothetical protein	none
COO91_03792	cluster1	cluster1	cluster1	cluster1	none	hypothetical protein	none
COO91_07579	cluster1	cluster1	cluster1	cluster1	none	hypothetical protein	none
COO91_10890	cluster1	cluster1	cluster1	cluster1	none	hypothetical protein	none
COO91_09308	cluster1	cluster1	cluster1	cluster1	none	hypothetical protein	none
COO91_02818	cluster1	cluster1	cluster1	cluster1	none	Mobile element protein	none
COO91_02573	cluster1	cluster1	cluster1	cluster1	none	hypothetical protein	none
COO91_02277	cluster1	cluster1	cluster1	cluster1	none	hypothetical protein	none
COO91_00520	cluster1	cluster1	cluster1	cluster1	none	hypothetical protein	none
COO91_09512	cluster1	cluster1	cluster1	cluster1	none	hypothetical protein	none
COO91_06271	cluster1	cluster1	cluster1	cluster1	none	low temperature-induced protein	none
COO91_05449	cluster1	cluster1	cluster1	cluster1	none	hypothetical protein	none
COO91_08975	cluster1	cluster1	cluster1	cluster1	none	hypothetical protein	none
COO91_05424	cluster1	cluster1	cluster1	cluster1	none	hypothetical protein	none
COO91_02820	cluster1	cluster1	cluster1	cluster1	none	Mobile element protein	none
COO91_05152	cluster1	cluster1	cluster1	cluster1	none	hypothetical protein	none
COO91_02092	cluster1	cluster1	cluster1	cluster1	none	hypothetical protein	none
COO91_07649	cluster1	cluster1	cluster1	cluster1	none	Ribbon-helix-helix	none
COO91_02819	cluster1	cluster1	cluster1	cluster1	none	hypothetical protein	none
COO91_10558	cluster1	cluster1	cluster1	cluster1	none	hypothetical protein	none
COO91_04781	cluster1	cluster1	cluster1	cluster1	none	hypothetical protein	none
COO91_10888	cluster1	cluster1	cluster1	cluster1	none	hypothetical protein	none
COO91_03724	cluster1	cluster1	cluster1	cluster1	none	hypothetical protein	none
COO91_05180	cluster1	cluster1	cluster1	cluster1	none	hypothetical protein	none
COO91_05100	cluster1	cluster1	cluster1	cluster1	none	hypothetical protein	none
COO91_11000	cluster1	cluster1	cluster1	cluster1	none	hypothetical protein	none
COO91_03809	cluster1	cluster1	cluster1	cluster1	none	hypothetical protein	none
COO91_06197	cluster1	cluster1	cluster1	cluster1	none	hypothetical protein	none
COO91_11010	cluster1	cluster1	cluster1	cluster1	none	hypothetical protein	none
COO91_08736	cluster1	cluster1	cluster1	cluster1	none	hypothetical protein	none
COO91_01657	cluster1	cluster1	cluster1	cluster1	none	hypothetical protein	none
COO91_07510	cluster1	cluster1	cluster1	cluster1	none	hypothetical protein	none
COO91_03929	cluster1	cluster1	cluster1	cluster1	none	Protein of unknown function DUF2993	none
COO91_04223	cluster1	cluster1	cluster1	cluster1	none	hypothetical protein	none
COO91_06766	cluster1	cluster1	cluster1	cluster1	none	Carboxypeptidase C	none
COO91_04053	cluster1	cluster1	cluster1	cluster1	none	hypothetical protein	none
COO91_07521	cluster1	cluster1	cluster1	cluster1	none	hypothetical protein	none
COO91_02366	cluster1	cluster1	cluster1	cluster1	none	hypothetical protein	none
COO91_01649	cluster1	cluster1	cluster1	cluster1	none	Bacteriophage Syn9	none
COO91_05235	cluster1	cluster1	cluster1	cluster1	none	hypothetical protein	none
COO91_05928	cluster1	cluster1	cluster1	cluster1	none	hypothetical protein	none
COO91_04058	cluster1	cluster1	cluster1	cluster1	none	hypothetical protein	none
COO91_05620	cluster1	cluster1	cluster1	cluster1	none	hypothetical protein	none
COO91_10269	cluster1	cluster1	cluster1	cluster1	none	hypothetical protein	none
COO91_04052	cluster1	cluster1	cluster1	cluster1	none	Mobile element protein	none
COO91_03093	cluster1	cluster1	cluster1	cluster1	none	hypothetical protein	none
COO91_03506	cluster1	cluster1	cluster1	cluster1	none	hypothetical protein	none
COO91_08856	cluster1	cluster1	cluster1	cluster1	none	hypothetical protein	none
COO91_01644	cluster1	cluster1	cluster1	cluster1	none	hypothetical protein	none
COO91_02605	cluster1	cluster1	cluster1	cluster1	none	hypothetical protein	none
COO91_00362	cluster1	cluster1	cluster1	cluster1	none	Protein of unknown function DUF2949	none
COO91_03693	cluster1	cluster1	cluster1	cluster1	none	hypothetical protein	none
COO91_03959	cluster1	cluster1	cluster1	cluster1	none	hypothetical protein	none
COO91_01781	cluster1	cluster1	cluster1	cluster1	none	ATPase involved in DNA repair	none
COO91_00220	cluster1	cluster1	cluster1	cluster1	none	hypothetical protein	none
COO91_05283	cluster1	cluster1	cluster1	cluster1	none	hypothetical protein	none
COO91_04459	cluster1	cluster1	cluster1	cluster1	none	hypothetical protein	none
COO91_02629	cluster1	cluster1	cluster1	cluster1	none	hypothetical protein	none
COO91_02099	cluster1	cluster1	cluster1	cluster1	none	hypothetical protein	none
COO91_06980	cluster1	cluster1	cluster1	cluster1	none	hypothetical protein	none
COO91_01718	cluster1	cluster1	cluster1	cluster1	none	Putative sensory transduction regulator YbjN	none
COO91_01661	cluster1	cluster1	cluster1	cluster1	none	Ribbon-helix-helix	none
COO91_08855	cluster1	cluster1	cluster1	cluster1	none	hypothetical protein	none
COO91_05814	cluster1	cluster1	cluster1	cluster1	none	Protein of unknown function DUF2949	none
COO91_07608	cluster1	cluster1	cluster1	cluster1	none	Protein of unknown function DUF2945	none
COO91_08857	cluster1	cluster1	cluster1	cluster1	none	hypothetical protein	none
COO91_05145	cluster1	cluster1	cluster1	cluster1	none	hypothetical protein	none
COO91_01650	cluster1	cluster1	cluster1	cluster1	none	Protein of unknown function DUF2605	none
COO91_05835	cluster1	cluster1	cluster1	cluster1	none	hypothetical protein	none
COO91_03892	cluster1	cluster1	cluster1	cluster1	none	ABC-type multidrug transport system%2C ATPase and permease components	none
COO91_02466	cluster1	cluster1	cluster1	cluster1	none	hypothetical protein	none
COO91_08974	cluster1	cluster1	cluster1	cluster1	none	Protein of unknown function DUF760	none
COO91_02787	cluster1	cluster1	cluster1	cluster1	none	hypothetical protein	none
COO91_03960	cluster1	cluster1	cluster1	cluster1	none	protein of unknown function DUF4129	none
COO91_00215	cluster1	cluster1	cluster1	cluster1	none	hypothetical protein	none
COO91_05430	cluster1	cluster1	cluster1	cluster1	none	hypothetical protein	none
COO91_02644	cluster1	cluster1	cluster1	cluster1	none	hypothetical protein	none
COO91_03380	cluster1	cluster1	cluster1	cluster1	none	hypothetical protein	none
COO91_09016	cluster1	cluster1	cluster1	cluster1	none	hypothetical protein	none
COO91_02488	cluster1	cluster1	cluster1	cluster1	none	Nuclease subunit of the excinuclease complex	none
COO91_04022	cluster1	cluster1	cluster1	cluster1	none	hypothetical protein	none
COO91_05313	cluster1	cluster1	cluster1	cluster1	none	hypothetical protein	none
COO91_04056	cluster1	cluster1	cluster1	cluster1	none	hypothetical protein	none
COO91_07289	cluster1	cluster1	cluster1	cluster1	none	hypothetical protein	none
COO91_01209	cluster1	cluster1	cluster1	cluster1	none	hypothetical protein	none
COO91_07585	cluster1	cluster1	cluster1	cluster1	none	hypothetical protein	none
COO91_01827	cluster1	cluster1	cluster1	cluster1	none	hypothetical protein	none
COO91_02733	cluster1	cluster1	cluster1	cluster1	none	Protein of unknown function DUF760	none
COO91_00518	cluster1	cluster1	cluster1	cluster1	none	hypothetical protein	none
COO91_04431	cluster1	cluster1	cluster1	cluster1	none	hypothetical protein	none
COO91_01707	cluster1	cluster1	cluster1	cluster1	none	hypothetical protein	none
COO91_04937	cluster1	cluster1	cluster1	cluster1	none	hypothetical protein	none
COO91_02592	cluster1	cluster1	cluster1	cluster1	none	hypothetical protein	none
COO91_02489	cluster1	cluster1	cluster1	cluster1	none	hypothetical protein	none
COO91_02608	cluster1	cluster1	cluster1	cluster1	none	hypothetical protein	none
COO91_05102	cluster1	cluster1	cluster1	cluster1	none	Protein of unknown function DUF3181	none
COO91_03285	cluster1	cluster1	cluster1	cluster1	none	Protein of unknown function DUF2993	none
COO91_02760	cluster1	cluster1	cluster1	cluster1	none	hypothetical protein	none
COO91_04244	cluster1	cluster1	cluster1	cluster1	none	hypothetical protein	none
COO91_02490	cluster1	cluster1	cluster1	cluster1	none	hypothetical protein	none
COO91_04027	cluster1	cluster1	cluster1	cluster1	none	hypothetical protein	none
COO91_04457	cluster1	cluster1	cluster1	cluster1	none	translation initiation factor	none
COO91_02602	cluster1	cluster1	cluster1	cluster1	none	Protein of unknown function DUF4385	none
COO91_05686	cluster1	cluster1	cluster1	cluster1	none	hypothetical protein	none
COO91_02124	cluster1	cluster1	cluster1	cluster1	none	hypothetical protein	none
COO91_05769	cluster1	cluster1	cluster1	cluster1	none	hypothetical protein	none
COO91_02465	cluster1	cluster1	cluster1	cluster1	none	hypothetical protein	none
COO91_01755	cluster1	cluster1	cluster1	cluster1	none	hypothetical protein	none
COO91_09772	cluster1	cluster1	cluster1	cluster1	none	hypothetical protein	none
COO91_05104	cluster1	cluster1	cluster1	cluster1	none	hypothetical protein	none
COO91_02198	cluster1	cluster1	cluster1	cluster1	none	hypothetical protein	none
COO91_10084	cluster1	cluster1	cluster1	cluster1	none	hypothetical protein	none
COO91_04458	cluster1	cluster1	cluster1	cluster1	none	Prokaryotic membrane lipoprotein lipid attachment site profile	none
COO91_03283	cluster1	cluster1	cluster1	cluster1	none	Protein of unknown function DUF2809	none
COO91_07584	cluster1	cluster1	cluster1	cluster1	none	hypothetical protein	none
COO91_04061	cluster1	cluster1	cluster1	cluster1	none	hypothetical protein	none
COO91_00489	cluster1	cluster1	cluster1	cluster1	none	hypothetical protein	none
COO91_09769	cluster1	cluster1	cluster1	cluster1	none	hypothetical protein	none
COO91_08727	cluster1	cluster1	cluster1	cluster1	none	hypothetical protein	none
COO91_04029	cluster1	cluster1	cluster1	cluster1	none	hypothetical protein	none
COO91_05929	cluster1	cluster1	cluster1	cluster1	none	hypothetical protein	none
COO91_04898	cluster1	cluster1	cluster1	cluster1	none	putative transmembrane protein	none
COO91_01708	cluster1	cluster1	cluster1	cluster1	none	hypothetical protein	none
COO91_05813	cluster1	cluster1	cluster1	cluster1	none	hypothetical protein	none
COO91_08048	cluster1	cluster1	cluster1	cluster1	none	hypothetical protein	none
COO91_07284	cluster1	cluster1	cluster1	cluster1	none	hypothetical protein	none
COO91_05688	cluster1	cluster1	cluster1	cluster1	none	hypothetical protein	none
COO91_06274	cluster1	cluster1	cluster1	cluster1	none	hypothetical protein	none
COO91_04627	cluster1	cluster1	cluster1	cluster1	none	hypothetical protein	none
COO91_05728	cluster1	cluster1	cluster1	cluster1	none	hypothetical protein	none
COO91_00334	cluster1	cluster1	cluster1	cluster1	none	hypothetical protein	none
COO91_01621	cluster1	cluster1	cluster1	cluster1	none	DNA polymerase III%2C alpha subunit	none
COO91_02782	cluster1	cluster1	cluster1	cluster1	none	hypothetical protein	none
COO91_00230	cluster1	cluster1	cluster1	cluster1	none	hypothetical protein	none
COO91_01782	cluster1	cluster1	cluster1	cluster1	none	hypothetical protein	none
COO91_10216	cluster1	cluster1	cluster1	cluster1	none	hypothetical protein	none
COO91_03116	cluster1	cluster1	cluster1	cluster1	none	Protein of unknown function DUF3891	none
COO91_06275	cluster1	cluster1	cluster1	cluster1	none	hypothetical protein	none
COO91_07572	cluster1	cluster1	cluster1	cluster1	none	hypothetical protein	none
COO91_08972	cluster1	cluster1	cluster1	cluster1	none	hypothetical protein	none
COO91_04411	cluster1	cluster1	cluster1	cluster1	none	hypothetical protein	none
COO91_00260	cluster1	cluster1	cluster1	cluster1	none	hypothetical protein	none
COO91_05844	cluster1	cluster1	cluster1	cluster1	none	hypothetical protein	none
COO91_05685	cluster1	cluster1	cluster1	cluster1	none	hypothetical protein	none
COO91_07506	cluster1	cluster1	cluster1	cluster1	none	hypothetical protein	none
COO91_05815	cluster1	cluster1	cluster1	cluster1	none	hypothetical protein	none
COO91_00225	cluster1	cluster1	cluster1	cluster1	none	putative esterase	none
COO91_10069	cluster1	cluster1	cluster1	cluster1	none	hypothetical protein	none
COO91_04396	cluster1	cluster1	cluster1	cluster1	none	hypothetical protein	none
COO91_01742	cluster1	cluster1	cluster1	cluster1	none	hypothetical protein	none
COO91_10322	cluster1	cluster1	cluster1	cluster1	none	hypothetical protein	none
COO91_02609	cluster1	cluster1	cluster1	cluster1	none	hypothetical protein	none
COO91_01660	cluster1	cluster1	cluster1	cluster1	none	hypothetical protein	none
COO91_00226	cluster1	cluster1	cluster1	cluster1	none	Nucleoside-diphosphate-sugar epimerase	none
COO91_03068	cluster1	cluster1	cluster1	cluster1	none	hypothetical protein	none
COO91_08724	cluster1	cluster1	cluster1	cluster1	none	hypothetical protein	none
COO91_03292	cluster1	cluster1	cluster1	cluster1	none	hypothetical protein	none
COO91_11273	cluster1	cluster1	cluster1	cluster1	none	hypothetical protein	none
COO91_02127	cluster1	cluster1	cluster1	cluster1	none	putative poly	none
COO91_06689	cluster1	cluster1	cluster1	cluster1	none	hypothetical protein	none
COO91_00522	cluster1	cluster1	cluster1	cluster1	none	hypothetical protein	none
COO91_05064	cluster1	cluster1	cluster1	cluster1	none	hypothetical protein	none
COO91_05428	cluster1	cluster1	cluster1	cluster1	none	Metal-dependent hydrolase%2C endonuclease/exonuclease/phosphatase family	none
COO91_06688	cluster1	cluster1	cluster1	cluster1	none	hypothetical protein	none
COO91_10113	cluster1	cluster1	cluster1	cluster1	none	hypothetical protein	none
COO91_09673	cluster1	cluster1	cluster1	cluster1	none	hypothetical protein	none
COO91_01845	cluster1	cluster1	cluster1	cluster1	none	hypothetical protein	none
COO91_10112	cluster1	cluster1	cluster1	cluster1	none	hypothetical protein	none
COO91_07570	cluster1	cluster1	cluster1	cluster1	none	hypothetical protein	none
COO91_05698	cluster1	cluster1	cluster1	cluster1	none	hypothetical protein	none
COO91_03290	cluster1	cluster1	cluster1	cluster1	none	hypothetical protein	none
COO91_09513	cluster1	cluster1	cluster1	cluster1	none	hypothetical protein	none
COO91_10267	cluster1	cluster1	cluster1	cluster1	none	hypothetical protein	none
COO91_03084	cluster1	cluster1	cluster1	cluster1	none	hypothetical protein	none
COO91_09891	cluster1	cluster1	cluster1	cluster1	none	hypothetical protein	none
COO91_11219	cluster1	cluster1	cluster1	cluster1	none	hypothetical protein	none
COO91_11222	cluster1	cluster1	cluster1	cluster1	none	hypothetical protein	none
COO91_01620	cluster1	cluster1	cluster1	cluster1	none	hypothetical protein	none
COO91_03161	cluster1	cluster1	cluster1	cluster1	none	hypothetical protein	none
COO91_03551	cluster1	cluster1	cluster1	cluster1	none	hypothetical protein	none
COO91_06614	cluster1	cluster1	cluster1	cluster1	none	hypothetical protein	none
COO91_00535	cluster1	cluster1	cluster1	cluster1	none	hypothetical protein	none
COO91_02702	cluster1	cluster1	cluster1	cluster1	none	hypothetical protein	none
COO91_06329	cluster1	cluster1	cluster1	cluster1	none	hypothetical protein	none
COO91_10561	cluster1	cluster1	cluster1	cluster1	none	hypothetical protein	none
COO91_02468	cluster1	cluster1	cluster1	cluster1	none	Protein of unknown function DUF4090	none
COO91_05088	cluster1	cluster1	cluster1	cluster2	none	hypothetical protein	none
COO91_02817	cluster1	cluster1	cluster1	cluster2	none	Methyl-accepting chemotaxis protein	none
COO91_05658	cluster1	cluster1	cluster1	cluster2	none	hypothetical protein	none
COO91_06124	cluster1	cluster1	cluster1	cluster2	none	hypothetical protein	none
COO91_01482	cluster1	cluster1	cluster1	cluster2	none	hypothetical protein	none
COO91_02604	cluster1	cluster1	cluster1	cluster2	none	hypothetical protein	none
COO91_09474	cluster1	cluster1	cluster1	cluster2	none	hypothetical protein	none
COO91_04893	cluster1	cluster1	cluster1	cluster2	none	hypothetical protein	none
COO91_04080	cluster1	cluster1	cluster1	cluster2	none	hypothetical protein	none
COO91_03109	cluster1	cluster1	cluster1	cluster2	none	hypothetical protein	none
COO91_07518	cluster1	cluster1	cluster1	cluster2	none	hypothetical protein	none
COO91_09283	cluster1	cluster1	cluster1	cluster2	none	hypothetical protein	none
COO91_11237	cluster1	cluster1	cluster1	cluster2	none	Pyruvate/2-oxoglutarate dehydrogenase complex	none
COO91_04975	cluster1	cluster1	cluster1	cluster3	none	hypothetical protein	none
COO91_08867	cluster1	cluster1	cluster1	cluster3	none	hypothetical protein	none
COO91_09272	cluster1	cluster1	cluster1	cluster3	none	hypothetical protein	none
COO91_09675	cluster1	cluster1	cluster1	cluster3	none	hypothetical protein	none
COO91_07119	cluster1	cluster1	cluster1	cluster4	none	hypothetical protein	none
COO91_03575	cluster1	cluster1	cluster1	cluster4	none	hypothetical protein	none
COO91_04031	cluster1	cluster1	cluster1	cluster4	none	hypothetical protein	none
COO91_08272	cluster1	cluster1	cluster1	cluster4	none	hypothetical protein	none
COO91_04014	cluster1	cluster1	cluster1	cluster4	none	hypothetical protein	none
COO91_04375	cluster1	cluster1	cluster1	cluster4	none	hypothetical protein	none
COO91_03379	cluster1	cluster1	cluster1	cluster4	none	hypothetical protein	none
COO91_09708	cluster1	cluster1	cluster1	cluster4	none	hypothetical protein	none
COO91_05331	cluster1	cluster1	cluster1	cluster4	none	hypothetical protein	none
COO91_00811	cluster1	cluster1	cluster1	cluster4	none	hypothetical protein	none
COO91_10824	cluster1	cluster1	cluster1	cluster4	none	hypothetical protein	none
COO91_09945	cluster1	cluster1	cluster1	cluster4	none	hypothetical protein	none
COO91_02627	cluster1	cluster1	cluster1	cluster4	none	hypothetical protein	none
COO91_01662	cluster1	cluster1	cluster1	cluster4	none	hypothetical protein	none
COO91_06529	cluster1	cluster1	cluster1	cluster4	none	hypothetical protein	none
COO91_09671	cluster1	cluster1	cluster1	cluster4	none	Methyl-accepting chemotaxis protein	none
COO91_02500	cluster1	cluster1	cluster1	cluster4	none	hypothetical protein	none
COO91_05065	cluster1	cluster1	cluster1	cluster4	none	Mobile element protein	none
COO91_03044	cluster1	cluster1	cluster1	cluster4	none	hypothetical protein	none
COO91_04824	cluster1	cluster1	cluster1	cluster4	none	hypothetical protein	none
COO91_02956	cluster1	cluster1	cluster1	cluster4	none	Mobile element protein	none
COO91_06772	cluster1	cluster1	cluster1	cluster4	none	Mobile element protein	none
COO91_05570	cluster1	cluster1	cluster1	cluster4	none	hypothetical protein	none
COO91_02694	cluster1	cluster1	cluster1	cluster4	none	hypothetical protein	none
COO91_03881	cluster1	cluster1	cluster1	cluster4	none	Mobile element protein	none
COO91_08914	cluster1	cluster1	cluster1	cluster4	none	Mobile element protein	none
COO91_04768	cluster1	cluster1	cluster1	cluster4	none	hypothetical protein	none
COO91_08763	cluster1	cluster1	cluster1	cluster4	none	hypothetical protein	none
COO91_02222	cluster1	cluster1	cluster1	cluster4	none	hypothetical protein	none
COO91_03125	cluster1	cluster1	cluster1	cluster4	none	hypothetical protein	none
COO91_06847	cluster1	cluster1	cluster1	cluster4	none	hypothetical protein	none
COO91_06848	cluster1	cluster1	cluster1	cluster4	none	hypothetical protein	none
COO91_06193	cluster1	cluster1	cluster1	cluster4	none	hypothetical protein	none
COO91_04601	cluster1	cluster1	cluster1	cluster4	none	hypothetical protein	none
COO91_08858	cluster1	cluster1	cluster1	cluster4	none	hypothetical protein	none
COO91_03731	cluster1	cluster1	cluster1	cluster4	none	hypothetical protein	none
COO91_02730	cluster1	cluster1	cluster1	cluster1	mutT	8-oxo-dGTP diphosphatase [EC:3.6.1.55]	Nucleosides and Nucleotides
COO91_04424	cluster1	cluster1	cluster1	cluster1	uvrC	excinuclease ABC subunit C	Nucleotide excision repair
COO91_03294	cluster1	cluster1	cluster1	cluster1	coxA3,ctaD	ARTO, homolog of cytochrome c oxidase subunit I	Oxidative phosphorylation
COO91_03295	cluster1	cluster1	cluster1	cluster1	coxB3,ctaC	ARTO, homolog of cytochrome c oxidase subunit II	Oxidative phosphorylation
COO91_07451	cluster1	cluster1	cluster1	cluster1	ndhD1	NADH dehydrogenase subunit 4	Oxidative phosphorylation
COO91_07446	cluster1	cluster1	cluster1	cluster1	ndhF1	NADH dehydrogenase subunit 5	Oxidative phosphorylation
COO91_04844	cluster1	cluster1	cluster1	cluster1	eda	2-dehydro-3-deoxyphosphogluconate aldolase / (4S)-4-hydroxy-2-oxoglutarate aldolase [EC:4.1.2.14 4.1.3.42]	Pentose phosphate pathway
COO91_07322	cluster1	cluster1	cluster1	cluster1	gnd	6-phosphogluconate dehydrogenase	Pentose phosphate pathway
COO91_04288	cluster1	cluster1	cluster1	cluster1	tal	transaldolase	Pentose phosphate pathway
COO91_04289	cluster1	cluster1	cluster1	cluster1	zwf	glucose 6-phosphate dehydrogenase	Pentose phosphate pathway
COO91_08923	cluster1	cluster1	cluster1	cluster1	bcrC	undecaprenyl-diphosphatase [EC:3.6.1.27]	Peptidoglycan biosynthesis
COO91_06030	cluster1	cluster1	cluster1	cluster1	mysD	D-alanine-D-alanine ligase [EC:6.3.2.4]	Peptidoglycan biosynthesis
COO91_06163	cluster1	cluster1	cluster1	cluster1	AROA2	3-deoxy-7-phosphoheptulonate synthase [EC:2.5.1.54]	Phenylalanine, tyrosine and tryptophan biosynthesis
COO91_06201	cluster1	cluster1	cluster1	cluster1	aroF	3-deoxy-7-phosphoheptulonate synthase [EC:2.5.1.54]	Phenylalanine, tyrosine and tryptophan biosynthesis
COO91_03092	cluster1	cluster1	cluster1	cluster1	aroQ	3-dehydroquinate dehydratase II [EC:4.2.1.10]	Phenylalanine, tyrosine and tryptophan biosynthesis
COO91_06966	cluster1	cluster1	cluster1	cluster1	NblA_2	Phycobilisome degradation protein NblA	Photosynthesis
COO91_04009	cluster1	cluster1	cluster1	cluster1	petG	cytochrome b6-f complex subunit 5	Photosynthesis
COO91_02607	cluster1	cluster1	cluster1	cluster1	petJ_1	cytochrome c6	Photosynthesis
COO91_04589	cluster1	cluster1	cluster1	cluster1	psaX	photosystem I 4.8kDa protein	Photosynthesis
COO91_00146	cluster1	cluster1	cluster1	cluster1	psbA_1	photosystem II P680 reaction center D1 protein	Photosynthesis
COO91_02172	cluster1	cluster1	cluster1	cluster1	psbA_2	photosystem II P680 reaction center D1 protein	Photosynthesis
COO91_03302	cluster1	cluster1	cluster1	cluster1	psbA_5	photosystem II P680 reaction center D1 protein	Photosynthesis
COO91_07583	cluster1	cluster1	cluster1	cluster1	psbA_6	photosystem II P680 reaction center D1 protein	Photosynthesis
COO91_07105	cluster1	cluster1	cluster1	cluster3	petJ_3	cytochrome c6	Photosynthesis
COO91_06769	cluster1	cluster1	cluster1	cluster1	chlH, cobN/chlH	magnesium chelatase subunit H [EC:6.6.1.1]	Porphyrin and chlorophyll metabolism
COO91_05967	cluster1	cluster1	cluster1	cluster1	chlM	magnesium-protoporphyrin O-methyltransferase [EC:2.1.1.11]	Porphyrin and chlorophyll metabolism
COO91_04291	cluster1	cluster1	cluster1	cluster1	cobB-cbiA	cobyrinic acid a,c-diamide synthase [EC:6.3.5.9 6.3.5.11]	Porphyrin and chlorophyll metabolism
COO91_04430	cluster1	cluster1	cluster1	cluster1	cobM	precorrin-4/cobalt-precorrin-4 C11-methyltransferase [EC:2.1.1.133 2.1.1.271]	Porphyrin and chlorophyll metabolism
COO91_03164	cluster1	cluster1	cluster1	cluster1	hemH	ferrochelatase [EC:4.99.1.1]	Porphyrin and chlorophyll metabolism
COO91_05305	cluster1	cluster1	cluster1	cluster1	htpX	heat shock protein HtpX [EC:3.4.24.-]	Posttranslational modification, protein turnover, chaperones
COO91_06745	cluster1	cluster1	cluster1	cluster1	none	Periplasmic serine protease	Posttranslational modification, protein turnover, chaperones
COO91_10731	cluster1	cluster1	cluster1	cluster1	none	Protein-disulfide isomerase	Posttranslational modification, protein turnover, chaperones
COO91_03381	cluster1	cluster1	cluster1	cluster1	none	Formylglycine-generating enzyme%2C required for sulfatase activity%2C containings SUMF1/FGE domain	Posttranslational modification, protein turnover, chaperones
COO91_02251	cluster1	cluster1	cluster1	cluster1	none	putative aspartyl protease	Posttranslational modification, protein turnover, chaperones
COO91_02652	cluster1	cluster1	cluster1	cluster1	none	Zn-dependent protease with chaperone function	Posttranslational modification, protein turnover, chaperones
COO91_05181	cluster1	cluster1	cluster1	cluster1	none	Molecular chaperone DnaK	Posttranslational modification, protein turnover, chaperones
COO91_03280	cluster1	cluster1	cluster1	cluster1	none	Putative SOS response-associated peptidase YedK	Posttranslational modification, protein turnover, chaperones
COO91_05315	cluster1	cluster1	cluster1	cluster1	none	Formylglycine-generating enzyme%2C required for sulfatase activity%2C containings SUMF1/FGE domain	Posttranslational modification, protein turnover, chaperones
COO91_02710	cluster1	cluster1	cluster1	cluster1	none	Periplasmic serine protease%2C ClpP class	Posttranslational modification, protein turnover, chaperones
COO91_09339	cluster1	cluster1	cluster1	cluster1	none	Protein-disulfide isomerase	Posttranslational modification, protein turnover, chaperones
COO91_07468	cluster1	cluster1	cluster1	cluster1	none	Transglutaminase-like enzyme%2C putative cysteine protease	Posttranslational modification, protein turnover, chaperones
COO91_00229	cluster1	cluster1	cluster1	cluster1	none	hypothetical protein	Posttranslational modification, protein turnover, chaperones
COO91_05041	cluster1	cluster1	cluster1	cluster1	none	Gamma-glutamyl:cysteine ligase YbdK%2C ATP-grasp superfamily	Posttranslational modification, protein turnover, chaperones
COO91_05439	cluster1	cluster1	cluster1	cluster1	none	Membrane associated serine protease%2C rhomboid family	Posttranslational modification, protein turnover, chaperones
COO91_05436	cluster1	cluster1	cluster1	cluster1	none	Membrane associated serine protease%2C rhomboid family	Posttranslational modification, protein turnover, chaperones
COO91_04506	cluster1	cluster1	cluster1	cluster1	none	CAAX amino terminal protease	Posttranslational modification, protein turnover, chaperones
COO91_02254	cluster1	cluster1	cluster1	cluster1	none	putative aspartyl protease	Posttranslational modification, protein turnover, chaperones
COO91_04067	cluster1	cluster1	cluster1	cluster1	trxA	thioredoxin 1	Posttranslational modification, protein turnover, chaperones
COO91_00375	cluster1	cluster1	cluster1	cluster1	mscS	small conductance mechanosensitive channel	Potassium metabolism
COO91_02978	cluster1	cluster1	cluster1	cluster1	none	nanoRNase/pAp phosphatase%2C hydrolyzes c-di-AMP and oligoRNAs	Potassium metabolism
COO91_06709	cluster1	cluster1	cluster1	cluster1	clpB	ATP-dependent Clp protease ATP-binding subunit ClpB	Protein Metabolism
COO91_03305	cluster1	cluster1	cluster1	cluster1	clpB	ATP-dependent Clp protease ATP-binding subunit ClpC	Protein Metabolism
COO91_05061	cluster1	cluster1	cluster1	cluster1	dnaJ9	curved DNA-binding protein	Protein Metabolism
COO91_02335	cluster1	cluster1	cluster1	cluster1	groES	chaperonin GroES	Protein Metabolism
COO91_07589	cluster1	cluster1	cluster1	cluster1	GRPE	molecular chaperone GrpE	Protein Metabolism
COO91_02117	cluster1	cluster1	cluster1	cluster1	hflX	GTPase	Protein Metabolism
COO91_02118	cluster1	cluster1	cluster1	cluster1	iaaA	beta-aspartyl-peptidase (threonine type) [EC:3.4.19.5]	Protein Metabolism
COO91_02701	cluster1	cluster1	cluster1	cluster1	infB	translation initiation factor IF-2	Protein Metabolism
COO91_03341	cluster1	cluster1	cluster1	cluster1	infC	translation initiation factor IF-3	Protein Metabolism
COO91_04797	cluster1	cluster1	cluster1	cluster1	msrA	peptide-methionine (S)-S-oxide reductase [EC:1.8.4.11]	Protein Metabolism
COO91_05401	cluster1	cluster1	cluster1	cluster1	msrB	peptide-methionine (R)-S-oxide reductase [EC:1.8.4.12]	Protein Metabolism
COO91_08844	cluster1	cluster1	cluster1	cluster1	none	CheY chemotaxis protein or a CheY-like REC	Protein Metabolism
COO91_10190	cluster1	cluster1	cluster1	cluster1	none	putative Zn-dependent peptidase	Protein Metabolism
COO91_04864	cluster1	cluster1	cluster1	cluster1	phoH	phosphate starvation-inducible protein PhoH and related proteins	Protein Metabolism
COO91_05450	cluster1	cluster1	cluster1	cluster1	smpB	SsrA-binding protein	Protein Metabolism
COO91_03808	cluster1	cluster1	cluster1	cluster1	typA	GTP-binding protein TypA	Protein Metabolism
COO91_02860	cluster1	cluster1	cluster1	cluster1	ychF	ribosome-binding ATPase	Protein Metabolism
COO91_03995	cluster1	cluster1	cluster1	cluster1	rpoC2	RNA polymerase beta prime subunit	Purine metabolism
COO91_03265	cluster1	cluster1	cluster1	cluster1	dcd	dCTP deaminase [EC:3.5.4.13]	Pyrimidine metabolism
COO91_02689	cluster1	cluster1	cluster1	cluster1	pyrB	aspartate carbamoyltransferase catalytic subunit [EC:2.1.3.2]	Pyrimidine metabolism
COO91_10008	cluster1	cluster1	cluster1	cluster1	pyrE	orotate phosphoribosyltransferase [EC:2.4.2.10]	Pyrimidine metabolism
COO91_03202	cluster1	cluster1	cluster1	cluster1	accA	acetyl-CoA carboxylase carboxyl transferase subunit alpha [EC:6.4.1.2]	Pyruvate metabolism
COO91_03732	cluster1	cluster1	cluster1	cluster1	ackA	acetate kinase [EC:2.7.2.1]	Pyruvate metabolism
COO91_06196	cluster1	cluster1	cluster1	cluster1	acyP	acylphosphatase [EC:3.6.1.7]	Pyruvate metabolism
COO91_02130	cluster1	cluster1	cluster1	cluster1	atoB	acetyl-CoA C-acetyltransferase [EC:2.3.1.9]	Pyruvate metabolism
COO91_07472	cluster1	cluster1	cluster1	cluster1	pps	pyruvate, water dikinase [EC:2.7.9.2]	Pyruvate metabolism
COO91_06312	cluster1	cluster1	cluster1	cluster1	mvpT	antitoxin VapB	Regulation and Cell signaling
COO91_06057	cluster1	cluster1	cluster1	cluster1	none	cAMP-binding domain of CRP or a regulatory subunit of cAMP-dependent protein kinases	Regulation and Cell signaling
COO91_06152	cluster1	cluster1	cluster1	cluster1	none	cAMP-binding domain of CRP or a regulatory subunit of cAMP-dependent protein kinases	Regulation and Cell signaling
COO91_00213	cluster1	cluster1	cluster1	cluster1	none	CHAD domain	Regulation and Cell signaling
COO91_04222	cluster1	cluster1	cluster1	cluster1	none	Helicase HerA%2C central domain	Replication, recombination and repair
COO91_06311	cluster1	cluster1	cluster1	cluster1	none	Cdc6-related protein%2C AAA superfamily ATPase	Replication, recombination and repair
COO91_00300	cluster1	cluster1	cluster1	cluster1	none	Deoxyribodipyrimidine photolyase	Replication, recombination and repair
COO91_04377	cluster1	cluster1	cluster1	cluster1	none	Integrase	Replication, recombination and repair
COO91_00299	cluster1	cluster1	cluster1	cluster1	phrB	deoxyribodipyrimidine photo-lyase [EC:4.1.99.3]	Replication, recombination and repair
COO91_07508	cluster1	cluster1	cluster1	cluster1	uvsE	UV DNA damage endonuclease [EC:3.-.-.-]	Replication, recombination and repair
COO91_02779	cluster1	cluster1	cluster1	cluster1	Flv3a	Diflavin flavoprotein Sll0550	Respiration
COO91_05580	cluster1	cluster1	cluster1	cluster1	hupS	[NiFe] uptake hydrogenase small subunit	Respiration
COO91_08733	cluster1	cluster1	cluster1	cluster1	none	putative oxidoreductase	Respiration
COO91_07367	cluster1	cluster1	cluster1	cluster1	rpl21	50S ribosomal protein L21	Ribosome
COO91_07368	cluster1	cluster1	cluster1	cluster1	rpl27	50S ribosomal protein L27	Ribosome
COO91_06620	cluster1	cluster1	cluster1	cluster1	rpl31	50S ribosomal protein L31	Ribosome
COO91_06611	cluster1	cluster1	cluster1	cluster1	rpl36	50S ribosomal protein L36	Ribosome
COO91_03854	cluster1	cluster1	cluster1	cluster1	rps1	30S ribosomal protein S1	Ribosome
COO91_05387	cluster1	cluster1	cluster1	cluster1	rps15	30S ribosomal protein S15	Ribosome
COO91_04861	cluster1	cluster1	cluster1	cluster1	rps16	30S ribosomal protein S16	Ribosome
COO91_03616	cluster1	cluster1	cluster1	cluster1	rps2	30S ribosomal protein S2	Ribosome
COO91_02074	cluster1	cluster1	cluster1	cluster1	RP-S21	small subunit ribosomal protein S21	Ribosome
COO91_07648	cluster1	cluster1	cluster1	cluster1	RP-S21	small subunit ribosomal protein S21	Ribosome
COO91_03342	cluster1	cluster1	cluster1	cluster1	crhC	ATP-dependent RNA helicase	RNA degradation
COO91_06122	cluster1	cluster1	cluster1	cluster1	dnaK2	molecular chaperone DnaK	RNA degradation
COO91_02336	cluster1	cluster1	cluster1	cluster1	groEL	chaperonin GroEL	RNA degradation
COO91_02582	cluster1	cluster1	cluster1	cluster1	miaA	tRNA dimethylallyltransferase [EC:2.5.1.75]	RNA Metabolism
COO91_02704	cluster1	cluster1	cluster1	cluster1	nusA	N utilization substance protein A	RNA Metabolism
COO91_04913	cluster1	cluster1	cluster1	cluster1	nusB	transcription termination factor	RNA Metabolism
COO91_04427	cluster1	cluster1	cluster1	cluster1	rlmN	23S rRNA (adenine2503-C2)-methyltransferase [EC:2.1.1.192]	RNA Metabolism
COO91_07575	cluster1	cluster1	cluster1	cluster1	rsmI	16S rRNA (cytidine1402-2'-O)-methyltransferase [EC:2.1.1.198]	RNA Metabolism
COO91_07527	cluster1	cluster1	cluster1	cluster1	SIG2	RNA polymerase nonessential primary-like sigma factor	RNA Metabolism
COO91_07103	cluster1	cluster1	cluster1	cluster1	sigE	RNA polymerase group 2 sigma subunit	RNA Metabolism
COO91_03699	cluster1	cluster1	cluster1	cluster1	spoU	RNA methyltransferase, TrmH family	RNA Metabolism
COO91_05042	cluster1	cluster1	cluster1	cluster1	trmL	tRNA (cytidine/uridine-2'-O-)-methyltransferase [EC:2.1.1.207]	RNA Metabolism
COO91_03240	cluster1	cluster1	cluster1	cluster4	none	Permease of the drug/metabolite transporter	RNA Metabolism
COO91_06028	cluster1	cluster1	cluster1	cluster1	mysA	3-dehydroquinate synthase [EC:4.2.3.4]	Secondary Metabolism
COO91_07377	cluster1	cluster1	cluster1	cluster1	-	carotenoid cleavage dioxygenase	Secondary metabolites biosynthesis, transport and catabolism
COO91_08809	cluster1	cluster1	cluster1	cluster1	E3.1.1.45	carboxymethylenebutenolidase [EC:3.1.1.45]	Secondary metabolites biosynthesis, transport and catabolism
COO91_05070	cluster1	cluster1	cluster1	cluster1	none	Catechol 2%2C3-dioxygenase or other lactoylglutathione lyase family enzyme	Secondary metabolites biosynthesis, transport and catabolism
COO91_04536	cluster1	cluster1	cluster1	cluster1	none	Ubiqui/menaqui biosynthesis C-methylase UbiE	Secondary metabolites biosynthesis, transport and catabolism
COO91_04051	cluster1	cluster1	cluster1	cluster1	none	hypothetical protein	Secondary metabolites biosynthesis, transport and catabolism
COO91_09045	cluster1	cluster1	cluster1	cluster1	none	3'%2C5'-cyclic AMP phosphodiesterase CpdA	Signal transduction mechanisms
COO91_03326	cluster1	cluster1	cluster1	cluster1	none	CheY chemotaxis protein or a CheY-like REC	Signal transduction mechanisms
COO91_00306	cluster1	cluster1	cluster1	cluster1	none	Alpha/Beta hydrolase fold	Signal transduction mechanisms
COO91_10889	cluster1	cluster1	cluster1	cluster1	none	Serine/threonine protein kinase	Signal transduction mechanisms
COO91_03505	cluster1	cluster1	cluster1	cluster1	none	Rossmann-like alpha/beta/alpha sandwich fold	Signal transduction mechanisms
COO91_06971	cluster1	cluster1	cluster1	cluster1	none	hypothetical protein	Signal transduction mechanisms
COO91_07617	cluster1	cluster1	cluster1	cluster1	none	DNA-binding response regulator%2C OmpR family%2C containings REC and winged-helix	Signal transduction mechanisms
COO91_06126	cluster1	cluster1	cluster1	cluster1	none	Signal transduction histidine kinase	Signal transduction mechanisms
COO91_02939	cluster1	cluster1	cluster1	cluster1	none	CheY chemotaxis protein or a CheY-like REC	Signal transduction mechanisms
COO91_03954	cluster1	cluster1	cluster1	cluster1	none	PAS domain	Signal transduction mechanisms
COO91_01529	cluster1	cluster1	cluster1	cluster1	none	hypothetical protein	Signal transduction mechanisms
COO91_03955	cluster1	cluster1	cluster1	cluster1	none	K+-sensing histidine kinase KdpD	Signal transduction mechanisms
COO91_02964	cluster1	cluster1	cluster1	cluster1	none	CheY chemotaxis protein or a CheY-like REC	Signal transduction mechanisms
COO91_03999	cluster1	cluster1	cluster1	cluster1	none	CheY chemotaxis protein or a CheY-like REC	Signal transduction mechanisms
COO91_11269	cluster1	cluster1	cluster1	cluster1	none	K+-sensing histidine kinase KdpD	Signal transduction mechanisms
COO91_01588	cluster1	cluster1	cluster1	cluster1	none	CheY chemotaxis protein or a CheY-like REC	Signal transduction mechanisms
COO91_06969	cluster1	cluster1	cluster1	cluster1	prpC	PPM family protein phosphatase [EC:3.1.3.16]	Signal transduction mechanisms
COO91_05701	cluster1	cluster1	cluster1	cluster1	TSPO	benzodiazapine receptor	Signal transduction mechanisms
COO91_05930	cluster1	cluster1	cluster1	cluster1	TSPO	benzodiazapine receptor	Signal transduction mechanisms
COO91_05700	cluster1	cluster1	cluster1	cluster1	TSPO	benzodiazapine receptor	Signal transduction mechanisms
COO91_00880	cluster1	cluster1	cluster1	cluster2	none	Methyl-accepting chemotaxis protein	Signal transduction mechanisms
COO91_05063	cluster1	cluster1	cluster1	cluster1	agp	glucose-1-phosphate adenylyltransferase	Starch and sucrose metabolism
COO91_06200	cluster1	cluster1	cluster1	cluster1	lti2	probable alpha-glucanotransferase	Starch and sucrose metabolism
COO91_02752	cluster1	cluster1	cluster1	cluster1	malQ	4-alpha-glucanotransferase [EC:2.4.1.25]	Starch and sucrose metabolism
COO91_05846	cluster1	cluster1	cluster1	cluster1	mth	maltooligosyl trehalose hydrolase	Starch and sucrose metabolism
COO91_05847	cluster1	cluster1	cluster1	cluster1	mts	maltooligosyl trehalose synthase	Starch and sucrose metabolism
COO91_03951	cluster1	cluster1	cluster1	cluster1	susB	sucrose synthase	Starch and sucrose metabolism
COO91_05848	cluster1	cluster1	cluster1	cluster1	treH	alpha,alpha-trehalase	Starch and sucrose metabolism
COO91_05840	cluster1	cluster1	cluster1	cluster1	dps	starvation-inducible DNA-binding protein	Stress Response
COO91_06272	cluster1	cluster1	cluster1	cluster1	dps	starvation-inducible DNA-binding protein	Stress Response
COO91_03277	cluster1	cluster1	cluster1	cluster1	ECM4	putative glutathione S-transferase	Stress Response
COO91_04830	cluster1	cluster1	cluster1	cluster1	ECM4	putative glutathione S-transferase	Stress Response
COO91_02738	cluster1	cluster1	cluster1	cluster1	none	DNA-binding ferritin-like protein	Stress Response
COO91_03911	cluster1	cluster1	cluster1	cluster1	none	hypothetical protein	Stress Response
COO91_04513	cluster1	cluster1	cluster1	cluster1	none	Anti-anti-sigma regulatory factor	Stress Response
COO91_07577	cluster1	cluster1	cluster1	cluster1	amt1	ammonium transporter protein 1	Sulfur metabolism
COO91_00528	cluster1	cluster1	cluster1	cluster1	sat	sulfate adenylyltransferase [EC:2.7.7.4]	Sulfur metabolism
COO91_00591	cluster1	cluster1	cluster1	cluster1	tauD	taurine dioxygenase [EC:1.14.11.17]	Sulfur metabolism
COO91_06310	cluster1	cluster1	cluster1	cluster1	nifS	class-V aminotransferase	Thiamine metabolism
COO91_04981	cluster1	cluster1	cluster1	cluster1	rsgA	ribosome biogenesis GTPase [EC:3.6.1.-]	Thiamine metabolism
COO91_04352	cluster1	cluster1	cluster1	cluster1	thiG	thiamin biosynthesis protein	Thiamine metabolism
COO91_07293	cluster1	cluster1	cluster1	cluster1	-	AraC family transcriptional regulator	Transcription
COO91_05451	cluster1	cluster1	cluster1	cluster1	none	DNA-binding response regulator%2C NarL/FixJ family%2C containings REC and HTH domains	Transcription
COO91_07548	cluster1	cluster1	cluster1	cluster1	none	DNA-binding transcriptional regulator%2C AcrR family	Transcription
COO91_00313	cluster1	cluster1	cluster1	cluster1	none	AraC-type DNA-binding domain and AraC-containing proteins	Transcription
COO91_03288	cluster1	cluster1	cluster1	cluster1	none	hypothetical protein	Transcription
COO91_02634	cluster1	cluster1	cluster1	cluster1	none	Chemotaxis response regulator CheB%2C containings REC and protein-glutamate methylesterase domains	Transcription
COO91_00212	cluster1	cluster1	cluster1	cluster1	none	N-acetyltransferase%2C GNAT superfamily	Transcription
COO91_01589	cluster1	cluster1	cluster1	cluster1	none	DNA-binding transcriptional regulator YiaG%2C XRE-type HTH domain	Transcription
COO91_07571	cluster1	cluster1	cluster1	cluster1	none	DNA-binding response regulator%2C OmpR family%2C containings REC and winged-helix	Transcription
COO91_10708	cluster1	cluster1	cluster1	cluster1	none	Superfamily II DNA or RNA helicase%2C SNF2 family	Transcription
COO91_00210	cluster1	cluster1	cluster1	cluster1	none	DNA-binding response regulator%2C OmpR family%2C containings REC and winged-helix	Transcription
COO91_10756	cluster1	cluster1	cluster1	cluster1	none	Transcriptional regulator%2C containings XRE-family HTH domain	Transcription
COO91_04228	cluster1	cluster1	cluster1	cluster1	none	DNA-binding transcriptional regulator%2C GntR family	Transcription
COO91_02856	cluster1	cluster1	cluster1	cluster1	rcp1	DNA-binding response regulator, OmpR family, contains REC and winged-helix (wHTH) domain	Transcription
COO91_03066	cluster1	cluster1	cluster1	cluster1	aacA	aminoglycoside 6'-N-acetyltransferase [EC:2.3.1.82]	Translation, ribosomal structure and biogenesis
COO91_05632	cluster1	cluster1	cluster1	cluster1	none	Ribosomal protein S18 acetylase RimI and related acetyltransferases	Translation, ribosomal structure and biogenesis
COO91_01688	cluster1	cluster1	cluster1	cluster1	none	Protein N-acetyltransferase%2C RimJ/RimL family	Translation, ribosomal structure and biogenesis
COO91_00547	cluster1	cluster1	cluster1	cluster1	none	Valyl-tRNA synthetase	Translation, ribosomal structure and biogenesis
COO91_03111	cluster1	cluster1	cluster1	cluster1	none	putative component of the ribosome quality control	Translation, ribosomal structure and biogenesis
COO91_02781	cluster1	cluster1	cluster1	cluster1	none	RNA recognition motif	Translation, ribosomal structure and biogenesis
COO91_07476	cluster1	cluster1	cluster1	cluster1	none	Peptide chain release factor 1	Translation, ribosomal structure and biogenesis
COO91_00601	cluster1	cluster1	cluster1	cluster1	none	Methylase of polypeptide chain release factors	Translation, ribosomal structure and biogenesis
COO91_07647	cluster1	cluster1	cluster1	cluster1	none	RNA recognition motif	Translation, ribosomal structure and biogenesis
COO91_04628	cluster1	cluster1	cluster1	cluster1	none	Valyl-tRNA synthetase	Translation, ribosomal structure and biogenesis
COO91_08772	cluster1	cluster1	cluster1	cluster1	rbpA2	RNA-binding protein RbpA2	Translation, ribosomal structure and biogenesis
COO91_07578	cluster1	cluster1	cluster1	cluster1	rbpC	RNA-binding protein	Translation, ribosomal structure and biogenesis
COO91_01710	cluster1	cluster1	cluster1	cluster1	ybcJ	ribosome-associated protein	Translation, ribosomal structure and biogenesis
COO91_07616	cluster1	cluster1	cluster1	cluster1	cheA	two-component system, chemotaxis family, sensor kinase CheA [EC:2.7.13.3]	Two-component system
COO91_07612	cluster1	cluster1	cluster1	cluster1	cheB	two-component system, chemotaxis family, response regulator CheB [EC:3.1.1.61]	Two-component system
COO91_01500	cluster1	cluster1	cluster1	cluster1	cheBR_1	two-component system, chemotaxis family, CheB/CheR fusion protein [EC:2.1.1.80 3.1.1.61]	Two-component system
COO91_07610	cluster1	cluster1	cluster1	cluster1	cheR	chemotaxis protein methyltransferase CheR [EC:2.1.1.80]	Two-component system
COO91_03291	cluster1	cluster1	cluster1	cluster1	cheR	chemotaxis protein methyltransferase CheR [EC:2.1.1.80]	Two-component system
COO91_07615	cluster1	cluster1	cluster1	cluster1	cheW	purine-binding chemotaxis protein CheW	Two-component system
COO91_07614	cluster1	cluster1	cluster1	cluster1	mcp	methyl-accepting chemotaxis protein	Two-component system
COO91_05004	cluster1	cluster1	cluster1	cluster1	VTE1	tocopherol cyclase [EC:5.5.1.24]	Ubiquinone and other terpenoid-quinone biosynthesis
COO91_05726	cluster1	cluster1	cluster1	cluster1	copB	Cu2+-exporting ATPase [EC:3.6.3.4]	Virulence, Disease and Defense
COO91_03978	cluster1	cluster1	cluster1	cluster1	hslO	molecular chaperone Hsp33	Virulence, Disease and Defense
COO91_02785	cluster1	cluster1	cluster1	cluster1	none	Multidrug efflux pump subunit AcrB	Virulence, Disease and Defense
COO91_02784	cluster1	cluster1	cluster1	cluster1	none	Multidrug efflux pump subunit AcrA	Virulence, Disease and Defense
COO91_03504	cluster1	cluster1	cluster1	cluster1	none	Na+/H+ antiporter NhaD or related arsenite permease	Virulence, Disease and Defense
COO91_02134	cluster1	cluster1	cluster1	cluster1	none	CubicO group peptidase%2C beta-lactamase class C family	Virulence, Disease and Defense
COO91_11272	cluster1	cluster1	cluster1	cluster1	none	Anion permease ArsB/NhaD-like	Virulence, Disease and Defense
COO91_04030	cluster1	cluster1	cluster1	cluster1	none	Putative silver efflux pump	Virulence, Disease and Defense
COO91_01728	cluster1	cluster2	cluster1	cluster1	none	ABC-type Fe3+/spermidine/putrescine transport systems%2C ATPase components	Amino acid transport and metabolism
COO91_00911	cluster1	cluster2	cluster1	cluster1	none	DNA segregation ATPase FtsK/SpoIIIE	Cell Division and Cell Cycle
COO91_06903	cluster1	cluster2	cluster1	cluster1	none	dTDP-4-amino-4%2C6-dideoxygalactose transaminase	Cell wall/membrane/envelope biogenesis
COO91_11081	cluster1	cluster2	cluster1	cluster1	none	5-methylcytosine-specific restriction endonuclease McrA	Defense mechanisms
COO91_03204	cluster1	cluster2	cluster1	cluster1	GCH1	GTP cyclohydrolase I [EC:3.5.4.16]	Folate biosynthesis
COO91_08792	cluster1	cluster2	cluster1	cluster1	none	putative antitoxin%2C containings HTH domain	General function prediction only
COO91_10114	cluster1	cluster2	cluster1	cluster1	chaA	Ca2+:H+ antiporter	Inorganic ion transport and metabolism
COO91_02012	cluster1	cluster2	cluster1	cluster1	none	Transposase	Mobilome: prophages, transposons
COO91_06826	cluster1	cluster2	cluster1	cluster1	none	putative phage-associated protein	Mobilome: prophages, transposons
COO91_02705	cluster1	cluster2	cluster1	cluster1	none	hypothetical protein	none
COO91_06476	cluster1	cluster2	cluster1	cluster1	none	hypothetical protein	none
COO91_05392	cluster1	cluster2	cluster1	cluster1	none	Calycin	none
COO91_04939	cluster1	cluster2	cluster1	cluster1	none	hypothetical protein	none
COO91_03521	cluster1	cluster2	cluster1	cluster1	none	Protein of unknown function DUF3285	none
COO91_04088	cluster1	cluster2	cluster1	cluster1	none	hypothetical protein	none
COO91_07550	cluster1	cluster2	cluster1	cluster1	none	Protein of unknown function DUF2834	none
COO91_01712	cluster1	cluster2	cluster1	cluster1	none	hypothetical protein	none
COO91_01732	cluster1	cluster2	cluster1	cluster1	none	Acetylornithine deacetylase/Succinyl-diaminopimelate desuccinylase and related deacylases	none
COO91_04533	cluster1	cluster2	cluster1	cluster1	none	hypothetical protein	none
COO91_06112	cluster1	cluster2	cluster1	cluster1	none	hypothetical protein	none
COO91_01499	cluster1	cluster2	cluster1	cluster1	none	hypothetical protein	none
COO91_04796	cluster1	cluster2	cluster1	cluster1	none	hypothetical protein	none
COO91_07580	cluster1	cluster2	cluster1	cluster1	none	hypothetical protein	none
COO91_06286	cluster1	cluster2	cluster1	cluster1	none	hypothetical protein	none
COO91_10022	cluster1	cluster2	cluster1	cluster1	none	hypothetical protein	none
COO91_06968	cluster1	cluster2	cluster1	cluster1	none	hypothetical protein	none
COO91_06285	cluster1	cluster2	cluster1	cluster1	none	hypothetical protein	none
COO91_06121	cluster1	cluster2	cluster1	cluster1	none	hypothetical protein	none
COO91_02079	cluster1	cluster2	cluster1	cluster1	none	hypothetical protein	none
COO91_09212	cluster1	cluster2	cluster1	cluster1	none	hypothetical protein	none
COO91_05678	cluster1	cluster2	cluster1	cluster1	none	hypothetical protein	none
COO91_05679	cluster1	cluster2	cluster1	cluster1	none	hypothetical protein	none
COO91_04808	cluster1	cluster2	cluster1	cluster1	none	hypothetical protein	none
COO91_03979	cluster1	cluster2	cluster1	cluster1	none	hypothetical protein	none
COO91_03190	cluster1	cluster2	cluster1	cluster1	none	hypothetical protein	none
COO91_07283	cluster1	cluster2	cluster1	cluster1	none	Enolase	none
COO91_06180	cluster1	cluster2	cluster1	cluster1	none	hypothetical protein	none
COO91_08247	cluster1	cluster2	cluster1	cluster1	none	Arc-type ribbon-helix-helix	none
COO91_05388	cluster1	cluster2	cluster1	cluster1	PAM68	Protein of unknown function (DUF3464)	none
COO91_05309	cluster1	cluster2	cluster1	cluster1	ndh	NADH dehydrogenase [EC:1.6.99.3]	Oxidative phosphorylation
COO91_06029	cluster1	cluster2	cluster1	cluster1	mysB	caffeoyl-CoA O-methyltransferase [EC:2.1.1.104]	Phenylalanine metabolism
COO91_06186	cluster1	cluster2	cluster1	cluster1	cobA	cob(I)alamin adenosyltransferase [EC:2.5.1.17]	Porphyrin and chlorophyll metabolism
COO91_04757	cluster1	cluster2	cluster1	cluster1	sppA	protease IV [EC:3.4.21.-]	Posttranslational modification, protein turnover, chaperones
COO91_04507	cluster1	cluster2	cluster1	cluster1	clpS	ATP-dependent Clp protease adaptor protein ClpS	Protein Metabolism
COO91_06610	cluster1	cluster2	cluster1	cluster1	infA	translation initiation factor IF-1	Protein Metabolism
COO91_05279	cluster1	cluster2	cluster1	cluster1	none	Phytoene dehydrogenase-related protein	Protein Metabolism
COO91_06621	cluster1	cluster2	cluster1	cluster1	prfA	peptide chain release factor 1	Protein Metabolism
COO91_06153	cluster1	cluster2	cluster1	cluster1	none	cAMP-binding domain of CRP or a regulatory subunit of cAMP-dependent protein kinases	Regulation and Cell signaling
COO91_08464	cluster1	cluster2	cluster1	cluster1	none	Excinuclease UvrABC%2C nuclease subunit	Replication, recombination and repair
COO91_01733	cluster1	cluster2	cluster1	cluster1	splB	spore photoproduct lyase [EC:4.1.99.14]	Replication, recombination and repair
COO91_04879	cluster1	cluster2	cluster1	cluster1	rpl28	50S ribosomal protein L28	Ribosome
COO91_04527	cluster1	cluster2	cluster1	cluster1	rps12	30S ribosomal protein S12	Ribosome
COO91_02193	cluster1	cluster2	cluster1	cluster1	groEL	chaperonin GroEL	RNA degradation
COO91_04169	cluster1	cluster2	cluster1	cluster1	cheB_1	two-component system, chemotaxis family, response regulator CheB [EC:3.1.1.61]	Two-component system
COO91_07297	cluster1	cluster2	cluster1	cluster1	desA	phosphatidylcholine desaturase	Two-component system
COO91_02583	cluster1	cluster2	cluster1	cluster1	gyrB	DNA gyrase subunit B [EC:5.99.1.3]	Virulence, Disease and Defense
COO91_04523	cluster1	cluster2	cluster1	cluster1	tufA	translation elongation factor EF-Tu	Virulence, Disease and Defense
COO91_02216	cluster1	cluster3	cluster1	cluster1	none	hypothetical protein	none
COO91_00694	cluster1	cluster3	cluster1	cluster1	none	hypothetical protein	none
COO91_03614	cluster1	cluster3	cluster1	cluster1	none	hypothetical protein	none
COO91_02508	cluster1	cluster3	cluster1	cluster1	none	hypothetical protein	none
COO91_10825	cluster1	cluster3	cluster1	cluster1	none	hypothetical protein	none
COO91_07744	cluster1	cluster3	cluster1	cluster1	none	hypothetical protein	none
COO91_01829	cluster1	cluster4	cluster1	cluster1	none	UDP:flavonoid glycosyltransferase YjiC%2C YdhE family	Fatty Acids, Lipids, and Isoprenoids
COO91_10092	cluster1	cluster4	cluster1	cluster1	none	putative oxidoreductase	General function prediction only
COO91_01785	cluster1	cluster4	cluster1	cluster1	none	Glyoxylase or a related metal-dependent hydrolase%2C beta-lactamase superfamily II	General function prediction only
COO91_01289	cluster1	cluster4	cluster1	cluster1	none	putative dienelactone hydrolase	General function prediction only
COO91_00221	cluster1	cluster4	cluster1	cluster1	katE	catalase [EC:1.11.1.6]	Glyoxylate and dicarboxylate metabolism
COO91_00222	cluster1	cluster4	cluster1	cluster1	none	Rhodanese-related sulfurtransferase	Inorganic ion transport and metabolism
COO91_05013	cluster1	cluster4	cluster1	cluster1	none	conserved hypothetical protein-putative integraal membrane protein	none
COO91_03890	cluster1	cluster4	cluster1	cluster1	none	putative protein family Ycf35	none
COO91_05924	cluster1	cluster4	cluster1	cluster1	none	hypothetical protein	none
COO91_04600	cluster1	cluster4	cluster1	cluster1	none	hypothetical protein	none
COO91_08922	cluster1	cluster4	cluster1	cluster1	none	Outer membrane receptor proteins%2C mostly Fe transport	none
COO91_03238	cluster1	cluster4	cluster1	cluster1	none	hypothetical protein	none
COO91_04292	cluster1	cluster4	cluster1	cluster1	none	hypothetical protein	none
COO91_01666	cluster1	cluster4	cluster1	cluster1	none	hypothetical protein	none
COO91_07075	cluster1	cluster4	cluster1	cluster1	none	hypothetical protein	none
COO91_02308	cluster1	cluster4	cluster1	cluster1	none	hypothetical protein	none
COO91_00391	cluster1	cluster4	cluster1	cluster1	none	hypothetical protein	none
COO91_01786	cluster1	cluster4	cluster1	cluster1	none	Precorrin-3B methylase	none
COO91_03207	cluster1	cluster4	cluster1	cluster1	psaK	photosystem I subunit X	Photosynthesis
COO91_05578	cluster1	cluster4	cluster1	cluster1	hyaB	hydrogenase large subunit [EC:1.12.99.6]	Respiration
COO91_10649	cluster1	cluster4	cluster1	cluster1	none	Signal transduction histidine kinase	Signal transduction mechanisms
COO91_07292	cluster1	cluster4	cluster1	cluster1	katA	Mn-catalase	Stress Response
COO91_05744	cluster1	cluster4	cluster1	cluster1	none	Wobble nucleotide-excising tRNase	Translation, ribosomal structure and biogenesis
COO91_07104	cluster1	cluster4	cluster1	cluster1	none	Ribosomal protein S18 acetylase RimI and related acetyltransferases	Translation, ribosomal structure and biogenesis
COO91_07794	cluster1	cluster1	cluster2	cluster1	ABC.FEV.P	iron complex transport system permease protein	ABC transporters
COO91_07298	cluster1	cluster1	cluster2	cluster1	FAD3	acyl-lipid omega-3 desaturase [EC:1.14.19.25 1.14.19.35 1.14.19.36]	Lipid transport and metabolism
COO91_10562	cluster1	cluster1	cluster2	cluster1	none	hypothetical protein	Lipid transport and metabolism
COO91_03273	cluster1	cluster1	cluster2	cluster1	HLIP_3	Protoheme ferro-lyase (ferrochelatase)	none
COO91_06349	cluster1	cluster1	cluster2	cluster1	none	hypothetical protein	none
COO91_06160	cluster1	cluster1	cluster2	cluster1	none	ABC-type antimicrobial peptide transport system%2C permease component	none
COO91_01613	cluster1	cluster1	cluster2	cluster1	none	hypothetical protein	none
COO91_10539	cluster1	cluster1	cluster2	cluster1	none	hypothetical protein	none
COO91_03306	cluster1	cluster1	cluster2	cluster1	none	hypothetical protein	none
COO91_09758	cluster1	cluster1	cluster2	cluster1	none	CopG-like ribbon-helix-helix domain	none
COO91_00315	cluster1	cluster1	cluster2	cluster1	none	hypothetical protein	none
COO91_06592	cluster1	cluster1	cluster2	cluster1	none	hypothetical protein	none
COO91_04000	cluster1	cluster1	cluster2	cluster1	none	hypothetical protein	none
COO91_06175	cluster1	cluster1	cluster2	cluster1	none	hypothetical protein	none
COO91_04632	cluster1	cluster1	cluster2	cluster1	none	hypothetical protein	none
COO91_09349	cluster1	cluster1	cluster2	cluster1	none	hypothetical protein	none
COO91_04694	cluster1	cluster1	cluster2	cluster1	none	hypothetical protein	none
COO91_02546	cluster1	cluster1	cluster2	cluster1	none	Prokaryotic membrane lipoprotein lipid attachment site profile	none
COO91_07009	cluster1	cluster1	cluster2	cluster1	none	hypothetical protein	none
COO91_09236	cluster1	cluster1	cluster2	cluster1	NblA_3	Phycobilisome degradation protein NblA	Photosynthesis
COO91_00444	cluster1	cluster1	cluster2	cluster1	HSP20	HSP20 family protein	Posttranslational modification, protein turnover, chaperones
COO91_06601	cluster1	cluster1	cluster2	cluster1	rpl24	50S ribosomal protein L24	Ribosome
COO91_06602	cluster1	cluster1	cluster2	cluster1	rpl5	50S ribosomal protein L5	Ribosome
COO91_04522	cluster1	cluster1	cluster2	cluster1	rps10	30S ribosomal protein S10	Ribosome
COO91_06612	cluster1	cluster1	cluster2	cluster1	rps13	30S ribosomal protein S13	Ribosome
COO91_06594	cluster1	cluster1	cluster2	cluster1	rps19	30S ribosomal protein S19	Ribosome
COO91_06430	cluster1	cluster1	cluster2	cluster1	rimO	ribosomal protein S12 methylthiotransferase [EC:2.8.4.4]	RNA Metabolism
COO91_07775	cluster1	cluster1	cluster2	cluster1	none	Glutathione S-transferase	Stress Response
COO91_08782	cluster1	cluster1	cluster3	cluster1	none	Glutathione S-transferase	Cofactors, Vitamins, Prosthetic Groups, Pigments
COO91_05884	cluster1	cluster1	cluster3	cluster1	none	hypothetical protein	none
COO91_00388	cluster1	cluster1	cluster3	cluster1	none	hypothetical protein	none
COO91_07438	cluster1	cluster1	cluster4	cluster1	livK	branched-chain amino acid transport system substrate-binding protein	ABC transporters
COO91_10929	cluster1	cluster1	cluster4	cluster1	none	Phenylpropionate dioxygenase or related ring-hydroxylating dioxygenase%2C large terminal subunit	Cofactors, Vitamins, Prosthetic Groups, Pigments
COO91_06922	cluster1	cluster1	cluster4	cluster1	none	hypothetical protein	Defense mechanisms
COO91_02398	cluster1	cluster1	cluster4	cluster1	none	PD	Defense mechanisms
COO91_07370	cluster1	cluster1	cluster4	cluster1	none	2%2C4-dienoyl-CoA reductase or related NADH-dependent reductase%2C Old Yellow Enzyme	Energy production and conversion
COO91_03297	cluster1	cluster1	cluster4	cluster1	none	putative membrane protein	Function unknown
COO91_01623	cluster1	cluster1	cluster4	cluster1	CTDH	Ketosteroid isomerase-related protein	General function prediction only
COO91_03213	cluster1	cluster1	cluster4	cluster1	pipX	PII interaction protein X	General function prediction only
COO91_08692	cluster1	cluster1	cluster4	cluster1	GST	glutathione S-transferase [EC:2.5.1.18]	Glutathione metabolism
COO91_04170	cluster1	cluster1	cluster4	cluster1	xseB	exodeoxyribonuclease VII small subunit	Mismatch repair
COO91_00112	cluster1	cluster1	cluster4	cluster1	none	hypothetical protein	none
COO91_04639	cluster1	cluster1	cluster4	cluster1	none	hypothetical protein	none
COO91_09392	cluster1	cluster1	cluster4	cluster1	none	hypothetical protein	none
COO91_07092	cluster1	cluster1	cluster4	cluster1	none	hypothetical protein	none
COO91_03986	cluster1	cluster1	cluster4	cluster1	none	hypothetical protein	none
COO91_10981	cluster1	cluster1	cluster4	cluster1	none	hypothetical protein	none
COO91_09799	cluster1	cluster1	cluster4	cluster1	none	hypothetical protein	none
COO91_10519	cluster1	cluster1	cluster4	cluster1	none	hypothetical protein	none
COO91_01646	cluster1	cluster1	cluster4	cluster1	none	hypothetical protein	none
COO91_05774	cluster1	cluster1	cluster4	cluster1	none	putative conserved protein UCP037225	none
COO91_09793	cluster1	cluster1	cluster4	cluster1	none	hypothetical protein	none
COO91_03077	cluster1	cluster1	cluster4	cluster1	none	hypothetical protein	none
COO91_02663	cluster1	cluster1	cluster4	cluster1	none	hypothetical protein	none
COO91_00534	cluster1	cluster1	cluster4	cluster1	none	hypothetical protein	none
COO91_05987	cluster1	cluster1	cluster4	cluster1	none	hypothetical protein	none
COO91_02065	cluster1	cluster1	cluster4	cluster1	none	hypothetical protein	none
COO91_01653	cluster1	cluster1	cluster4	cluster1	none	hypothetical protein	none
COO91_09740	cluster1	cluster1	cluster4	cluster1	none	protein of unknown function DUF2281	none
COO91_06306	cluster1	cluster1	cluster4	cluster1	none	hypothetical protein	none
COO91_03424	cluster1	cluster1	cluster4	cluster1	none	hypothetical protein	none
COO91_07126	cluster1	cluster1	cluster4	cluster1	none	hypothetical protein	none
COO91_03293	cluster1	cluster1	cluster4	cluster1	coxC3,ctaE	ARTO, homolog of cytochrome c oxidase subunit III	Oxidative phosphorylation
COO91_10174	cluster1	cluster1	cluster4	cluster1	none	Parvulin-like peptidyl-prolyl isomerase	Posttranslational modification, protein turnover, chaperones
COO91_02806	cluster1	cluster1	cluster4	cluster1	none	Archaeal DNA helicase HerA or a related bacterial ATPase%2C containings HAS-barrel and ATPase domains	Replication, recombination and repair
COO91_06355	cluster1	cluster1	cluster4	cluster1	none	Polyhydroxyalkanoate synthesis regulator phasin	Signal transduction mechanisms
COO91_07310	cluster2	cluster2	cluster1	cluster2	none	Alpha-amylase/alpha-mannosidase%2C GH57 family	Carbohydrate transport and metabolism
COO91_01534	cluster2	cluster2	cluster1	cluster2	none	Chromosome segregation ATPase	Cell cycle control, cell division, chromosome partitioning
COO91_10381	cluster2	cluster2	cluster1	cluster2	none	AAA+-type ATPase%2C SpoVK/Ycf46/Vps4 family	Cell cycle control, cell division, chromosome partitioning
COO91_01029	cluster2	cluster2	cluster1	cluster2	none	Spore coat polysaccharide biosynthesis protein SpsF%2C cytidylyltransferase family	Cell wall/membrane/envelope biogenesis
COO91_00292	cluster2	cluster2	cluster1	cluster2	none	Chromosome segregation ATPase	Cofactors, Vitamins, Prosthetic Groups, Pigments
COO91_08794	cluster2	cluster2	cluster1	cluster2	ABC-2.A	ABC-2 type transport system ATP-binding protein	Defense mechanisms
COO91_01961	cluster2	cluster2	cluster1	cluster2	galE	UDP-glucose 4-epimerase [EC:5.1.3.2]	Galactose metabolism
COO91_05073	cluster2	cluster2	cluster1	cluster2	none	IS4 transposase	Mobilome: prophages, transposons
COO91_00761	cluster2	cluster2	cluster1	cluster2	none	Transposase	none
COO91_01010	cluster2	cluster2	cluster1	cluster2	none	hypothetical protein	none
COO91_06179	cluster2	cluster2	cluster1	cluster2	none	Replication-associated recombination protein RarA	none
COO91_01087	cluster2	cluster2	cluster1	cluster2	none	IS4 transposase	none
COO91_07278	cluster2	cluster2	cluster1	cluster2	none	hypothetical protein	none
COO91_00198	cluster2	cluster2	cluster1	cluster2	none	hypothetical protein	none
COO91_09992	cluster2	cluster2	cluster1	cluster2	none	CopG-like ribbon-helix-helix domain	none
COO91_02504	cluster2	cluster2	cluster1	cluster2	none	hypothetical protein	none
COO91_02215	cluster2	cluster2	cluster1	cluster2	none	hypothetical protein	none
COO91_10549	cluster2	cluster2	cluster1	cluster2	none	hypothetical protein	none
COO91_09616	cluster2	cluster2	cluster1	cluster2	none	hypothetical protein	none
COO91_09596	cluster2	cluster2	cluster1	cluster2	none	hypothetical protein	none
COO91_10716	cluster2	cluster2	cluster1	cluster2	none	hypothetical protein	none
COO91_08852	cluster2	cluster2	cluster1	cluster2	none	Uncaracterized surface protein containing fasciclin	none
COO91_04690	cluster2	cluster2	cluster1	cluster2	none	hypothetical protein	none
COO91_06041	cluster2	cluster2	cluster1	cluster2	none	hypothetical protein	none
COO91_02022	cluster2	cluster2	cluster1	cluster2	none	hypothetical protein	none
COO91_02881	cluster2	cluster2	cluster1	cluster2	none	hypothetical protein	none
COO91_04875	cluster2	cluster2	cluster1	cluster2	none	hypothetical protein	none
COO91_07870	cluster2	cluster2	cluster1	cluster2	none	hypothetical protein	none
COO91_01922	cluster2	cluster2	cluster1	cluster2	none	hypothetical protein	none
COO91_02043	cluster2	cluster2	cluster1	cluster2	none	hypothetical protein	none
COO91_03453	cluster2	cluster2	cluster1	cluster2	none	hypothetical protein	none
COO91_09817	cluster2	cluster2	cluster1	cluster2	none	hypothetical protein	none
COO91_09350	cluster2	cluster2	cluster1	cluster2	none	Methyl-accepting chemotaxis protein	none
COO91_02248	cluster2	cluster2	cluster1	cluster2	none	hypothetical protein	none
COO91_01310	cluster2	cluster2	cluster1	cluster2	none	hypothetical protein	none
COO91_10136	cluster2	cluster2	cluster1	cluster2	none	hypothetical protein	none
COO91_09870	cluster2	cluster2	cluster1	cluster2	none	Pyruvate/2-oxoglutarate dehydrogenase complex	none
COO91_03452	cluster2	cluster2	cluster1	cluster2	none	hypothetical protein	none
COO91_02445	cluster2	cluster2	cluster1	cluster2	none	hypothetical protein	none
COO91_06652	cluster2	cluster2	cluster1	cluster2	none	Outer membrane murein-binding lipoprotein Lpp	none
COO91_08071	cluster2	cluster2	cluster1	cluster2	none	hypothetical protein	none
COO91_06177	cluster2	cluster2	cluster1	cluster2	none	Adenylate kinase or related kinase	Nucleotide transport and metabolism
COO91_02613	cluster2	cluster2	cluster1	cluster2	petF	ferredoxin	Photosynthesis
COO91_05452	cluster2	cluster2	cluster1	cluster2	E3.1.3.48	protein-tyrosine phosphatase [EC:3.1.3.48]	Protein Metabolism
COO91_06284	cluster2	cluster2	cluster1	cluster2	add	adenosine deaminase [EC:3.5.4.4]	Purine metabolism
COO91_08317	cluster2	cluster2	cluster1	cluster2	none	Site-specific DNA-cytosine methylase	Replication, recombination and repair
COO91_00680	cluster2	cluster2	cluster1	cluster2	none	Succinate dehydrogenase/fumarate reductase%2C flavoprotein subunit	Respiration
COO91_02353	cluster2	cluster2	cluster1	cluster2	rpl32	50S ribosomal protein L32	Ribosome
COO91_06377	cluster2	cluster2	cluster1	cluster2	none	Membrane proteinase PrsW%2C cleaves anti-sigma factor RsiW%2C M82 family	Signal transduction mechanisms
COO91_01528	cluster2	cluster2	cluster1	cluster2	TST	thiosulfate/3-mercaptopyruvate sulfurtransferase [EC:2.8.1.1 2.8.1.2]	Sulfur metabolism
COO91_05642	cluster2	cluster2	cluster1	cluster2	none	putative Zn-finger containing protein%2C UPF0148 family	Transcription
COO91_09092	cluster2	cluster2	cluster1	cluster2	none	hypothetical protein	Translation, ribosomal structure and biogenesis
COO91_04524	cluster2	cluster2	cluster1	cluster2	fus	translation elongation factor EF-G	Virulence, Disease and Defense
COO91_10245	cluster2	cluster1	cluster2	cluster2	none	Beta-mannanase	Carbohydrate transport and metabolism
COO91_01920	cluster2	cluster1	cluster2	cluster2	none	DNA segregation ATPase FtsK/SpoIIIE	Cell cycle control, cell division, chromosome partitioning
COO91_03725	cluster2	cluster1	cluster2	cluster2	none	Endonuclease%2C Uma2 family	General function prediction only
COO91_08793	cluster2	cluster1	cluster2	cluster2	none	putative nucleic acid-binding protein%2C containings PIN domain	General function prediction only
COO91_00148	cluster2	cluster1	cluster2	cluster2	none	hypothetical protein	Mobilome: prophages, transposons
COO91_08291	cluster2	cluster1	cluster2	cluster2	none	GpW/Gp25/anti-adapter protein IraD	Mobilome: prophages, transposons
COO91_08214	cluster2	cluster1	cluster2	cluster2	none	IS4 transposase	Mobilome: prophages, transposons
COO91_07040	cluster2	cluster1	cluster2	cluster2	none	transposase Tn5	none
COO91_03110	cluster2	cluster1	cluster2	cluster2	none	hypothetical protein	none
COO91_02729	cluster2	cluster1	cluster2	cluster2	none	hypothetical protein	none
COO91_07582	cluster2	cluster1	cluster2	cluster2	none	Prokaryotic membrane lipoprotein lipid attachment site profile	none
COO91_07145	cluster2	cluster1	cluster2	cluster2	none	hypothetical protein	none
COO91_00041	cluster2	cluster1	cluster2	cluster2	none	hypothetical protein	none
COO91_03726	cluster2	cluster1	cluster2	cluster2	none	hypothetical protein	none
COO91_01531	cluster2	cluster1	cluster2	cluster2	none	hypothetical protein	none
COO91_04409	cluster2	cluster1	cluster2	cluster2	none	hypothetical protein	none
COO91_09636	cluster2	cluster1	cluster2	cluster2	none	hypothetical protein	none
COO91_02571	cluster2	cluster1	cluster2	cluster2	none	hypothetical protein	none
COO91_09446	cluster2	cluster1	cluster2	cluster2	none	hypothetical protein	none
COO91_08240	cluster2	cluster1	cluster2	cluster2	none	hypothetical protein	none
COO91_03192	cluster2	cluster1	cluster2	cluster2	none	hypothetical protein	none
COO91_05640	cluster2	cluster1	cluster2	cluster2	none	hypothetical protein	none
COO91_07611	cluster2	cluster1	cluster2	cluster2	none	hypothetical protein	none
COO91_02372	cluster2	cluster1	cluster2	cluster2	none	hypothetical protein	none
COO91_09444	cluster2	cluster1	cluster2	cluster2	none	hypothetical protein	none
COO91_02047	cluster2	cluster1	cluster2	cluster2	none	hypothetical protein	none
COO91_10733	cluster2	cluster1	cluster2	cluster2	none	hypothetical protein	none
COO91_08252	cluster2	cluster1	cluster2	cluster2	none	Pyruvate:ferredoxin oxidoreductase and related 2-oxoacid:ferredoxin oxidoreductases%2C beta subunit	none
COO91_01388	cluster2	cluster1	cluster2	cluster2	none	hypothetical protein	none
COO91_05723	cluster2	cluster1	cluster2	cluster2	none	hypothetical protein	none
COO91_10771	cluster2	cluster1	cluster2	cluster2	none	hypothetical protein	none
COO91_07730	cluster2	cluster1	cluster2	cluster2	none	hypothetical protein	none
COO91_04535	cluster2	cluster1	cluster2	cluster2	none	hypothetical protein	none
COO91_08603	cluster2	cluster1	cluster2	cluster2	none	hypothetical protein	none
COO91_08933	cluster2	cluster1	cluster2	cluster2	none	hypothetical protein	none
COO91_05048	cluster2	cluster1	cluster2	cluster2	none	TniQ	Replication, recombination and repair
COO91_08776	cluster2	cluster1	cluster2	cluster2	none	Catechol 2%2C3-dioxygenase or other lactoylglutathione lyase family enzyme	Secondary metabolites biosynthesis, transport and catabolism
COO91_03746	cluster2	cluster1	cluster2	cluster2	none	Ca2+-binding protein%2C RTX toxin-related	Secondary metabolites biosynthesis, transport and catabolism
COO91_08298	cluster2	cluster1	cluster2	cluster2	none	K+-sensing histidine kinase KdpD	Signal transduction mechanisms
COO91_01546	cluster2	cluster1	cluster2	cluster2	cysE	serine O-acetyltransferase [EC:2.3.1.30]	Sulfur metabolism
COO91_08297	cluster2	cluster1	cluster2	cluster2	none	DNA-binding response regulator%2C NarL/FixJ family%2C containings REC and HTH domains	Transcription
COO91_07055	cluster2	cluster1	cluster2	cluster2	kdpA	K+-transporting ATPase ATPase A chain [EC:3.6.3.12]	Two-component system
COO91_00317	cluster2	cluster1	cluster2	cluster2	none	Protein-tyrosine-phosphatase	Virulence, Disease and Defense
COO91_06653	cluster2	cluster2	cluster2	cluster3	natH	Transmembrane protein of acidic and neutral polar amino acids and His ABC uptake transporter (N-II)	ABC transporters
COO91_07314	cluster2	cluster2	cluster2	cluster2	pstS	phosphate transport system substrate-binding protein	ABC transporters
COO91_06037	cluster2	cluster2	cluster2	cluster3	pstS	phosphate transport system substrate-binding protein	ABC transporters
COO91_08696	cluster2	cluster2	cluster2	cluster2	asnB	asparagine synthase (glutamine-hydrolysing) [EC:6.3.5.4]	Alanine, aspartate and glutamate metabolism
COO91_00179	cluster2	cluster2	cluster2	cluster2	argZ	N-Dimethylarginine dimethylaminohydrolase	Amino acid transport and metabolism
COO91_09861	cluster2	cluster2	cluster2	cluster2	none	Lysophospholipase L1 or related esterase	Amino acid transport and metabolism
COO91_06287	cluster2	cluster2	cluster2	cluster2	none	Peptidase S1%2C PA clan	Amino acid transport and metabolism
COO91_07590	cluster2	cluster2	cluster2	cluster2	none	Alpha-mannosidase	Amino acid transport and metabolism
COO91_02233	cluster2	cluster2	cluster2	cluster2	none	putative membrane protein YhgE%2C phage infection protein	Amino Acids and Derivatives
COO91_04144	cluster2	cluster2	cluster2	cluster2	none	hypothetical protein	Amino Acids and Derivatives
COO91_06778	cluster2	cluster2	cluster2	cluster2	none	Cystathionine beta-lyase	Amino Acids and Derivatives
COO91_01366	cluster2	cluster2	cluster2	cluster2	none	Aspartate/methionine/tyrosine aminotransferase	Amino Acids and Derivatives
COO91_06176	cluster2	cluster2	cluster2	cluster2	gatB	aspartyl-tRNA(Asn)/glutamyl-tRNA(Gln) amidotransferase subunit B [EC:6.3.5.6 6.3.5.7]	Aminoacyl-tRNA biosynthesis
COO91_04741	cluster2	cluster2	cluster2	cluster3	E3.2.1.4	endoglucanase [EC:3.2.1.4]	Carbohydrate transport and metabolism
COO91_03011	cluster2	cluster2	cluster2	cluster2	emrB	MFS transporter, DHA2 family, multidrug resistance protein	Carbohydrate transport and metabolism
COO91_05919	cluster2	cluster2	cluster2	cluster2	invA	alkaline invertase	Carbohydrate transport and metabolism
COO91_05258	cluster2	cluster2	cluster2	cluster2	none	Glucose/arabinose dehydrogenase%2C beta-propeller fold	Carbohydrate transport and metabolism
COO91_06045	cluster2	cluster2	cluster2	cluster2	none	Glucose/arabinose dehydrogenase%2C beta-propeller fold	Carbohydrate transport and metabolism
COO91_10222	cluster2	cluster2	cluster2	cluster2	none	putative arabinose efflux permease%2C MFS family	Carbohydrate transport and metabolism
COO91_00542	cluster2	cluster2	cluster2	cluster2	none	Alpha-amylase/alpha-mannosidase%2C GH57 family	Carbohydrate transport and metabolism
COO91_00432	cluster2	cluster2	cluster2	cluster2	none	putative arabinose efflux permease%2C MFS family	Carbohydrate transport and metabolism
COO91_05871	cluster2	cluster2	cluster2	cluster2	none	Sugar phosphate isomerase/epimerase	Carbohydrate transport and metabolism
COO91_01975	cluster2	cluster2	cluster2	cluster2	none	N-acetylglucosaminyl deacetylase%2C LmbE family	Carbohydrate transport and metabolism
COO91_05867	cluster2	cluster2	cluster2	cluster2	none	Sugar phosphate isomerase/epimerase	Carbohydrate transport and metabolism
COO91_03620	cluster2	cluster2	cluster2	cluster2	none	Glycosyltransferase%2C GT2 family	Carbohydrate transport and metabolism
COO91_00290	cluster2	cluster2	cluster2	cluster2	none	Pullulanase/glycogen debranching enzyme	Carbohydrate transport and metabolism
COO91_04440	cluster2	cluster2	cluster2	cluster2	none	Ca2+-binding protein%2C RTX toxin-related	Carbohydrates
COO91_05641	cluster2	cluster2	cluster2	cluster2	none	Alpha-mannosidase	Carbohydrates
COO91_07793	cluster2	cluster2	cluster2	cluster2	none	Glycosidase	Carbohydrates
COO91_05054	cluster2	cluster2	cluster2	cluster2	none	Tetratricopeptide	Carbohydrates
COO91_00613	cluster2	cluster2	cluster2	cluster2	none	Serine/threonine protein kinase	Carbohydrates
COO91_10241	cluster2	cluster2	cluster2	cluster2	none	LysM repeat	Cell cycle control, cell division, chromosome partitioning
COO91_06099	cluster2	cluster2	cluster2	cluster2	none	LysM repeat	Cell cycle control, cell division, chromosome partitioning
COO91_00846	cluster2	cluster2	cluster2	cluster2	none	DNA segregation ATPase FtsK/SpoIIIE	Cell cycle control, cell division, chromosome partitioning
COO91_08116	cluster2	cluster2	cluster2	cluster2	none	AAA+-type ATPase%2C SpoVK/Ycf46/Vps4 family	Cell cycle control, cell division, chromosome partitioning
COO91_09136	cluster2	cluster2	cluster2	cluster2	none	Molecular chaperone DnaK	Cell cycle control, cell division, chromosome partitioning
COO91_08309	cluster2	cluster2	cluster2	cluster3	none	AAA+-type ATPase%2C SpoVK/Ycf46/Vps4 family	Cell cycle control, cell division, chromosome partitioning
COO91_01565	cluster2	cluster2	cluster2	cluster1	none	CheY chemotaxis protein or a CheY-like REC	Cell Division and Cell Cycle
COO91_01561	cluster2	cluster2	cluster2	cluster2	none	Histidine kinase-like ATPase%2C C-terminal domain	Cell Division and Cell Cycle
COO91_02404	cluster2	cluster2	cluster2	cluster2	none	Molybdopterin-guanine dinucleotide biosynthesis protein	Cell Division and Cell Cycle
COO91_09552	cluster2	cluster2	cluster2	cluster3	none	DNA primase	Cell Division and Cell Cycle
COO91_10964	cluster2	cluster2	cluster2	cluster2	parA	chromosome partitioning protein	Cell Division and Cell Cycle
COO91_07904	cluster2	cluster2	cluster2	cluster2	parB	chromosome partitioning protein, ParB family	Cell Division and Cell Cycle
COO91_08999	cluster2	cluster2	cluster2	cluster2	pilM	pilus assembly membrane protein PilM	Cell Division and Cell Cycle
COO91_03656	cluster2	cluster2	cluster2	cluster2	none	Flagellar hook protein FlgE	Cell motility
COO91_05441	cluster2	cluster2	cluster2	cluster2	ABC-2.OM	polysaccharide export outer membrane protein	Cell Wall and Capsule
COO91_05409	cluster2	cluster2	cluster2	cluster2	E3.5.1.28B	N-acetylmuramoyl-L-alanine amidase [EC:3.5.1.28]	Cell Wall and Capsule
COO91_03796	cluster2	cluster2	cluster2	cluster2	lptA	lipopolysaccharide export system protein LptA	Cell wall/membrane/envelope biogenesis
COO91_01558	cluster2	cluster2	cluster2	cluster2	murJ	putative peptidoglycan lipid II flippase	Cell wall/membrane/envelope biogenesis
COO91_05310	cluster2	cluster2	cluster2	cluster1	none	Transmembrane transcriptional regulator	Cell wall/membrane/envelope biogenesis
COO91_02617	cluster2	cluster2	cluster2	cluster2	none	Glycosyltransferase involved in cell wall bisynthesis	Cell wall/membrane/envelope biogenesis
COO91_01557	cluster2	cluster2	cluster2	cluster2	none	Small-conductance mechanosensitive channel	Cell wall/membrane/envelope biogenesis
COO91_02391	cluster2	cluster2	cluster2	cluster2	none	Small-conductance mechanosensitive channel	Cell wall/membrane/envelope biogenesis
COO91_09352	cluster2	cluster2	cluster2	cluster2	none	Spore coat polysaccharide biosynthesis protein SpsF%2C cytidylyltransferase family	Cell wall/membrane/envelope biogenesis
COO91_07252	cluster2	cluster2	cluster2	cluster2	none	Glycosyltransferase involved in cell wall bisynthesis	Cell wall/membrane/envelope biogenesis
COO91_05799	cluster2	cluster2	cluster2	cluster2	none	Murein DD-endopeptidase MepM and murein hydrolase activator NlpD%2C containing LysM domain	Cell wall/membrane/envelope biogenesis
COO91_04843	cluster2	cluster2	cluster2	cluster2	none	Lipoprotein-anchoring transpeptidase ErfK/SrfK	Cell wall/membrane/envelope biogenesis
COO91_07217	cluster2	cluster2	cluster2	cluster2	none	Outer membrane protein TolC	Cell wall/membrane/envelope biogenesis
COO91_00437	cluster2	cluster2	cluster2	cluster2	none	Glycosyltransferase involved in cell wall bisynthesis	Cell wall/membrane/envelope biogenesis
COO91_05097	cluster2	cluster2	cluster2	cluster2	none	Glycosyltransferase involved in cell wall bisynthesis	Cell wall/membrane/envelope biogenesis
COO91_00355	cluster2	cluster2	cluster2	cluster3	none	Spore coat polysaccharide biosynthesis protein SpsF%2C cytidylyltransferase family	Cell wall/membrane/envelope biogenesis
COO91_07887	cluster2	cluster2	cluster2	cluster3	none	Spore coat polysaccharide biosynthesis protein SpsF%2C cytidylyltransferase family	Cell wall/membrane/envelope biogenesis
COO91_03248	cluster2	cluster2	cluster2	cluster2	SAM50	outer membrane protein insertion porin family	Cell wall/membrane/envelope biogenesis
COO91_07306	cluster2	cluster2	cluster2	cluster2	SAM50	outer membrane protein insertion porin family	Cell wall/membrane/envelope biogenesis
COO91_00779	cluster2	cluster2	cluster2	cluster2	wcaI	colanic acid biosynthesis glycosyl transferase WcaI	Cell wall/membrane/envelope biogenesis
COO91_06636	cluster2	cluster2	cluster2	cluster2	wcaI	colanic acid biosynthesis glycosyl transferase WcaI	Cell wall/membrane/envelope biogenesis
COO91_07149	cluster2	cluster2	cluster2	cluster2	HLIP_10	Protoheme ferro-lyase (ferrochelatase)	Coenzyme transport and metabolism
COO91_02586	cluster2	cluster2	cluster2	cluster2	HLIP_2	Protoheme ferro-lyase (ferrochelatase)	Coenzyme transport and metabolism
COO91_05530	cluster2	cluster2	cluster2	cluster1	none	ABC-type cobalamin/Fe3+-siderophores transport system%2C ATPase component	Coenzyme transport and metabolism
COO91_00932	cluster2	cluster2	cluster2	cluster2	none	Flavin-dependent oxidoreductase	Coenzyme transport and metabolism
COO91_06139	cluster2	cluster2	cluster2	cluster2	none	Flavin-dependent oxidoreductase	Coenzyme transport and metabolism
COO91_06110	cluster2	cluster2	cluster2	cluster2	none	Thiamin phosphate synthase YjbQ%2C UPF0047 family	Coenzyme transport and metabolism
COO91_01900	cluster2	cluster2	cluster2	cluster2	none	Molybdopterin converting factor%2C small subunit	Coenzyme transport and metabolism
COO91_03203	cluster2	cluster2	cluster2	cluster1	none	NADP-dependent 3-hydroxy acid dehydrogenase YdfG	Cofactors, Vitamins, Prosthetic Groups, Pigments
COO91_11141	cluster2	cluster2	cluster2	cluster1	none	Delta-aminolevulinic acid dehydratase%2C porphobilinogen synthase	Cofactors, Vitamins, Prosthetic Groups, Pigments
COO91_01277	cluster2	cluster2	cluster2	cluster2	none	Dephospho-CoA kinase	Cofactors, Vitamins, Prosthetic Groups, Pigments
COO91_11013	cluster2	cluster2	cluster2	cluster2	none	Ca2+-binding protein%2C RTX toxin-related	Cofactors, Vitamins, Prosthetic Groups, Pigments
COO91_07824	cluster2	cluster2	cluster2	cluster2	none	Ca2+-binding protein%2C RTX toxin-related	Cofactors, Vitamins, Prosthetic Groups, Pigments
COO91_10371	cluster2	cluster2	cluster2	cluster2	none	Ca2+-binding protein%2C RTX toxin-related	Cofactors, Vitamins, Prosthetic Groups, Pigments
COO91_11019	cluster2	cluster2	cluster2	cluster2	none	Ca2+-binding protein%2C RTX toxin-related	Cofactors, Vitamins, Prosthetic Groups, Pigments
COO91_10367	cluster2	cluster2	cluster2	cluster2	none	Ca2+-binding protein%2C RTX toxin-related	Cofactors, Vitamins, Prosthetic Groups, Pigments
COO91_04131	cluster2	cluster2	cluster2	cluster2	none	Ca2+-binding protein%2C RTX toxin-related	Cofactors, Vitamins, Prosthetic Groups, Pigments
COO91_06046	cluster2	cluster2	cluster2	cluster2	none	Beta-glucanase%2C GH16 family	Cofactors, Vitamins, Prosthetic Groups, Pigments
COO91_08781	cluster2	cluster2	cluster2	cluster2	none	Glutathione S-transferase	Cofactors, Vitamins, Prosthetic Groups, Pigments
COO91_05278	cluster2	cluster2	cluster2	cluster2	none	Cell wall-associated hydrolase%2C NlpC family	Cofactors, Vitamins, Prosthetic Groups, Pigments
COO91_09937	cluster2	cluster2	cluster2	cluster2	none	Ca2+-binding protein%2C RTX toxin-related	Cofactors, Vitamins, Prosthetic Groups, Pigments
COO91_11202	cluster2	cluster2	cluster2	cluster2	none	hypothetical protein	Cofactors, Vitamins, Prosthetic Groups, Pigments
COO91_02952	cluster2	cluster2	cluster2	cluster2	none	Secreted protein containing bacterial Ig-like domain and vWFA domain	Cofactors, Vitamins, Prosthetic Groups, Pigments
COO91_07161	cluster2	cluster2	cluster2	cluster2	none	Molybdopterin or thiamine biosynthesis adenylyltransferase	Cofactors, Vitamins, Prosthetic Groups, Pigments
COO91_06954	cluster2	cluster2	cluster2	cluster2	none	Ca2+-binding protein%2C RTX toxin-related	Cofactors, Vitamins, Prosthetic Groups, Pigments
COO91_09309	cluster2	cluster2	cluster2	cluster2	none	Ca2+-binding protein%2C RTX toxin-related	Cofactors, Vitamins, Prosthetic Groups, Pigments
COO91_09089	cluster2	cluster2	cluster2	cluster2	none	Ca2+-binding protein%2C RTX toxin-related	Cofactors, Vitamins, Prosthetic Groups, Pigments
COO91_05276	cluster2	cluster2	cluster2	cluster2	none	hypothetical protein	Cofactors, Vitamins, Prosthetic Groups, Pigments
COO91_01274	cluster2	cluster2	cluster2	cluster2	none	Ubiqui/menaqui biosynthesis C-methylase UbiE	Cofactors, Vitamins, Prosthetic Groups, Pigments
COO91_10602	cluster2	cluster2	cluster2	cluster1	DNMT1	DNA (cytosine-5)-methyltransferase 1 [EC:2.1.1.37]	Cysteine and methionine metabolism
COO91_10404	cluster2	cluster2	cluster2	cluster1	DNMT1	DNA (cytosine-5)-methyltransferase 1 [EC:2.1.1.37]	Cysteine and methionine metabolism
COO91_09706	cluster2	cluster2	cluster2	cluster2	DNMT1	DNA (cytosine-5)-methyltransferase 1 [EC:2.1.1.37]	Cysteine and methionine metabolism
COO91_09643	cluster2	cluster2	cluster2	cluster2	DNMT1	DNA (cytosine-5)-methyltransferase 1 [EC:2.1.1.37]	Cysteine and methionine metabolism
COO91_11252	cluster2	cluster2	cluster2	cluster2	none	Actin-related protein	Cytoskeleton
COO91_09839	cluster2	cluster2	cluster2	cluster3	none	Actin-related protein	Cytoskeleton
COO91_01607	cluster2	cluster2	cluster2	cluster2	ABC.CD.P	putative ABC transport system permease protein	Defense mechanisms
COO91_11144	cluster2	cluster2	cluster2	cluster2	ABC.CD.TX	HlyD family secretion protein	Defense mechanisms
COO91_01608	cluster2	cluster2	cluster2	cluster2	ABC.CD.TX	HlyD family secretion protein	Defense mechanisms
COO91_06073	cluster2	cluster2	cluster2	cluster2	ABC.CD.TX	HlyD family secretion protein	Defense mechanisms
COO91_05277	cluster2	cluster2	cluster2	cluster2	cpt	chloramphenicol 3-O phosphotransferase [EC:2.7.1.-]	Defense mechanisms
COO91_03985	cluster2	cluster2	cluster2	cluster2	none	Multidrug efflux pump subunit AcrA	Defense mechanisms
COO91_11246	cluster2	cluster2	cluster2	cluster2	none	ABC-type bacteriocin/lantibiotic exporters%2C containing an N-terminal double-glycine peptidase domain	Defense mechanisms
COO91_08120	cluster2	cluster2	cluster2	cluster2	none	ABC-type bacteriocin/lantibiotic exporters%2C containing an N-terminal double-glycine peptidase domain	Defense mechanisms
COO91_08122	cluster2	cluster2	cluster2	cluster2	none	ABC-type bacteriocin/lantibiotic exporters%2C containing an N-terminal double-glycine peptidase domain	Defense mechanisms
COO91_00376	cluster2	cluster2	cluster2	cluster2	none	Multidrug efflux pump subunit AcrB	Defense mechanisms
COO91_11247	cluster2	cluster2	cluster2	cluster2	none	Multidrug efflux pump subunit AcrA	Defense mechanisms
COO91_08123	cluster2	cluster2	cluster2	cluster2	none	Multidrug efflux pump subunit AcrA	Defense mechanisms
COO91_00532	cluster2	cluster2	cluster2	cluster2	none	Multidrug efflux pump subunit AcrA	Defense mechanisms
COO91_04688	cluster2	cluster2	cluster2	cluster2	none	5-methylcytosine-specific restriction endonuclease McrA	Defense mechanisms
COO91_06084	cluster2	cluster2	cluster2	cluster2	none	Multidrug efflux pump subunit AcrA	Defense mechanisms
COO91_04466	cluster2	cluster2	cluster2	cluster2	none	mRNA-degrading endonuclease RelE%2C toxin component of the RelBE toxin-antitoxin system	Defense mechanisms
COO91_01942	cluster2	cluster2	cluster2	cluster2	none	DNA mismatch repair ATPase MutS	DNA Metabolism
COO91_09704	cluster2	cluster2	cluster2	cluster2	dnaB	replicative DNA helicase [EC:3.6.4.12]	DNA replication
COO91_01357	cluster2	cluster2	cluster2	cluster3	dnaB	replicative DNA helicase [EC:3.6.4.12]	DNA replication
COO91_08125	cluster2	cluster2	cluster2	cluster2	minD	cell division inhibitor	Dormancy and Sporulation
COO91_04812	cluster2	cluster2	cluster2	cluster2	none	Na+-transporting NADH:ubiqui oxidoreductase%2C subunit NqrB	Energy production and conversion
COO91_10089	cluster2	cluster2	cluster2	cluster2	none	Dehydrogenase	Energy production and conversion
COO91_02531	cluster2	cluster2	cluster2	cluster2	none	Cytochrome c%2C mono- and diheme variants	Energy production and conversion
COO91_06624	cluster2	cluster2	cluster2	cluster2	none	Methanol oxidation	Energy production and conversion
COO91_00541	cluster2	cluster2	cluster2	cluster2	fabG	3-ketoacyl-acyl carrier protein reductase	Fatty acid biosynthesis
COO91_10528	cluster2	cluster2	cluster2	cluster2	fabG	3-oxoacyl-[acyl-carrier protein] reductase [EC:1.1.1.100]	Fatty acid biosynthesis
COO91_08716	cluster2	cluster2	cluster2	cluster2	fabG	3-oxoacyl-[acyl-carrier protein] reductase [EC:1.1.1.100]	Fatty acid biosynthesis
COO91_01219	cluster2	cluster2	cluster2	cluster3	hetN	ketoacyl reductase	Fatty Acids, Lipids, and Isoprenoids
COO91_10237	cluster2	cluster2	cluster2	cluster2	hglE	heterocyst glycolipid synthase	Fatty Acids, Lipids, and Isoprenoids
COO91_10236	cluster2	cluster2	cluster2	cluster2	none	Acyl carrier protein	Fatty Acids, Lipids, and Isoprenoids
COO91_10233	cluster2	cluster2	cluster2	cluster2	none	hypothetical protein	Fatty Acids, Lipids, and Isoprenoids
COO91_10234	cluster2	cluster2	cluster2	cluster2	none	hypothetical protein	Fatty Acids, Lipids, and Isoprenoids
COO91_10235	cluster2	cluster2	cluster2	cluster2	none	NADP-dependent 3-hydroxy acid dehydrogenase YdfG	Fatty Acids, Lipids, and Isoprenoids
COO91_10231	cluster2	cluster2	cluster2	cluster2	none	Acyl carrier protein	Fatty Acids, Lipids, and Isoprenoids
COO91_10225	cluster2	cluster2	cluster2	cluster2	none	Acyl carrier protein	Fatty Acids, Lipids, and Isoprenoids
COO91_07660	cluster2	cluster2	cluster2	cluster2	none	Acyl carrier protein	Fatty Acids, Lipids, and Isoprenoids
COO91_01372	cluster2	cluster2	cluster2	cluster2	none	Glutamate-1-semialdehyde aminotransferase	Fatty Acids, Lipids, and Isoprenoids
COO91_10229	cluster2	cluster2	cluster2	cluster2	none	Non-ribosomal peptide synthetase component F	Fatty Acids, Lipids, and Isoprenoids
COO91_06983	cluster2	cluster2	cluster2	cluster2	phoD	alkaline phosphatase D [EC:3.1.3.1]	Folate biosynthesis
COO91_04530	cluster2	cluster2	cluster2	cluster2	manA	mannose-6-phosphate isomerase [EC:5.3.1.8]	Fructose and mannose metabolism
COO91_05239	cluster2	cluster2	cluster2	cluster2	-	membrane protein	Function unknown
COO91_04286	cluster2	cluster2	cluster2	cluster1	none	Carbamoylphosphate synthase small subunit	Function unknown
COO91_08285	cluster2	cluster2	cluster2	cluster2	none	Nucleoid-associated protein YgaU%2C containings BON and LysM domains	Function unknown
COO91_04813	cluster2	cluster2	cluster2	cluster2	none	putative conserved protein UCP026449	Function unknown
COO91_01553	cluster2	cluster2	cluster2	cluster2	none	Transmembrane protein TauE-like	Function unknown
COO91_06291	cluster2	cluster2	cluster2	cluster2	none	putative lipoprotein YddW%2C UPF0748 family	Function unknown
COO91_01730	cluster2	cluster2	cluster2	cluster2	none	Protein of unknown function DUF2555	Function unknown
COO91_01834	cluster2	cluster2	cluster2	cluster2	none	Transmembrane protein TauE-like	Function unknown
COO91_07378	cluster2	cluster2	cluster2	cluster2	none	hypothetical protein	Function unknown
COO91_08302	cluster2	cluster2	cluster2	cluster2	none	putative membrane protein	Function unknown
COO91_07326	cluster2	cluster2	cluster2	cluster2	none	putative lipoprotein YddW%2C UPF0748 family	Function unknown
COO91_03920	cluster2	cluster2	cluster2	cluster2	none	putative protein YjbI%2C containings pentapeptide repeats	Function unknown
COO91_05953	cluster2	cluster2	cluster2	cluster2	none	Protein of unknown function DUF177	Function unknown
COO91_01939	cluster2	cluster2	cluster2	cluster2	none	putative protein%2C containings a von Willebrand factor type A	Function unknown
COO91_03791	cluster2	cluster2	cluster2	cluster2	none	Serine protease%2C subtilisin family	Function unknown
COO91_06202	cluster2	cluster2	cluster2	cluster2	none	hypothetical protein	Function unknown
COO91_01738	cluster2	cluster2	cluster2	cluster2	none	putative lipoprotein YddW%2C UPF0748 family	Function unknown
COO91_06623	cluster2	cluster2	cluster2	cluster2	none	hypothetical protein	Function unknown
COO91_05406	cluster2	cluster2	cluster2	cluster2	none	Protein of unknown function DUF541	Function unknown
COO91_05677	cluster2	cluster2	cluster2	cluster2	none	hypothetical protein	Function unknown
COO91_02269	cluster2	cluster2	cluster2	cluster2	TROVE2	60 kDa SS-A/Ro ribonucleoprotein	Function unknown
COO91_01940	cluster2	cluster2	cluster2	cluster2	moxR	MoxR-like ATPase [EC:3.6.3.-]	General function prediction only
COO91_03823	cluster2	cluster2	cluster2	cluster1	none	putative protein%2C containings ParB-like nuclease domain	General function prediction only
COO91_08180	cluster2	cluster2	cluster2	cluster2	none	Tetratricopeptide	General function prediction only
COO91_07459	cluster2	cluster2	cluster2	cluster2	none	hypothetical protein	General function prediction only
COO91_08078	cluster2	cluster2	cluster2	cluster2	none	hypothetical protein	General function prediction only
COO91_07189	cluster2	cluster2	cluster2	cluster2	none	Alpha-2-macroglobulin%2C N-terminal 2	General function prediction only
COO91_06096	cluster2	cluster2	cluster2	cluster2	none	putative ATPase	General function prediction only
COO91_07319	cluster2	cluster2	cluster2	cluster2	none	Large extracellular alpha-helical protein	General function prediction only
COO91_01762	cluster2	cluster2	cluster2	cluster2	none	WD40 repeat	General function prediction only
COO91_10239	cluster2	cluster2	cluster2	cluster2	none	putative ATPase	General function prediction only
COO91_08299	cluster2	cluster2	cluster2	cluster2	none	putative membrane protein	General function prediction only
COO91_01351	cluster2	cluster2	cluster2	cluster2	none	Tetratricopeptide	General function prediction only
COO91_03518	cluster2	cluster2	cluster2	cluster2	none	Bax inhibitor 1-related	General function prediction only
COO91_03621	cluster2	cluster2	cluster2	cluster2	none	Protein of unknown function DUF839	General function prediction only
COO91_01577	cluster2	cluster2	cluster2	cluster2	none	FAD/NAD	General function prediction only
COO91_07600	cluster2	cluster2	cluster2	cluster2	none	Endonuclease%2C Uma2 family	General function prediction only
COO91_03580	cluster2	cluster2	cluster2	cluster2	none	Putative Zn-dependent protease%2C containings TPR repeats	General function prediction only
COO91_05869	cluster2	cluster2	cluster2	cluster2	none	Protein of unknown function UCP005295	General function prediction only
COO91_08312	cluster2	cluster2	cluster2	cluster2	none	putative ATPase	General function prediction only
COO91_06511	cluster2	cluster2	cluster2	cluster2	none	Protein of unknown function DUF697	General function prediction only
COO91_05759	cluster2	cluster2	cluster2	cluster2	none	putative ATPase%2C AAA+ superfamily	General function prediction only
COO91_04876	cluster2	cluster2	cluster2	cluster2	none	putative Zn-dependent peptidase	General function prediction only
COO91_02482	cluster2	cluster2	cluster2	cluster2	none	Endonuclease%2C Uma2 family	General function prediction only
COO91_03079	cluster2	cluster2	cluster2	cluster2	none	Endonuclease%2C Uma2 family	General function prediction only
COO91_05866	cluster2	cluster2	cluster2	cluster2	none	putative pyrophosphatase or phosphodiesterase%2C AlkP superfamily	General function prediction only
COO91_04182	cluster2	cluster2	cluster2	cluster2	none	hypothetical protein	General function prediction only
COO91_06893	cluster2	cluster2	cluster2	cluster2	none	Endonuclease%2C Uma2 family	General function prediction only
COO91_08947	cluster2	cluster2	cluster2	cluster2	none	putative nuclease	General function prediction only
COO91_08754	cluster2	cluster2	cluster2	cluster3	none	hypothetical protein	General function prediction only
COO91_03880	cluster2	cluster2	cluster2	cluster3	none	Dimeric alpha-beta barrel	General function prediction only
COO91_10865	cluster2	cluster2	cluster2	cluster3	none	GTPase SAR1 family domain	General function prediction only
COO91_05855	cluster2	cluster2	cluster2	cluster3	none	Tfp pilus assembly protein PilF	General function prediction only
COO91_01637	cluster2	cluster2	cluster2	cluster2	OCPX_1	Ketosteroid isomerase-related protein	General function prediction only
COO91_04877	cluster2	cluster2	cluster2	cluster2	pqqL	zinc protease [EC:3.4.24.-]	General function prediction only
COO91_07171	cluster2	cluster2	cluster2	cluster2	TC.SMR3	small multidrug resistance family-3 protein	General function prediction only
COO91_01899	cluster2	cluster2	cluster2	cluster2	thrC	threonine synthase	Glycine, serine and threonine metabolism
COO91_06886	cluster2	cluster2	cluster2	cluster2	glk	glucokinase [EC:2.7.1.2]	Glycolysis/Gluconeogenesis
COO91_04534	cluster2	cluster2	cluster2	cluster2	glsF, gltS	ferredoxin-dependent glutamate synthase	Glyoxylate and dicarboxylate metabolism
COO91_05865	cluster2	cluster2	cluster2	cluster2	katE	catalase [EC:1.11.1.6]	Glyoxylate and dicarboxylate metabolism
COO91_03989	cluster2	cluster2	cluster2	cluster2	hisD	histidinol dehydrogenase	Histidine metabolism
COO91_00531	cluster2	cluster2	cluster2	cluster2	none	putative flavoprotein CzcO associated with the cation diffusion facilitator CzcD	Inorganic ion transport and metabolism
COO91_02493	cluster2	cluster2	cluster2	cluster2	none	Tellurite resistance protein	Inorganic ion transport and metabolism
COO91_08303	cluster2	cluster2	cluster2	cluster2	none	Outer membrane receptor for ferric coprogen and ferric-rhodotorulic acid	Inorganic ion transport and metabolism
COO91_05201	cluster2	cluster2	cluster2	cluster2	none	Nitrous oxidase accessory protein NosD%2C containings tandem CASH domains	Inorganic ion transport and metabolism
COO91_06109	cluster2	cluster2	cluster2	cluster2	none	Phenylpropionate dioxygenase or related ring-hydroxylating dioxygenase%2C large terminal subunit	Inorganic ion transport and metabolism
COO91_05998	cluster2	cluster2	cluster2	cluster2	none	Tellurite resistance protein	Inorganic ion transport and metabolism
COO91_06080	cluster2	cluster2	cluster2	cluster2	phnI	phosphonate metabolism protein	Inorganic ion transport and metabolism
COO91_09265	cluster2	cluster2	cluster2	cluster2	none	Large exoprotein involved in heme utilization or adhesion	Intracellular trafficking, secretion, and vesicular transport
COO91_04342	cluster2	cluster2	cluster2	cluster2	none	Type IV secretory pathway%2C VirB10 components	Intracellular trafficking, secretion, and vesicular transport
COO91_04344	cluster2	cluster2	cluster2	cluster2	none	Type IV secretory pathway%2C VirB10 components	Intracellular trafficking, secretion, and vesicular transport
COO91_10859	cluster2	cluster2	cluster2	cluster3	none	Type IV secretory pathway%2C VirD2 components	Intracellular trafficking, secretion, and vesicular transport
COO91_10232	cluster2	cluster2	cluster2	cluster2	none	Acyl carrier protein	Lipid transport and metabolism
COO91_07254	cluster2	cluster2	cluster2	cluster2	none	1-acyl-sn-glycerol-3-phosphate acyltransferase	Lipid transport and metabolism
COO91_01105	cluster2	cluster2	cluster2	cluster2	none	hypothetical protein	Lipid transport and metabolism
COO91_01371	cluster2	cluster2	cluster2	cluster2	none	Non-ribosomal peptide synthetase component F	Lipid transport and metabolism
COO91_07822	cluster2	cluster2	cluster2	cluster3	none	hypothetical protein	Lipid transport and metabolism
COO91_10005	cluster2	cluster2	cluster2	cluster4	none	Putative aminopeptidase FrvX	Lipid transport and metabolism
COO91_06889	cluster2	cluster2	cluster2	cluster2	ABC.PE.P1	peptide/nickel transport system permease protein	Membrane Transport
COO91_04736	cluster2	cluster2	cluster2	cluster2	none	DNA-binding response regulator%2C NarL/FixJ family%2C containings REC and HTH domains	Membrane Transport
COO91_04972	cluster2	cluster2	cluster2	cluster2	pilT	twitching motility protein	Membrane Transport
COO91_07139	cluster2	cluster2	cluster2	cluster2	-	ribonuclease III family protein [EC:3.1.26.-]	Miscellaneous
COO91_06988	cluster2	cluster2	cluster2	cluster2	tgt	queuine tRNA-ribosyltransferase [EC:2.4.2.29]	Miscellaneous
COO91_09696	cluster2	cluster2	cluster2	cluster2	dinD_1	DNA-damage-inducible protein D	Mobilome: prophages, transposons
COO91_10108	cluster2	cluster2	cluster2	cluster1	none	Transposase%2C IS5 family	Mobilome: prophages, transposons
COO91_08132	cluster2	cluster2	cluster2	cluster2	none	IS4 transposase	Mobilome: prophages, transposons
COO91_10341	cluster2	cluster2	cluster2	cluster2	none	Phage-related replication protein YjqB%2C UPF0714/DUF867 family	Mobilome: prophages, transposons
COO91_07814	cluster2	cluster2	cluster2	cluster2	none	Prophage antirepressor	Mobilome: prophages, transposons
COO91_05370	cluster2	cluster2	cluster2	cluster2	none	Transposase	Mobilome: prophages, transposons
COO91_02620	cluster2	cluster2	cluster2	cluster2	none	Transposase	Mobilome: prophages, transposons
COO91_08304	cluster2	cluster2	cluster2	cluster2	none	Tail sheath protein	Mobilome: prophages, transposons
COO91_08289	cluster2	cluster2	cluster2	cluster2	none	Bacteriophage P2-related tail formation protein	Mobilome: prophages, transposons
COO91_08290	cluster2	cluster2	cluster2	cluster2	none	putative phage protein gp47/JayE	Mobilome: prophages, transposons
COO91_00971	cluster2	cluster2	cluster2	cluster2	none	Transposase	Mobilome: prophages, transposons
COO91_07334	cluster2	cluster2	cluster2	cluster2	none	IS4 transposase	Mobilome: prophages, transposons
COO91_10401	cluster2	cluster2	cluster2	cluster3	none	Bacteriophage protein gp37	Mobilome: prophages, transposons
COO91_00901	cluster2	cluster2	cluster2	cluster3	none	Transposase	Mobilome: prophages, transposons
COO91_10609	cluster2	cluster2	cluster2	cluster4	none	putative transposase YbfD/YdcC associated with H repeats	Mobilome: prophages, transposons
COO91_08632	cluster2	cluster2	cluster2	cluster2	none	DNA-binding response regulator%2C OmpR family%2C containings REC and winged-helix	Motility and Chemotaxis
COO91_08880	cluster2	cluster2	cluster2	cluster2	none	CheY chemotaxis protein or a CheY-like REC	Nitrogen Metabolism
COO91_02499	cluster2	cluster2	cluster2	cluster2	NblA_1	Phycobilisome degradation protein NblA	none
COO91_08811	cluster2	cluster2	cluster2	cluster1	none	hypothetical protein	none
COO91_06588	cluster2	cluster2	cluster2	cluster1	none	hypothetical protein	none
COO91_02501	cluster2	cluster2	cluster2	cluster1	none	hypothetical protein	none
COO91_01001	cluster2	cluster2	cluster2	cluster1	none	hypothetical protein	none
COO91_04172	cluster2	cluster2	cluster2	cluster1	none	hypothetical protein	none
COO91_02548	cluster2	cluster2	cluster2	cluster1	none	hypothetical protein	none
COO91_00307	cluster2	cluster2	cluster2	cluster1	none	hypothetical protein	none
COO91_07345	cluster2	cluster2	cluster2	cluster1	none	hypothetical protein	none
COO91_06158	cluster2	cluster2	cluster2	cluster1	none	hypothetical protein	none
COO91_05767	cluster2	cluster2	cluster2	cluster1	none	hypothetical protein	none
COO91_07027	cluster2	cluster2	cluster2	cluster1	none	hypothetical protein	none
COO91_03438	cluster2	cluster2	cluster2	cluster1	none	hypothetical protein	none
COO91_11251	cluster2	cluster2	cluster2	cluster1	none	putative protein family Ycf35	none
COO91_08552	cluster2	cluster2	cluster2	cluster1	none	hypothetical protein	none
COO91_02267	cluster2	cluster2	cluster2	cluster1	none	hypothetical protein	none
COO91_00599	cluster2	cluster2	cluster2	cluster1	none	hypothetical protein	none
COO91_06353	cluster2	cluster2	cluster2	cluster1	none	hypothetical protein	none
COO91_00216	cluster2	cluster2	cluster2	cluster1	none	Protein of unknown function DUF2891	none
COO91_03449	cluster2	cluster2	cluster2	cluster1	none	hypothetical protein	none
COO91_02076	cluster2	cluster2	cluster2	cluster1	none	hypothetical protein	none
COO91_08540	cluster2	cluster2	cluster2	cluster2	none	PEP-CTERM protein-sorting domain	none
COO91_09702	cluster2	cluster2	cluster2	cluster2	none	hypothetical protein	none
COO91_01376	cluster2	cluster2	cluster2	cluster2	none	Protein of unknown function DUF3102	none
COO91_08107	cluster2	cluster2	cluster2	cluster2	none	hypothetical protein	none
COO91_09819	cluster2	cluster2	cluster2	cluster2	none	hypothetical protein	none
COO91_02616	cluster2	cluster2	cluster2	cluster2	none	hypothetical protein	none
COO91_09988	cluster2	cluster2	cluster2	cluster2	none	hypothetical protein	none
COO91_10592	cluster2	cluster2	cluster2	cluster2	none	hypothetical protein	none
COO91_09698	cluster2	cluster2	cluster2	cluster2	none	hypothetical protein	none
COO91_09700	cluster2	cluster2	cluster2	cluster2	none	hypothetical protein	none
COO91_10665	cluster2	cluster2	cluster2	cluster2	none	Bacteriophage Mx8%2C p63%2C C-terminal	none
COO91_08108	cluster2	cluster2	cluster2	cluster2	none	hypothetical protein	none
COO91_07650	cluster2	cluster2	cluster2	cluster2	none	hypothetical protein	none
COO91_01790	cluster2	cluster2	cluster2	cluster2	none	hypothetical protein	none
COO91_10486	cluster2	cluster2	cluster2	cluster2	none	hypothetical protein	none
COO91_11051	cluster2	cluster2	cluster2	cluster2	none	hypothetical protein	none
COO91_08128	cluster2	cluster2	cluster2	cluster2	none	hypothetical protein	none
COO91_06890	cluster2	cluster2	cluster2	cluster2	none	hypothetical protein	none
COO91_01734	cluster2	cluster2	cluster2	cluster2	none	hypothetical protein	none
COO91_10548	cluster2	cluster2	cluster2	cluster2	none	hypothetical protein	none
COO91_08810	cluster2	cluster2	cluster2	cluster2	none	hypothetical protein	none
COO91_02498	cluster2	cluster2	cluster2	cluster2	none	hypothetical protein	none
COO91_06493	cluster2	cluster2	cluster2	cluster2	none	hypothetical protein	none
COO91_09210	cluster2	cluster2	cluster2	cluster2	none	hypothetical protein	none
COO91_08181	cluster2	cluster2	cluster2	cluster2	none	hypothetical protein	none
COO91_10356	cluster2	cluster2	cluster2	cluster2	none	hypothetical protein	none
COO91_08148	cluster2	cluster2	cluster2	cluster2	none	Ricin B%2C lectin domain	none
COO91_10369	cluster2	cluster2	cluster2	cluster2	none	Methyl-accepting chemotaxis protein	none
COO91_08283	cluster2	cluster2	cluster2	cluster2	none	hypothetical protein	none
COO91_03058	cluster2	cluster2	cluster2	cluster2	none	hypothetical protein	none
COO91_11018	cluster2	cluster2	cluster2	cluster2	none	Zn-dependent oligopeptidases	none
COO91_09632	cluster2	cluster2	cluster2	cluster2	none	Chromosome segregation ATPase-like	none
COO91_03450	cluster2	cluster2	cluster2	cluster2	none	hypothetical protein	none
COO91_09270	cluster2	cluster2	cluster2	cluster2	none	hypothetical protein	none
COO91_03437	cluster2	cluster2	cluster2	cluster2	none	SAM-dependent methyltransferase	none
COO91_09111	cluster2	cluster2	cluster2	cluster2	none	Primase%2C C-terminal 2	none
COO91_08403	cluster2	cluster2	cluster2	cluster2	none	hypothetical protein	none
COO91_01740	cluster2	cluster2	cluster2	cluster2	none	hypothetical protein	none
COO91_06181	cluster2	cluster2	cluster2	cluster2	none	hypothetical protein	none
COO91_08399	cluster2	cluster2	cluster2	cluster2	none	hypothetical protein	none
COO91_08134	cluster2	cluster2	cluster2	cluster2	none	hypothetical protein	none
COO91_03983	cluster2	cluster2	cluster2	cluster2	none	hypothetical protein	none
COO91_01106	cluster2	cluster2	cluster2	cluster2	none	hypothetical protein	none
COO91_07165	cluster2	cluster2	cluster2	cluster2	none	hypothetical protein	none
COO91_09630	cluster2	cluster2	cluster2	cluster2	none	hypothetical protein	none
COO91_09533	cluster2	cluster2	cluster2	cluster2	none	hypothetical protein	none
COO91_09567	cluster2	cluster2	cluster2	cluster2	none	hypothetical protein	none
COO91_00598	cluster2	cluster2	cluster2	cluster2	none	hypothetical protein	none
COO91_08129	cluster2	cluster2	cluster2	cluster2	none	Type 2 lantibiotic%2C leader peptide domain	none
COO91_08400	cluster2	cluster2	cluster2	cluster2	none	hypothetical protein	none
COO91_07821	cluster2	cluster2	cluster2	cluster2	none	hypothetical protein	none
COO91_07723	cluster2	cluster2	cluster2	cluster2	none	hypothetical protein	none
COO91_01814	cluster2	cluster2	cluster2	cluster2	none	hypothetical protein	none
COO91_10090	cluster2	cluster2	cluster2	cluster2	none	hypothetical protein	none
COO91_10550	cluster2	cluster2	cluster2	cluster2	none	hypothetical protein	none
COO91_11043	cluster2	cluster2	cluster2	cluster2	none	DNA-damage-inducible protein D	none
COO91_06140	cluster2	cluster2	cluster2	cluster2	none	hypothetical protein	none
COO91_04767	cluster2	cluster2	cluster2	cluster2	none	hypothetical protein	none
COO91_10373	cluster2	cluster2	cluster2	cluster2	none	hypothetical protein	none
COO91_06531	cluster2	cluster2	cluster2	cluster2	none	hypothetical protein	none
COO91_08027	cluster2	cluster2	cluster2	cluster2	none	hypothetical protein	none
COO91_00530	cluster2	cluster2	cluster2	cluster2	none	hypothetical protein	none
COO91_04814	cluster2	cluster2	cluster2	cluster2	none	Signal transduction histidine kinase	none
COO91_08250	cluster2	cluster2	cluster2	cluster2	none	hypothetical protein	none
COO91_10339	cluster2	cluster2	cluster2	cluster2	none	hypothetical protein	none
COO91_01460	cluster2	cluster2	cluster2	cluster2	none	hypothetical protein	none
COO91_06051	cluster2	cluster2	cluster2	cluster2	none	hypothetical protein	none
COO91_00431	cluster2	cluster2	cluster2	cluster2	none	hypothetical protein	none
COO91_07327	cluster2	cluster2	cluster2	cluster2	none	glycoside hydrolase	none
COO91_02175	cluster2	cluster2	cluster2	cluster2	none	hypothetical protein	none
COO91_07255	cluster2	cluster2	cluster2	cluster2	none	hypothetical protein	none
COO91_07318	cluster2	cluster2	cluster2	cluster2	none	Resolvase%2C HTH domain	none
COO91_06220	cluster2	cluster2	cluster2	cluster2	none	hypothetical protein	none
COO91_09556	cluster2	cluster2	cluster2	cluster2	none	hypothetical protein	none
COO91_08306	cluster2	cluster2	cluster2	cluster2	none	Bacteriophage T4%2C Gp19%2C tail tube	none
COO91_01891	cluster2	cluster2	cluster2	cluster2	none	hypothetical protein	none
COO91_06097	cluster2	cluster2	cluster2	cluster2	none	hypothetical protein	none
COO91_01009	cluster2	cluster2	cluster2	cluster2	none	hypothetical protein	none
COO91_11250	cluster2	cluster2	cluster2	cluster2	none	hypothetical protein	none
COO91_03683	cluster2	cluster2	cluster2	cluster2	none	hypothetical protein	none
COO91_08288	cluster2	cluster2	cluster2	cluster2	none	Squalene cyclase	none
COO91_01943	cluster2	cluster2	cluster2	cluster2	none	hypothetical protein	none
COO91_02632	cluster2	cluster2	cluster2	cluster2	none	hypothetical protein	none
COO91_05455	cluster2	cluster2	cluster2	cluster2	none	hypothetical protein	none
COO91_08281	cluster2	cluster2	cluster2	cluster2	none	hypothetical protein	none
COO91_06088	cluster2	cluster2	cluster2	cluster2	none	hypothetical protein	none
COO91_09115	cluster2	cluster2	cluster2	cluster2	none	hypothetical protein	none
COO91_10088	cluster2	cluster2	cluster2	cluster2	none	hypothetical protein	none
COO91_08305	cluster2	cluster2	cluster2	cluster2	none	Bacteriophage T4%2C Gp19%2C tail tube	none
COO91_00430	cluster2	cluster2	cluster2	cluster2	none	hypothetical protein	none
COO91_03331	cluster2	cluster2	cluster2	cluster2	none	CheY chemotaxis protein or a CheY-like REC	none
COO91_06432	cluster2	cluster2	cluster2	cluster2	none	hypothetical protein	none
COO91_05870	cluster2	cluster2	cluster2	cluster2	none	hypothetical protein	none
COO91_06753	cluster2	cluster2	cluster2	cluster2	none	hypothetical protein	none
COO91_08307	cluster2	cluster2	cluster2	cluster2	none	Glutamine synthetase adenylyltransferase	none
COO91_07160	cluster2	cluster2	cluster2	cluster2	none	hypothetical protein	none
COO91_08282	cluster2	cluster2	cluster2	cluster2	none	Site-specific recombinase XerD	none
COO91_10879	cluster2	cluster2	cluster2	cluster2	none	hypothetical protein	none
COO91_04687	cluster2	cluster2	cluster2	cluster2	none	hypothetical protein	none
COO91_09027	cluster2	cluster2	cluster2	cluster2	none	hypothetical protein	none
COO91_01797	cluster2	cluster2	cluster2	cluster2	none	hypothetical protein	none
COO91_06869	cluster2	cluster2	cluster2	cluster2	none	hypothetical protein	none
COO91_04686	cluster2	cluster2	cluster2	cluster2	none	hypothetical protein	none
COO91_09537	cluster2	cluster2	cluster2	cluster2	none	Lambda repressor-like%2C DNA-binding domain	none
COO91_09170	cluster2	cluster2	cluster2	cluster2	none	hypothetical protein	none
COO91_03822	cluster2	cluster2	cluster2	cluster2	none	hypothetical protein	none
COO91_03716	cluster2	cluster2	cluster2	cluster2	none	hypothetical protein	none
COO91_08233	cluster2	cluster2	cluster2	cluster2	none	Methyl-accepting chemotaxis protein	none
COO91_09697	cluster2	cluster2	cluster2	cluster2	none	hypothetical protein	none
COO91_10584	cluster2	cluster2	cluster2	cluster2	none	hypothetical protein	none
COO91_08963	cluster2	cluster2	cluster2	cluster2	none	hypothetical protein	none
COO91_00201	cluster2	cluster2	cluster2	cluster2	none	Circadian oscillating protein COP23	none
COO91_01610	cluster2	cluster2	cluster2	cluster2	none	hypothetical protein	none
COO91_00255	cluster2	cluster2	cluster2	cluster2	none	hypothetical protein	none
COO91_08249	cluster2	cluster2	cluster2	cluster2	none	hypothetical protein	none
COO91_10526	cluster2	cluster2	cluster2	cluster2	none	hypothetical protein	none
COO91_09633	cluster2	cluster2	cluster2	cluster2	none	hypothetical protein	none
COO91_08293	cluster2	cluster2	cluster2	cluster2	none	hypothetical protein	none
COO91_09694	cluster2	cluster2	cluster2	cluster2	none	hypothetical protein	none
COO91_01798	cluster2	cluster2	cluster2	cluster2	none	hypothetical protein	none
COO91_04350	cluster2	cluster2	cluster2	cluster2	none	hypothetical protein	none
COO91_09699	cluster2	cluster2	cluster2	cluster2	none	hypothetical protein	none
COO91_06587	cluster2	cluster2	cluster2	cluster2	none	hypothetical protein	none
COO91_08525	cluster2	cluster2	cluster2	cluster2	none	Hypothetical protein	none
COO91_10374	cluster2	cluster2	cluster2	cluster2	none	Methyl-accepting chemotaxis protein	none
COO91_01941	cluster2	cluster2	cluster2	cluster2	none	hypothetical protein	none
COO91_09269	cluster2	cluster2	cluster2	cluster2	none	hypothetical protein	none
COO91_03159	cluster2	cluster2	cluster2	cluster2	none	hypothetical protein	none
COO91_08074	cluster2	cluster2	cluster2	cluster2	none	hypothetical protein	none
COO91_03851	cluster2	cluster2	cluster2	cluster2	none	hypothetical protein	none
COO91_05833	cluster2	cluster2	cluster2	cluster2	none	hypothetical protein	none
COO91_04351	cluster2	cluster2	cluster2	cluster2	none	hypothetical protein	none
COO91_08246	cluster2	cluster2	cluster2	cluster2	none	ATPase involved in DNA repair	none
COO91_07601	cluster2	cluster2	cluster2	cluster2	none	ATPase involved in DNA repair	none
COO91_06261	cluster2	cluster2	cluster2	cluster2	none	ATPase involved in DNA repair	none
COO91_06090	cluster2	cluster2	cluster2	cluster2	none	hypothetical protein	none
COO91_06550	cluster2	cluster2	cluster2	cluster2	none	hypothetical protein	none
COO91_02589	cluster2	cluster2	cluster2	cluster2	none	hypothetical protein	none
COO91_00410	cluster2	cluster2	cluster2	cluster2	none	hypothetical protein	none
COO91_08680	cluster2	cluster2	cluster2	cluster2	none	hypothetical protein	none
COO91_06584	cluster2	cluster2	cluster2	cluster2	none	hypothetical protein	none
COO91_09559	cluster2	cluster2	cluster2	cluster2	none	hypothetical protein	none
COO91_06562	cluster2	cluster2	cluster2	cluster2	none	hypothetical protein	none
COO91_07409	cluster2	cluster2	cluster2	cluster2	none	hypothetical protein	none
COO91_04345	cluster2	cluster2	cluster2	cluster2	none	hypothetical protein	none
COO91_03124	cluster2	cluster2	cluster2	cluster2	none	Protease inhibitor I10%2C marinostatin	none
COO91_06283	cluster2	cluster2	cluster2	cluster2	none	hypothetical protein	none
COO91_07048	cluster2	cluster2	cluster2	cluster2	none	RNA:NAD 2'-phosphotransferase	none
COO91_05945	cluster2	cluster2	cluster2	cluster2	none	Protein of unknown function DUF2808	none
COO91_09984	cluster2	cluster2	cluster2	cluster2	none	hypothetical protein	none
COO91_04073	cluster2	cluster2	cluster2	cluster2	none	hypothetical protein	none
COO91_06072	cluster2	cluster2	cluster2	cluster2	none	hypothetical protein	none
COO91_08219	cluster2	cluster2	cluster2	cluster2	none	hypothetical protein	none
COO91_01982	cluster2	cluster2	cluster2	cluster2	none	hypothetical protein	none
COO91_04863	cluster2	cluster2	cluster2	cluster2	none	hypothetical protein	none
COO91_09146	cluster2	cluster2	cluster2	cluster2	none	hypothetical protein	none
COO91_10696	cluster2	cluster2	cluster2	cluster2	none	hypothetical protein	none
COO91_11127	cluster2	cluster2	cluster2	cluster2	none	hypothetical protein	none
COO91_00538	cluster2	cluster2	cluster2	cluster2	none	hypothetical protein	none
COO91_00032	cluster2	cluster2	cluster2	cluster2	none	hypothetical protein	none
COO91_00093	cluster2	cluster2	cluster2	cluster2	none	hypothetical protein	none
COO91_06315	cluster2	cluster2	cluster2	cluster2	none	hypothetical protein	none
COO91_06359	cluster2	cluster2	cluster2	cluster2	none	hypothetical protein	none
COO91_06648	cluster2	cluster2	cluster2	cluster2	none	Protein of unknown function DUF3318	none
COO91_10988	cluster2	cluster2	cluster2	cluster2	none	hypothetical protein	none
COO91_09110	cluster2	cluster2	cluster2	cluster2	none	hypothetical protein	none
COO91_04187	cluster2	cluster2	cluster2	cluster2	none	protein of unknown function DUF4168	none
COO91_08245	cluster2	cluster2	cluster2	cluster2	none	Methyl-accepting chemotaxis protein	none
COO91_08130	cluster2	cluster2	cluster2	cluster2	none	hypothetical protein	none
COO91_08402	cluster2	cluster2	cluster2	cluster2	none	Pyruvate/2-oxoglutarate dehydrogenase complex	none
COO91_10361	cluster2	cluster2	cluster2	cluster2	none	ATPase involved in DNA repair	none
COO91_08520	cluster2	cluster2	cluster2	cluster2	none	hypothetical protein	none
COO91_02686	cluster2	cluster2	cluster2	cluster2	none	hypothetical protein	none
COO91_01559	cluster2	cluster2	cluster2	cluster2	none	hypothetical protein	none
COO91_07840	cluster2	cluster2	cluster2	cluster2	none	hypothetical protein	none
COO91_07317	cluster2	cluster2	cluster2	cluster2	none	hypothetical protein	none
COO91_04364	cluster2	cluster2	cluster2	cluster2	none	hypothetical protein	none
COO91_10345	cluster2	cluster2	cluster2	cluster2	none	hypothetical protein	none
COO91_10246	cluster2	cluster2	cluster2	cluster2	none	hypothetical protein	none
COO91_04469	cluster2	cluster2	cluster2	cluster2	none	hypothetical protein	none
COO91_08577	cluster2	cluster2	cluster2	cluster2	none	hypothetical protein	none
COO91_03966	cluster2	cluster2	cluster2	cluster2	none	hypothetical protein	none
COO91_10581	cluster2	cluster2	cluster2	cluster2	none	hypothetical protein	none
COO91_05780	cluster2	cluster2	cluster2	cluster2	none	hypothetical protein	none
COO91_08935	cluster2	cluster2	cluster2	cluster2	none	hypothetical protein	none
COO91_06117	cluster2	cluster2	cluster2	cluster2	none	hypothetical protein	none
COO91_09260	cluster2	cluster2	cluster2	cluster2	none	hypothetical protein	none
COO91_09403	cluster2	cluster2	cluster2	cluster2	none	hypothetical protein	none
COO91_10223	cluster2	cluster2	cluster2	cluster2	none	hypothetical protein	none
COO91_10750	cluster2	cluster2	cluster2	cluster2	none	hypothetical protein	none
COO91_11233	cluster2	cluster2	cluster2	cluster2	none	hypothetical protein	none
COO91_01358	cluster2	cluster2	cluster2	cluster2	none	hypothetical protein	none
COO91_07276	cluster2	cluster2	cluster2	cluster2	none	hypothetical protein	none
COO91_10899	cluster2	cluster2	cluster2	cluster2	none	hypothetical protein	none
COO91_09539	cluster2	cluster2	cluster2	cluster2	none	hypothetical protein	none
COO91_07848	cluster2	cluster2	cluster2	cluster2	none	hypothetical protein	none
COO91_04710	cluster2	cluster2	cluster2	cluster2	none	hypothetical protein	none
COO91_01313	cluster2	cluster2	cluster2	cluster2	none	hypothetical protein	none
COO91_09540	cluster2	cluster2	cluster2	cluster2	none	hypothetical protein	none
COO91_07365	cluster2	cluster2	cluster2	cluster2	none	hypothetical protein	none
COO91_11234	cluster2	cluster2	cluster2	cluster2	none	hypothetical protein	none
COO91_10915	cluster2	cluster2	cluster2	cluster2	none	hypothetical protein	none
COO91_08258	cluster2	cluster2	cluster2	cluster2	none	hypothetical protein	none
COO91_10072	cluster2	cluster2	cluster2	cluster2	none	transposase	none
COO91_06729	cluster2	cluster2	cluster2	cluster2	none	hypothetical protein	none
COO91_03363	cluster2	cluster2	cluster2	cluster2	none	hypothetical protein	none
COO91_10582	cluster2	cluster2	cluster2	cluster2	none	hypothetical protein	none
COO91_07791	cluster2	cluster2	cluster2	cluster2	none	Cyanobacteria-specific protein containing UvrC-like endonuclease domain	none
COO91_06943	cluster2	cluster2	cluster2	cluster2	none	hypothetical protein	none
COO91_05489	cluster2	cluster2	cluster2	cluster2	none	hypothetical protein	none
COO91_00888	cluster2	cluster2	cluster2	cluster2	none	hypothetical protein	none
COO91_06913	cluster2	cluster2	cluster2	cluster2	none	hypothetical protein	none
COO91_00246	cluster2	cluster2	cluster2	cluster2	none	ABC.FEV.P%2C iron complex transport system permease protein	none
COO91_00750	cluster2	cluster2	cluster2	cluster2	none	hypothetical protein	none
COO91_07686	cluster2	cluster2	cluster2	cluster2	none	protein of unknown function DUF4082	none
COO91_09542	cluster2	cluster2	cluster2	cluster2	none	Pyruvate/2-oxoglutarate dehydrogenase complex	none
COO91_06107	cluster2	cluster2	cluster2	cluster2	none	hypothetical protein	none
COO91_08615	cluster2	cluster2	cluster2	cluster2	none	hypothetical protein	none
COO91_01430	cluster2	cluster2	cluster2	cluster2	none	hypothetical protein	none
COO91_03517	cluster2	cluster2	cluster2	cluster2	none	hypothetical protein	none
COO91_01612	cluster2	cluster2	cluster2	cluster2	none	hypothetical protein	none
COO91_08791	cluster2	cluster2	cluster2	cluster2	none	hypothetical protein	none
COO91_07628	cluster2	cluster2	cluster2	cluster2	none	hypothetical protein	none
COO91_01906	cluster2	cluster2	cluster2	cluster2	none	Glycosyltransferase involved in cell wall bisynthesis	none
COO91_06639	cluster2	cluster2	cluster2	cluster2	none	hypothetical protein	none
COO91_09524	cluster2	cluster2	cluster2	cluster2	none	hypothetical protein	none
COO91_09994	cluster2	cluster2	cluster2	cluster2	none	hypothetical protein	none
COO91_04971	cluster2	cluster2	cluster2	cluster2	none	hypothetical protein	none
COO91_09112	cluster2	cluster2	cluster2	cluster2	none	hypothetical protein	none
COO91_00320	cluster2	cluster2	cluster2	cluster2	none	hypothetical protein	none
COO91_02041	cluster2	cluster2	cluster2	cluster2	none	hypothetical protein	none
COO91_09422	cluster2	cluster2	cluster2	cluster2	none	hypothetical protein	none
COO91_01363	cluster2	cluster2	cluster2	cluster2	none	hypothetical protein	none
COO91_07206	cluster2	cluster2	cluster2	cluster2	none	hypothetical protein	none
COO91_10989	cluster2	cluster2	cluster2	cluster2	none	hypothetical protein	none
COO91_06841	cluster2	cluster2	cluster2	cluster2	none	hypothetical protein	none
COO91_10587	cluster2	cluster2	cluster2	cluster2	none	hypothetical protein	none
COO91_09989	cluster2	cluster2	cluster2	cluster2	none	hypothetical protein	none
COO91_03600	cluster2	cluster2	cluster2	cluster2	none	hypothetical protein	none
COO91_07302	cluster2	cluster2	cluster2	cluster2	none	hypothetical protein	none
COO91_05517	cluster2	cluster2	cluster2	cluster2	none	hypothetical protein	none
COO91_09538	cluster2	cluster2	cluster2	cluster2	none	hypothetical protein	none
COO91_08798	cluster2	cluster2	cluster2	cluster2	none	hypothetical protein	none
COO91_09707	cluster2	cluster2	cluster2	cluster2	none	Protein of unknown function DUF1392	none
COO91_06071	cluster2	cluster2	cluster2	cluster2	none	hypothetical protein	none
COO91_10583	cluster2	cluster2	cluster2	cluster2	none	hypothetical protein	none
COO91_01004	cluster2	cluster2	cluster2	cluster2	none	Mobile element protein	none
COO91_00022	cluster2	cluster2	cluster2	cluster2	none	hypothetical protein	none
COO91_00083	cluster2	cluster2	cluster2	cluster2	none	hypothetical protein	none
COO91_03657	cluster2	cluster2	cluster2	cluster2	none	hypothetical protein	none
COO91_06888	cluster2	cluster2	cluster2	cluster2	none	hypothetical protein	none
COO91_03790	cluster2	cluster2	cluster2	cluster2	none	hypothetical protein	none
COO91_09543	cluster2	cluster2	cluster2	cluster2	none	hypothetical protein	none
COO91_04151	cluster2	cluster2	cluster2	cluster2	none	hypothetical protein	none
COO91_06625	cluster2	cluster2	cluster2	cluster2	none	hypothetical protein	none
COO91_01938	cluster2	cluster2	cluster2	cluster2	none	hypothetical protein	none
COO91_09703	cluster2	cluster2	cluster2	cluster2	none	Periplasmic protein TonB%2C links inner and outer membranes	none
COO91_04002	cluster2	cluster2	cluster2	cluster2	none	Transcriptional regulator RutR of pyrimidine catabolism	none
COO91_10990	cluster2	cluster2	cluster2	cluster2	none	Pyruvate:ferredoxin oxidoreductase and related 2-oxoacid:ferredoxin oxidoreductases%2C beta subunit	none
COO91_08251	cluster2	cluster2	cluster2	cluster2	none	hypothetical protein	none
COO91_00573	cluster2	cluster2	cluster2	cluster2	none	hypothetical protein	none
COO91_01362	cluster2	cluster2	cluster2	cluster2	none	hypothetical protein	none
COO91_06264	cluster2	cluster2	cluster2	cluster2	none	hypothetical protein	none
COO91_00798	cluster2	cluster2	cluster2	cluster2	none	RNA:NAD 2'-phosphotransferase	none
COO91_05766	cluster2	cluster2	cluster2	cluster2	none	Cna B domain protein	none
COO91_05828	cluster2	cluster2	cluster2	cluster2	none	hypothetical protein	none
COO91_02742	cluster2	cluster2	cluster2	cluster2	none	hypothetical protein	none
COO91_00903	cluster2	cluster2	cluster2	cluster2	none	RNA:NAD 2'-phosphotransferase	none
COO91_01058	cluster2	cluster2	cluster2	cluster2	none	RNA:NAD 2'-phosphotransferase	none
COO91_05210	cluster2	cluster2	cluster2	cluster2	none	Ser/Gly rich%2C Cys interspersed	none
COO91_01262	cluster2	cluster2	cluster2	cluster2	none	RNA:NAD 2'-phosphotransferase	none
COO91_05950	cluster2	cluster2	cluster2	cluster2	none	hypothetical protein	none
COO91_06773	cluster2	cluster2	cluster2	cluster2	none	ATPase involved in DNA repair	none
COO91_01560	cluster2	cluster2	cluster2	cluster2	none	hypothetical protein	none
COO91_08237	cluster2	cluster2	cluster2	cluster2	none	hypothetical protein	none
COO91_07700	cluster2	cluster2	cluster2	cluster2	none	hypothetical protein	none
COO91_04986	cluster2	cluster2	cluster2	cluster2	none	hypothetical protein	none
COO91_08674	cluster2	cluster2	cluster2	cluster2	none	hypothetical protein	none
COO91_02510	cluster2	cluster2	cluster2	cluster2	none	hypothetical protein	none
COO91_07699	cluster2	cluster2	cluster2	cluster2	none	CopG-like ribbon-helix-helix domain	none
COO91_06963	cluster2	cluster2	cluster2	cluster2	none	hypothetical protein	none
COO91_09569	cluster2	cluster2	cluster2	cluster2	none	hypothetical protein	none
COO91_03805	cluster2	cluster2	cluster2	cluster2	none	putative nuclease%2C containings PIN domain%2C potential toxin-antitoxin system component	none
COO91_09597	cluster2	cluster2	cluster2	cluster2	none	RNA:NAD 2'-phosphotransferase	none
COO91_06142	cluster2	cluster2	cluster2	cluster2	none	ATPase involved in DNA repair	none
COO91_09982	cluster2	cluster2	cluster2	cluster2	none	hypothetical protein	none
COO91_09267	cluster2	cluster2	cluster2	cluster2	none	ATPase involved in DNA repair	none
COO91_01957	cluster2	cluster2	cluster2	cluster2	none	hypothetical protein	none
COO91_08893	cluster2	cluster2	cluster2	cluster2	none	RNA:NAD 2'-phosphotransferase	none
COO91_05999	cluster2	cluster2	cluster2	cluster2	none	hypothetical protein	none
COO91_10995	cluster2	cluster2	cluster2	cluster2	none	hypothetical protein	none
COO91_05515	cluster2	cluster2	cluster2	cluster3	none	hypothetical protein	none
COO91_07828	cluster2	cluster2	cluster2	cluster3	none	hypothetical protein	none
COO91_08310	cluster2	cluster2	cluster2	cluster3	none	Methyl-accepting chemotaxis protein	none
COO91_08638	cluster2	cluster2	cluster2	cluster3	none	hypothetical protein	none
COO91_02726	cluster2	cluster2	cluster2	cluster3	none	PEP-CTERM protein-sorting domain	none
COO91_06316	cluster2	cluster2	cluster2	cluster3	none	hypothetical protein	none
COO91_08284	cluster2	cluster2	cluster2	cluster3	none	hypothetical protein	none
COO91_08280	cluster2	cluster2	cluster2	cluster3	none	hypothetical protein	none
COO91_01002	cluster2	cluster2	cluster2	cluster3	none	hypothetical protein	none
COO91_02021	cluster2	cluster2	cluster2	cluster3	none	hypothetical protein	none
COO91_10586	cluster2	cluster2	cluster2	cluster3	none	ATPase involved in DNA repair	none
COO91_07680	cluster2	cluster2	cluster2	cluster3	none	hypothetical protein	none
COO91_10799	cluster2	cluster2	cluster2	cluster3	none	hypothetical protein	none
COO91_09285	cluster2	cluster2	cluster2	cluster3	none	hypothetical protein	none
COO91_08253	cluster2	cluster2	cluster2	cluster3	none	hypothetical protein	none
COO91_07155	cluster2	cluster2	cluster2	cluster3	none	hypothetical protein	none
COO91_01570	cluster2	cluster2	cluster2	cluster3	none	hypothetical protein	none
COO91_08022	cluster2	cluster2	cluster2	cluster3	none	hypothetical protein	none
COO91_08257	cluster2	cluster2	cluster2	cluster3	none	hypothetical protein	none
COO91_10753	cluster2	cluster2	cluster2	cluster3	none	hypothetical protein	none
COO91_01360	cluster2	cluster2	cluster2	cluster3	none	hypothetical protein	none
COO91_10150	cluster2	cluster2	cluster2	cluster3	none	hypothetical protein	none
COO91_03646	cluster2	cluster2	cluster2	cluster3	none	hypothetical protein	none
COO91_08287	cluster2	cluster2	cluster2	cluster3	none	hypothetical protein	none
COO91_07043	cluster2	cluster2	cluster2	cluster3	none	hypothetical protein	none
COO91_10669	cluster2	cluster2	cluster2	cluster3	none	hypothetical protein	none
COO91_08410	cluster2	cluster2	cluster2	cluster3	none	hypothetical protein	none
COO91_10692	cluster2	cluster2	cluster2	cluster3	none	Pyruvate/2-oxoglutarate dehydrogenase complex	none
COO91_01866	cluster2	cluster2	cluster2	cluster3	none	hypothetical protein	none
COO91_08797	cluster2	cluster2	cluster2	cluster3	none	hypothetical protein	none
COO91_09553	cluster2	cluster2	cluster2	cluster3	none	hypothetical protein	none
COO91_09483	cluster2	cluster2	cluster2	cluster3	none	hypothetical protein	none
COO91_10749	cluster2	cluster2	cluster2	cluster3	none	Putative DNA-binding domain	none
COO91_02774	cluster2	cluster2	cluster2	cluster3	none	hypothetical protein	none
COO91_08030	cluster2	cluster2	cluster2	cluster3	none	hypothetical protein	none
COO91_03257	cluster2	cluster2	cluster2	cluster3	none	hypothetical protein	none
COO91_06880	cluster2	cluster2	cluster2	cluster3	none	hypothetical protein	none
COO91_04003	cluster2	cluster2	cluster2	cluster3	none	hypothetical protein	none
COO91_04744	cluster2	cluster2	cluster2	cluster3	none	hypothetical protein	none
COO91_05470	cluster2	cluster2	cluster2	cluster3	none	hypothetical protein	none
COO91_10066	cluster2	cluster2	cluster2	cluster3	none	transposase	none
COO91_06567	cluster2	cluster2	cluster2	cluster3	none	hypothetical protein	none
COO91_03668	cluster2	cluster2	cluster2	cluster3	none	hypothetical protein	none
COO91_09439	cluster2	cluster2	cluster2	cluster3	none	Pyruvate:ferredoxin oxidoreductase and related 2-oxoacid:ferredoxin oxidoreductases%2C beta subunit	none
COO91_00457	cluster2	cluster2	cluster2	cluster3	none	hypothetical protein	none
COO91_09202	cluster2	cluster2	cluster2	cluster3	none	hypothetical protein	none
COO91_01316	cluster2	cluster2	cluster2	cluster3	none	hypothetical protein	none
COO91_09273	cluster2	cluster2	cluster2	cluster3	none	hypothetical protein	none
COO91_09638	cluster2	cluster2	cluster2	cluster3	none	hypothetical protein	none
COO91_00459	cluster2	cluster2	cluster2	cluster3	none	hypothetical protein	none
COO91_09419	cluster2	cluster2	cluster2	cluster3	none	hypothetical protein	none
COO91_03556	cluster2	cluster2	cluster2	cluster4	none	hypothetical protein	none
COO91_00797	cluster2	cluster2	cluster2	cluster4	none	hypothetical protein	none
COO91_01609	cluster2	cluster2	cluster2	cluster4	none	hypothetical protein	none
COO91_01527	cluster2	cluster2	cluster2	cluster4	none	hypothetical protein	none
COO91_06252	cluster2	cluster2	cluster2	cluster4	none	ATPase involved in DNA repair	none
COO91_03063	cluster2	cluster2	cluster2	cluster4	none	hypothetical protein	none
COO91_03750	cluster2	cluster2	cluster2	cluster4	none	hypothetical protein	none
COO91_07881	cluster2	cluster2	cluster2	cluster4	none	Six-bladed beta-propeller%2C TolB-like	none
COO91_06537	cluster2	cluster2	cluster2	cluster2	PSRP3	30S ribosomal protein 3	none
COO91_06891	cluster2	cluster2	cluster2	cluster2	trxB	thioredoxin reductase (NADPH) [EC:1.8.1.9]	Nucleosides and Nucleotides
COO91_08962	cluster2	cluster2	cluster2	cluster2	ENDOG	endonuclease G, mitochondrial	Nucleotide transport and metabolism
COO91_04834	cluster2	cluster2	cluster2	cluster2	none	Adenylate kinase or related kinase	Nucleotide transport and metabolism
COO91_03879	cluster2	cluster2	cluster2	cluster2	ndhD2a	NADH dehydrogenase subunit 4	Oxidative phosphorylation
COO91_02035	cluster2	cluster2	cluster2	cluster2	none	Phage terminase large subunit	Phages, Prophages, Transposable elements, Plasmids
COO91_05872	cluster2	cluster2	cluster2	cluster2	aroB	3-dehydroquinate synthase [EC:4.2.3.4]	Phenylalanine, tyrosine and tryptophan biosynthesis
COO91_00780	cluster2	cluster2	cluster2	cluster2	tyrA	chorismate mutase / prephenate dehydrogenase [EC:5.4.99.5 1.3.1.12]	Phenylalanine, tyrosine and tryptophan biosynthesis
COO91_07320	cluster2	cluster2	cluster2	cluster2	pstS	phosphate transport system substrate-binding protein	Phosphorus Metabolism
COO91_02783	cluster2	cluster2	cluster2	cluster2	none	Phycoerythrin linker protein CpeS	Photosynthesis
COO91_01509	cluster2	cluster2	cluster2	cluster2	cpcF	phycocyanin alpha subunit phycocyanobilin lyase, CpcF subunit	Photosynthesis-antenna proteins
COO91_05393	cluster2	cluster2	cluster2	cluster1	cpeR	phycoerythrin-associated linker protein	Photosynthesis-antenna proteins
COO91_07046	cluster2	cluster2	cluster2	cluster2	cbiD	cobalt-precorrin-5B (C1)-methyltransferase [EC:2.1.1.195]	Porphyrin and chlorophyll metabolism
COO91_06421	cluster2	cluster2	cluster2	cluster2	chlG	chlorophyll synthase [EC:2.5.1.62]	Porphyrin and chlorophyll metabolism
COO91_11139	cluster2	cluster2	cluster2	cluster2	hemE	uroporphyrinogen decarboxylase [EC:4.1.1.37]	Porphyrin and chlorophyll metabolism
COO91_00440	cluster2	cluster2	cluster2	cluster2	Deg1	Periplasmic serine protease, S1-C subfamily, contain C-terminal PDZ domain	Posttranslational modification, protein turnover, chaperones
COO91_03667	cluster2	cluster2	cluster2	cluster2	none	Zn-dependent protease	Posttranslational modification, protein turnover, chaperones
COO91_00439	cluster2	cluster2	cluster2	cluster2	none	Periplasmic serine protease%2C S1-C subfamily%2C containing C-terminal PDZ domain	Posttranslational modification, protein turnover, chaperones
COO91_03684	cluster2	cluster2	cluster2	cluster2	none	Cytochrome c peroxidase	Posttranslational modification, protein turnover, chaperones
COO91_09981	cluster2	cluster2	cluster2	cluster2	none	Molecular chaperone DnaK	Posttranslational modification, protein turnover, chaperones
COO91_05390	cluster2	cluster2	cluster2	cluster2	none	Periplasmic serine protease	Posttranslational modification, protein turnover, chaperones
COO91_09993	cluster2	cluster2	cluster2	cluster2	none	Molecular chaperone DnaK	Posttranslational modification, protein turnover, chaperones
COO91_09108	cluster2	cluster2	cluster2	cluster2	none	Molecular chaperone DnaK	Posttranslational modification, protein turnover, chaperones
COO91_09203	cluster2	cluster2	cluster2	cluster3	none	Molecular chaperone DnaK	Posttranslational modification, protein turnover, chaperones
COO91_06035	cluster2	cluster2	cluster2	cluster2	ccdA	cytochrome c-type biogenesis protein	Protein Metabolism
COO91_06170	cluster2	cluster2	cluster2	cluster2	none	CheY chemotaxis protein or a CheY-like REC	Protein Metabolism
COO91_06267	cluster2	cluster2	cluster2	cluster2	obgE	GTPase [EC:3.6.5.-]	Protein Metabolism
COO91_03617	cluster2	cluster2	cluster2	cluster1	tsf	translation elongation factor Ts	Protein Metabolism
COO91_06615	cluster2	cluster2	cluster2	cluster2	rpoA	RNA polymerase alpha subunit	Purine metabolism
COO91_03993	cluster2	cluster2	cluster2	cluster2	rpoB	RNA polymerase beta subunit	Purine metabolism
COO91_03994	cluster2	cluster2	cluster2	cluster1	rpoC1	RNA polymerase gamma subunit	Purine metabolism
COO91_05563	cluster2	cluster2	cluster2	cluster2	LYS21	homocitrate synthase [EC:2.3.3.14]	Pyruvate metabolism
COO91_06185	cluster2	cluster2	cluster2	cluster2	higA	proteic killer suppression protein	Regulation and Cell signaling
COO91_08124	cluster2	cluster2	cluster2	cluster2	none	cAMP-binding domain of CRP or a regulatory subunit of cAMP-dependent protein kinases	Regulation and Cell signaling
COO91_06098	cluster2	cluster2	cluster2	cluster2	none	Extracellular	Regulation and Cell signaling
COO91_06184	cluster2	cluster2	cluster2	cluster2	none	Zn-dependent peptidase ImmA%2C M78 family	Regulation and Cell signaling
COO91_10240	cluster2	cluster2	cluster2	cluster2	none	Extracellular	Regulation and Cell signaling
COO91_01544	cluster2	cluster2	cluster2	cluster2	none	cAMP-binding domain of CRP or a regulatory subunit of cAMP-dependent protein kinases	Regulation and Cell signaling
COO91_01563	cluster2	cluster2	cluster2	cluster2	none	Anionic cell wall polymer biosynthesis enzyme%2C LytR-Cps2A-Psr	Regulation and Cell signaling
COO91_05832	cluster2	cluster2	cluster2	cluster2	none	DNA-binding transcriptional regulator%2C LysR family	Regulation and Cell signaling
COO91_10904	cluster2	cluster2	cluster2	cluster1	none	Alkylated DNA repair dioxygenase AlkB	Replication, recombination and repair
COO91_09757	cluster2	cluster2	cluster2	cluster2	none	DNA-binding transcriptional regulator%2C FadR family	Replication, recombination and repair
COO91_09701	cluster2	cluster2	cluster2	cluster2	none	Type I restriction-modification system%2C DNA methylase subunit	Replication, recombination and repair
COO91_09979	cluster2	cluster2	cluster2	cluster2	none	DNA-binding transcriptional regulator%2C FadR family	Replication, recombination and repair
COO91_09148	cluster2	cluster2	cluster2	cluster2	none	DNA-binding transcriptional regulator%2C FadR family	Replication, recombination and repair
COO91_01454	cluster2	cluster2	cluster2	cluster2	none	Archaeal DNA helicase HerA or a related bacterial ATPase%2C containings HAS-barrel and ATPase domains	Replication, recombination and repair
COO91_06235	cluster2	cluster2	cluster2	cluster2	none	putative transposase YdaD	Replication, recombination and repair
COO91_07816	cluster2	cluster2	cluster2	cluster2	none	Alkylated DNA repair dioxygenase AlkB	Replication, recombination and repair
COO91_09113	cluster2	cluster2	cluster2	cluster2	none	DNA-binding transcriptional regulator%2C FadR family	Replication, recombination and repair
COO91_07701	cluster2	cluster2	cluster2	cluster2	none	Site-specific DNA-cytosine methylase	Replication, recombination and repair
COO91_01308	cluster2	cluster2	cluster2	cluster3	none	Type I restriction-modification system%2C DNA methylase subunit	Replication, recombination and repair
COO91_10849	cluster2	cluster2	cluster2	cluster3	none	hypothetical protein	Replication, recombination and repair
COO91_02028	cluster2	cluster2	cluster2	cluster2	xerC	integrase/recombinase XerC	Replication, recombination and repair
COO91_09971	cluster2	cluster2	cluster2	cluster3	xerD	integrase/recombinase XerD	Replication, recombination and repair
COO91_05667	cluster2	cluster2	cluster2	cluster1	none	NAD-dependent dihydropyrimidine dehydrogenase%2C PreA subunit	Respiration
COO91_10203	cluster2	cluster2	cluster2	cluster2	none	Succinate dehydrogenase/fumarate reductase%2C flavoprotein subunit	Respiration
COO91_02794	cluster2	cluster2	cluster2	cluster2	rpl1	50S ribosomal protein L1	Ribosome
COO91_02796	cluster2	cluster2	cluster2	cluster2	rpl12	50S ribosomal protein L12	Ribosome
COO91_06618	cluster2	cluster2	cluster2	cluster1	rpl13	50S ribosomal protein L13	Ribosome
COO91_06600	cluster2	cluster2	cluster2	cluster1	rpl14	50S ribosomal protein L14	Ribosome
COO91_06597	cluster2	cluster2	cluster2	cluster2	rpl16	50S ribosomal protein L16	Ribosome
COO91_06616	cluster2	cluster2	cluster2	cluster2	rpl17	50S ribosomal protein L17	Ribosome
COO91_06605	cluster2	cluster2	cluster2	cluster2	rpl18	50S ribosomal protein L18	Ribosome
COO91_06593	cluster2	cluster2	cluster2	cluster2	rpl2	50S ribosomal protein L2	Ribosome
COO91_06595	cluster2	cluster2	cluster2	cluster1	rpl22	50S ribosomal protein L22	Ribosome
COO91_06591	cluster2	cluster2	cluster2	cluster1	rpl23	50S ribosomal protein L23	Ribosome
COO91_06598	cluster2	cluster2	cluster2	cluster1	rpl29	50S ribosomal protein L29	Ribosome
COO91_06589	cluster2	cluster2	cluster2	cluster1	rpl3	50S ribosomal protein L3	Ribosome
COO91_06590	cluster2	cluster2	cluster2	cluster2	rpl4	50S ribosomal protein L4	Ribosome
COO91_06604	cluster2	cluster2	cluster2	cluster2	rpl6	50S ribosomal protein L6	Ribosome
COO91_06613	cluster2	cluster2	cluster2	cluster2	rps11	30S ribosomal protein S11	Ribosome
COO91_06599	cluster2	cluster2	cluster2	cluster2	rps17	30S ribosomal protein S17	Ribosome
COO91_06596	cluster2	cluster2	cluster2	cluster1	rps3	30S ribosomal protein S3	Ribosome
COO91_06606	cluster2	cluster2	cluster2	cluster2	rps5	30S ribosomal protein S5	Ribosome
COO91_04525	cluster2	cluster2	cluster2	cluster2	rps7	30S ribosomal protein S7	Ribosome
COO91_06603	cluster2	cluster2	cluster2	cluster2	rps8	30S ribosomal protein S8	Ribosome
COO91_06619	cluster2	cluster2	cluster2	cluster2	rps9	30S ribosomal protein S9	Ribosome
COO91_06429	cluster2	cluster2	cluster2	cluster2	deaD	ATP-dependent RNA helicase DeaD [EC:3.6.4.13]	RNA degradation
COO91_01382	cluster2	cluster2	cluster2	cluster2	E2.7.7.49	RNA-directed DNA polymerase [EC:2.7.7.49]	RNA Metabolism
COO91_05948	cluster2	cluster2	cluster2	cluster2	none	RNase P protein component	RNA Metabolism
COO91_07138	cluster2	cluster2	cluster2	cluster2	rlmB	23S rRNA (guanosine2251-2'-O)-methyltransferase [EC:2.1.1.185]	RNA Metabolism
COO91_03511	cluster2	cluster2	cluster2	cluster2	rnc	ribonuclease III [EC:3.1.26.3]	RNA Metabolism
COO91_07162	cluster2	cluster2	cluster2	cluster3	SIG2	RNA polymerase nonessential primary-like sigma factor	RNA Metabolism
COO91_06617	cluster2	cluster2	cluster2	cluster2	truA	tRNA pseudouridine38-40 synthase [EC:5.4.99.12]	RNA Metabolism
COO91_04743	cluster2	cluster2	cluster2	cluster3	none	hypothetical protein	RNA processing and modification
COO91_06032	cluster2	cluster2	cluster2	cluster1	none	putative ATP-dependent carboligase%2C ATP-grasp superfamily	Secondary Metabolism
COO91_08127	cluster2	cluster2	cluster2	cluster2	none	Lantibiotic modifying enzyme	Secondary Metabolism
COO91_10487	cluster2	cluster2	cluster2	cluster2	none	Ca2+-binding protein%2C RTX toxin-related	Secondary metabolites biosynthesis, transport and catabolism
COO91_11050	cluster2	cluster2	cluster2	cluster2	none	Ca2+-binding protein%2C RTX toxin-related	Secondary metabolites biosynthesis, transport and catabolism
COO91_10224	cluster2	cluster2	cluster2	cluster2	none	Non-ribosomal peptide synthetase component F	Secondary metabolites biosynthesis, transport and catabolism
COO91_07166	cluster2	cluster2	cluster2	cluster2	none	Murein DD-endopeptidase MepM and murein hydrolase activator NlpD%2C containing LysM domain	Secondary metabolites biosynthesis, transport and catabolism
COO91_01739	cluster2	cluster2	cluster2	cluster2	none	hypothetical protein	Secondary metabolites biosynthesis, transport and catabolism
COO91_06167	cluster2	cluster2	cluster2	cluster2	none	Ca2+-binding protein%2C RTX toxin-related	Secondary metabolites biosynthesis, transport and catabolism
COO91_00322	cluster2	cluster2	cluster2	cluster2	none	Ca2+-binding protein%2C RTX toxin-related	Secondary metabolites biosynthesis, transport and catabolism
COO91_03743	cluster2	cluster2	cluster2	cluster2	none	Ca2+-binding protein%2C RTX toxin-related	Secondary metabolites biosynthesis, transport and catabolism
COO91_01369	cluster2	cluster2	cluster2	cluster2	none	Non-ribosomal peptide synthetase component F	Secondary metabolites biosynthesis, transport and catabolism
COO91_02951	cluster2	cluster2	cluster2	cluster3	none	Ca2+-binding protein%2C RTX toxin-related	Secondary metabolites biosynthesis, transport and catabolism
COO91_05371	cluster2	cluster2	cluster2	cluster2	none	cAMP-binding domain of CRP or a regulatory subunit of cAMP-dependent protein kinases	Signal transduction mechanisms
COO91_07419	cluster2	cluster2	cluster2	cluster2	none	Fermentation-respiration switch protein FrsA%2C has esterase activity%2C DUF1100 family	Signal transduction mechanisms
COO91_08126	cluster2	cluster2	cluster2	cluster2	none	Signal transduction histidine kinase regulating C4-dicarboxylate transport system	Signal transduction mechanisms
COO91_08294	cluster2	cluster2	cluster2	cluster2	none	Forkhead associated	Signal transduction mechanisms
COO91_06049	cluster2	cluster2	cluster2	cluster2	none	Fermentation-respiration switch protein FrsA%2C has esterase activity%2C DUF1100 family	Signal transduction mechanisms
COO91_00163	cluster2	cluster2	cluster2	cluster2	none	Signal transduction histidine kinase%2C nitrate/nitrite-specific	Signal transduction mechanisms
COO91_06939	cluster2	cluster2	cluster2	cluster2	none	Serine/threonine protein kinase	Signal transduction mechanisms
COO91_04737	cluster2	cluster2	cluster2	cluster2	ancrpB	transcriptional regulator	Stress Response
COO91_03821	cluster2	cluster2	cluster2	cluster2	dps	starvation-inducible DNA-binding protein	Stress Response
COO91_05059	cluster2	cluster2	cluster2	cluster2	none	Glutathione S-transferase	Stress Response
COO91_05058	cluster2	cluster2	cluster2	cluster2	none	Peroxiredoxin	Stress Response
COO91_01587	cluster2	cluster2	cluster2	cluster2	none	Glycerol uptake facilitator and related aquaporins	Stress Response
COO91_05122	cluster2	cluster2	cluster2	cluster2	none	Alkyl hydroperoxide reductase subunit AhpC	Stress Response
COO91_05057	cluster2	cluster2	cluster2	cluster2	PRDX2_4	peroxiredoxin (alkyl hydroperoxide reductase subunit C) [EC:1.11.1.15]	Stress Response
COO91_01624	cluster2	cluster2	cluster2	cluster2	rsbW	serine/threonine-protein kinase RsbW [EC:2.7.11.1]	Stress Response
COO91_06382	cluster2	cluster2	cluster2	cluster2	cysK	cysteine synthase A [EC:2.5.1.47]	Sulfur metabolism
COO91_01538	cluster2	cluster2	cluster2	cluster3	cysU	sulfate transport system permease protein	Sulfur metabolism
COO91_03163	cluster2	cluster2	cluster2	cluster2	none	hypothetical protein	Sulfur Metabolism
COO91_08522	cluster2	cluster2	cluster2	cluster2	sfnG	FMNH2-dependent dimethyl sulfone monooxygenase	Sulfur metabolism
COO91_08780	cluster2	cluster2	cluster2	cluster2	ssuA	sulfonate transport system substrate-binding protein	Sulfur metabolism
COO91_08524	cluster2	cluster2	cluster2	cluster2	tauD	taurine dioxygenase [EC:1.14.11.17]	Sulfur metabolism
COO91_01276	cluster2	cluster2	cluster2	cluster2	ispE	4-diphosphocytidyl-2-C-methyl-D-erythritol kinase [EC:2.7.1.148]	Terpenoid backbone biosynthesis
COO91_05395	cluster2	cluster2	cluster2	cluster2	ndoAI	CopG family transcriptional regulator / antitoxin EndoAI	Transcription
COO91_01483	cluster2	cluster2	cluster2	cluster1	none	DNA-binding transcriptional regulator%2C XRE family	Transcription
COO91_10697	cluster2	cluster2	cluster2	cluster1	none	Transcriptional regulator%2C containings XRE-family HTH domain	Transcription
COO91_08135	cluster2	cluster2	cluster2	cluster2	none	DNA-directed RNA polymerase specialized sigma subunit%2C sigma24 family	Transcription
COO91_05045	cluster2	cluster2	cluster2	cluster2	none	putative transcriptional regulator	Transcription
COO91_08119	cluster2	cluster2	cluster2	cluster2	none	DNA-binding response regulator%2C OmpR family%2C containings REC and winged-helix	Transcription
COO91_10238	cluster2	cluster2	cluster2	cluster2	none	DNA-directed RNA polymerase specialized sigma subunit%2C sigma24 family	Transcription
COO91_00438	cluster2	cluster2	cluster2	cluster2	none	DNA-binding response regulator%2C NarL/FixJ family%2C containings REC and HTH domains	Transcription
COO91_02494	cluster2	cluster2	cluster2	cluster2	none	DNA-binding response regulator%2C OmpR family%2C containings REC and winged-helix	Transcription
COO91_04815	cluster2	cluster2	cluster2	cluster2	none	DNA-directed RNA polymerase specialized sigma subunit%2C sigma24 family	Transcription
COO91_06094	cluster2	cluster2	cluster2	cluster2	none	DNA-directed RNA polymerase specialized sigma subunit%2C sigma24 family	Transcription
COO91_08311	cluster2	cluster2	cluster2	cluster2	none	DNA-directed RNA polymerase specialized sigma subunit	Transcription
COO91_08631	cluster2	cluster2	cluster2	cluster2	none	DNA-binding response regulator%2C OmpR family%2C containings REC and winged-helix	Transcription
COO91_07042	cluster2	cluster2	cluster2	cluster2	none	DNA-binding response regulator%2C OmpR family%2C containings REC and winged-helix	Transcription
COO91_08604	cluster2	cluster2	cluster2	cluster2	none	WGR domain%2C putative DNA-binding domain in MolR	Transcription
COO91_10476	cluster2	cluster2	cluster2	cluster3	none	Superfamily II DNA or RNA helicase%2C SNF2 family	Transcription
COO91_07316	cluster2	cluster2	cluster2	cluster2	pspA	phage shock protein A	Transcription
COO91_10319	cluster2	cluster2	cluster2	cluster2	none	Protein N-acetyltransferase%2C RimJ/RimL family	Translation, ribosomal structure and biogenesis
COO91_01107	cluster2	cluster2	cluster2	cluster2	none	Glutathione synthase/RimK-type ligase%2C ATP-grasp superfamily	Translation, ribosomal structure and biogenesis
COO91_07820	cluster2	cluster2	cluster2	cluster2	none	Glutathione synthase/RimK-type ligase%2C ATP-grasp superfamily	Translation, ribosomal structure and biogenesis
COO91_11264	cluster2	cluster2	cluster2	cluster2	none	Protein N-acetyltransferase%2C RimJ/RimL family	Translation, ribosomal structure and biogenesis
COO91_05185	cluster2	cluster2	cluster2	cluster2	none	Ribosomal protein S18 acetylase RimI and related acetyltransferases	Translation, ribosomal structure and biogenesis
COO91_03123	cluster2	cluster2	cluster2	cluster2	none	Glutathione synthase/RimK-type ligase%2C ATP-grasp superfamily	Translation, ribosomal structure and biogenesis
COO91_07167	cluster2	cluster2	cluster2	cluster2	none	Ribosomal protein S18 acetylase RimI and related acetyltransferases	Translation, ribosomal structure and biogenesis
COO91_08652	cluster2	cluster2	cluster2	cluster2	none	RNA:NAD 2'-phosphotransferase%2C TPT1/KptA family	Translation, ribosomal structure and biogenesis
COO91_05949	cluster2	cluster2	cluster2	cluster2	none	RNase P protein component	Translation, ribosomal structure and biogenesis
COO91_07789	cluster2	cluster2	cluster2	cluster3	none	putative acetyltransferase%2C GNAT family	Translation, ribosomal structure and biogenesis
COO91_06253	cluster2	cluster2	cluster2	cluster2	pixJ	methyl-accepting chemotaxis protein PixJ	Two-component system
COO91_05868	cluster2	cluster2	cluster2	cluster2	ubiA	4-hydroxybenzoate polyprenyltransferase [EC:2.5.1.39]	Ubiquinone and other terpenoid-quinone biosynthesis
COO91_06420	cluster2	cluster2	cluster2	cluster2	arsA	arsenite-transporting ATPase [EC:3.6.3.16]	Virulence, Disease and Defense
COO91_03234	cluster2	cluster2	cluster2	cluster2	ATOX1	copper chaperone	Virulence, Disease and Defense
COO91_03233	cluster2	cluster2	cluster2	cluster2	copA	Cu+-exporting ATPase [EC:3.6.3.54]	Virulence, Disease and Defense
COO91_05357	cluster2	cluster2	cluster2	cluster2	none	Putative silver efflux pump	Virulence, Disease and Defense
COO91_06324	cluster2	cluster2	cluster2	cluster2	none	Phosphoribosyl 1%2C2-cyclic phosphodiesterase	Virulence, Disease and Defense
COO91_08717	cluster2	cluster2	cluster2	cluster2	none	Multidrug efflux pump subunit AcrB	Virulence, Disease and Defense
COO91_02358	cluster2	cluster2	cluster2	cluster2	none	Na+/H+ antiporter NhaD or related arsenite permease	Virulence, Disease and Defense
COO91_00347	cluster2	cluster3	cluster2	cluster2	none	Acireductone dioxygenase	Amino Acids and Derivatives
COO91_01260	cluster2	cluster3	cluster2	cluster2	none	3-deoxy-D-arabino-heptulosonate 7-phosphate	Amino Acids and Derivatives
COO91_08527	cluster2	cluster3	cluster2	cluster2	nicE	maleate isomerase [EC:5.2.1.1]	Butanoate metabolism
COO91_06669	cluster2	cluster3	cluster2	cluster2	none	Polysaccharide pyruvyl transferase family protein WcaK	Cell wall/membrane/envelope biogenesis
COO91_04086	cluster2	cluster3	cluster2	cluster2	none	Hydroxymethylpyrimidine ABC transporter%2C ATPase component	Cofactors, Vitamins, Prosthetic Groups, Pigments
COO91_06446	cluster2	cluster3	cluster2	cluster2	none	Transposase	Cofactors, Vitamins, Prosthetic Groups, Pigments
COO91_01304	cluster2	cluster3	cluster2	cluster2	dnaB	replicative DNA helicase [EC:3.6.4.12]	DNA replication
COO91_10739	cluster2	cluster3	cluster2	cluster2	none	NADPH:qui reductase or related Zn-dependent oxidoreductase	Energy production and conversion
COO91_03736	cluster2	cluster3	cluster2	cluster2	none	Na+/H+-dicarboxylate symporter	Energy production and conversion
COO91_05893	cluster2	cluster3	cluster2	cluster2	none	putative membrane protein%2C DUF373 family	Function unknown
COO91_08131	cluster2	cluster3	cluster2	cluster2	none	Transposase	Mobilome: prophages, transposons
COO91_08613	cluster2	cluster3	cluster2	cluster2	none	IS4 transposase	Mobilome: prophages, transposons
COO91_08158	cluster2	cluster3	cluster2	cluster2	none	Essential recombination function protein	none
COO91_10153	cluster2	cluster3	cluster2	cluster2	none	hypothetical protein	none
COO91_05363	cluster2	cluster3	cluster2	cluster2	none	fdxN element excision controlling factor protein	none
COO91_05956	cluster2	cluster3	cluster2	cluster2	none	hypothetical protein	none
COO91_09421	cluster2	cluster3	cluster2	cluster2	none	hypothetical protein	none
COO91_09169	cluster2	cluster3	cluster2	cluster2	none	hypothetical protein	none
COO91_09168	cluster2	cluster3	cluster2	cluster2	none	hypothetical protein	none
COO91_08320	cluster2	cluster3	cluster2	cluster2	none	hypothetical protein	none
COO91_08685	cluster2	cluster3	cluster2	cluster2	none	hypothetical protein	none
COO91_05882	cluster2	cluster3	cluster2	cluster2	none	hypothetical protein	none
COO91_09657	cluster2	cluster3	cluster2	cluster2	none	hypothetical protein	none
COO91_10919	cluster2	cluster3	cluster2	cluster2	none	hypothetical protein	none
COO91_00177	cluster2	cluster3	cluster2	cluster2	none	hypothetical protein	none
COO91_00703	cluster2	cluster3	cluster2	cluster2	none	hypothetical protein	none
COO91_06482	cluster2	cluster3	cluster2	cluster2	none	hypothetical protein	none
COO91_02059	cluster2	cluster3	cluster2	cluster2	none	hypothetical protein	none
COO91_03815	cluster2	cluster3	cluster2	cluster2	none	hypothetical protein	none
COO91_10202	cluster2	cluster3	cluster2	cluster2	none	hypothetical protein	none
COO91_06257	cluster2	cluster3	cluster2	cluster2	none	putative restriction /modification enzyme	none
COO91_06887	cluster2	cluster3	cluster2	cluster2	none	hypothetical protein	none
COO91_02401	cluster2	cluster3	cluster2	cluster2	none	hypothetical protein	none
COO91_08011	cluster2	cluster3	cluster2	cluster2	none	hypothetical protein	none
COO91_01775	cluster2	cluster3	cluster2	cluster2	none	hypothetical protein	none
COO91_01231	cluster2	cluster3	cluster2	cluster2	none	hypothetical protein	none
COO91_02173	cluster2	cluster3	cluster2	cluster2	none	hypothetical protein	none
COO91_10961	cluster2	cluster3	cluster2	cluster2	none	Methyl-accepting chemotaxis protein	none
COO91_01268	cluster2	cluster3	cluster2	cluster2	none	hypothetical protein	none
COO91_10951	cluster2	cluster3	cluster2	cluster2	none	hypothetical protein	none
COO91_04257	cluster2	cluster3	cluster2	cluster2	none	hypothetical protein	none
COO91_10991	cluster2	cluster3	cluster2	cluster2	none	hypothetical protein	none
COO91_07129	cluster2	cluster3	cluster2	cluster2	none	hypothetical protein	none
COO91_08044	cluster2	cluster3	cluster2	cluster2	none	hypothetical protein	none
COO91_02029	cluster2	cluster3	cluster2	cluster2	none	hypothetical protein	none
COO91_09560	cluster2	cluster3	cluster2	cluster2	none	hypothetical protein	none
COO91_08885	cluster2	cluster3	cluster2	cluster2	none	hypothetical protein	none
COO91_11140	cluster2	cluster3	cluster2	cluster2	hemC	hydroxymethylbilane synthase [EC:2.5.1.61]	Porphyrin and chlorophyll metabolism
COO91_06238	cluster2	cluster3	cluster2	cluster2	none	DNA-binding transcriptional regulator YiaG%2C XRE-type HTH domain	Posttranslational modification, protein turnover, chaperones
COO91_00912	cluster2	cluster3	cluster2	cluster2	none	Holliday junction resolvase RusA	Replication, recombination and repair
COO91_07359	cluster2	cluster3	cluster2	cluster2	none	Archaeal DNA helicase HerA or a related bacterial ATPase%2C containings HAS-barrel and ATPase domains	Replication, recombination and repair
COO91_04584	cluster2	cluster3	cluster2	cluster2	none	Serine/threonine protein kinase	Signal transduction mechanisms
COO91_10704	cluster2	cluster3	cluster2	cluster2	ybaK	Cys-tRNA(Pro)/Cys-tRNA(Cys) deacylase [EC:3.1.1.-]	Translation, ribosomal structure and biogenesis
COO91_08077	cluster2	cluster4	cluster2	cluster2	none	ATPase involved in DNA repair	none
COO91_05540	cluster2	cluster4	cluster2	cluster2	none	fdxN element excision controlling factor protein	none
COO91_02154	cluster2	cluster2	cluster3	cluster2	lhgO	L-2-hydroxyglutarate oxidase [EC:1.1.3.-]	Carbohydrate transport and metabolism
COO91_01200	cluster2	cluster2	cluster3	cluster2	none	Ribulose-5-phosphate 4-epimerase/Fuculose-1-phosphate aldolase	Carbohydrate transport and metabolism
COO91_08835	cluster2	cluster2	cluster3	cluster2	mltA	membrane-bound lytic murein transglycosylase A	Cell Wall and Capsule
COO91_05494	cluster2	cluster2	cluster3	cluster2	none	putative nuclease of the RNAse H fold%2C HicB family	Defense mechanisms
COO91_09386	cluster2	cluster2	cluster3	cluster2	none	FAD/FMN-containing dehydrogenase	Energy production and conversion
COO91_01684	cluster2	cluster2	cluster3	cluster2	none	putative membrane protein YfcA	Function unknown
COO91_01636	cluster2	cluster2	cluster3	cluster2	none	putative protein YjbI%2C containings pentapeptide repeats	Function unknown
COO91_01217	cluster2	cluster2	cluster3	cluster2	glf	UDP-galactopyranose mutase [EC:5.4.99.9]	Galactose metabolism
COO91_08738	cluster2	cluster2	cluster3	cluster2	none	putative N-acetyltransferase YhbS	General function prediction only
COO91_10242	cluster2	cluster2	cluster3	cluster2	none	Tetratricopeptide	General function prediction only
COO91_06506	cluster2	cluster2	cluster3	cluster2	none	putative dehydrogenase	General function prediction only
COO91_10454	cluster2	cluster2	cluster3	cluster2	none	Type IV secretory pathway%2C VirB4 component	Intracellular trafficking, secretion, and vesicular transport
COO91_01264	cluster2	cluster2	cluster3	cluster2	none	Fatty acid desaturase	Lipid transport and metabolism
COO91_08172	cluster2	cluster2	cluster3	cluster2	none	Prophage antirepressor	Mobilome: prophages, transposons
COO91_10751	cluster2	cluster2	cluster3	cluster2	none	hypothetical protein	none
COO91_01172	cluster2	cluster2	cluster3	cluster2	none	hypothetical protein	none
COO91_10517	cluster2	cluster2	cluster3	cluster2	none	hypothetical protein	none
COO91_11009	cluster2	cluster2	cluster3	cluster2	none	hypothetical protein	none
COO91_11244	cluster2	cluster2	cluster3	cluster2	none	Methyl-accepting chemotaxis protein	none
COO91_09987	cluster2	cluster2	cluster3	cluster2	none	hypothetical protein	none
COO91_10963	cluster2	cluster2	cluster3	cluster2	none	hypothetical protein	none
COO91_02052	cluster2	cluster2	cluster3	cluster2	none	putative autotransporter protein	none
COO91_07044	cluster2	cluster2	cluster3	cluster2	none	hypothetical protein	none
COO91_04682	cluster2	cluster2	cluster3	cluster2	none	Phytanoyl-CoA dioxygenase	none
COO91_02027	cluster2	cluster2	cluster3	cluster2	none	hypothetical protein	none
COO91_10001	cluster2	cluster2	cluster3	cluster2	none	hypothetical protein	none
COO91_02622	cluster2	cluster2	cluster3	cluster2	none	hypothetical protein	none
COO91_08589	cluster2	cluster2	cluster3	cluster2	none	putative protein family Ycf35	none
COO91_00269	cluster2	cluster2	cluster3	cluster2	none	hypothetical protein	none
COO91_03848	cluster2	cluster2	cluster3	cluster2	none	hypothetical protein	none
COO91_03359	cluster2	cluster2	cluster3	cluster2	none	hypothetical protein	none
COO91_10102	cluster2	cluster2	cluster3	cluster2	none	Mobile element protein	none
COO91_09229	cluster2	cluster2	cluster3	cluster2	none	hypothetical protein	none
COO91_08719	cluster2	cluster2	cluster3	cluster2	none	hypothetical protein	none
COO91_03352	cluster2	cluster2	cluster3	cluster2	none	hypothetical protein	none
COO91_10457	cluster2	cluster2	cluster3	cluster2	none	hypothetical protein	none
COO91_06850	cluster2	cluster2	cluster3	cluster2	none	hypothetical protein	none
COO91_05802	cluster2	cluster2	cluster3	cluster2	none	hypothetical protein	none
COO91_10993	cluster2	cluster2	cluster3	cluster2	none	Essential recombination function protein	none
COO91_00411	cluster2	cluster2	cluster3	cluster2	none	hypothetical protein	none
COO91_09649	cluster2	cluster2	cluster3	cluster2	none	hypothetical protein	none
COO91_09983	cluster2	cluster2	cluster3	cluster2	none	hypothetical protein	none
COO91_06464	cluster2	cluster2	cluster3	cluster2	none	hypothetical protein	none
COO91_10953	cluster2	cluster2	cluster3	cluster2	none	hypothetical protein	none
COO91_05364	cluster2	cluster2	cluster3	cluster2	none	hypothetical protein	none
COO91_00782	cluster2	cluster2	cluster3	cluster2	aroB	3-dehydroquinate synthase [EC:4.2.3.4]	Phenylalanine, tyrosine and tryptophan biosynthesis
COO91_00781	cluster2	cluster2	cluster3	cluster2	none	putative dithiol-disulfide isomerase%2C DsbA family	Posttranslational modification, protein turnover, chaperones
COO91_09029	cluster2	cluster2	cluster3	cluster2	none	Zn-dependent protease with chaperone function	Posttranslational modification, protein turnover, chaperones
COO91_05490	cluster2	cluster2	cluster3	cluster2	none	DNA repair ATPase RecN	Protein Metabolism
COO91_09990	cluster2	cluster2	cluster3	cluster2	none	Archaeal DNA helicase HerA or a related bacterial ATPase%2C containings HAS-barrel and ATPase domains	Replication, recombination and repair
COO91_08002	cluster2	cluster2	cluster3	cluster2	none	Type I restriction-modification system%2C DNA methylase subunit	Replication, recombination and repair
COO91_06269	cluster2	cluster2	cluster3	cluster2	none	O-Methyltransferase involved in polyketide biosynthesis	Secondary metabolites biosynthesis, transport and catabolism
COO91_05933	cluster2	cluster2	cluster3	cluster2	none	CheY chemotaxis protein or a CheY-like REC	Signal transduction mechanisms
COO91_00752	cluster2	cluster2	cluster4	cluster2	none	CheY chemotaxis protein or a CheY-like REC	Cell Division and Cell Cycle
COO91_06002	cluster2	cluster2	cluster4	cluster2	none	hypothetical protein	none
COO91_09250	cluster2	cluster2	cluster4	cluster2	none	hypothetical protein	none
COO91_10580	cluster2	cluster2	cluster4	cluster2	none	Pyruvate:ferredoxin oxidoreductase and related 2-oxoacid:ferredoxin oxidoreductases%2C beta subunit	none
COO91_10994	cluster2	cluster2	cluster4	cluster2	none	hypothetical protein	none
COO91_10500	cluster2	cluster2	cluster4	cluster2	none	Pyruvate/2-oxoglutarate dehydrogenase complex	none
COO91_03358	cluster2	cluster2	cluster4	cluster2	none	hypothetical protein	none
COO91_08505	cluster3	cluster3	cluster1	cluster3	none	Superfamily II DNA or RNA helicase	Cell Division and Cell Cycle
COO91_08528	cluster3	cluster3	cluster1	cluster3	none	Ubiqui/menaqui biosynthesis C-methylase UbiE	Coenzyme transport and metabolism
COO91_10196	cluster3	cluster3	cluster1	cluster3	none	putative acetyltransferase	General function prediction only
COO91_00934	cluster3	cluster3	cluster1	cluster3	cynT	carbonic anhydrase [EC:4.2.1.1]	Nitrogen metabolism
COO91_00904	cluster3	cluster3	cluster1	cluster3	none	hypothetical protein	none
COO91_00036	cluster3	cluster3	cluster1	cluster3	none	hypothetical protein	none
COO91_00100	cluster3	cluster3	cluster1	cluster3	none	hypothetical protein	none
COO91_09391	cluster3	cluster3	cluster1	cluster3	none	hypothetical protein	none
COO91_10754	cluster3	cluster3	cluster1	cluster3	none	hypothetical protein	none
COO91_11059	cluster3	cluster3	cluster1	cluster3	none	hypothetical protein	none
COO91_10544	cluster3	cluster3	cluster1	cluster3	none	hypothetical protein	none
COO91_03432	cluster3	cluster3	cluster1	cluster3	none	Transposase%2C Tn5-like%2C N-terminal	none
COO91_04194	cluster3	cluster3	cluster2	cluster3	pstC	phosphate transport system permease protein	ABC transporters
COO91_06789	cluster3	cluster3	cluster2	cluster3	none	GAF domain-like	Cell Division and Cell Cycle
COO91_03912	cluster3	cluster3	cluster2	cluster3	none	Poly-gamma-glutamate biosynthesis protein CapA/YwtB	Cell wall/membrane/envelope biogenesis
COO91_07397	cluster3	cluster3	cluster2	cluster3	none	Ubiqui/menaqui biosynthesis C-methylase UbiE	Coenzyme transport and metabolism
COO91_06532	cluster3	cluster3	cluster2	cluster3	none	Secreted protein containing bacterial Ig-like domain and vWFA domain	Cofactors, Vitamins, Prosthetic Groups, Pigments
COO91_08529	cluster3	cluster3	cluster2	cluster3	none	2%2C4-dienoyl-CoA reductase or related NADH-dependent reductase%2C Old Yellow Enzyme	Energy production and conversion
[truncated: 1,789 more rows]

## Sheet: Supplementary Table 2
Supplementary Table 2. The basic statistics of 2020 genomes in cyanobacterium used for comparative analysis.
Strain	RF00442(Gd-I RS)	Order	Cluster 1	Cluster 2	Cluster 3	Ecosystem
Chroococcidiopsis sp. TS-821	2	Chroococcidiopsidales	guanidine carboxylase pathway		ATP-binding cassette (ABC)-type importers	Freshwater
Chroogloeocystis siderophila 5.2 s.c.1	2	Chroococcales	guanidine carboxylase pathway		ATP-binding cassette (ABC)-type importers	Freshwater
Cyanothece sp. PCC 7425	2	Oscillatoriales	guanidine carboxylase pathway		ATP-binding cassette (ABC)-type importers	Freshwater
Gloeocapsa sp. PCC 7428	2	Chroococcales	guanidine carboxylase pathway		ATP-binding cassette (ABC)-type importers	Freshwater
Kamptonema formosum PCC 6407	2	Oscillatoriales	guanidine carboxylase pathway		ATP-binding cassette (ABC)-type importers	Freshwater
Kamptonema sp. PCC 6506	2	Oscillatoriales	guanidine carboxylase pathway		ATP-binding cassette (ABC)-type importers	Freshwater
Leptolyngbya boryana IU 594	2	Pseudanabaenales	guanidine carboxylase pathway		ATP-binding cassette (ABC)-type importers	Freshwater
Leptolyngbya sp. Cla-17	2	Pseudanabaenales	guanidine carboxylase pathway		ATP-binding cassette (ABC)-type importers	Freshwater
Leptolyngbya sp. FACHB-238	2	Pseudanabaenales	guanidine carboxylase pathway		ATP-binding cassette (ABC)-type importers	Freshwater
Phormidesmis priestleyi ULC007	2	Pseudanabaenales	guanidine carboxylase pathway		ATP-binding cassette (ABC)-type importers	Freshwater
Pseudanabaena sp. 42896M_M3	2	Pseudanabaenales	guanidine carboxylase pathway		ATP-binding cassette (ABC)-type importers	Freshwater
Pseudanabaena sp. UWO311	2	Pseudanabaenales	guanidine carboxylase pathway		ATP-binding cassette (ABC)-type importers	Freshwater
Stenomitos frigidus ULC18	2	Pseudanabaenales	guanidine carboxylase pathway		ATP-binding cassette (ABC)-type importers	Freshwater
Leptolyngbya boryana PCC 6306	2	Pseudanabaenales	guanidine carboxylase pathway		ATP-binding cassette (ABC)-type importers	Freshwater
Leptolyngbyaceae cyanobacterium CSU_1_3	2	Pseudanabaenales	guanidine carboxylase pathway		ATP-binding cassette (ABC)-type importers	Intertidal zone
Amazonocrinis nigriterrae CENA67	2	Nostocales	guanidine carboxylase pathway		ATP-binding cassette (ABC)-type importers	Terrestrial
Chroococcidiopsidaceae cyanobacterium CP_BM_RX_35	2	Chroococcidiopsidales	guanidine carboxylase pathway		ATP-binding cassette (ABC)-type importers	Terrestrial
Cyanobacteria bacterium FACHB-502	2	unclassified Cyanobacteria	guanidine carboxylase pathway		ATP-binding cassette (ABC)-type importers	Terrestrial
Cyanobacteria bacterium FACHB-63	2	unclassified Cyanobacteria	guanidine carboxylase pathway		ATP-binding cassette (ABC)-type importers	Terrestrial
Cyanobacteria bacterium FACHB-DQ100	2	unclassified Cyanobacteria	guanidine carboxylase pathway		ATP-binding cassette (ABC)-type importers	Terrestrial
Desmonostoc geniculatum HA4340-LM1	2	Nostocales	guanidine carboxylase pathway		ATP-binding cassette (ABC)-type importers	Terrestrial
Gloeobacterales_cyanobacterium ES-bin-313	2	Gloeobacterales	guanidine carboxylase pathway		ATP-binding cassette (ABC)-type importers	Terrestrial
Leptolyngbya sp. FACHB-1624	2	Pseudanabaenales	guanidine carboxylase pathway		ATP-binding cassette (ABC)-type importers	Terrestrial
Leptolyngbya sp. FACHB-17	2	Pseudanabaenales	guanidine carboxylase pathway		ATP-binding cassette (ABC)-type importers	Terrestrial
Leptolyngbya sp. FACHB-239	2	Pseudanabaenales	guanidine carboxylase pathway		ATP-binding cassette (ABC)-type importers	Terrestrial
Leptolyngbya sp. FACHB-321	2	Pseudanabaenales	guanidine carboxylase pathway		ATP-binding cassette (ABC)-type importers	Terrestrial
Leptolyngbya sp. FACHB-711	2	Pseudanabaenales	guanidine carboxylase pathway		ATP-binding cassette (ABC)-type importers	Terrestrial
Leptolyngbya sp. NIES-2104	2	Pseudanabaenales	guanidine carboxylase pathway		ATP-binding cassette (ABC)-type importers	Terrestrial
Leptolyngbya sp. NIES-3755	2	Pseudanabaenales	guanidine carboxylase pathway		ATP-binding cassette (ABC)-type importers	Terrestrial
Leptolyngbya sp. UWPOB LEPTO1	2	Pseudanabaenales	guanidine carboxylase pathway		ATP-binding cassette (ABC)-type importers	Terrestrial
Leptolyngbyaceae cyanobacterium LF-bin-113	2	Pseudanabaenales	guanidine carboxylase pathway		ATP-binding cassette (ABC)-type importers	Terrestrial
Lyngbya sp. HA4199-MV5	2	Oscillatoriales	guanidine carboxylase pathway		ATP-binding cassette (ABC)-type importers	Terrestrial
Microcoleus sp. FACHB-61	2	Oscillatoriales	guanidine carboxylase pathway		ATP-binding cassette (ABC)-type importers	Terrestrial
Myxacorys californica WJT36-NPBG1	2	Pseudanabaenales	guanidine carboxylase pathway		ATP-binding cassette (ABC)-type importers	Terrestrial
Nostoc flagelliforme CCNUN1	2	Nostocales	guanidine carboxylase pathway		ATP-binding cassette (ABC)-type importers	Terrestrial
Nostoc indistinguendum CM1-VF10	2	Nostocales	guanidine carboxylase pathway		ATP-binding cassette (ABC)-type importers	Terrestrial
Nostoc sp. FACHB-888	2	Nostocales	guanidine carboxylase pathway		ATP-binding cassette (ABC)-type importers	Terrestrial
Nostoc sp. XA010	2	Nostocales	guanidine carboxylase pathway		ATP-binding cassette (ABC)-type importers	Terrestrial
Nostoc sp. XA013	2	Nostocales	guanidine carboxylase pathway		ATP-binding cassette (ABC)-type importers	Terrestrial
Phormidium sp. FACHB-592	2	Oscillatoriales	guanidine carboxylase pathway		ATP-binding cassette (ABC)-type importers	Terrestrial
Phormidium tanganyikae FI6-MK23	2	Oscillatoriales	guanidine carboxylase pathway		ATP-binding cassette (ABC)-type importers	Terrestrial
Plectolyngbya sp. WJT66-NPBG17	2	Pseudanabaenales	guanidine carboxylase pathway		ATP-binding cassette (ABC)-type importers	Terrestrial
Pseudanabaena biceps PCC 7429	2	Pseudanabaenales	guanidine carboxylase pathway		ATP-binding cassette (ABC)-type importers	Terrestrial
Pseudanabaena frigida ULC066bin1	2	Pseudanabaenales	guanidine carboxylase pathway		ATP-binding cassette (ABC)-type importers	Terrestrial
Pseudanabaena sp. ULC068bin1	2	Pseudanabaenales	guanidine carboxylase pathway		ATP-binding cassette (ABC)-type importers	Terrestrial
Pseudanabaenaceae cyanobacterium LEGE 13415	2	Pseudanabaenales	guanidine carboxylase pathway		ATP-binding cassette (ABC)-type importers	Terrestrial
Scytolyngbya sp. HA4215-MV1	2	Pseudanabaenales	guanidine carboxylase pathway		ATP-binding cassette (ABC)-type importers	Terrestrial
Scytonema sp. UIC 10036	2	Nostocales	guanidine carboxylase pathway		ATP-binding cassette (ABC)-type importers	Terrestrial
Synechococcus sp. PCC 7502	2	Synechococcales	guanidine carboxylase pathway		ATP-binding cassette (ABC)-type importers	Terrestrial
Tildeniella nuda ZEHNDER 1965/U140	2	Pseudanabaenales	guanidine carboxylase pathway		ATP-binding cassette (ABC)-type importers	Terrestrial
Leptolyngbya boryana dg5	2	Pseudanabaenales	guanidine carboxylase pathway		ATP-binding cassette (ABC)-type importers	Unknown
Leptolyngbya boryana IAM M-101	2	Pseudanabaenales	guanidine carboxylase pathway		ATP-binding cassette (ABC)-type importers	Unknown
Leptolyngbya boryana NIES-2135	2	Pseudanabaenales	guanidine carboxylase pathway		ATP-binding cassette (ABC)-type importers	Unknown
Leptolyngbya sp. FACHB-161	2	Pseudanabaenales	guanidine carboxylase pathway		ATP-binding cassette (ABC)-type importers	Unknown
Pseudanabaena sp. PCC 6802	2	Pseudanabaenales	guanidine carboxylase pathway		ATP-binding cassette (ABC)-type importers	Freshwater
Chamaesiphon minutus PCC 6605	1	Synechococcales	guanidine carboxylase pathway			Freshwater
Chamaesiphon polymorphus CCALA 037	1	Synechococcales	guanidine carboxylase pathway			Freshwater
Gloeomargarita lithophora Alchichica-D10	1	Gloeomargaritales	guanidine carboxylase pathway			Freshwater
Microcoleus sp. EPA2	1	Oscillatoriales	guanidine carboxylase pathway			Freshwater
Microcoleus sp. GA 180221 E-1-1-MAG-45 11	1	Oscillatoriales	guanidine carboxylase pathway			Freshwater
Microcoleus sp. GA 180221 E-1-2-MAG-45 10	1	Oscillatoriales	guanidine carboxylase pathway			Freshwater
Microcoleus sp. GA 180221 E-2-1-MAG-45 12	1	Oscillatoriales	guanidine carboxylase pathway			Freshwater
Synechococcus sp. C9	1	Synechococcales	guanidine carboxylase pathway			Freshwater
Pseudanabaena sp. RU_4_16	1	Pseudanabaenales	guanidine carboxylase pathway			Intertidal zone
Microcoleus sp. SIO2G3	1	Oscillatoriales	guanidine carboxylase pathway			Marine
Nostoc edaphicum CCNP1411	1	Nostocales	guanidine carboxylase pathway			Marine
Chroococcidiopsidaceae cyanobacterium CP_BM_ER_R8_30	1	Chroococcidiopsidales	guanidine carboxylase pathway			Terrestrial
Gloeobacter morelensis MG652769	1	Gloeobacterales	guanidine carboxylase pathway			Terrestrial
Gloeobacter violaceus PCC 7421	1	Gloeobacterales	guanidine carboxylase pathway			Terrestrial
Leptolyngbya ohadii IS1	1	Pseudanabaenales	guanidine carboxylase pathway			Terrestrial
Leptolyngbyaceae cyanobacterium LF-bin-369	1	Pseudanabaenales	guanidine carboxylase pathway			Terrestrial
Mastigocladus laminosus WC112	1	Nostocales	guanidine carboxylase pathway			Terrestrial
Microcoleus asticus IPMA8	1	Oscillatoriales	guanidine carboxylase pathway			Terrestrial
Microcoleus sp. C1-bin4	1	Oscillatoriales	guanidine carboxylase pathway			Terrestrial
Microcoleus sp. Co-bin12	1	Oscillatoriales	guanidine carboxylase pathway			Terrestrial
Microcoleus sp. FACHB-45	1	Oscillatoriales	guanidine carboxylase pathway			Terrestrial
Microcoleus sp. FACHB-84	1	Oscillatoriales	guanidine carboxylase pathway			Terrestrial
Microcoleus sp. FACHB-DQ6	1	Oscillatoriales	guanidine carboxylase pathway			Terrestrial
Microcoleus sp. T1-bin1	1	Oscillatoriales	guanidine carboxylase pathway			Terrestrial
Microcoleus vaginatus FGP-2	1	Oscillatoriales	guanidine carboxylase pathway			Terrestrial
Microcoleus vaginatus HSN003	1	Oscillatoriales	guanidine carboxylase pathway			Terrestrial
Microcoleus vaginatus PCC 9802	1	Oscillatoriales	guanidine carboxylase pathway			Terrestrial
Myxacorys chilensis ATA2-1-KO14	1	Pseudanabaenales	guanidine carboxylase pathway			Terrestrial
Nostoc cf. commune SO-36	1	Nostocales	guanidine carboxylase pathway			Terrestrial
Nostoc flagelliforme FACHB-838	1	Nostocales	guanidine carboxylase pathway			Terrestrial
Nostoc sp. C3-bin3	1	Nostocales	guanidine carboxylase pathway			Terrestrial
Nostocales cyanobacterium Centralia_MAG_434	1	Nostocales	guanidine carboxylase pathway			Terrestrial
Oscillatoria nigro-viridis PCC 7112	1	Oscillatoriales	guanidine carboxylase pathway			Terrestrial
Phormidium tenue FACHB-886	1	Oscillatoriales	guanidine carboxylase pathway			Terrestrial
Tolypothrix sp. T3-bin4	1	Nostocales	guanidine carboxylase pathway			Terrestrial
Aphanocapsa lilacina HA4352-LM1	1	Synechococcales	guanidine carboxylase pathway			Terrestrial
Leptolyngbya sp. KIOST-1	3	Pseudanabaenales		guanidine hydrolase pathway	SssF	Freshwater
Nodosilinea sp. LEGE 06152	3	Pseudanabaenales		guanidine hydrolase pathway	SssF	Marine
Nodosilinea sp. LEGE 07088	3	Pseudanabaenales		guanidine hydrolase pathway	SssF	Marine
Shackletoniella antarctica ULC041bin1	3	Pseudanabaenales		guanidine hydrolase pathway	SssF	Unknown
cf. Phormidesmis sp. LEGE 11477	2	Pseudanabaenales		guanidine hydrolase pathway	SssF	Freshwater
Chlorogloea sp. CCALA 695	2	Chroococcales		guanidine hydrolase pathway	ATP-binding cassette (ABC)-type importers	Freshwater
Chroococcales cyanobacterium IPPAS B-1203	2	Chroococcales		guanidine hydrolase pathway	ATP-binding cassette (ABC)-type importers	Freshwater
Coleofasciculus sp. S288	2	Oscillatoriales		guanidine hydrolase pathway	ATP-binding cassette (ABC)-type importers	Freshwater
Leptolyngbyaceae cyanobacterium M65 K2018 010	2	Pseudanabaenales		guanidine hydrolase pathway	SssF	Freshwater
Nodosilinea sp. LEGE 07298	2	Pseudanabaenales		guanidine hydrolase pathway	SssF	Freshwater
Phormidium tenue FACHB-1052	2	Oscillatoriales		guanidine hydrolase pathway	ATP-binding cassette (ABC)-type importers	Freshwater
Phormidium tenue NIES-30	2	Oscillatoriales		guanidine hydrolase pathway	ATP-binding cassette (ABC)-type importers	Freshwater
Gloeocapsopsis crepidinum LEGE 06123	2	Chroococcales		guanidine hydrolase pathway	ATP-binding cassette (ABC)-type importers	Host-associated
Leptothoe spongobia TAU-MAC 1115	2	Pseudanabaenales		guanidine hydrolase pathway	SssF	Host-associated
Pleurocapsales cyanobacterium LEGE 06147	2	Pleurocapsales		guanidine hydrolase pathway	SssF	Intertidal zone
Acaryochloridaceae cyanobacterium SU_2_1	2	Synechococcales		guanidine hydrolase pathway	ATP-binding cassette (ABC)-type importers	Marine
Acaryochloris marina MBIC11017	2	Synechococcales		guanidine hydrolase pathway	SssF	Marine
Acaryochloris thomasi RCC1774	2	Synechococcales		guanidine hydrolase pathway	SssF	Marine
Cyanothece sp. SIO1E1	2	Oscillatoriales		guanidine hydrolase pathway	SssF	Marine
Halomicronema sp. CCY15110	2	Pseudanabaenales		guanidine hydrolase pathway	SssF	Marine
Leptolyngbya sp. SIO1D8	2	Pseudanabaenales		guanidine hydrolase pathway	SssF	Marine
Leptolyngbya sp. SIO3F4	2	Pseudanabaenales		guanidine hydrolase pathway	SssF	Marine
Leptolyngbya sp. SIOISBB	2	Pseudanabaenales		guanidine hydrolase pathway	SssF	Marine
Lyngbya confervoides BDU141951	2	Oscillatoriales		guanidine hydrolase pathway	SssF	Marine
Nodosilinea nodulosa PCC 7104	2	Pseudanabaenales		guanidine hydrolase pathway	ATP-binding cassette (ABC)-type importers	Marine
Gloeocapsopsis dulcis AAB1 = 1H9	2	Chroococcales		guanidine hydrolase pathway	ATP-binding cassette (ABC)-type importers	Terrestrial
Leptolyngbya sp. FACHB-36	2	Pseudanabaenales		guanidine hydrolase pathway	ATP-binding cassette (ABC)-type importers	Terrestrial
Leptolyngbya sp. FACHB-60	2	Pseudanabaenales		guanidine hydrolase pathway	ATP-binding cassette (ABC)-type importers	Terrestrial
Myxacorys almedinensis A	2	Pseudanabaenales		guanidine hydrolase pathway	ATP-binding cassette (ABC)-type importers	Terrestrial
Nodosilinea sp. FACHB-13	2	Pseudanabaenales		guanidine hydrolase pathway	ATP-binding cassette (ABC)-type importers	Terrestrial
Nodosilinea sp. FACHB-131	2	Pseudanabaenales		guanidine hydrolase pathway	ATP-binding cassette (ABC)-type importers	Terrestrial
Nodosilinea sp. FACHB-141	2	Pseudanabaenales		guanidine hydrolase pathway	ATP-binding cassette (ABC)-type importers	Terrestrial
Phormidium sp. FACHB-322	2	Oscillatoriales		guanidine hydrolase pathway	ATP-binding cassette (ABC)-type importers	Terrestrial
Phormidium sp. FACHB-77	2	Oscillatoriales		guanidine hydrolase pathway	ATP-binding cassette (ABC)-type importers	Terrestrial
Pseudanabaena sp. FACHB-2040	2	Pseudanabaenales		guanidine hydrolase pathway	SssF	Terrestrial
Tildeniella torsiva UHER 1998/13D	2	Pseudanabaenales		guanidine hydrolase pathway	ATP-binding cassette (ABC)-type importers	Terrestrial
Leptolyngbya sp. 'hensonii'	2	Pseudanabaenales		guanidine hydrolase pathway	ATP-binding cassette (ABC)-type importers	Unknown
aff. Roholtiella sp. LEGE 12411	1	Nostocales		guanidine hydrolase pathway		Freshwater
Alkalinema sp. CACIAM 70d	1	Pseudanabaenales		guanidine hydrolase pathway		Freshwater
Alkalinema sp. FACHB-956	1	Pseudanabaenales		guanidine hydrolase pathway		Freshwater
Aphanothece cf. minutissima CCALA 015	1	Chroococcales		guanidine hydrolase pathway		Freshwater
Aphanothece hegewaldii CCALA 016	1	Chroococcales		guanidine hydrolase pathway		Freshwater
Chlorogloea purpurea SAG 13.99	1	Chroococcales		guanidine hydrolase pathway		Freshwater
Chlorogloeopsis fritschii C42_A2020_084	1	Nostocales		guanidine hydrolase pathway		Freshwater
Chlorogloeopsis fritschii PCC 9212	1	Nostocales		guanidine hydrolase pathway		Freshwater
Chroococcales cyanobacterium metabat2.561	1	Chroococcales		guanidine hydrolase pathway		Freshwater
Chroococcidiopsis cubana CCALA 043	1	Chroococcidiopsidales		guanidine hydrolase pathway		Freshwater
Chroococcidiopsis sp. CCALA 051	1	Chroococcidiopsidales		guanidine hydrolase pathway		Freshwater
Chroococcidiopsis sp. FACHB-1243	1	Chroococcidiopsidales		guanidine hydrolase pathway		Freshwater
Chroococcus sp. FPU101	1	Chroococcales		guanidine hydrolase pathway		Freshwater
Coleofasciculus sp. FACHB-1120	1	Oscillatoriales		guanidine hydrolase pathway		Freshwater
Cyanobacterium aponinum IPPAS B-1201	1	Chroococcales		guanidine hydrolase pathway		Freshwater
Cyanobacterium aponinum PCC 10605	1	Chroococcales		guanidine hydrolase pathway	ATP-binding cassette (ABC)-type importers	Freshwater
cyanobacterium PCC 7702	1	Nostocales		guanidine hydrolase pathway	ATP-binding cassette (ABC)-type importers	Freshwater
Cyanobacterium stanieri PCC 7202	1	Chroococcales		guanidine hydrolase pathway	ATP-binding cassette (ABC)-type importers	Freshwater
Cyanobium gracile PCC 6307	1	Synechococcales		guanidine hydrolase pathway		Freshwater
Cyanobium sp. CACIAM 14	1	Synechococcales		guanidine hydrolase pathway		Freshwater
Cyanobium sp. Copco Reservoir LC18	1	Synechococcales		guanidine hydrolase pathway		Freshwater
Cyanobium sp. M30B3	1	Synechococcales		guanidine hydrolase pathway		Freshwater
Cyanobium sp. PLM2.Bin73	1	Synechococcales		guanidine hydrolase pathway		Freshwater
Cyanosarcina cf. burmensis CCALA 770	1	Chroococcales		guanidine hydrolase pathway		Freshwater
Cylindrospermopsis raciborskii C03	1	Nostocales		guanidine hydrolase pathway		Freshwater
Cylindrospermopsis raciborskii C04	1	Nostocales		guanidine hydrolase pathway		Freshwater
Cylindrospermopsis raciborskii C07	1	Nostocales		guanidine hydrolase pathway		Freshwater
Cylindrospermopsis raciborskii CENA302	1	Nostocales		guanidine hydrolase pathway		Freshwater
Cylindrospermopsis raciborskii CENA303	1	Nostocales		guanidine hydrolase pathway		Freshwater
Cylindrospermopsis raciborskii CHAB3438	1	Nostocales		guanidine hydrolase pathway		Freshwater
Cylindrospermopsis raciborskii CS-505	1	Nostocales		guanidine hydrolase pathway		Freshwater
Cylindrospermopsis raciborskii CS-506_A	1	Nostocales		guanidine hydrolase pathway		Freshwater
Cylindrospermopsis raciborskii CS-506_B	1	Nostocales		guanidine hydrolase pathway		Freshwater
Cylindrospermopsis raciborskii CS-506_C	1	Nostocales		guanidine hydrolase pathway		Freshwater
Cylindrospermopsis raciborskii CS-506_D	1	Nostocales		guanidine hydrolase pathway		Freshwater
Cylindrospermopsis raciborskii CS-508	1	Nostocales		guanidine hydrolase pathway		Freshwater
Cylindrospermopsis raciborskii CYLP	1	Nostocales		guanidine hydrolase pathway		Freshwater
Cylindrospermopsis raciborskii CYRF	1	Nostocales		guanidine hydrolase pathway		Freshwater
Cylindrospermopsis raciborskii GIHE 2018	1	Nostocales		guanidine hydrolase pathway		Freshwater
Cylindrospermopsis raciborskii ITEP-A1	1	Nostocales		guanidine hydrolase pathway		Freshwater
Cylindrospermopsis raciborskii KL1	1	Nostocales		guanidine hydrolase pathway		Freshwater
Cylindrospermopsis raciborskii LB2897	1	Nostocales		guanidine hydrolase pathway		Freshwater
Cylindrospermopsis raciborskii MVCC14	1	Nostocales		guanidine hydrolase pathway		Freshwater
Cylindrospermopsis raciborskii MVCC19	1	Nostocales		guanidine hydrolase pathway		Freshwater
Cylindrospermopsis raciborskii N8	1	Nostocales		guanidine hydrolase pathway		Freshwater
Cylindrospermopsis raciborskii S01	1	Nostocales		guanidine hydrolase pathway		Freshwater
Cylindrospermopsis raciborskii S05	1	Nostocales		guanidine hydrolase pathway		Freshwater
Cylindrospermopsis raciborskii S06	1	Nostocales		guanidine hydrolase pathway		Freshwater
Cylindrospermopsis raciborskii S07	1	Nostocales		guanidine hydrolase pathway		Freshwater
Cylindrospermopsis raciborskii S10	1	Nostocales		guanidine hydrolase pathway		Freshwater
Cylindrospermopsis raciborskii S14	1	Nostocales		guanidine hydrolase pathway		Freshwater
Cylindrospermopsis sp. CR12	1	Nostocales		guanidine hydrolase pathway		Freshwater
Dactylococcopsis salina PCC 8305	1	Synechococcales		guanidine hydrolase pathway		Freshwater
Desertifilum sp. FACHB-1129	1	Oscillatoriales		guanidine hydrolase pathway		Freshwater
Desertifilum sp. FACHB-866	1	Oscillatoriales		guanidine hydrolase pathway		Freshwater
Desertifilum sp. IPPAS B-1220	1	Oscillatoriales		guanidine hydrolase pathway		Freshwater
Elainella sp. C42_A2020_010	1	Pseudanabaenales		guanidine hydrolase pathway		Freshwater
Euhalothece natronophila Z-M001	1	Chroococcales		guanidine hydrolase pathway		Freshwater
Euhalothece sp. KZN 001	1	Chroococcales		guanidine hydrolase pathway		Freshwater
Fischerella major NIES-592	1	Nostocales		guanidine hydrolase pathway		Freshwater
Fischerella muscicola CCMEE 5323	1	Nostocales		guanidine hydrolase pathway		Freshwater
Fischerella muscicola PCC 7414	1	Nostocales		guanidine hydrolase pathway		Freshwater
Fischerella muscicola SAG 1427-1	1	Nostocales		guanidine hydrolase pathway		Freshwater
Fischerella sp. FACHB-380	1	Nostocales		guanidine hydrolase pathway		Freshwater
Fischerella sp. NIES-3754	1	Nostocales		guanidine hydrolase pathway		Freshwater
Fischerella sp. PCC 9605	1	Nostocales		guanidine hydrolase pathway		Freshwater
Fischerella thermalis 111/344/542	1	Nostocales		guanidine hydrolase pathway		Freshwater
Fischerella thermalis BR2B	1	Nostocales		guanidine hydrolase pathway		Freshwater
Fischerella thermalis CCMEE 5194	1	Nostocales		guanidine hydrolase pathway		Freshwater
Fischerella thermalis CCMEE 5196	1	Nostocales		guanidine hydrolase pathway		Freshwater
Fischerella thermalis CCMEE 5198	1	Nostocales		guanidine hydrolase pathway		Freshwater
Fischerella thermalis CCMEE 5201	1	Nostocales		guanidine hydrolase pathway		Freshwater
Fischerella thermalis CCMEE 5205	1	Nostocales		guanidine hydrolase pathway		Freshwater
Fischerella thermalis CCMEE 5208	1	Nostocales		guanidine hydrolase pathway		Freshwater
Fischerella thermalis CCMEE 5268	1	Nostocales		guanidine hydrolase pathway		Freshwater
Fischerella thermalis CCMEE 5273	1	Nostocales		guanidine hydrolase pathway		Freshwater
Fischerella thermalis CCMEE 5282	1	Nostocales		guanidine hydrolase pathway		Freshwater
Fischerella thermalis CCMEE 5318	1	Nostocales		guanidine hydrolase pathway		Freshwater
Fischerella thermalis CCMEE 5330	1	Nostocales		guanidine hydrolase pathway		Freshwater
Fischerella thermalis JSC-11	1	Nostocales		guanidine hydrolase pathway		Freshwater
Fischerella thermalis M48_A2018_028	1	Nostocales		guanidine hydrolase pathway		Freshwater
Fischerella thermalis M58_A2018_009	1	Nostocales		guanidine hydrolase pathway		Freshwater
Fischerella thermalis M66_A2018_004	1	Nostocales		guanidine hydrolase pathway		Freshwater
Fischerella thermalis PCC 7521	1	Nostocales		guanidine hydrolase pathway		Freshwater
Fischerella thermalis WC114	1	Nostocales		guanidine hydrolase pathway		Freshwater
Fischerella thermalis WC119	1	Nostocales		guanidine hydrolase pathway		Freshwater
Fischerella thermalis WC157	1	Nostocales		guanidine hydrolase pathway		Freshwater
Fischerella thermalis WC213	1	Nostocales		guanidine hydrolase pathway		Freshwater
Fischerella thermalis WC217	1	Nostocales		guanidine hydrolase pathway		Freshwater
Fischerella thermalis WC245	1	Nostocales		guanidine hydrolase pathway		Freshwater
Fischerella thermalis WC246	1	Nostocales		guanidine hydrolase pathway		Freshwater
Fischerella thermalis WC249	1	Nostocales		guanidine hydrolase pathway		Freshwater
Fischerella thermalis WC341	1	Nostocales		guanidine hydrolase pathway		Freshwater
Fischerella thermalis WC439	1	Nostocales		guanidine hydrolase pathway		Freshwater
Fischerella thermalis WC442	1	Nostocales		guanidine hydrolase pathway		Freshwater
Fischerella thermalis WC542	1	Nostocales		guanidine hydrolase pathway		Freshwater
Fischerella thermalis WC558	1	Nostocales		guanidine hydrolase pathway		Freshwater
Fischerella thermalis WC559	1	Nostocales		guanidine hydrolase pathway		Freshwater
Geitlerinema sp. FC II	1	Oscillatoriales		guanidine hydrolase pathway		Freshwater
Geitlerinema sp. PCC 7407	1	Oscillatoriales		guanidine hydrolase pathway		Freshwater
Geminocystis sp. GBBB08	1	Chroococcales		guanidine hydrolase pathway		Freshwater
Gloeocapsa sp. PCC 73106	1	Chroococcales		guanidine hydrolase pathway		Freshwater
Halothece sp. PCC 7418	1	Chroococcales		guanidine hydrolase pathway		Freshwater
Hydrococcus sp. C42 A2020 068	1	Pleurocapsales		guanidine hydrolase pathway		Freshwater
Kovacikia minuta CCNU0001	1	Pseudanabaenales		guanidine hydrolase pathway		Freshwater
Leptolyngbya cf. ectocarpi LEGE 11479	1	Pseudanabaenales		guanidine hydrolase pathway		Freshwater
Leptolyngbya sp. BL0902	1	Pseudanabaenales		guanidine hydrolase pathway		Freshwater
Leptolyngbya sp. IPPAS B-1204	1	Pseudanabaenales		guanidine hydrolase pathway		Freshwater
Leptolyngbya sp. LCM1.Bin17	1	Pseudanabaenales		guanidine hydrolase pathway		Freshwater
Leptolyngbya sp. PCC 6406	1	Pseudanabaenales		guanidine hydrolase pathway		Freshwater
Leptolyngbyaceae cyanobacterium C42_A2020_001	1	Pseudanabaenales		guanidine hydrolase pathway		Freshwater
Leptolyngbyaceae cyanobacterium JSC-12	1	Pseudanabaenales		guanidine hydrolase pathway		Freshwater
Leptolyngbyaceae cyanobacterium M33_DOE_097	1	Pseudanabaenales		guanidine hydrolase pathway		Freshwater
Leptolyngbyaceae cyanobacterium T60_A2020_046	1	Pseudanabaenales		guanidine hydrolase pathway		Freshwater
Leptothermofonsia sichuanensis E412	1	Pseudanabaenales		guanidine hydrolase pathway		Freshwater
Limnospira indica PCC 8005	1	Oscillatoriales		guanidine hydrolase pathway		Freshwater
Limnothrix sp. CACIAM 69d	1	Pseudanabaenales		guanidine hydrolase pathway		Freshwater
Limnothrix sp. FACHB-1083	1	Pseudanabaenales		guanidine hydrolase pathway		Freshwater
Limnothrix sp. FACHB-1088	1	Pseudanabaenales		guanidine hydrolase pathway		Freshwater
Limnothrix sp. FACHB-708	1	Pseudanabaenales		guanidine hydrolase pathway		Freshwater
Limnothrix sp. FACHB-881	1	Pseudanabaenales		guanidine hydrolase pathway		Freshwater
Limnothrix sp. P13C2	1	Pseudanabaenales		guanidine hydrolase pathway		Freshwater
Limnothrix sp. PR1529	1	Pseudanabaenales		guanidine hydrolase pathway		Freshwater
Merismopedia glauca CCAP 1448/3	1	Synechococcales		guanidine hydrolase pathway		Freshwater
Microcystis aeruginosa 11-30S32	1	Chroococcales		guanidine hydrolase pathway		Freshwater
Microcystis aeruginosa BK11-02	1	Chroococcales		guanidine hydrolase pathway		Freshwater
Microcystis aeruginosa BLCC-F108	1	Chroococcales		guanidine hydrolase pathway		Freshwater
Microcystis aeruginosa BLCC-F158	1	Chroococcales		guanidine hydrolase pathway		Freshwater
Microcystis aeruginosa BS11-05	1	Chroococcales		guanidine hydrolase pathway		Freshwater
Microcystis aeruginosa BS13-02	1	Chroococcales		guanidine hydrolase pathway		Freshwater
Microcystis aeruginosa BS13-10	1	Chroococcales		guanidine hydrolase pathway		Freshwater
Microcystis aeruginosa CHAOHU 1326	1	Chroococcales		guanidine hydrolase pathway		Freshwater
Microcystis aeruginosa DA14	1	Chroococcales		guanidine hydrolase pathway		Freshwater
Microcystis aeruginosa FACHB-524	1	Chroococcales		guanidine hydrolase pathway		Freshwater
Microcystis aeruginosa FACHB-905	1	Chroococcales		guanidine hydrolase pathway		Freshwater
Microcystis aeruginosa FCY-26	1	Chroococcales		guanidine hydrolase pathway		Freshwater
Microcystis aeruginosa FCY-27	1	Chroococcales		guanidine hydrolase pathway		Freshwater
Microcystis aeruginosa FCY-28	1	Chroococcales		guanidine hydrolase pathway		Freshwater
Microcystis aeruginosa G11-01	1	Chroococcales		guanidine hydrolase pathway		Freshwater
Microcystis aeruginosa G11-04	1	Chroococcales		guanidine hydrolase pathway		Freshwater
Microcystis aeruginosa G11-06	1	Chroococcales		guanidine hydrolase pathway		Freshwater
Microcystis aeruginosa G11-09	1	Chroococcales		guanidine hydrolase pathway		Freshwater
Microcystis aeruginosa G13-01	1	Chroococcales		guanidine hydrolase pathway		Freshwater
Microcystis aeruginosa G13-03	1	Chroococcales		guanidine hydrolase pathway		Freshwater
Microcystis aeruginosa G13-05	1	Chroococcales		guanidine hydrolase pathway		Freshwater
Microcystis aeruginosa G13-07	1	Chroococcales		guanidine hydrolase pathway		Freshwater
Microcystis aeruginosa G13-09	1	Chroococcales		guanidine hydrolase pathway		Freshwater
Microcystis aeruginosa G13-10	1	Chroococcales		guanidine hydrolase pathway		Freshwater
Microcystis aeruginosa G13-11	1	Chroococcales		guanidine hydrolase pathway		Freshwater
Microcystis aeruginosa G13-12	1	Chroococcales		guanidine hydrolase pathway		Freshwater
Microcystis aeruginosa K13-05	1	Chroococcales		guanidine hydrolase pathway		Freshwater
Microcystis aeruginosa K13-06	1	Chroococcales		guanidine hydrolase pathway		Freshwater
Microcystis aeruginosa K13-07	1	Chroococcales		guanidine hydrolase pathway		Freshwater
Microcystis aeruginosa K13-10	1	Chroococcales		guanidine hydrolase pathway		Freshwater
Microcystis aeruginosa KLA2	1	Chroococcales		guanidine hydrolase pathway		Freshwater
Microcystis aeruginosa KW	1	Chroococcales		guanidine hydrolase pathway		Freshwater
Microcystis aeruginosa L111-01	1	Chroococcales		guanidine hydrolase pathway		Freshwater
Microcystis aeruginosa L211-07	1	Chroococcales		guanidine hydrolase pathway		Freshwater
Microcystis aeruginosa L211-101	1	Chroococcales		guanidine hydrolase pathway		Freshwater
Microcystis aeruginosa L211-11	1	Chroococcales		guanidine hydrolase pathway		Freshwater
Microcystis aeruginosa L311-01	1	Chroococcales		guanidine hydrolase pathway		Freshwater
Microcystis aeruginosa LE13-04	1	Chroococcales		guanidine hydrolase pathway		Freshwater
Microcystis aeruginosa LE3	1	Chroococcales		guanidine hydrolase pathway		Freshwater
Microcystis aeruginosa LEGE 00239	1	Chroococcales		guanidine hydrolase pathway		Freshwater
Microcystis aeruginosa LG13-11	1	Chroococcales		guanidine hydrolase pathway		Freshwater
Microcystis aeruginosa LL11-07	1	Chroococcales		guanidine hydrolase pathway		Freshwater
Microcystis aeruginosa LL13-03	1	Chroococcales		guanidine hydrolase pathway		Freshwater
Microcystis aeruginosa LL13-06	1	Chroococcales		guanidine hydrolase pathway		Freshwater
Microcystis aeruginosa Ma AC P 19900807 S300	1	Chroococcales		guanidine hydrolase pathway		Freshwater
Microcystis aeruginosa Ma MB F 20061100 S19	1	Chroococcales		guanidine hydrolase pathway		Freshwater
Microcystis aeruginosa Ma MB F 20061100 S19D	1	Chroococcales		guanidine hydrolase pathway		Freshwater
Microcystis aeruginosa Ma MB F 20061100 S20	1	Chroococcales		guanidine hydrolase pathway		Freshwater
Microcystis aeruginosa Ma MB F 20061100 S20D	1	Chroococcales		guanidine hydrolase pathway		Freshwater
Microcystis aeruginosa Ma MB S 20031200 S102	1	Chroococcales		guanidine hydrolase pathway		Freshwater
Microcystis aeruginosa Ma MB S 20031200 S102D	1	Chroococcales		guanidine hydrolase pathway		Freshwater
Microcystis aeruginosa Ma OC H 19870700 S124	1	Chroococcales		guanidine hydrolase pathway		Freshwater
Microcystis aeruginosa Ma OC LR 19540900 S633	1	Chroococcales		guanidine hydrolase pathway		Freshwater
Microcystis aeruginosa Ma QC B 20070730 S2	1	Chroococcales		guanidine hydrolase pathway		Freshwater
Microcystis aeruginosa Ma QC C 20070703 M131	1	Chroococcales		guanidine hydrolase pathway		Freshwater
Microcystis aeruginosa Ma QC C 20070823 S13	1	Chroococcales		guanidine hydrolase pathway		Freshwater
Microcystis aeruginosa Ma QC C 20070823 S13D	1	Chroococcales		guanidine hydrolase pathway		Freshwater
Microcystis aeruginosa Ma QC Ca 00000000 S207	1	Chroococcales		guanidine hydrolase pathway		Freshwater
Microcystis aeruginosa Ma QC Ch 20071001 M135	1	Chroococcales		guanidine hydrolase pathway		Freshwater
Microcystis aeruginosa Ma QC Ch 20071001 S25	1	Chroococcales		guanidine hydrolase pathway		Freshwater
Microcystis aeruginosa Ma QC Ch 20071001 S25D	1	Chroococcales		guanidine hydrolase pathway		Freshwater
Microcystis aeruginosa Ma SC T 19800800 S464	1	Chroococcales		guanidine hydrolase pathway		Freshwater
Microcystis aeruginosa NaRes975	1	Chroococcales		guanidine hydrolase pathway		Freshwater
Microcystis aeruginosa NIBR18	1	Chroococcales		guanidine hydrolase pathway		Freshwater
Microcystis aeruginosa NIES-2481	1	Chroococcales		guanidine hydrolase pathway		Freshwater
Microcystis aeruginosa NIES-2520	1	Chroococcales		guanidine hydrolase pathway		Freshwater
Microcystis aeruginosa NIES-2521	1	Chroococcales		guanidine hydrolase pathway		Freshwater
Microcystis aeruginosa NIES-2549	1	Chroococcales		guanidine hydrolase pathway		Freshwater
Microcystis aeruginosa NIES-298	1	Chroococcales		guanidine hydrolase pathway		Freshwater
Microcystis aeruginosa NIES-3787	1	Chroococcales		guanidine hydrolase pathway		Freshwater
Microcystis aeruginosa NIES-3804	1	Chroococcales		guanidine hydrolase pathway		Freshwater
Microcystis aeruginosa NIES-3806	1	Chroococcales		guanidine hydrolase pathway		Freshwater
Microcystis aeruginosa NIES-3807	1	Chroococcales		guanidine hydrolase pathway		Freshwater
Microcystis aeruginosa NIES-4285	1	Chroococcales		guanidine hydrolase pathway		Freshwater
Microcystis aeruginosa NIES-4325	1	Chroococcales		guanidine hydrolase pathway		Freshwater
Microcystis aeruginosa NIES-44	1	Chroococcales		guanidine hydrolase pathway		Freshwater
Microcystis aeruginosa NIES-843	1	Chroococcales		guanidine hydrolase pathway		Freshwater
Microcystis aeruginosa NIES-88	1	Chroococcales		guanidine hydrolase pathway		Freshwater
Microcystis aeruginosa NIES-98	1	Chroococcales		guanidine hydrolase pathway		Freshwater
Microcystis aeruginosa PCC 7005	1	Chroococcales		guanidine hydrolase pathway		Freshwater
Microcystis aeruginosa PCC 7806SL	1	Chroococcales		guanidine hydrolase pathway		Freshwater
Microcystis aeruginosa PCC 7941	1	Chroococcales		guanidine hydrolase pathway		Freshwater
Microcystis aeruginosa PCC 9432	1	Chroococcales		guanidine hydrolase pathway		Freshwater
Microcystis aeruginosa PCC 9717	1	Chroococcales		guanidine hydrolase pathway		Freshwater
Microcystis aeruginosa PCC 9806	1	Chroococcales		guanidine hydrolase pathway		Freshwater
Microcystis aeruginosa PCC 9807	1	Chroococcales		guanidine hydrolase pathway		Freshwater
Microcystis aeruginosa PCC 9808	1	Chroococcales		guanidine hydrolase pathway		Freshwater
Microcystis aeruginosa PCC 9809	1	Chroococcales		guanidine hydrolase pathway		Freshwater
Microcystis aeruginosa PMC 728.11	1	Chroococcales		guanidine hydrolase pathway		Freshwater
Microcystis aeruginosa S11-01	1	Chroococcales		guanidine hydrolase pathway		Freshwater
Microcystis aeruginosa S11-05	1	Chroococcales		guanidine hydrolase pathway		Freshwater
Microcystis aeruginosa Sj	1	Chroococcales		guanidine hydrolase pathway		Freshwater
Microcystis aeruginosa SPC777	1	Chroococcales		guanidine hydrolase pathway		Freshwater
Microcystis aeruginosa SX13-01	1	Chroococcales		guanidine hydrolase pathway		Freshwater
Microcystis aeruginosa SX13-11	1	Chroococcales		guanidine hydrolase pathway		Freshwater
Microcystis aeruginosa TAIHU98	1	Chroococcales		guanidine hydrolase pathway		Freshwater
Microcystis aeruginosa W11-03	1	Chroococcales		guanidine hydrolase pathway		Freshwater
Microcystis aeruginosa W11-06	1	Chroococcales		guanidine hydrolase pathway		Freshwater
Microcystis aeruginosa W13-13	1	Chroococcales		guanidine hydrolase pathway		Freshwater
Microcystis aeruginosa W13-15	1	Chroococcales		guanidine hydrolase pathway		Freshwater
Microcystis aeruginosa W13-16	1	Chroococcales		guanidine hydrolase pathway		Freshwater
Microcystis aeruginosa W13-18	1	Chroococcales		guanidine hydrolase pathway		Freshwater
Microcystis elabens FACHB-917	1	Chroococcales		guanidine hydrolase pathway		Freshwater
Microcystis flos-aquae DF17	1	Chroococcales		guanidine hydrolase pathway		Freshwater
Microcystis flos-aquae FACHB-1344	1	Chroococcales		guanidine hydrolase pathway		Freshwater
Microcystis flos-aquae Ma QC C 20070823 S18D	1	Chroococcales		guanidine hydrolase pathway		Freshwater
Microcystis flos-aquae Mf QC C 20070823 S10	1	Chroococcales		guanidine hydrolase pathway		Freshwater
Microcystis flos-aquae Mf QC C 20070823 S10D	1	Chroococcales		guanidine hydrolase pathway		Freshwater
Microcystis flos-aquae Mf QC C 20070823 S20	1	Chroococcales		guanidine hydrolase pathway		Freshwater
Microcystis flos-aquae Mf QC C 20070823 S20D	1	Chroococcales		guanidine hydrolase pathway		Freshwater
Microcystis flos-aquae Mf QC C 20070823 S20T	1	Chroococcales		guanidine hydrolase pathway		Freshwater
Microcystis flos-aquae Mf WU F 19750830 S460	1	Chroococcales		guanidine hydrolase pathway		Freshwater
Microcystis flos-aquae TF09	1	Chroococcales		guanidine hydrolase pathway		Freshwater
Microcystis novacekii Mn MB F 20050700 S1	1	Chroococcales		guanidine hydrolase pathway		Freshwater
Microcystis novacekii Mn MB F 20050700 S1D	1	Chroococcales		guanidine hydrolase pathway		Freshwater
Microcystis panniformis FACHB-1757	1	Chroococcales		guanidine hydrolase pathway		Freshwater
Microcystis panniformis Mp GB SS 20050300 S99	1	Chroococcales		guanidine hydrolase pathway		Freshwater
Microcystis panniformis Mp GB SS 20050300 S99D	1	Chroococcales		guanidine hydrolase pathway		Freshwater
Microcystis panniformis Mp MB F 20051200 S6	1	Chroococcales		guanidine hydrolase pathway		Freshwater
Microcystis panniformis Mp MB F 20051200 S6D	1	Chroococcales		guanidine hydrolase pathway		Freshwater
Microcystis panniformis Mp MB F 20051200 S9	1	Chroococcales		guanidine hydrolase pathway		Freshwater
Microcystis panniformis Mp MB F 20051200 S9D	1	Chroococcales		guanidine hydrolase pathway		Freshwater
Microcystis panniformis Mp MB F 20080800 S26	1	Chroococcales		guanidine hydrolase pathway		Freshwater
Microcystis panniformis Mp MB F 20080800 S26D	1	Chroococcales		guanidine hydrolase pathway		Freshwater
Microcystis panniformis NKJ.11	1	Chroococcales		guanidine hydrolase pathway		Freshwater
Microcystis sp. 0824	1	Chroococcales		guanidine hydrolase pathway		Freshwater
Microcystis sp. 49638 E5	1	Chroococcales		guanidine hydrolase pathway		Freshwater
Microcystis sp. 53598 E5	1	Chroococcales		guanidine hydrolase pathway		Freshwater
Microcystis sp. 53602 E8	1	Chroococcales		guanidine hydrolase pathway		Freshwater
Microcystis sp. LEGE 00066	1	Chroococcales		guanidine hydrolase pathway		Freshwater
Microcystis sp. LSC13-02	1	Chroococcales		guanidine hydrolase pathway		Freshwater
Microcystis sp. M OC Ca 00000000 C217Col	1	Chroococcales		guanidine hydrolase pathway		Freshwater
Microcystis sp. M OC Ca 00000000 S217Cul	1	Chroococcales		guanidine hydrolase pathway		Freshwater
Microcystis sp. M QC C 20170808 M2Col	1	Chroococcales		guanidine hydrolase pathway		Freshwater
Microcystis sp. M QC C 20170808 M3Col	1	Chroococcales		guanidine hydrolase pathway		Freshwater
Microcystis sp. M QC C 20170808 M9Col	1	Chroococcales		guanidine hydrolase pathway		Freshwater
Microcystis sp. M005S1	1	Chroococcales		guanidine hydrolase pathway		Freshwater
Microcystis sp. M007S1	1	Chroococcales		guanidine hydrolase pathway		Freshwater
Microcystis sp. M010S1	1	Chroococcales		guanidine hydrolase pathway		Freshwater
Microcystis sp. M011S1	1	Chroococcales		guanidine hydrolase pathway		Freshwater
Microcystis sp. M015S1	1	Chroococcales		guanidine hydrolase pathway		Freshwater
Microcystis sp. M015S2	1	Chroococcales		guanidine hydrolase pathway		Freshwater
Microcystis sp. M017S1	1	Chroococcales		guanidine hydrolase pathway		Freshwater
Microcystis sp. M018S1	1	Chroococcales		guanidine hydrolase pathway		Freshwater
Microcystis sp. M020S1	1	Chroococcales		guanidine hydrolase pathway		Freshwater
Microcystis sp. M022S1	1	Chroococcales		guanidine hydrolase pathway		Freshwater
Microcystis sp. M025S2	1	Chroococcales		guanidine hydrolase pathway		Freshwater
Microcystis sp. M034S1	1	Chroococcales		guanidine hydrolase pathway		Freshwater
Microcystis sp. M034S2	1	Chroococcales		guanidine hydrolase pathway		Freshwater
Microcystis sp. M035S1	1	Chroococcales		guanidine hydrolase pathway		Freshwater
Microcystis sp. M037S2	1	Chroococcales		guanidine hydrolase pathway		Freshwater
Microcystis sp. M038S1	1	Chroococcales		guanidine hydrolase pathway		Freshwater
Microcystis sp. M038S2	1	Chroococcales		guanidine hydrolase pathway		Freshwater
Microcystis sp. M039S1	1	Chroococcales		guanidine hydrolase pathway		Freshwater
Microcystis sp. M040S2	1	Chroococcales		guanidine hydrolase pathway		Freshwater
Microcystis sp. M042S1	1	Chroococcales		guanidine hydrolase pathway		Freshwater
Microcystis sp. M043S1	1	Chroococcales		guanidine hydrolase pathway		Freshwater
Microcystis sp. M043S2	1	Chroococcales		guanidine hydrolase pathway		Freshwater
Microcystis sp. M045S1	1	Chroococcales		guanidine hydrolase pathway		Freshwater
Microcystis sp. M045S2	1	Chroococcales		guanidine hydrolase pathway		Freshwater
Microcystis sp. M046S1	1	Chroococcales		guanidine hydrolase pathway		Freshwater
Microcystis sp. M046S2	1	Chroococcales		guanidine hydrolase pathway		Freshwater
Microcystis sp. M048S1	1	Chroococcales		guanidine hydrolase pathway		Freshwater
Microcystis sp. M049S1	1	Chroococcales		guanidine hydrolase pathway		Freshwater
Microcystis sp. M04BS1	1	Chroococcales		guanidine hydrolase pathway		Freshwater
Microcystis sp. M051S1	1	Chroococcales		guanidine hydrolase pathway		Freshwater
Microcystis sp. M054S2	1	Chroococcales		guanidine hydrolase pathway		Freshwater
Microcystis sp. M055S1	1	Chroococcales		guanidine hydrolase pathway		Freshwater
Microcystis sp. M058S1	1	Chroococcales		guanidine hydrolase pathway		Freshwater
Microcystis sp. M061S2	1	Chroococcales		guanidine hydrolase pathway		Freshwater
Microcystis sp. M064S2	1	Chroococcales		guanidine hydrolase pathway		Freshwater
Microcystis sp. M065S1	1	Chroococcales		guanidine hydrolase pathway		Freshwater
Microcystis sp. M065S2	1	Chroococcales		guanidine hydrolase pathway		Freshwater
Microcystis sp. M069S2	1	Chroococcales		guanidine hydrolase pathway		Freshwater
Microcystis sp. M074S1	1	Chroococcales		guanidine hydrolase pathway		Freshwater
Microcystis sp. M076S1	1	Chroococcales		guanidine hydrolase pathway		Freshwater
Microcystis sp. M078S1	1	Chroococcales		guanidine hydrolase pathway		Freshwater
Microcystis sp. M079S1	1	Chroococcales		guanidine hydrolase pathway		Freshwater
Microcystis sp. M080S2	1	Chroococcales		guanidine hydrolase pathway		Freshwater
Microcystis sp. M083S1	1	Chroococcales		guanidine hydrolase pathway		Freshwater
Microcystis sp. M085S1	1	Chroococcales		guanidine hydrolase pathway		Freshwater
Microcystis sp. M086S1	1	Chroococcales		guanidine hydrolase pathway		Freshwater
Microcystis sp. M087S2	1	Chroococcales		guanidine hydrolase pathway		Freshwater
Microcystis sp. M088S1	1	Chroococcales		guanidine hydrolase pathway		Freshwater
Microcystis sp. M090S1	1	Chroococcales		guanidine hydrolase pathway		Freshwater
Microcystis sp. M091S2	1	Chroococcales		guanidine hydrolase pathway		Freshwater
Microcystis sp. M095S1	1	Chroococcales		guanidine hydrolase pathway		Freshwater
Microcystis sp. M099S2	1	Chroococcales		guanidine hydrolase pathway		Freshwater
Microcystis sp. M100S2	1	Chroococcales		guanidine hydrolase pathway		Freshwater
Microcystis sp. M109S1	1	Chroococcales		guanidine hydrolase pathway		Freshwater
Microcystis sp. M110S1	1	Chroococcales		guanidine hydrolase pathway		Freshwater
Microcystis sp. M112S1	1	Chroococcales		guanidine hydrolase pathway		Freshwater
Microcystis sp. M112S2	1	Chroococcales		guanidine hydrolase pathway		Freshwater
Microcystis sp. M113S1	1	Chroococcales		guanidine hydrolase pathway		Freshwater
Microcystis sp. M113S2	1	Chroococcales		guanidine hydrolase pathway		Freshwater
Microcystis sp. M114S2	1	Chroococcales		guanidine hydrolase pathway		Freshwater
Microcystis sp. M116S2	1	Chroococcales		guanidine hydrolase pathway		Freshwater
Microcystis sp. M122S2	1	Chroococcales		guanidine hydrolase pathway		Freshwater
Microcystis sp. M125S2	1	Chroococcales		guanidine hydrolase pathway		Freshwater
Microcystis sp. M135S2	1	Chroococcales		guanidine hydrolase pathway		Freshwater
Microcystis sp. M136S2	1	Chroococcales		guanidine hydrolase pathway		Freshwater
Microcystis sp. M137S2	1	Chroococcales		guanidine hydrolase pathway		Freshwater
Microcystis sp. M144S2	1	Chroococcales		guanidine hydrolase pathway		Freshwater
Microcystis sp. M145S2	1	Chroococcales		guanidine hydrolase pathway		Freshwater
Microcystis sp. M151S2	1	Chroococcales		guanidine hydrolase pathway		Freshwater
Microcystis sp. M152S2	1	Chroococcales		guanidine hydrolase pathway		Freshwater
Microcystis sp. M155S2	1	Chroococcales		guanidine hydrolase pathway		Freshwater
Microcystis sp. M158S2	1	Chroococcales		guanidine hydrolase pathway		Freshwater
Microcystis sp. M162S2	1	Chroococcales		guanidine hydrolase pathway		Freshwater
Microcystis sp. M165S2	1	Chroococcales		guanidine hydrolase pathway		Freshwater
Microcystis sp. M166S2	1	Chroococcales		guanidine hydrolase pathway		Freshwater
Microcystis sp. M172S2	1	Chroococcales		guanidine hydrolase pathway		Freshwater
Microcystis sp. M176S2	1	Chroococcales		guanidine hydrolase pathway		Freshwater
Microcystis sp. M179S2	1	Chroococcales		guanidine hydrolase pathway		Freshwater
Microcystis sp. M18BS1	1	Chroococcales		guanidine hydrolase pathway		Freshwater
Microcystis sp. M19BS1	1	Chroococcales		guanidine hydrolase pathway		Freshwater
Microcystis sp. M20BS1	1	Chroococcales		guanidine hydrolase pathway		Freshwater
Microcystis sp. M25BS1	1	Chroococcales		guanidine hydrolase pathway		Freshwater
Microcystis sp. M26BS1	1	Chroococcales		guanidine hydrolase pathway		Freshwater
Microcystis sp. M27BS1	1	Chroococcales		guanidine hydrolase pathway		Freshwater
Microcystis sp. M29BS1	1	Chroococcales		guanidine hydrolase pathway		Freshwater
Microcystis sp. M31BS1	1	Chroococcales		guanidine hydrolase pathway		Freshwater
Microcystis sp. M34BS1	1	Chroococcales		guanidine hydrolase pathway		Freshwater
Microcystis sp. M38BS1	1	Chroococcales		guanidine hydrolase pathway		Freshwater
Microcystis sp. M39BS1	1	Chroococcales		guanidine hydrolase pathway		Freshwater
Microcystis sp. M40BS1	1	Chroococcales		guanidine hydrolase pathway		Freshwater
Microcystis sp. M41BS1	1	Chroococcales		guanidine hydrolase pathway		Freshwater
Microcystis sp. M42BS1	1	Chroococcales		guanidine hydrolase pathway		Freshwater
Microcystis sp. M43BS1	1	Chroococcales		guanidine hydrolase pathway		Freshwater
Microcystis sp. M44BS1	1	Chroococcales		guanidine hydrolase pathway		Freshwater
Microcystis sp. M51BS1	1	Chroococcales		guanidine hydrolase pathway		Freshwater
Microcystis sp. M53BS1	1	Chroococcales		guanidine hydrolase pathway		Freshwater
Microcystis sp. M54BS1	1	Chroococcales		guanidine hydrolase pathway		Freshwater
Microcystis sp. M55BS1	1	Chroococcales		guanidine hydrolase pathway		Freshwater
Microcystis sp. M57BS1	1	Chroococcales		guanidine hydrolase pathway		Freshwater
Microcystis sp. M59BS1	1	Chroococcales		guanidine hydrolase pathway		Freshwater
Microcystis sp. M60BS1	1	Chroococcales		guanidine hydrolase pathway		Freshwater
Microcystis sp. M61BS1	1	Chroococcales		guanidine hydrolase pathway		Freshwater
Microcystis sp. M62BS1	1	Chroococcales		guanidine hydrolase pathway		Freshwater
Microcystis sp. M63BS1	1	Chroococcales		guanidine hydrolase pathway		Freshwater
Microcystis sp. Msp OC L 20101000 S702	1	Chroococcales		guanidine hydrolase pathway		Freshwater
Microcystis viridis FACHB-1342	1	Chroococcales		guanidine hydrolase pathway		Freshwater
Microcystis viridis Mv BB P 19951000 S68	1	Chroococcales		guanidine hydrolase pathway		Freshwater
Microcystis viridis Mv BB P 19951000 S68D	1	Chroococcales		guanidine hydrolase pathway		Freshwater
Microcystis viridis Mv BB P 19951000 S69	1	Chroococcales		guanidine hydrolase pathway		Freshwater
Microcystis viridis Mv BB P 19951000 S69D	1	Chroococcales		guanidine hydrolase pathway		Freshwater
Microcystis viridis NIES-102	1	Chroococcales		guanidine hydrolase pathway		Freshwater
Microcystis wesenbergii FACHB-1339	1	Chroococcales		guanidine hydrolase pathway		Freshwater
Microcystis wesenbergii LE013-01	1	Chroococcales		guanidine hydrolase pathway		Freshwater
Microcystis wesenbergii Mw QC B 20070930 S4	1	Chroococcales		guanidine hydrolase pathway		Freshwater
Microcystis wesenbergii Mw QC B 20070930 S4D	1	Chroococcales		guanidine hydrolase pathway		Freshwater
Microcystis wesenbergii Mw QC S 20081001 S30	1	Chroococcales		guanidine hydrolase pathway		Freshwater
Microcystis wesenbergii Mw QC S 20081001 S30D	1	Chroococcales		guanidine hydrolase pathway		Freshwater
Microcystis wesenbergii TW10	1	Chroococcales		guanidine hydrolase pathway		Freshwater
Microseira wollei NIES-4236	1	Oscillatoriales		guanidine hydrolase pathway		Freshwater
Myxosarcina sp. GA_180221_E-1-2-MAG-39_37	1	Pleurocapsales		guanidine hydrolase pathway		Freshwater
Myxosarcina sp. GA_180221_E-2-1-MAG-40_15	1	Pleurocapsales		guanidine hydrolase pathway		Freshwater
Neosynechococcus sphagnicola sy1	1	Pseudanabaenales		guanidine hydrolase pathway		Freshwater
Nodosilinea sp. CSSed162cmB_84	1	Pseudanabaenales		guanidine hydrolase pathway		Freshwater
Nodosilinea sp. P-1105	1	Pseudanabaenales		guanidine hydrolase pathway		Freshwater
Nostoc sp. WHI	1	Nostocales		guanidine hydrolase pathway		Freshwater
Oscillatoria princeps RMCB-10	1	Oscillatoriales		guanidine hydrolase pathway		Freshwater
Oscillatoria sp. FACHB-1407	1	Oscillatoriales		guanidine hydrolase pathway		Freshwater
Oscillatoriales cyanobacterium MTP1	1	Oscillatoriales		guanidine hydrolase pathway		Freshwater
Pantanalinema sp. GBBB05	1	Pseudanabaenales		guanidine hydrolase pathway		Freshwater
Phormidium sp. Bin_1	1	Oscillatoriales		guanidine hydrolase pathway		Freshwater
Phormidium sp. BM_Day4_Bin.17	1	Oscillatoriales		guanidine hydrolase pathway		Freshwater
Planktothrix agardhii 1025	1	Oscillatoriales		guanidine hydrolase pathway		Freshwater
Planktothrix agardhii 1026	1	Oscillatoriales		guanidine hydrolase pathway		Freshwater
Planktothrix agardhii 1027	1	Oscillatoriales		guanidine hydrolase pathway		Freshwater
Planktothrix agardhii 1029	1	Oscillatoriales		guanidine hydrolase pathway		Freshwater
Planktothrix agardhii 1030	1	Oscillatoriales		guanidine hydrolase pathway		Freshwater
Planktothrix agardhii 1031	1	Oscillatoriales		guanidine hydrolase pathway		Freshwater
Planktothrix agardhii 1032	1	Oscillatoriales		guanidine hydrolase pathway		Freshwater
Planktothrix agardhii 1033	1	Oscillatoriales		guanidine hydrolase pathway		Freshwater
Planktothrix agardhii 1801	1	Oscillatoriales		guanidine hydrolase pathway		Freshwater
Planktothrix agardhii 1803	1	Oscillatoriales		guanidine hydrolase pathway		Freshwater
Planktothrix agardhii 1804	1	Oscillatoriales		guanidine hydrolase pathway		Freshwater
Planktothrix agardhii 1805	1	Oscillatoriales		guanidine hydrolase pathway		Freshwater
Planktothrix agardhii 1806	1	Oscillatoriales		guanidine hydrolase pathway		Freshwater
Planktothrix agardhii 1807	1	Oscillatoriales		guanidine hydrolase pathway		Freshwater
Planktothrix agardhii 1808	1	Oscillatoriales		guanidine hydrolase pathway		Freshwater
Planktothrix agardhii 1809	1	Oscillatoriales		guanidine hydrolase pathway		Freshwater
Planktothrix agardhii 1810	1	Oscillatoriales		guanidine hydrolase pathway		Freshwater
Planktothrix agardhii 1811	1	Oscillatoriales		guanidine hydrolase pathway		Freshwater
Planktothrix agardhii 1812	1	Oscillatoriales		guanidine hydrolase pathway		Freshwater
Planktothrix agardhii 1813	1	Oscillatoriales		guanidine hydrolase pathway		Freshwater
Planktothrix agardhii Bin4	1	Oscillatoriales		guanidine hydrolase pathway		Freshwater
Planktothrix agardhii CCAP 1459/11A	1	Oscillatoriales		guanidine hydrolase pathway		Freshwater
Planktothrix agardhii KL2	1	Oscillatoriales		guanidine hydrolase pathway		Freshwater
Planktothrix agardhii NIES-204	1	Oscillatoriales		guanidine hydrolase pathway		Freshwater
Planktothrix agardhii NIVA-CYA 126	1	Oscillatoriales		guanidine hydrolase pathway		Freshwater
Planktothrix agardhii NIVA-CYA 15	1	Oscillatoriales		guanidine hydrolase pathway		Freshwater
Planktothrix agardhii NIVA-CYA 34	1	Oscillatoriales		guanidine hydrolase pathway		Freshwater
Planktothrix agardhii NIVA-CYA 56 3	1	Oscillatoriales		guanidine hydrolase pathway		Freshwater
Planktothrix mougeotii NIVA-CYA 405	1	Oscillatoriales		guanidine hydrolase pathway		Freshwater
Planktothrix prolifica NIVA-CYA 406	1	Oscillatoriales		guanidine hydrolase pathway		Freshwater
Planktothrix prolifica NIVA-CYA 540	1	Oscillatoriales		guanidine hydrolase pathway		Freshwater
Planktothrix prolifica NIVA-CYA 98	1	Oscillatoriales		guanidine hydrolase pathway		Freshwater
Planktothrix rubescens NIVA-CYA 18	1	Oscillatoriales		guanidine hydrolase pathway		Freshwater
Planktothrix rubescens NIVA-CYA 407	1	Oscillatoriales		guanidine hydrolase pathway		Freshwater
Planktothrix sp. FACHB-1355	1	Oscillatoriales		guanidine hydrolase pathway		Freshwater
Planktothrix sp. FACHB-1375	1	Oscillatoriales		guanidine hydrolase pathway		Freshwater
Pleurocapsa sp. CCALA 161	1	Pleurocapsales		guanidine hydrolase pathway		Freshwater
Pleurocapsa sp. GA 180221 E-1-1-MAG-40 19	1	Pleurocapsales		guanidine hydrolase pathway		Freshwater
Pleurocapsa sp. PCC 7319	1	Pleurocapsales		guanidine hydrolase pathway		Freshwater
Pleurocapsa sp. PCC 7327	1	Pleurocapsales		guanidine hydrolase pathway		Freshwater
Spirulina major PCC 6313	1	Spirulinales		guanidine hydrolase pathway		Freshwater
Spirulina sp isolate S17.Bin059	1	Spirulinales		guanidine hydrolase pathway		Freshwater
Synechococcaceae bacterium WB9_2_112	1	Synechococcales		guanidine hydrolase pathway		Freshwater
Synechococcaceae bacterium WB9_4xB_025	1	Synechococcales		guanidine hydrolase pathway		Freshwater
Synechococcales bacterium UBA10510	1	Synechococcales		guanidine hydrolase pathway		Freshwater
Synechococcales cyanobacterium C42_A2020_086	1	Synechococcales		guanidine hydrolase pathway		Freshwater
Synechococcales cyanobacterium M55_K2018_004	1	Synechococcales		guanidine hydrolase pathway		Freshwater
Synechocystis sp. PCC 6714	1	Synechococcales		guanidine hydrolase pathway		Freshwater
Synechocystis sp. PCC 6803	1	Synechococcales		guanidine hydrolase pathway		Freshwater
Thermoleptolyngbya sp. C42_A2020_037	1	Pseudanabaenales		guanidine hydrolase pathway		Freshwater
Thermoleptolyngbya sp. M55_K2018_002	1	Pseudanabaenales		guanidine hydrolase pathway		Freshwater
Thermosynechococcaceae cyanobacterium MS004	1	Pseudanabaenales		guanidine hydrolase pathway		Freshwater
Anthocerotibacter panamensis C109	1	Gloeobacterales		guanidine hydrolase pathway		Host-associated
Baaleninema simplex PCC 7105	1	Oscillatoriales		guanidine hydrolase pathway		Host-associated
Candidatus Synechococcus spongiarum LMB bulk15M	1	Synechococcales		guanidine hydrolase pathway		Host-associated
Candidatus Synechococcus spongiarum LMB bulk15N	1	Synechococcales		guanidine hydrolase pathway		Host-associated
Candidatus Synechococcus spongiarum SH4	1	Synechococcales		guanidine hydrolase pathway		Host-associated
Cyanobacterium aponinum 0216	1	Chroococcales		guanidine hydrolase pathway		Host-associated
Komarekiella delphini-convector SJRDD-AB1	1	Nostocales		guanidine hydrolase pathway		Host-associated
Leptolyngbyaceae cyanobacterium MAG.088	1	Pseudanabaenales		guanidine hydrolase pathway		Host-associated
Leptothoe kymatousa TAU-MAC 1615	1	Pseudanabaenales		guanidine hydrolase pathway		Host-associated
Leptolyngbyaceae cyanobacterium RM1_406_9	1	Pseudanabaenales		guanidine hydrolase pathway		Intertidal zone
Leptolyngbyaceae cyanobacterium RM2_2_4	1	Pseudanabaenales		guanidine hydrolase pathway		Intertidal zone
Leptolyngbyaceae cyanobacterium RU_5_1	1	Pseudanabaenales		guanidine hydrolase pathway		Intertidal zone
Leptolyngbyaceae cyanobacterium SL 5 14	1	Pseudanabaenales		guanidine hydrolase pathway		Intertidal zone
Leptolyngbyaceae cyanobacterium SL_5_9	1	Pseudanabaenales		guanidine hydrolase pathway		Intertidal zone
Leptolyngbyaceae cyanobacterium SL_7_1	1	Pseudanabaenales		guanidine hydrolase pathway		Intertidal zone
Leptolyngbyaceae cyanobacterium SM1_3_5	1	Pseudanabaenales		guanidine hydrolase pathway		Intertidal zone
Leptolyngbyaceae cyanobacterium SM1_4_3	1	Pseudanabaenales		guanidine hydrolase pathway		Intertidal zone
Lusitaniella coriacea LEGE 07157	1	Pseudanabaenales		guanidine hydrolase pathway		Intertidal zone
Microcoleus sp. SM1_3_4	1	Oscillatoriales		guanidine hydrolase pathway		Intertidal zone
Microcoleus sp. SU_5_6	1	Oscillatoriales		guanidine hydrolase pathway		Intertidal zone
Oculatella sp. LEGE 06141	1	Pseudanabaenales		guanidine hydrolase pathway		Intertidal zone
Oscillatoriales cyanobacterium RU_3_3	1	Oscillatoriales		guanidine hydrolase pathway		Intertidal zone
Oxynema aestuarii AP17	1	Oscillatoriales		guanidine hydrolase pathway		Intertidal zone
Oxynema sp. CENA135	1	Oscillatoriales		guanidine hydrolase pathway		Intertidal zone
Phormidesmis sp. RL 2 1	1	Pseudanabaenales		guanidine hydrolase pathway		Intertidal zone
Pleurocapsa sp. CRU_1_2	1	Pleurocapsales		guanidine hydrolase pathway		Intertidal zone
Pleurocapsa sp. SU_5_0	1	Pleurocapsales		guanidine hydrolase pathway		Intertidal zone
Pleurocapsales cyanobacterium LEGE 10410	1	Pleurocapsales		guanidine hydrolase pathway		Intertidal zone
Richelia sp. CSU_2_1	1	Nostocales		guanidine hydrolase pathway		Intertidal zone
Romeria aff. gracilis LEGE 07310	1	Pseudanabaenales		guanidine hydrolase pathway		Intertidal zone
Spirulinaceae cyanobacterium RM2_2_10	1	Spirulinales		guanidine hydrolase pathway		Intertidal zone
Spirulinaceae cyanobacterium SM2 1 0	1	Spirulinales		guanidine hydrolase pathway		Intertidal zone
Synechococcaceae cyanobacterium RL_1_2	1	Synechococcales		guanidine hydrolase pathway		Intertidal zone
Synechococcaceae cyanobacterium RM1_1_27	1	Synechococcales		guanidine hydrolase pathway		Intertidal zone
Synechococcaceae cyanobacterium SM2_3_1	1	Synechococcales		guanidine hydrolase pathway		Intertidal zone
Synechococcaceae cyanobacterium SM2_3_2	1	Synechococcales		guanidine hydrolase pathway		Intertidal zone
Acaryochloris sp. CCMEE 5410	1	Synechococcales		guanidine hydrolase pathway		Marine
Acaryochloris sp. CRU_2_0	1	Synechococcales		guanidine hydrolase pathway		Marine
Acaryochloris sp. RU_4_1	1	Synechococcales		guanidine hydrolase pathway		Marine
Adonisia turfae CCMR0081	1	Pseudanabaenales		guanidine hydrolase pathway		Marine
Adonisia turfae CCMR0082	1	Pseudanabaenales		guanidine hydrolase pathway		Marine
Aliterella atlantica CENA595	1	Chroococcidiopsidales		guanidine hydrolase pathway		Marine
Aphanocapsa feldmannii 277cI	1	Synechococcales		guanidine hydrolase pathway		Marine
Aphanocapsa feldmannii 277cV	1	Synechococcales		guanidine hydrolase pathway		Marine
Aphanocapsa feldmannii 288cV	1	Synechococcales		guanidine hydrolase pathway		Marine
Candidatus Synechococcus spongiarum 142	1	Synechococcales		guanidine hydrolase pathway		Marine
Candidatus Synechococcus spongiarum 15L	1	Synechococcales		guanidine hydrolase pathway		Marine
Candidatus Synechococcus spongiarum SP3	1	Synechococcales		guanidine hydrolase pathway		Marine
Coleofasciculaceae cyanobacterium RL_1_1	1	Oscillatoriales		guanidine hydrolase pathway		Marine
Coleofasciculus chthonoplastes PCC 7420	1	Oscillatoriales		guanidine hydrolase pathway		Marine
Coleofasciculus sp. LEGE 07081	1	Oscillatoriales		guanidine hydrolase pathway		Marine
Coleofasciculus sp. LEGE 07092	1	Oscillatoriales		guanidine hydrolase pathway		Marine
Cyanobacterium aponinum FACHB-4101	1	Chroococcales		guanidine hydrolase pathway		Marine
Cyanobium sp. LEGE 06113	1	Synechococcales		guanidine hydrolase pathway		Marine
Cyanobium sp. LEGE 06143	1	Synechococcales		guanidine hydrolase pathway		Marine
Cyanobium sp. NIES-981	1	Synechococcales		guanidine hydrolase pathway		Marine
Cyanobium sp. NS01	1	Synechococcales		guanidine hydrolase pathway		Marine
Cyanobium sp. PCC 7001	1	Synechococcales		guanidine hydrolase pathway		Marine
Desertifilum sp. SIO1I2	1	Oscillatoriales		guanidine hydrolase pathway		Marine
filamentous cyanobacterium ESFC-1	1	Oscillatoriales		guanidine hydrolase pathway		Marine
filamentous cyanobacterium LEGE 07170	1	Oscillatoriales		guanidine hydrolase pathway		Marine
Geitlerinema sp. BBD 1991-9	1	Oscillatoriales		guanidine hydrolase pathway		Marine
Halomicronema hongdechloris C2206	1	Pseudanabaenales		guanidine hydrolase pathway		Marine
Hydrococcus sp. CRU_1_1	1	Pleurocapsales		guanidine hydrolase pathway		Marine
Hydrococcus sp. CSU_1_8	1	Pleurocapsales		guanidine hydrolase pathway		Marine
Hydrococcus sp. RM1_1_31	1	Pleurocapsales		guanidine hydrolase pathway		Marine
Hydrococcus sp. RU_2_2	1	Pleurocapsales		guanidine hydrolase pathway		Marine
Hydrococcus sp. SU_1_0	1	Pleurocapsales		guanidine hydrolase pathway		Marine
Hyella patelloides LEGE 07179	1	Pleurocapsales		guanidine hydrolase pathway		Marine
Hyellaceae cyanobacterium CSU_1_1	1	Pleurocapsales		guanidine hydrolase pathway		Marine
Kamptonema sp. SIO1D9	1	Oscillatoriales		guanidine hydrolase pathway		Marine
Leptolyngbya sp. PCC 7375	1	Pseudanabaenales		guanidine hydrolase pathway		Marine
Leptolyngbya sp. SIO1E4	1	Pseudanabaenales		guanidine hydrolase pathway		Marine
Leptolyngbya sp. SIO4C1	1	Pseudanabaenales		guanidine hydrolase pathway		Marine
Oscillatoria salina IIICB1	1	Oscillatoriales		guanidine hydrolase pathway		Marine
Oscillatoriales cyanobacterium LEGE 11467	1	Oscillatoriales		guanidine hydrolase pathway		Marine
Parasynechococcus marenigrum WH 8102	1	Synechococcales		guanidine hydrolase pathway		Marine
Phormidium ambiguum IAM M-71	1	Oscillatoriales		guanidine hydrolase pathway		Marine
Prochlorococcaceae cyanobacterium jk18x1bzbins.87	1	Synechococcales		guanidine hydrolase pathway		Marine
Prochlorococcaceae cyanobacterium jk18x22bins.40	1	Synechococcales		guanidine hydrolase pathway		Marine
Prochlorococcaceae cyanobacterium jk18x22bins.65	1	Synechococcales		guanidine hydrolase pathway		Marine
Prochlorococcaceae cyanobacterium jk18x27bins.71	1	Synechococcales		guanidine hydrolase pathway		Marine
Prochlorococcaceae cyanobacterium jk18x7bins.48	1	Synechococcales		guanidine hydrolase pathway		Marine
Prochlorococcaceae cyanobacterium jk18x7bins.84	1	Synechococcales		guanidine hydrolase pathway		Marine
Prochlorococcaceae cyanobacterium jk18x8bins.2	1	Synechococcales		guanidine hydrolase pathway		Marine
Prochlorococcaceae cyanobacterium jk18xAbins.51	1	Synechococcales		guanidine hydrolase pathway		Marine
Prochlorococcaceae cyanobacterium jk18xAbins.61	1	Synechococcales		guanidine hydrolase pathway		Marine
Prochlorococcaceae cyanobacterium p16x34bins.54	1	Synechococcales		guanidine hydrolase pathway		Marine
Prochlorococcaceae cyanobacterium p16x65bins.39	1	Synechococcales		guanidine hydrolase pathway		Marine
Prochlorococcus sp. AG-355-J09	1	Synechococcales		guanidine hydrolase pathway		Marine
Prochlorococcus sp. AG-355-N18	1	Synechococcales		guanidine hydrolase pathway		Marine
Prochlorococcus sp. AG-418-B17	1	Synechococcales		guanidine hydrolase pathway		Marine
Prochlorococcus sp. UBA3999	1	Synechococcales		guanidine hydrolase pathway		Marine
Prochlorococcus sp. UBA7370	1	Synechococcales		guanidine hydrolase pathway		Marine
Pseudanabaenales cyanobacterium MAG.87	1	Pseudanabaenales		guanidine hydrolase pathway		Marine
Roseofilum reptotaenium AO1-A	1	Oscillatoriales		guanidine hydrolase pathway		Marine
Roseofilum reptotaenium RR100-1	1	Oscillatoriales		guanidine hydrolase pathway		Marine
Roseofilum sp. Belize BBD 4	1	Oscillatoriales		guanidine hydrolase pathway		Marine
Roseofilum sp. Belize Diploria	1	Oscillatoriales		guanidine hydrolase pathway		Marine
Roseofilum sp. Guam	1	Oscillatoriales		guanidine hydrolase pathway		Marine
Roseofilum sp. SBFL	1	Oscillatoriales		guanidine hydrolase pathway		Marine
Roseofilum sp. SID1	1	Oscillatoriales		guanidine hydrolase pathway		Marine
Roseofilum sp. SID2	1	Oscillatoriales		guanidine hydrolase pathway		Marine
Roseofilum sp. SID3	1	Oscillatoriales		guanidine hydrolase pathway		Marine
Rubidibacter lacunae KORDI 51-2	1	Chroococcales		guanidine hydrolase pathway		Marine
Spirulina sp. SIO3F2	1	Spirulinales		guanidine hydrolase pathway		Marine
Symploca sp. SIO2C1	1	Oscillatoriales		guanidine hydrolase pathway		Marine
Waterburya agarophytonicola KI4	1	Pleurocapsales		guanidine hydrolase pathway		Marine
Xenococcus sp. PCC 7305	1	Pleurocapsales		guanidine hydrolase pathway		Marine
Allocoleopsis franciscana PCC 7113	1	Oscillatoriales		guanidine hydrolase pathway		Terrestrial
Aphanothece saxicola GSE-SYN-MK-01-06B	1	Chroococcales		guanidine hydrolase pathway		Terrestrial
Aphanothece sp. CMT-3BRIN-NPC111	1	Chroococcales		guanidine hydrolase pathway		Terrestrial
Argonema antarcticum A004/B2	1	Oscillatoriales		guanidine hydrolase pathway		Terrestrial
Chlorogloeopsis fritschii PCC 6912	1	Nostocales		guanidine hydrolase pathway		Terrestrial
Chondrocystis sp. NIES-4102	1	Chroococcales		guanidine hydrolase pathway		Terrestrial
Chroococcidiopsis cubana SAG 39.79	1	Chroococcidiopsidales		guanidine hydrolase pathway		Terrestrial
Chroococcidiopsis thermalis PCC 7203	1	Chroococcidiopsidales		guanidine hydrolase pathway		Terrestrial
Chroococcus sp. CMT-3BRIN-NPC107	1	Chroococcales		guanidine hydrolase pathway		Terrestrial
Coleofasciculus sp. FACHB-125	1	Oscillatoriales		guanidine hydrolase pathway		Terrestrial
Coleofasciculus sp. FACHB-129	1	Oscillatoriales		guanidine hydrolase pathway		Terrestrial
Coleofasciculus sp. FACHB-501	1	Oscillatoriales		guanidine hydrolase pathway		Terrestrial
Coleofasciculus sp. FACHB-542	1	Oscillatoriales		guanidine hydrolase pathway		Terrestrial
Coleofasciculus sp. FACHB-64	1	Oscillatoriales		guanidine hydrolase pathway		Terrestrial
Coleofasciculus sp. FACHB-712	1	Oscillatoriales		guanidine hydrolase pathway		Terrestrial
Coleofasciculus sp. FACHB-SPT36	1	Oscillatoriales		guanidine hydrolase pathway		Terrestrial
Coleofasciculus sp. FACHB-SPT9	1	Oscillatoriales		guanidine hydrolase pathway		Terrestrial
Coleofasciculus sp. FACHB-T130	1	Oscillatoriales		guanidine hydrolase pathway		Terrestrial
Fischerella sp. NIES-4106	1	Nostocales		guanidine hydrolase pathway		Terrestrial
Gloeothece verrucosa PCC 7822	1	Chroococcales		guanidine hydrolase pathway		Terrestrial
Kaiparowitsia implicata GSE-PSE-MK54-09C	1	Pseudanabaenales		guanidine hydrolase pathway		Terrestrial
Kastovskya adunca ATA6-11-RM4	1	Oscillatoriales		guanidine hydrolase pathway		Terrestrial
Komarekiella atlantica HA4396-MV6	1	Nostocales		guanidine hydrolase pathway		Terrestrial
Leptolyngbya sp. FACHB-16	1	Pseudanabaenales		guanidine hydrolase pathway		Terrestrial
Leptolyngbya sp. FACHB-261	1	Pseudanabaenales		guanidine hydrolase pathway		Terrestrial
Leptolyngbya sp. FACHB-541	1	Pseudanabaenales		guanidine hydrolase pathway		Terrestrial
Leptolyngbya sp. FACHB-671	1	Pseudanabaenales		guanidine hydrolase pathway		Terrestrial
Leptolyngbya sp. FACHB-8	1	Pseudanabaenales		guanidine hydrolase pathway		Terrestrial
Limnothrix sp. FACHB-406	1	Pseudanabaenales		guanidine hydrolase pathway		Terrestrial
Mastigocladopsis repens PCC 10914	1	Nostocales		guanidine hydrolase pathway		Terrestrial
Microcoleus sp. FACHB-1	1	Oscillatoriales		guanidine hydrolase pathway		Terrestrial
Microcoleus sp. FACHB-1515	1	Oscillatoriales		guanidine hydrolase pathway		Terrestrial
Microcoleus sp. FACHB-53	1	Oscillatoriales		guanidine hydrolase pathway		Terrestrial
Microcoleus sp. FACHB-672	1	Oscillatoriales		guanidine hydrolase pathway		Terrestrial
Microcoleus sp. FACHB-68	1	Oscillatoriales		guanidine hydrolase pathway		Terrestrial
Microcoleus sp. FACHB-831	1	Oscillatoriales		guanidine hydrolase pathway		Terrestrial
Microcoleus sp. FACHB-SPT15	1	Oscillatoriales		guanidine hydrolase pathway		Terrestrial
Allocoleopsis franciscana PCC 7113	1	Oscillatoriales		guanidine hydrolase pathway		Terrestrial
Microcoleus vaginatus WJT46-NPBG5	1	Oscillatoriales		guanidine hydrolase pathway		Terrestrial
Nostoc calcicola FACHB-389	1	Nostocales		guanidine hydrolase pathway		Terrestrial
Nostoc calcicola FACHB-3891	1	Nostocales		guanidine hydrolase pathway		Terrestrial
Nostoc sp. B(2019)	1	Nostocales		guanidine hydrolase pathway		Terrestrial
Nostoc sp. MG11	1	Nostocales		guanidine hydrolase pathway		Terrestrial
Oculatella sp. FACHB-28	1	Pseudanabaenales		guanidine hydrolase pathway		Terrestrial
Oscillatoria acuminata PCC 6304	1	Oscillatoriales		guanidine hydrolase pathway		Terrestrial
Pegethrix bostrychoides GSE-TBD4-15B	1	Pseudanabaenales		guanidine hydrolase pathway		Terrestrial
Pelatocladus maniniholoensis HA4357-MV3	1	Nostocales		guanidine hydrolase pathway		Terrestrial
Petrachloros mirabilis ULC683	1	Synechococcales		guanidine hydrolase pathway		Terrestrial
Phormidium sp. LEGE 05292	1	Oscillatoriales		guanidine hydrolase pathway		Terrestrial
Scytonema millei VB511283	1	Nostocales		guanidine hydrolase pathway		Terrestrial
Stanieria sp. NIES-3757	1	Pleurocapsales		guanidine hydrolase pathway		Terrestrial
Symplocastrum torsivum CPER-KK1	1	Oscillatoriales		guanidine hydrolase pathway		Terrestrial
Leptolyngbya sp. Heron Island J	1	Pseudanabaenales		guanidine hydrolase pathway		Unknown
Phormidium lacuna HE10JO	1	Oscillatoriales		guanidine hydrolase pathway		Unknown
Raphidiopsis brookii D9	1	Nostocales		guanidine hydrolase pathway		Unknown
Snowella sp. ULC335bin1	1	Synechococcales		guanidine hydrolase pathway		Unknown
Spirulina major CCY15215	1	Spirulinales		guanidine hydrolase pathway		Unknown
Chroococcidiopsidales cyanobacterium LEGE 13417	1	Chroococcidiopsidales		guanidine hydrolase pathway		Unknown
Cyanosarcina radialis HA8281-LM2	1	Chroococcales		guanidine hydrolase pathway		Terrestrial
Aphanothece sacrum FPU1	0	Chroococcales
Aphanothece sacrum FPU3	0	Chroococcales
Candidatus Atelocyanobacterium sp. ALOHA A2.5 9	0	Chroococcales
Candidatus Atelocyanobacterium thalassa isolate ALOHA	0	Chroococcales
Candidatus Atelocyanobacterium thalassa isolate SIO64986	0	Chroococcales
Candidatus Atelocyanobacterium thalassa UBA4158	0	Chroococcales
Crocosphaera chwakensis CCY0110	0	Chroococcales
Crocosphaera subtropica ATCC 51142	0	Chroococcales
Crocosphaera watsonii WH 0003	0	Chroococcales
Crocosphaera watsonii WH 0005	0	Chroococcales
Crocosphaera watsonii WH 0401	0	Chroococcales
Crocosphaera watsonii WH 0402	0	Chroococcales
Crocosphaera watsonii WH 8501	0	Chroococcales
Crocosphaera watsonii WH 8502	0	Chroococcales
cyanobacterium endosymbiont of Braarudosphaera bigelowii CPSB-1	0	Chroococcales
Cyanobacterium sp. HL-69	0	Chroococcales
Cyanobacterium sp. IPPAS B-1200	0	Chroococcales
Cyanobacterium sp. T60 A2020 053	0	Chroococcales
Cyanobacterium stanieri LEGE 03274	0	Chroococcales
Geminocystis herdmanii PCC 6308	0	Chroococcales
Geminocystis sp. M7585 C2015 104	0	Chroococcales
Geminocystis sp. NIES-3708	0	Chroococcales
Geminocystis sp. NIES-3709	0	Chroococcales
Gloeocapsa sp. DLM2.Bin57	0	Chroococcales
Gloeocapsa sp. UFS-A4-WI-NPMV-4B04	0	Chroococcales
Gloeothece citriformis PCC 7424	0	Chroococcales
Gomphosphaeria aponina SAG 52.96	0	Chroococcales
Halothece sp. MAG	0	Chroococcales
Microcystis aeruginosa CACIAM 03	0	Chroococcales
Microcystis aeruginosa EAWAG127a	0	Chroococcales
Microcystis aeruginosa F13-15	0	Chroococcales
Microcystis aeruginosa FD4	0	Chroococcales
Microcystis aeruginosa LEGE 11464	0	Chroococcales
Microcystis aeruginosa LEGE 91341	0	Chroococcales
Microcystis aeruginosa LG11-05	0	Chroococcales
Microcystis aeruginosa LG13-03	0	Chroococcales
Microcystis aeruginosa LG13-12	0	Chroococcales
Microcystis aeruginosa LG13-13	0	Chroococcales
Microcystis aeruginosa Ma AC P 19900807 S299	0	Chroococcales
Microcystis aeruginosa NIES-1211	0	Chroococcales
Microcystis aeruginosa NIES-2519	0	Chroococcales
Microcystis aeruginosa NIES-2522	0	Chroococcales
Microcystis aeruginosa NIES-4264	0	Chroococcales
Microcystis aeruginosa NIES-87	0	Chroococcales
Microcystis aeruginosa PCC 9443	0	Chroococcales
Microcystis aeruginosa PCC 9701	0	Chroococcales
Microcystis aeruginosa TA09	0	Chroococcales
Microcystis aeruginosa W13-11	0	Chroococcales
Microcystis flos-aquae Ma QC C 20070823 S18	0	Chroococcales
Microcystis sp. LEGE 08355	0	Chroococcales
Microcystis sp. M049S2	0	Chroococcales
Microcystis sp. M169S2	0	Chroococcales
Microcystis sp. MC19	0	Chroococcales
Microcystis sp. T1-4	0	Chroococcales
Microcystis wesenbergii FACHB-1317	0	Chroococcales
Microcystis wesenbergii Mw MB S 20031200 S109	0	Chroococcales
Microcystis wesenbergii Mw MB S 20031200 S109D	0	Chroococcales
Rippkaea orientalis PCC 8801	0	Chroococcales
Chroococcidiopsis sp. CCNUC1	0	Chroococcidiopsidales
Gloeobacterales cyanobacterium ES-bin-141	0	Gloeobacterales
Aetokthonos hydrillicola CCALA 1050	0	Nostocales
Aetokthonos hydrillicola Thurmond2011	0	Nostocales
Anabaena aphanizomenioides LEGE 00250	0	Nostocales
Anabaena azotica FACHB-119	0	Nostocales
Anabaena catenula FACHB-362	0	Nostocales
Anabaena cylindrica FACHB-170	0	Nostocales
Anabaena cylindrica FACHB-243	0	Nostocales
Anabaena cylindrica FACHB-318	0	Nostocales
Anabaena cylindrica PCC 7122	0	Nostocales
Anabaena lutea FACHB-196	0	Nostocales
Anabaena minutissima FACHB-250	0	Nostocales
Anabaena sp. 4-3	0	Nostocales
Anabaena sp. 49628 E55	0	Nostocales
Anabaena sp. 49633 E8	0	Nostocales
Anabaena sp. 54	0	Nostocales
Anabaena sp. 90	0	Nostocales
Anabaena sp. AL09	0	Nostocales
Anabaena sp. AL93	0	Nostocales
Anabaena sp. CA	0	Nostocales
Anabaena sp. CoA2 C59	0	Nostocales
Anabaena sp. CRKS33	0	Nostocales
Anabaena sp. FACHB-1237	0	Nostocales
Anabaena sp. FACHB-1250	0	Nostocales
Anabaena sp. FACHB-709	0	Nostocales
Anabaena sp. FACHB-83	0	Nostocales
Anabaena sp. LE011-02	0	Nostocales
Anabaena sp. MDT14b	0	Nostocales
Anabaena sp. PCC 7108	0	Nostocales
Anabaena sp. UBA12330	0	Nostocales
Anabaena sp. UHCC 0187	0	Nostocales
Anabaena sp. UHCC 0204	0	Nostocales
Anabaena sp. WA102	0	Nostocales
Anabaena sp. WA113	0	Nostocales
Anabaena sp. YBS01	0	Nostocales
Anabaena sphaerica FACHB-251	0	Nostocales
Anabaena subtropica FACHB-260	0	Nostocales
Anabaena variabilis FACHB-164	0	Nostocales
Anabaena variabilis FACHB-171	0	Nostocales
Anabaenopsis circularis NIES-21	0	Nostocales
Anabaenopsis elenkinii CCIBt3563	0	Nostocales
Aphanizomenon flos-aquae 2012 KM1 D3	0	Nostocales
Aphanizomenon flos-aquae CCAP 1446	0	Nostocales
Aphanizomenon flos-aquae Clear-A1	0	Nostocales
Aphanizomenon flos-aquae CP01	0	Nostocales
Aphanizomenon flos-aquae DEX188	0	Nostocales
Aphanizomenon flos-aquae FACHB-1040	0	Nostocales
Aphanizomenon flos-aquae FACHB-1171	0	Nostocales
Aphanizomenon flos-aquae FACHB-1249	0	Nostocales
Aphanizomenon flos-aquae FACHB-1265	0	Nostocales
Aphanizomenon flos-aquae FACHB-1287	0	Nostocales
Aphanizomenon flos-aquae FACHB-1290	0	Nostocales
Aphanizomenon flos-aquae FACHB-1416	0	Nostocales
Aphanizomenon flos-aquae KM1D3 PB	0	Nostocales
Aphanizomenon flos-aquae LD13	0	Nostocales
Aphanizomenon flos-aquae MDT14a	0	Nostocales
Aphanizomenon flos-aquae UKL13-PB	0	Nostocales
Aphanizomenon flos-aquae WA102	0	Nostocales
Aphanizomenon sp. FACHB-1399	0	Nostocales
Aphanizomenon sp. FACHB-1401	0	Nostocales
Aphanizomenon sp. UHCC 0183	0	Nostocales
Atlanticothrix silvestris CENA357	0	Nostocales
Aulosira laxa NIES-50	0	Nostocales
Aulosira sp. FACHB-113	0	Nostocales
Aulosira sp. FACHB-615	0	Nostocales
Brasilonema angustatum HA4187-MV1	0	Nostocales
Brasilonema bromeliae SPC951	0	Nostocales
Brasilonema octagenarum HA4186-MV1	0	Nostocales
Brasilonema octagenarum UFV-E1	0	Nostocales
Brasilonema octagenarum UFV-OR1	0	Nostocales
Brasilonema sennae CENA114	0	Nostocales
Brasilonema sp. CT11	0	Nostocales
Brasilonema sp. UFV-L1	0	Nostocales
Calothrix anomala FACHB-343	0	Nostocales
Calothrix brevissima NIES-22	0	Nostocales
Calothrix desertica PCC 7102	0	Nostocales
Calothrix elsteri CCALA 953	0	Nostocales
Calothrix membranacea FACHB-236	0	Nostocales
Calothrix parasitica NIES-267	0	Nostocales
Calothrix parietina FACHB-288	0	Nostocales
Calothrix rhizosoleniae SC01	0	Nostocales
Calothrix sp. 336 3	0	Nostocales
Calothrix sp. C42 A2020 038	0	Nostocales
Calothrix sp. CSU 2 0	0	Nostocales
Calothrix sp. FACHB-1219	0	Nostocales
Calothrix sp. FACHB-156	0	Nostocales
Calothrix sp. FACHB-168	0	Nostocales
Calothrix sp. FI2-JRJ7	0	Nostocales
Calothrix sp. HK-06	0	Nostocales
Calothrix sp. NIES-2098	0	Nostocales
Calothrix sp. NIES-2100	0	Nostocales
Calothrix sp. NIES-3974	0	Nostocales
Calothrix sp. NIES-4071	0	Nostocales
Calothrix sp. NIES-4105	0	Nostocales
Calothrix sp. PCC 6303	0	Nostocales
Calothrix sp. PCC 7103	0	Nostocales
Calothrix sp. PCC 7507	0	Nostocales
Calothrix sp. PCC 7716	0	Nostocales
Calothrix sp. SM1 5 4	0	Nostocales
Calothrix sp. SM1 7 51	0	Nostocales
Chrysosporum ovalisporum UAM-MAO	0	Nostocales
Cuspidothrix issatschenkoi CHARLIE-1	0	Nostocales
Cuspidothrix issatschenkoi LEGE 03284	0	Nostocales
Cyanocohniella sp. LLY	0	Nostocales
Cyanomargarita calcarea GSE-NOS-MK-12-04C	0	Nostocales
Cylindrospermopsis curvispora GIHE-G1	0	Nostocales
Cylindrospermopsis raciborskii Cr2010	0	Nostocales
Cylindrospermopsis raciborskii KLL07	0	Nostocales
Cylindrospermopsis raciborskii MYJ.16	0	Nostocales
Cylindrospermum sp. FACHB-282	0	Nostocales
Cylindrospermum sp. NIES-4074	0	Nostocales
Cylindrospermum stagnale PCC 7417	0	Nostocales
Dendronalium phyllosphericum CENA369	0	Nostocales
Desmonostoc muscorum CCALA 125	0	Nostocales
Desmonostoc muscorum FACHB-395	0	Nostocales
Desmonostoc muscorum LEGE 12446	0	Nostocales
Desmonostoc vinosum HA7617-LM4	0	Nostocales
Dolichospermum circinale AWQC131C	0	Nostocales
Dolichospermum circinale AWQC310F	0	Nostocales
Dolichospermum circinale Clear-D4	0	Nostocales
Dolichospermum compactum NIES-806	0	Nostocales
Dolichospermum flos-aquae CCAP 1403	0	Nostocales
Dolichospermum flos-aquae LEGE 04289	0	Nostocales
Dolichospermum flos-aquae UHCC 0037	0	Nostocales
Dolichospermum planctonicum	0	Nostocales
Dolichospermum planctonicum UHCC 0167	0	Nostocales
Dolichospermum sp.	0	Nostocales
Dolichospermum sp. BR01	0	Nostocales
Dolichospermum sp. DET50	0	Nostocales
Dolichospermum sp. DET66	0	Nostocales
Dolichospermum sp. DET67	0	Nostocales
Dolichospermum sp. DET69	0	Nostocales
Dolichospermum sp. DET73	0	Nostocales
Dolichospermum sp. DEX182a	0	Nostocales
Dolichospermum sp. DEX189	0	Nostocales
Dolichospermum sp. DL01	0	Nostocales
Dolichospermum sp. FACHB-1091	0	Nostocales
Dolichospermum sp. JUN01	0	Nostocales
Dolichospermum sp. LBC05a	0	Nostocales
Dolichospermum sp. LEGE 00240	0	Nostocales
Dolichospermum sp. LEGE 00246	0	Nostocales
Dolichospermum sp. OL01	0	Nostocales
Dolichospermum sp. UHCC 0259	0	Nostocales
Dolichospermum sp. UHCC 0260	0	Nostocales
Dolichospermum sp. UHCC 0299	0	Nostocales
Dolichospermum sp. UHCC 0315A	0	Nostocales
Dolichospermum sp. UHCC 0352	0	Nostocales
Dolichospermum sp. UHCC 0406	0	Nostocales
Dolichospermum sp. UKL201	0	Nostocales
Dolichospermum sp. WA123	0	Nostocales
Fischerella sp. PCC 9339	0	Nostocales
Fischerella sp. PCC 9431	0	Nostocales
Fischerella thermalis CCMEE 5319	0	Nostocales
Fischerella thermalis CCMEE 5328	0	Nostocales
Fischerella thermalis WC1110	0	Nostocales
Fischerella thermalis WC344	0	Nostocales
Fischerella thermalis WC441	0	Nostocales
Fischerella thermalis WC527	0	Nostocales
Fischerella thermalis WC538	0	Nostocales
Fortiea contorta PCC 7126	0	Nostocales
Fortiea sp. LEGE XX443	0	Nostocales
Fremyella diplosiphon NIES-3275	0	Nostocales
Goleter apudmare HA4340-LM2	0	Nostocales
Hapalosiphon sp. MRB220	0	Nostocales
Hapalosiphonaceae cyanobacterium JJU2	0	Nostocales
Hassallia byssoidea VB512170	0	Nostocales
Hassallia sp. WJT32-NPBG1	0	Nostocales
Iningainema tapete BLCC-T55	0	Nostocales
Iphinoe sp. HA4291-MV1	0	Nostocales
Mastigocladus laminosus UU774	0	Nostocales
Mastigocoleus testarum BC008	0	Nostocales
Mojavia pulchra JT2-VF2	0	Nostocales
Nodularia sp. LEGE 04288	0	Nostocales
Nodularia sp. LEGE 06071	0	Nostocales
Nodularia sp. NIES-3585	0	Nostocales
Nodularia sphaerocarpa UHCC 0038	0	Nostocales
Nodularia spumigena CCY9414	0	Nostocales
Nodularia spumigena CENA596	0	Nostocales
Nodularia spumigena UHCC 0039	0	Nostocales
Nostoc azollae 0708	0	Nostocales
Nostoc carneum NIES-2107	0	Nostocales
Nostoc cf. edaphicum LEGE 07299	0	Nostocales
Nostoc commune BAE	0	Nostocales
Nostoc commune HK-02	0	Nostocales
Nostoc commune NIES-4072	0	Nostocales
Nostoc cycadae WK-1	0	Nostocales
Nostoc desertorum CM1-VF14	0	Nostocales
Nostoc favosum CHAB5714	0	Nostocales
Nostoc foliaceum FACHB-393	0	Nostocales
Nostoc linckia FACHB-104	0	Nostocales
Nostoc linckia FACHB-391	0	Nostocales
Nostoc linckia NIES-25	0	Nostocales
Nostoc linckia z1	0	Nostocales
Nostoc linckia z13	0	Nostocales
Nostoc linckia z14	0	Nostocales
Nostoc linckia z15	0	Nostocales
Nostoc linckia z16	0	Nostocales
Nostoc linckia z18	0	Nostocales
Nostoc linckia z2	0	Nostocales
Nostoc linckia z3	0	Nostocales
Nostoc linckia z4	0	Nostocales
Nostoc linckia z6	0	Nostocales
Nostoc linckia z7	0	Nostocales
Nostoc linckia z8	0	Nostocales
Nostoc linckia z9	0	Nostocales
Nostoc minutum NIES-26	0	Nostocales
Nostoc mirabile CHAB5784	0	Nostocales
Nostoc paludosum FACHB-159	0	Nostocales
Nostoc parmelioides FACHB-3921	0	Nostocales
Nostoc piscinale CENA21	0	Nostocales
Nostoc punctiforme FACHB-252	0	Nostocales
Nostoc punctiforme NIES-2108	0	Nostocales
Nostoc punctiforme PCC 73102	0	Nostocales
Nostoc sp. 106C	0	Nostocales
Nostoc sp. 2RC	0	Nostocales
Nostoc sp. ATCC 43529	0	Nostocales
Nostoc sp. ATCC 53789	0	Nostocales
Nostoc sp. C057	0	Nostocales
Nostoc sp. CENA543	0	Nostocales
Nostoc sp. CHAB 5715	0	Nostocales
Nostoc sp. CHAB 5824	0	Nostocales
Nostoc sp. CHAB 5834	0	Nostocales
Nostoc sp. CHAB 5836	0	Nostocales
Nostoc sp. CHAB 5844	0	Nostocales
Nostoc sp. CMAA1605	0	Nostocales
Nostoc sp. FACHB-110	0	Nostocales
Nostoc sp. FACHB-133	0	Nostocales
Nostoc sp. FACHB-145	0	Nostocales
Nostoc sp. FACHB-152	0	Nostocales
Nostoc sp. FACHB-190	0	Nostocales
Nostoc sp. FACHB-280	0	Nostocales
Nostoc sp. FACHB-857	0	Nostocales
Nostoc sp. FACHB-87	0	Nostocales
Nostoc sp. FACHB-892	0	Nostocales
Nostoc sp. FACHB-973	0	Nostocales
Nostoc sp. GBBB01	0	Nostocales
Nostoc sp. HG1	0	Nostocales
Nostoc sp. HK-01	0	Nostocales
Nostoc sp. JL23	0	Nostocales
Nostoc sp. JL31	0	Nostocales
Nostoc sp. JL33	0	Nostocales
Nostoc sp. JL34	0	Nostocales
Nostoc sp. KVJ20	0	Nostocales
Nostoc sp. LEGE 06077	0	Nostocales
Nostoc sp. LEGE 12447	0	Nostocales
Nostoc sp. LEGE 12450	0	Nostocales
Nostoc sp. Lobaria pulmonaria 5183 cyanobiont	0	Nostocales
Nostoc sp. LPT	0	Nostocales
Nostoc sp. MBR 210	0	Nostocales
Nostoc sp. MS1	0	Nostocales
Nostoc sp. NIES-2111	0	Nostocales
Nostoc sp. NIES-3756	0	Nostocales
Nostoc sp. NIES-4103	0	Nostocales
Nostoc sp. NMS1	0	Nostocales
Nostoc sp. NMS2	0	Nostocales
Nostoc sp. NMS4	0	Nostocales
Nostoc sp. NMS7	0	Nostocales
Nostoc sp. NMS8	0	Nostocales
Nostoc sp. NMS9	0	Nostocales
Nostoc sp. NOS 2021	0	Nostocales
Nostoc sp. NZL	0	Nostocales
Nostoc sp. PA-18-2419	0	Nostocales
Nostoc sp. PCC 7107	0	Nostocales
Nostoc sp. PCC 7120	0	Nostocales
Nostoc sp. PCC 7524	0	Nostocales
Nostoc sp. Peltigera malacea cyanobiont DB3992	0	Nostocales
Nostoc sp. Peltigera membranacea cyanobiont 210A	0	Nostocales
Nostoc sp. Peltigera membranacea cyanobiont 213	0	Nostocales
Nostoc sp. Peltigera membranacea cyanobiont 232	0	Nostocales
Nostoc sp. Peltigera membranacea cyanobiont N6	0	Nostocales
Nostoc sp. RF31YmG	0	Nostocales
Nostoc sp. RI 552	0	Nostocales
Nostoc sp. T09	0	Nostocales
Nostoc sp. TCL240-02	0	Nostocales
Nostoc sp. TCL26-01	0	Nostocales
Nostoc sp. TH1S01	0	Nostocales
Nostoc sp. UBA8866	0	Nostocales
Nostoc sp. UCD120	0	Nostocales
Nostoc sp. UCD121	0	Nostocales
Nostoc sp. UCD122	0	Nostocales
Nostoc sp. UHCC 0702	0	Nostocales
Nostoc sp. UHCC 0870	0	Nostocales
Nostoc sp. UIC 10630	0	Nostocales
Nostoc sphaeroides CCNUC1	0	Nostocales
Nostoc spongiaeforme FACHB-130	0	Nostocales
Nostocaceae cyanobacterium CSSed10 463m	0	Nostocales
Nostocaceae cyanobacterium CSU 2 110	0	Nostocales
Nostocales cyanobacterium HT-58-2	0	Nostocales
Nostocales cyanobacterium LEGE 11386	0	Nostocales
Nostocales cyanobacterium LEGE 12452	0	Nostocales
Nostocales cyanobacterium W4 Combined metabat2 030	0	Nostocales
Raphidiopsis curvata NIES-932	0	Nostocales
Richelia intracellularis HH01	0	Nostocales
Richelia intracellularis HM01	0	Nostocales
Richelia intracellularis UBA3481	0	Nostocales
Richelia intracellularis UBA7409	0	Nostocales
Richelia sinica FACHB-800	0	Nostocales
Richelia sp. RM1 1 1	0	Nostocales
Richelia sp. RM2 1 2	0	Nostocales
Richelia sp. SL 2 1	0	Nostocales
Richelia sp. SM1 7 0	0	Nostocales
Richelia sp. SM2 1 7	0	Nostocales
Richelia sp. UBA3308	0	Nostocales
Richelia sp. UBA3957	0	Nostocales
Richelia sp. UBA3958	0	Nostocales
Rivularia sp. ALOHA DT 140	0	Nostocales
Rivularia sp. IAM M-261	0	Nostocales
Rivularia sp. PCC 7116	0	Nostocales
Rivularia sp. T60 A2020 040	0	Nostocales
Scytonema hofmanni UTEX 2349	0	Nostocales
Scytonema hofmannii FACHB-248	0	Nostocales
Scytonema hofmannii PCC 7110	0	Nostocales
Scytonema hyalinum WJT4-NPBG1	0	Nostocales
Scytonema sp. CRU 2 7	0	Nostocales
Scytonema sp. HK-05	0	Nostocales
Scytonema sp. NIES-4073	0	Nostocales
Scytonema sp. RU 4 4	0	Nostocales
Scytonema tolypothrichoides VB-61278	0	Nostocales
Scytonematopsis contorta HA4267-MV1	0	Nostocales
Sphaerospermopsis aphanizomenoides BCCUSP55	0	Nostocales
Sphaerospermopsis kisseleviana NIES-73	0	Nostocales
Sphaerospermopsis reniformis NIES-1949	0	Nostocales
Sphaerospermopsis sp. FACHB-1094	0	Nostocales
Sphaerospermopsis sp. FACHB-1194	0	Nostocales
Sphaerospermopsis sp. LEGE 00249	0	Nostocales
Sphaerospermopsis sp. LEGE 08334	0	Nostocales
Sphaerospermopsis sp. SIO1G1	0	Nostocales
Sphaerospermopsis sp. SIO1G2	0	Nostocales
Sphaerospermopsis torques-reginae ITEP-024	0	Nostocales
Spirirestis rafaelensis WJT71-NPBG6	0	Nostocales
Stigonema ocellatum SAG 48.90	0	Nostocales
Tolypothrix bouteillei VB521301	0	Nostocales
Tolypothrix brevis GSE-NOS-MK-07-07A	0	Nostocales
Tolypothrix campylonemoides VB511288	0	Nostocales
Tolypothrix carrinoi HA7290-LM1	0	Nostocales
Tolypothrix sp. Co-bin9	0	Nostocales
Tolypothrix sp. FACHB-123	0	Nostocales
Tolypothrix sp. LEGE 11397	0	Nostocales
Tolypothrix sp. NIES-4075	0	Nostocales
Tolypothrix sp. PCC 7601	0	Nostocales
Tolypothrix sp. PCC 7910	0	Nostocales
Tolypothrix tenuis PCC 7101	0	Nostocales
Trichormus sp. ATA11-4-KO1	0	Nostocales
Trichormus sp. M33 DOE 039	0	Nostocales
Trichormus sp. NMC-1	0	Nostocales
Trichormus variabilis 0441	0	Nostocales
Trichormus variabilis 9RC	0	Nostocales
Trichormus variabilis A2	0	Nostocales
Trichormus variabilis ARAD	0	Nostocales
Trichormus variabilis ATCC 29413	0	Nostocales
Trichormus variabilis FACHB-319	0	Nostocales
Trichormus variabilis FSR	0	Nostocales
Trichormus variabilis N2B	0	Nostocales
Trichormus variabilis NIES-23	0	Nostocales
Trichormus variabilis PNB	0	Nostocales
Trichormus variabilis SAG 1403-4b	0	Nostocales
Trichormus variabilis V5	0	Nostocales
Westiellopsis prolifica IICB1	0	Nostocales
Argonema galeatum A003	0	Oscillatoriales
Arthrospira platensis C1	0	Oscillatoriales
Arthrospira platensis FACHB-439	0	Oscillatoriales
Arthrospira platensis FACHB-835	0	Oscillatoriales
Arthrospira platensis FACHB-971	0	Oscillatoriales
Arthrospira platensis NIES-39	0	Oscillatoriales
Arthrospira platensis NIES-46	0	Oscillatoriales
Arthrospira platensis str. Paraca	0	Oscillatoriales
Arthrospira platensis YZ	0	Oscillatoriales
Arthrospira sp. O9.13F	0	Oscillatoriales
Arthrospira sp. PCC 9108	0	Oscillatoriales
Arthrospira sp. PLM2.Bin9	0	Oscillatoriales
Arthrospira sp. SH-MAG29	0	Oscillatoriales
Caldora sp. SIO3E6	0	Oscillatoriales
Coleofasciculaceae cyanobacterium SM2 1 6	0	Oscillatoriales
Coleofasciculaceae cyanobacterium SM2 3 26	0	Oscillatoriales
Coleofasciculus sp. C3-bin4	0	Oscillatoriales
Coleofasciculus sp. Co-bin14	0	Oscillatoriales
Crinalium epipsammum PCC 9333	0	Oscillatoriales
Cyanothece sp. BG0011	0	Oscillatoriales
Cyanothece sp. SIO2G6	0	Oscillatoriales
Cyanothece sp. UBA12306	0	Oscillatoriales
Geitlerinema sp. P-1104	0	Oscillatoriales
Geitlerinema sp. PCC 9228	0	Oscillatoriales
Geitlerinema sp. S16	0	Oscillatoriales
Hormoscilla sp. GM102CHS1	0	Oscillatoriales
Hormoscilla sp. GM7CHS1pb	0	Oscillatoriales
Hormoscilla sp. GUM202	0	Oscillatoriales
Hormoscilla sp. SP12CHS1	0	Oscillatoriales
Hormoscilla sp. SP5CHS1	0	Oscillatoriales
Hydrocoleum sp. CS-953	0	Oscillatoriales
Kamptonema sp. SIO4C4	0	Oscillatoriales
Limnoraphis robusta CS-951	0	Oscillatoriales
Limnoraphis sp. WC205	0	Oscillatoriales
Limnospira fusiformis KN01	0	Oscillatoriales
Limnospira fusiformis SAG 85.79	0	Oscillatoriales
Limnospira indica BM01	0	Oscillatoriales
Limnospira maxima CS-328	0	Oscillatoriales
Lyngbya aestuarii BL J	0	Oscillatoriales
Lyngbya sp. PCC 8106	0	Oscillatoriales
Microcoleaceae bacterium UBA10368	0	Oscillatoriales
Microcoleaceae bacterium UBA11344	0	Oscillatoriales
Microcoleaceae bacterium UBA9251	0	Oscillatoriales
Microcoleaceae cyanobacterium S07	0	Oscillatoriales
Microcoleus sp. bin38.metabat.b11b12b14.051	0	Oscillatoriales
Microcoleus sp. bin48.metabat.b7b8b9.023	0	Oscillatoriales
Microcoleus sp. CAWBG24	0	Oscillatoriales
Microcoleus sp. CAWBG27	0	Oscillatoriales
Microcoleus sp. CAWBG50	0	Oscillatoriales
Microcoleus sp. CAWBG506	0	Oscillatoriales
Microcoleus sp. CAWBG51	0	Oscillatoriales
Microcoleus sp. CAWBG52	0	Oscillatoriales
Microcoleus sp. CAWBG556	0	Oscillatoriales
Microcoleus sp. CAWBG58	0	Oscillatoriales
Microcoleus sp. CAWBG639	0	Oscillatoriales
Microcoleus sp. CAWBG640	0	Oscillatoriales
Microcoleus sp. CSU 2 2	0	Oscillatoriales
Microcoleus sp. GA 180221 E-1-1-MAG-43 4	0	Oscillatoriales
Microcoleus sp. LEGE 07076	0	Oscillatoriales
Microcoleus sp. PH2017 01 SCD O A	0	Oscillatoriales
Microcoleus sp. PH2017 02 FOX O A	0	Oscillatoriales
Microcoleus sp. PH2017 03 ELD O A	0	Oscillatoriales
Microcoleus sp. PH2017 04 SCI O A	0	Oscillatoriales
Microcoleus sp. PH2017 05 CCC O A	0	Oscillatoriales
Microcoleus sp. PH2017 06 SFM O A	0	Oscillatoriales
Microcoleus sp. PH2017 07 MST O A	0	Oscillatoriales
Microcoleus sp. PH2017 08 TRC O A	0	Oscillatoriales
Microcoleus sp. PH2017 09 SFU O A	0	Oscillatoriales
Microcoleus sp. PH2017 10 PVI O A	0	Oscillatoriales
Microcoleus sp. PH2017 11 PCY U A	0	Oscillatoriales
Microcoleus sp. PH2017 12 PCY D A	0	Oscillatoriales
Microcoleus sp. PH2017 13 LAR U A	0	Oscillatoriales
Microcoleus sp. PH2017 14 LAR D A	0	Oscillatoriales
Microcoleus sp. PH2017 15 JOR U A	0	Oscillatoriales
Microcoleus sp. PH2017 16 JOR D A	0	Oscillatoriales
Microcoleus sp. PH2017 17 BER D A	0	Oscillatoriales
Microcoleus sp. PH2017 18 LLB O A	0	Oscillatoriales
Microcoleus sp. PH2017 19 SFW U A	0	Oscillatoriales
Microcoleus sp. PH2017 20 SFW D A	0	Oscillatoriales
Microcoleus sp. PH2017 21 RUC O A	0	Oscillatoriales
Microcoleus sp. PH2017 22 RUC O B	0	Oscillatoriales
Microcoleus sp. PH2017 24 DOB U A	0	Oscillatoriales
Microcoleus sp. PH2017 25 DOB D A	0	Oscillatoriales
Microcoleus sp. PH2017 26 ELK O A	0	Oscillatoriales
Microcoleus sp. PH2017 27 LUM O A	0	Oscillatoriales
Microcoleus sp. PH2017 28 MFU U A	0	Oscillatoriales
Microcoleus sp. PH2017 29 MFU D A	0	Oscillatoriales
Microcoleus sp. PH2017 30 WIL O A	0	Oscillatoriales
Microcoleus sp. PH2017 31 RDM U A	0	Oscillatoriales
Microcoleus sp. PH2017 32 RDM D A	0	Oscillatoriales
Microcoleus sp. PH2017 33 LGB O A	0	Oscillatoriales
Microcoleus sp. PH2017 34 RAT O A	0	Oscillatoriales
Microcoleus sp. PH2017 35 SFW U B	0	Oscillatoriales
Microcoleus sp. PH2017 36 ELK O B	0	Oscillatoriales
Microcoleus sp. PH2017 37 MFU D B	0	Oscillatoriales
Microcoleus sp. PH2017 38 RDM U B	0	Oscillatoriales
Microcoleus sp. PH2017 39 LGB O B	0	Oscillatoriales
Microcoleus sp. PH2017 40 RAT O B	0	Oscillatoriales
Microcoleus sp. SU 5 3	0	Oscillatoriales
Microcoleus sp. T3-bin5	0	Oscillatoriales
Moorena bouillonii PNG	0	Oscillatoriales
Moorena producens 3L	0	Oscillatoriales
Moorena producens JHB	0	Oscillatoriales
Moorena producens PAL-8-15-08-1	0	Oscillatoriales
Moorena sp. SIO1F2	0	Oscillatoriales
Moorena sp. SIO1G6	0	Oscillatoriales
Moorena sp. SIO2B7	0	Oscillatoriales
Moorena sp. SIO2C4	0	Oscillatoriales
Moorena sp. SIO2I5	0	Oscillatoriales
Moorena sp. SIO3A2	0	Oscillatoriales
Moorena sp. SIO3A5	0	Oscillatoriales
Moorena sp. SIO3B2	0	Oscillatoriales
Moorena sp. SIO3C2	0	Oscillatoriales
Moorena sp. SIO3E2	0	Oscillatoriales
Moorena sp. SIO3E8	0	Oscillatoriales
Moorena sp. SIO3F7	0	Oscillatoriales
Moorena sp. SIO3G5	0	Oscillatoriales
Moorena sp. SIO3H5	0	Oscillatoriales
Moorena sp. SIO3I6	0	Oscillatoriales
Moorena sp. SIO3I7	0	Oscillatoriales
Moorena sp. SIO3I8	0	Oscillatoriales
Moorena sp. SIO4A1	0	Oscillatoriales
Moorena sp. SIO4A3	0	Oscillatoriales
Moorena sp. SIO4A5	0	Oscillatoriales
Moorena sp. SIO4E2	0	Oscillatoriales
Moorena sp. SIO4G2	0	Oscillatoriales
Moorena sp. SIO4G3	0	Oscillatoriales
Moorena sp. SIOASIH	0	Oscillatoriales
Moorena sp. SS36440bin 2	0	Oscillatoriales
Okeania sp. KiyG1	0	Oscillatoriales
Okeania sp. SIO1F9	0	Oscillatoriales
Okeania sp. SIO1H2	0	Oscillatoriales
Okeania sp. SIO1H4	0	Oscillatoriales
Okeania sp. SIO1H5	0	Oscillatoriales
Okeania sp. SIO1H6	0	Oscillatoriales
Okeania sp. SIO1I7	0	Oscillatoriales
Okeania sp. SIO2B3	0	Oscillatoriales
Okeania sp. SIO2B9	0	Oscillatoriales
Okeania sp. SIO2C2	0	Oscillatoriales
Okeania sp. SIO2C9	0	Oscillatoriales
Okeania sp. SIO2D1	0	Oscillatoriales
Okeania sp. SIO2F4	0	Oscillatoriales
Okeania sp. SIO2F5	0	Oscillatoriales
Okeania sp. SIO2G4	0	Oscillatoriales
Okeania sp. SIO2G5	0	Oscillatoriales
Okeania sp. SIO2H7	0	Oscillatoriales
Okeania sp. SIO3B3	0	Oscillatoriales
Okeania sp. SIO3B5	0	Oscillatoriales
Okeania sp. SIO3C4	0	Oscillatoriales
Okeania sp. SIO3H1	0	Oscillatoriales
Okeania sp. SIO3I5	0	Oscillatoriales
Okeania sp. SIO4D6	0	Oscillatoriales
Oscillatoria sp. FACHB-1406	0	Oscillatoriales
Oscillatoria sp. PCC 10802	0	Oscillatoriales
Oscillatoria sp. SIO1A7	0	Oscillatoriales
Oscillatoriaceae cyanobacterium M33 DOE 052	0	Oscillatoriales
Oscillatoriaceae cyanobacterium M7585 C2015 266	0	Oscillatoriales
Oscillatoriales bacterium UBA8482	0	Oscillatoriales
Oscillatoriales cyanobacterium CG2 30 40 61	0	Oscillatoriales
Oscillatoriales cyanobacterium CG2 30 44 21	0	Oscillatoriales
Oscillatoriales cyanobacterium M4454 W2019 049	0	Oscillatoriales
Oscillatoriales cyanobacterium M59 W2019 021	0	Oscillatoriales
Oscillatoriales cyanobacterium RM1 1 9	0	Oscillatoriales
Oscillatoriales cyanobacterium RM2 1 1	0	Oscillatoriales
Oscillatoriales cyanobacterium SM2 1 8	0	Oscillatoriales
Oscillatoriales cyanobacterium SM2 2 1	0	Oscillatoriales
Oscillatoriales cyanobacterium SM2 3 0	0	Oscillatoriales
Oscillatoriales cyanobacterium USR001	0	Oscillatoriales
Phormidium pseudopriestleyi FRX01	0	Oscillatoriales
Phormidium sp. ETS-05	0	Oscillatoriales
Phormidium sp. FACHB-1136	0	Oscillatoriales
Phormidium sp. GEM2.Bin31	0	Oscillatoriales
Phormidium sp. OSCR	0	Oscillatoriales
Phormidium sp. PBR-2020	0	Oscillatoriales
Phormidium sp. SL48-SHIP	0	Oscillatoriales
Phormidium willei BDU 130791	0	Oscillatoriales
Planktothricoides sp. FACHB-1261	0	Oscillatoriales
Planktothricoides sp. FACHB-1370	0	Oscillatoriales
Planktothricoides sp. SR001	0	Oscillatoriales
Planktothrix mougeotii LEGE 06226	0	Oscillatoriales
Planktothrix paucivesiculata PCC 9631	0	Oscillatoriales
Planktothrix serta PCC 8927	0	Oscillatoriales
Planktothrix sp. bin 235 243	0	Oscillatoriales
Planktothrix sp. FACHB-1365	0	Oscillatoriales
Planktothrix sp. PCC 11201	0	Oscillatoriales
Planktothrix sp. UBA10369	0	Oscillatoriales
Planktothrix sp. UBA8402	0	Oscillatoriales
Planktothrix sp. UBA8407	0	Oscillatoriales
Planktothrix tepida PCC 9214	0	Oscillatoriales
Plectonema cf. radiosum LEGE 06105	0	Oscillatoriales
Sodalinema gerasimenkoae IPPAS B-353	0	Oscillatoriales
Symploca sp. SIO1A3	0	Oscillatoriales
Symploca sp. SIO1B1	0	Oscillatoriales
Symploca sp. SIO1C2	0	Oscillatoriales
Symploca sp. SIO1C4	0	Oscillatoriales
Symploca sp. SIO2B6	0	Oscillatoriales
Symploca sp. SIO2D2	0	Oscillatoriales
Symploca sp. SIO2E6	0	Oscillatoriales
Symploca sp. SIO2E9	0	Oscillatoriales
Symploca sp. SIO2G7	0	Oscillatoriales
Symploca sp. SIO3C6	0	Oscillatoriales
Trichodesmium erythraeum	0	Oscillatoriales
Trichodesmium erythraeum 21-75	0	Oscillatoriales
Trichodesmium erythraeum GBRTRLIN201	0	Oscillatoriales
Trichodesmium sp. ALOHA ZT 67	0	Oscillatoriales
Trichodesmium sp. jk18x7bins.61	0	Oscillatoriales
Trichodesmium sp. MAG R01	0	Oscillatoriales
Trichodesmium sp. MAG R02	0	Oscillatoriales
Trichodesmium sp. MAG R03	0	Oscillatoriales
Trichodesmium sp. MAG R04	0	Oscillatoriales
Trichodesmium thiebautii H9-4	0	Oscillatoriales
Tychonema bourrellyi FEM GT703	0	Oscillatoriales
Tychonema sp. BBK16	0	Oscillatoriales
Tychonema sp. LEGE 06208	0	Oscillatoriales
Tychonema sp. LEGE 07196	0	Oscillatoriales
Tychonema sp. LEGE 07199	0	Oscillatoriales
Tychonema sp. LEGE 07203	0	Oscillatoriales
Hydrococcus rivularis NIES-593	0	Pleurocapsales
Myxosarcina sp. GI1	0	Pleurocapsales
Pleurocapsa minor GSE-CHR-MK 17-07R	0	Pleurocapsales
Pleurocapsa minor HA4230-MV1	0	Pleurocapsales
Pleurocapsa sp. SU 196 0	0	Pleurocapsales
Stanieria cyanosphaera PCC 7437	0	Pleurocapsales
Alkalinema sp. RL 2 19	0	Pseudanabaenales
Alkalinema sp. RU 4 3	0	Pseudanabaenales
Drouetiella hepatica Uher 2000	0	Pseudanabaenales
Leptodesmis sichuanensis PKUAC-SCTA121	0	Pseudanabaenales
Leptolyngbya foveolarum ULC129bin1	0	Pseudanabaenales
Leptolyngbya sp. CCY15150	0	Pseudanabaenales
Leptolyngbya sp. DLM2.Bin15	0	Pseudanabaenales
Leptolyngbya sp. O-77	0	Pseudanabaenales
Leptolyngbya sp. PCC 7376	0	Pseudanabaenales
Leptolyngbya sp. PLA1	0	Pseudanabaenales
Leptolyngbya sp. PL-A2	0	Pseudanabaenales
Leptolyngbya sp. PL-A3	0	Pseudanabaenales
Leptolyngbya sp. RL 3 1	0	Pseudanabaenales
Leptolyngbya sp. SIO4C5	0	Pseudanabaenales
Leptolyngbya valderiana BDU 20041	0	Pseudanabaenales
Leptolyngbyaceae cyanobacterium CRU 2 3	0	Pseudanabaenales
Leptolyngbyaceae cyanobacterium CSSed162cmA 214	0	Pseudanabaenales
Leptolyngbyaceae cyanobacterium CSSed162cmB 428R1	0	Pseudanabaenales
Leptolyngbyaceae cyanobacterium CSU 1 4	0	Pseudanabaenales
Leptolyngbyaceae cyanobacterium RM1 1 2	0	Pseudanabaenales
Leptolyngbyaceae cyanobacterium RM1 405 57	0	Pseudanabaenales
Leptolyngbyaceae cyanobacterium RM2 2 21	0	Pseudanabaenales
Leptolyngbyaceae cyanobacterium SL 1 1	0	Pseudanabaenales
Leptolyngbyaceae cyanobacterium SM1 1 3	0	Pseudanabaenales
Limnothrix rosea IAM M-220	0	Pseudanabaenales
Limnothrix sp. RL 2 0	0	Pseudanabaenales
Nodosilinea sp. BSH.14	0	Pseudanabaenales
Phormidesmis priestleyi Ana	0	Pseudanabaenales
Prochlorothrix hollandica PCC 9006	0	Pseudanabaenales
Pseudanabaena sp. ABRG5-3	0	Pseudanabaenales
Pseudanabaena sp. BC1403	0	Pseudanabaenales
Pseudanabaena sp. bin 143	0	Pseudanabaenales
Pseudanabaena sp. CoA8 M7	0	Pseudanabaenales
Pseudanabaena sp. FACHB-1050	0	Pseudanabaenales
Pseudanabaena sp. FACHB-1277	0	Pseudanabaenales
Pseudanabaena sp. FACHB-1998	0	Pseudanabaenales
Pseudanabaena sp. FACHB-723	0	Pseudanabaenales
Pseudanabaena sp. GA 180221 E-2-1-MAG-43 5	0	Pseudanabaenales
Pseudanabaena sp. lw0831	0	Pseudanabaenales
Pseudanabaena sp. M007S1SP1A06QC	0	Pseudanabaenales
Pseudanabaena sp. M046S1SP1A06QC	0	Pseudanabaenales
Pseudanabaena sp. M051S1SP1A06QC	0	Pseudanabaenales
Pseudanabaena sp. M090S1SP1A06QC	0	Pseudanabaenales
Pseudanabaena sp. M109S1SP1A06QC	0	Pseudanabaenales
Pseudanabaena sp. M109S1SP2A07QC	0	Pseudanabaenales
Pseudanabaena sp. M110S1SP2A07QC	0	Pseudanabaenales
Pseudanabaena sp. M158S2SP1A06QC	0	Pseudanabaenales
Pseudanabaena sp. M34BS1SP1A06MG	0	Pseudanabaenales
Pseudanabaena sp. M38BS1SP1A06MG	0	Pseudanabaenales
Pseudanabaena sp. M53BS1SP1A06MG	0	Pseudanabaenales
Pseudanabaena sp. M57BS1SP1A06MG	0	Pseudanabaenales
Pseudanabaena sp. PCC 7367	0	Pseudanabaenales
Pseudanabaena sp. 'Roaring Creek'	0	Pseudanabaenales
Pseudanabaena sp. Salubria-1	0	Pseudanabaenales
Pseudanabaena sp. SR411	0	Pseudanabaenales
Pseudanabaena sp. SU 2 4	0	Pseudanabaenales
Pseudanabaena sp. UBA1465	0	Pseudanabaenales
Pseudanabaena sp. UWO310	0	Pseudanabaenales
Thermoleptolyngbya sichuanensis PKUAC-SCTA183	0	Pseudanabaenales
Thermoleptolyngbya sp. PKUAC-SCTB121	0	Pseudanabaenales
Thermosynechococcus elongatus PKUAC-SCTE542	0	Pseudanabaenales
Thermosynechococcus sp. CL-1	0	Pseudanabaenales
Thermosynechococcus sp. M3746 W2019 013	0	Pseudanabaenales
Thermosynechococcus sp. M46 R2017 013	0	Pseudanabaenales
Thermosynechococcus sp. M55 K2018 012	0	Pseudanabaenales
Thermosynechococcus sp. M98 K2018 00	0	Pseudanabaenales
Thermosynechococcus sp. NK55a	0	Pseudanabaenales
Thermosynechococcus sp. OHK43	0	Pseudanabaenales
Thermosynechococcus sp. TA-1	0	Pseudanabaenales
Thermosynechococcus vestitus BP-1	0	Pseudanabaenales
Timaviella obliquedivisa GSE-PSE-MK23-08B	0	Pseudanabaenales
Spirulina sp. bin 256	0	Spirulinales
Spirulina sp. DLM2.Bin59	0	Spirulinales
Spirulina subsalsa PCC 9445	0	Spirulinales
Acaryochloridaceae cyanobacterium CSU 3 4	0	Synechococcales
Acaryochloridaceae cyanobacterium CSU 5 19	0	Synechococcales
Acaryochloridaceae cyanobacterium RL 2 7	0	Synechococcales
Acaryochloridaceae cyanobacterium RU 4 10	0	Synechococcales
Acaryochloris marina S15	0	Synechococcales
Acaryochloris sp. 'Moss Beach'	0	Synechococcales
Acaryochloris sp. SU 5 25	0	Synechococcales
Aphanocapsa montana BDHKU210001	0	Synechococcales
Candidatus Paraprochloron terpiosi LD05	0	Synechococcales
Candidatus Paraprochloron terpiosi SP5CPC1	0	Synechococcales
Chamaesiphon sp. CSU 1 12	0	Synechococcales
Cyanobium sp. 16 1	0	Synechococcales
Cyanobium sp. 49614 E6	0	Synechococcales
Cyanobium sp. ARS6	0	Synechococcales
Cyanobium sp. Baikal-G2	0	Synechococcales
Cyanobium sp. BSH.1	0	Synechococcales
Cyanobium sp. BSH.17	0	Synechococcales
Cyanobium sp. FACHB-13342	0	Synechococcales
Cyanobium sp. M30B57	0	Synechococcales
Cyanobium sp. M55B138	0	Synechococcales
Cyanobium sp. MED195	0	Synechococcales
Cyanobium sp. MED843	0	Synechococcales
Cyanobium sp. NAT70	0	Synechococcales
Cyanobium sp. RS427	0	Synechococcales
Cyanobium sp. SAT1300	0	Synechococcales
Cyanobium usitatum str. Tous	0	Synechococcales
Cyanobium usitatum Tobar12.5m-G36	0	Synechococcales
Merismopedia sp. SIO2A8	0	Synechococcales
Prochlorococcaceae cyanobacterium p16x44bins.23	0	Synechococcales
Prochlorococcaceae cyanobacterium p16x60bins.38	0	Synechococcales
Prochlorococcus marinus bv. HNLC1	0	Synechococcales
Prochlorococcus marinus bv. HNLC2	0	Synechococcales
Prochlorococcus marinus CUG1415	0	Synechococcales
Prochlorococcus marinus CUG1416	0	Synechococcales
Prochlorococcus marinus CUG1417	0	Synechococcales
Prochlorococcus marinus CUG1430	0	Synechococcales
Prochlorococcus marinus CUG1431	0	Synechococcales
Prochlorococcus marinus CUG1432	0	Synechococcales
Prochlorococcus marinus CUG1433	0	Synechococcales
Prochlorococcus marinus CUG1434	0	Synechococcales
Prochlorococcus marinus CUG1435	0	Synechococcales
Prochlorococcus marinus CUG1436	0	Synechococcales
Prochlorococcus marinus CUG1437	0	Synechococcales
Prochlorococcus marinus CUG1438	0	Synechococcales
Prochlorococcus marinus CUG1439	0	Synechococcales
Prochlorococcus marinus str. AS9601	0	Synechococcales
Prochlorococcus marinus str. EQPAC1	0	Synechococcales
Prochlorococcus marinus str. GP2	0	Synechococcales
Prochlorococcus marinus str. LG	0	Synechococcales
Prochlorococcus marinus str. MIT 1312	0	Synechococcales
Prochlorococcus marinus str. MIT 1313	0	Synechococcales
Prochlorococcus marinus str. MIT 1318	0	Synechococcales
Prochlorococcus marinus str. MIT 1320	0	Synechococcales
Prochlorococcus marinus str. MIT 1323	0	Synechococcales
Prochlorococcus marinus str. MIT 1327	0	Synechococcales
Prochlorococcus marinus str. MIT 1342	0	Synechococcales
Prochlorococcus marinus str. MIT 9107	0	Synechococcales
Prochlorococcus marinus str. MIT 9116	0	Synechococcales
Prochlorococcus marinus str. MIT 9123	0	Synechococcales
Prochlorococcus marinus str. MIT 9201	0	Synechococcales
Prochlorococcus marinus str. MIT 9202	0	Synechococcales
Prochlorococcus marinus str. MIT 9211	0	Synechococcales
Prochlorococcus marinus str. MIT 9215	0	Synechococcales
Prochlorococcus marinus str. MIT 9301	0	Synechococcales
Prochlorococcus marinus str. MIT 9302	0	Synechococcales
Prochlorococcus marinus str. MIT 9303	0	Synechococcales
Prochlorococcus marinus str. MIT 9311	0	Synechococcales
Prochlorococcus marinus str. MIT 9312	0	Synechococcales
Prochlorococcus marinus str. MIT 9313	0	Synechococcales
Prochlorococcus marinus str. MIT 9314	0	Synechococcales
Prochlorococcus marinus str. MIT 9321	0	Synechococcales
Prochlorococcus marinus str. MIT 9322	0	Synechococcales
Prochlorococcus marinus str. MIT 9401	0	Synechococcales
Prochlorococcus marinus str. MIT 9515	0	Synechococcales
Prochlorococcus marinus str. MU1402	0	Synechococcales
Prochlorococcus marinus str. MU1403	0	Synechococcales
Prochlorococcus marinus str. MU1404	0	Synechococcales
Prochlorococcus marinus str. MU1405	0	Synechococcales
Prochlorococcus marinus str. MU1406	0	Synechococcales
Prochlorococcus marinus str. MU1410	0	Synechococcales
Prochlorococcus marinus str. MU1411	0	Synechococcales
Prochlorococcus marinus str. MU1412	0	Synechococcales
Prochlorococcus marinus str. MU1414	0	Synechococcales
Prochlorococcus marinus str. MU1415	0	Synechococcales
Prochlorococcus marinus str. MU1416	0	Synechococcales
Prochlorococcus marinus str. MU1417	0	Synechococcales
Prochlorococcus marinus str. NATL1A	0	Synechococcales
Prochlorococcus marinus str. NATL2A	0	Synechococcales
Prochlorococcus marinus str. PAC1	0	Synechococcales
Prochlorococcus marinus str. SB	0	Synechococcales
Prochlorococcus marinus str. SS2	0	Synechococcales
Prochlorococcus marinus str. SS35	0	Synechococcales
Prochlorococcus marinus str. SS51	0	Synechococcales
Prochlorococcus marinus str. XMU1401	0	Synechococcales
Prochlorococcus marinus str. XMU1401E	0	Synechococcales
Prochlorococcus marinus str. XMU1408	0	Synechococcales
Prochlorococcus marinus str. XMU1419	0	Synechococcales
Prochlorococcus marinus subsp. marinus str. CCMP1375	0	Synechococcales
Prochlorococcus marinus subsp. pastoris str. CCMP1986	0	Synechococcales
Prochlorococcus marinus XMU1402	0	Synechococcales
Prochlorococcus marinus XMU1403	0	Synechococcales
Prochlorococcus marinus XMU1404	0	Synechococcales
Prochlorococcus marinus XMU1405	0	Synechococcales
Prochlorococcus marinus XMU1406	0	Synechococcales
Prochlorococcus marinus XMU1408	0	Synechococcales
Prochlorococcus marinus XMU1410	0	Synechococcales
Prochlorococcus marinus XMU1411	0	Synechococcales
Prochlorococcus marinus XMU1412	0	Synechococcales
Prochlorococcus marinus XMU1414	0	Synechococcales
Prochlorococcus marinus XMU1419	0	Synechococcales
Prochlorococcus marinus XMU1420	0	Synechococcales
Prochlorococcus marinus XMU1421	0	Synechococcales
Prochlorococcus marinus XMU1422	0	Synechococcales
Prochlorococcus marinus XMU1423	0	Synechococcales
Prochlorococcus marinus XMU1424	0	Synechococcales
Prochlorococcus marinus XMU1425	0	Synechococcales
Prochlorococcus marinus XMU1426	0	Synechococcales
Prochlorococcus marinus XMU1427	0	Synechococcales
Prochlorococcus marinus XMU1428	0	Synechococcales
Prochlorococcus marinus XMU1429	0	Synechococcales
Prochlorococcus sp. AG-311-D23	0	Synechococcales
Prochlorococcus sp. AG-311-J23	0	Synechococcales
Prochlorococcus sp. AG-321-D23	0	Synechococcales
Prochlorococcus sp. AG-321-E21	0	Synechococcales
Prochlorococcus sp. AG-331-M18	0	Synechococcales
Prochlorococcus sp. AG-347-B23	0	Synechococcales
Prochlorococcus sp. AG-347-C10	0	Synechococcales
Prochlorococcus sp. AG-347-E03	0	Synechococcales
Prochlorococcus sp. AG-347-E23	0	Synechococcales
Prochlorococcus sp. AG-347-G18	0	Synechococcales
Prochlorococcus sp. AG-347-G20	0	Synechococcales
Prochlorococcus sp. AG-347-G22	0	Synechococcales
Prochlorococcus sp. AG-347-I04	0	Synechococcales
Prochlorococcus sp. AG-347-I15	0	Synechococcales
Prochlorococcus sp. AG-347-I19	0	Synechococcales
Prochlorococcus sp. AG-347-I21	0	Synechococcales
Prochlorococcus sp. AG-347-I22	0	Synechococcales
Prochlorococcus sp. AG-347-I23	0	Synechococcales
Prochlorococcus sp. AG-347-J06	0	Synechococcales
Prochlorococcus sp. AG-347-J14	0	Synechococcales
Prochlorococcus sp. AG-347-J19	0	Synechococcales
Prochlorococcus sp. AG-347-J20	0	Synechococcales
Prochlorococcus sp. AG-347-J21	0	Synechococcales
Prochlorococcus sp. AG-347-J22	0	Synechococcales
Prochlorococcus sp. AG-347-J23	0	Synechococcales
Prochlorococcus sp. AG-347-K02	0	Synechococcales
Prochlorococcus sp. AG-347-K10	0	Synechococcales
Prochlorococcus sp. AG-347-K15	0	Synechococcales
Prochlorococcus sp. AG-347-K16	0	Synechococcales
Prochlorococcus sp. AG-347-K17	0	Synechococcales
Prochlorococcus sp. AG-347-K18	0	Synechococcales
Prochlorococcus sp. AG-347-K19	0	Synechococcales
Prochlorococcus sp. AG-347-K20	0	Synechococcales
Prochlorococcus sp. AG-347-L02	0	Synechococcales
Prochlorococcus sp. AG-347-L17	0	Synechococcales
Prochlorococcus sp. AG-347-L19	0	Synechococcales
Prochlorococcus sp. AG-347-L20	0	Synechococcales
Prochlorococcus sp. AG-347-L21	0	Synechococcales
Prochlorococcus sp. AG-347-M08	0	Synechococcales
Prochlorococcus sp. AG-347-M15	0	Synechococcales
Prochlorococcus sp. AG-347-M18	0	Synechococcales
Prochlorococcus sp. AG-347-M23	0	Synechococcales
Prochlorococcus sp. AG-347-N19	0	Synechococcales
Prochlorococcus sp. AG-347-N23	0	Synechococcales
Prochlorococcus sp. AG-347-O22	0	Synechococcales
Prochlorococcus sp. AG-355-A09	0	Synechococcales
Prochlorococcus sp. AG-355-A18	0	Synechococcales
Prochlorococcus sp. AG-355-B18	0	Synechococcales
Prochlorococcus sp. AG-355-B23	0	Synechococcales
Prochlorococcus sp. AG-355-G23	0	Synechococcales
Prochlorococcus sp. AG-355-I04	0	Synechococcales
Prochlorococcus sp. AG-355-I20	0	Synechococcales
Prochlorococcus sp. AG-355-J04	0	Synechococcales
Prochlorococcus sp. AG-355-J23	0	Synechococcales
Prochlorococcus sp. AG-355-K03	0	Synechococcales
Prochlorococcus sp. AG-355-K13	0	Synechococcales
Prochlorococcus sp. AG-355-K15	0	Synechococcales
Prochlorococcus sp. AG-355-K20	0	Synechococcales
Prochlorococcus sp. AG-355-K23	0	Synechococcales
Prochlorococcus sp. AG-355-L02	0	Synechococcales
Prochlorococcus sp. AG-355-L20	0	Synechococcales
Prochlorococcus sp. AG-355-L22	0	Synechococcales
Prochlorococcus sp. AG-355-M02	0	Synechococcales
Prochlorococcus sp. AG-355-M18	0	Synechococcales
Prochlorococcus sp. AG-355-N02	0	Synechococcales
Prochlorococcus sp. AG-355-N16	0	Synechococcales
Prochlorococcus sp. AG-355-N22	0	Synechococcales
Prochlorococcus sp. AG-355-O17	0	Synechococcales
Prochlorococcus sp. AG-355-P07	0	Synechococcales
Prochlorococcus sp. AG-355-P11	0	Synechococcales
Prochlorococcus sp. AG-355-P15	0	Synechococcales
Prochlorococcus sp. AG-355-P16	0	Synechococcales
Prochlorococcus sp. AG-355-P18	0	Synechococcales
Prochlorococcus sp. AG-363-A03	0	Synechococcales
Prochlorococcus sp. AG-363-A04	0	Synechococcales
Prochlorococcus sp. AG-363-A16	0	Synechococcales
Prochlorococcus sp. AG-363-B04	0	Synechococcales
Prochlorococcus sp. AG-363-B05	0	Synechococcales
Prochlorococcus sp. AG-363-B11	0	Synechococcales
Prochlorococcus sp. AG-363-B18	0	Synechococcales
Prochlorococcus sp. AG-363-C02	0	Synechococcales
Prochlorococcus sp. AG-363-C20	0	Synechococcales
Prochlorococcus sp. AG-363-G03	0	Synechococcales
Prochlorococcus sp. AG-363-I21	0	Synechococcales
Prochlorococcus sp. AG-363-J23	0	Synechococcales
Prochlorococcus sp. AG-363-K07	0	Synechococcales
Prochlorococcus sp. AG-363-L17	0	Synechococcales
Prochlorococcus sp. AG-363-M17	0	Synechococcales
Prochlorococcus sp. AG-363-M21	0	Synechococcales
Prochlorococcus sp. AG-363-N16	0	Synechococcales
Prochlorococcus sp. AG-363-N20	0	Synechococcales
Prochlorococcus sp. AG-363-O06	0	Synechococcales
Prochlorococcus sp. AG-363-O15	0	Synechococcales
Prochlorococcus sp. AG-363-O16	0	Synechococcales
Prochlorococcus sp. AG-363-P01	0	Synechococcales
Prochlorococcus sp. AG-363-P06	0	Synechococcales
Prochlorococcus sp. AG-363-P08	0	Synechococcales
Prochlorococcus sp. AG-363-P15	0	Synechococcales
Prochlorococcus sp. AG-363-P19	0	Synechococcales
Prochlorococcus sp. AG-388-A01	0	Synechococcales
Prochlorococcus sp. AG-388-A04	0	Synechococcales
Prochlorococcus sp. AG-388-B05	0	Synechococcales
Prochlorococcus sp. AG-388-D03	0	Synechococcales
Prochlorococcus sp. AG-388-E21	0	Synechococcales
Prochlorococcus sp. AG-388-F11	0	Synechococcales
Prochlorococcus sp. AG-388-I18	0	Synechococcales
Prochlorococcus sp. AG-388-J02	0	Synechococcales
Prochlorococcus sp. AG-388-L21	0	Synechococcales
Prochlorococcus sp. AG-388-O02	0	Synechococcales
Prochlorococcus sp. AG-402-A04	0	Synechococcales
Prochlorococcus sp. AG-402-A08	0	Synechococcales
Prochlorococcus sp. AG-402-A21	0	Synechococcales
Prochlorococcus sp. AG-402-B03	0	Synechococcales
Prochlorococcus sp. AG-402-B05	0	Synechococcales
Prochlorococcus sp. AG-402-B10	0	Synechococcales
Prochlorococcus sp. AG-402-B19	0	Synechococcales
Prochlorococcus sp. AG-402-C09	0	Synechococcales
Prochlorococcus sp. AG-402-C22	0	Synechococcales
Prochlorococcus sp. AG-402-E17	0	Synechococcales
Prochlorococcus sp. AG-402-F05	0	Synechococcales
Prochlorococcus sp. AG-402-G06	0	Synechococcales
Prochlorococcus sp. AG-402-G08	0	Synechococcales
Prochlorococcus sp. AG-402-G10	0	Synechococcales
Prochlorococcus sp. AG-402-G19	0	Synechococcales
Prochlorococcus sp. AG-402-G22	0	Synechococcales
Prochlorococcus sp. AG-402-G23	0	Synechococcales
Prochlorococcus sp. AG-402-I05	0	Synechococcales
Prochlorococcus sp. AG-402-I20	0	Synechococcales
Prochlorococcus sp. AG-402-I21	0	Synechococcales
Prochlorococcus sp. AG-402-I22	0	Synechococcales
Prochlorococcus sp. AG-402-I23	0	Synechococcales
Prochlorococcus sp. AG-402-J18	0	Synechococcales
Prochlorococcus sp. AG-402-K04	0	Synechococcales
Prochlorococcus sp. AG-402-K05	0	Synechococcales
Prochlorococcus sp. AG-402-K10	0	Synechococcales
Prochlorococcus sp. AG-402-K14	0	Synechococcales
Prochlorococcus sp. AG-402-K16	0	Synechococcales
Prochlorococcus sp. AG-402-K21	0	Synechococcales
Prochlorococcus sp. AG-402-K22	0	Synechococcales
Prochlorococcus sp. AG-402-L09	0	Synechococcales
Prochlorococcus sp. AG-402-L18	0	Synechococcales
Prochlorococcus sp. AG-402-L19	0	Synechococcales
Prochlorococcus sp. AG-402-L20	0	Synechococcales
Prochlorococcus sp. AG-402-L23	0	Synechococcales
Prochlorococcus sp. AG-402-M15	0	Synechococcales
Prochlorococcus sp. AG-402-M18	0	Synechococcales
Prochlorococcus sp. AG-402-M23	0	Synechococcales
Prochlorococcus sp. AG-402-N08	0	Synechococcales
Prochlorococcus sp. AG-402-N09	0	Synechococcales
Prochlorococcus sp. AG-402-N10	0	Synechococcales
Prochlorococcus sp. AG-402-N17	0	Synechococcales
Prochlorococcus sp. AG-402-N21	0	Synechococcales
Prochlorococcus sp. AG-402-N23	0	Synechococcales
Prochlorococcus sp. AG-402-O16	0	Synechococcales
Prochlorococcus sp. AG-402-O21	0	Synechococcales
Prochlorococcus sp. AG-402-P16	0	Synechococcales
Prochlorococcus sp. AG-402-P18	0	Synechococcales
Prochlorococcus sp. AG-409-A10	0	Synechococcales
Prochlorococcus sp. AG-409-A19	0	Synechococcales
Prochlorococcus sp. AG-409-A22	0	Synechococcales
Prochlorococcus sp. AG-409-B05	0	Synechococcales
Prochlorococcus sp. AG-409-B13	0	Synechococcales
Prochlorococcus sp. AG-409-D09	0	Synechococcales
Prochlorococcus sp. AG-409-G20	0	Synechococcales
Prochlorococcus sp. AG-409-I11	0	Synechococcales
Prochlorococcus sp. AG-409-J16	0	Synechococcales
Prochlorococcus sp. AG-409-J19	0	Synechococcales
Prochlorococcus sp. AG-409-K04	0	Synechococcales
Prochlorococcus sp. AG-409-L14	0	Synechococcales
Prochlorococcus sp. AG-409-L18	0	Synechococcales
Prochlorococcus sp. AG-409-L21	0	Synechococcales
Prochlorococcus sp. AG-409-M05	0	Synechococcales
Prochlorococcus sp. AG-409-N21	0	Synechococcales
Prochlorococcus sp. AG-409-O23	0	Synechococcales
Prochlorococcus sp. AG-409-P01	0	Synechococcales
Prochlorococcus sp. AG-409-P03	0	Synechococcales
Prochlorococcus sp. AG-409-P19	0	Synechococcales
Prochlorococcus sp. AG-412-A14	0	Synechococcales
Prochlorococcus sp. AG-412-C21	0	Synechococcales
Prochlorococcus sp. AG-412-F02	0	Synechococcales
Prochlorococcus sp. AG-412-G19	0	Synechococcales
Prochlorococcus sp. AG-412-I05	0	Synechococcales
Prochlorococcus sp. AG-412-I20	0	Synechococcales
Prochlorococcus sp. AG-412-J13	0	Synechococcales
Prochlorococcus sp. AG-412-L10	0	Synechococcales
Prochlorococcus sp. AG-412-O03	0	Synechococcales
Prochlorococcus sp. AG-412-P08	0	Synechococcales
Prochlorococcus sp. AG-418-C09	0	Synechococcales
Prochlorococcus sp. AG-418-C17	0	Synechococcales
Prochlorococcus sp. AG-418-D13	0	Synechococcales
Prochlorococcus sp. AG-418-F08	0	Synechococcales
Prochlorococcus sp. AG-418-F16	0	Synechococcales
Prochlorococcus sp. AG-418-G18	0	Synechococcales
Prochlorococcus sp. AG-418-G23	0	Synechococcales
Prochlorococcus sp. AG-418-I20	0	Synechococcales
Prochlorococcus sp. AG-418-I21	0	Synechococcales
Prochlorococcus sp. AG-418-J17	0	Synechococcales
Prochlorococcus sp. AG-418-J19	0	Synechococcales
Prochlorococcus sp. AG-418-K17	0	Synechococcales
Prochlorococcus sp. AG-418-M08	0	Synechococcales
Prochlorococcus sp. AG-418-M21	0	Synechococcales
Prochlorococcus sp. AG-418-O02	0	Synechococcales
Prochlorococcus sp. AG-418-O03	0	Synechococcales
Prochlorococcus sp. AG-418-P06	0	Synechococcales
Prochlorococcus sp. AG-418-P13	0	Synechococcales
Prochlorococcus sp. AG-424-A03	0	Synechococcales
Prochlorococcus sp. AG-424-A14	0	Synechococcales
Prochlorococcus sp. AG-424-E18	0	Synechococcales
Prochlorococcus sp. AG-424-E20	0	Synechococcales
Prochlorococcus sp. AG-424-J22	0	Synechococcales
Prochlorococcus sp. AG-424-M03	0	Synechococcales
Prochlorococcus sp. AG-424-P16	0	Synechococcales
Prochlorococcus sp. AG-424-P18	0	Synechococcales
Prochlorococcus sp. AG-424-P23	0	Synechococcales
Prochlorococcus sp. AG-432-B15	0	Synechococcales
Prochlorococcus sp. AG-436-A04	0	Synechococcales
Prochlorococcus sp. AG-436-C05	0	Synechococcales
Prochlorococcus sp. AG-436-C13	0	Synechococcales
Prochlorococcus sp. AG-436-C14	0	Synechococcales
Prochlorococcus sp. AG-436-D21	0	Synechococcales
Prochlorococcus sp. AG-436-E22	0	Synechococcales
Prochlorococcus sp. AG-436-J02	0	Synechococcales
Prochlorococcus sp. AG-436-K22	0	Synechococcales
Prochlorococcus sp. AG-436-M02	0	Synechococcales
Prochlorococcus sp. AG-436-O09	0	Synechococcales
Prochlorococcus sp. AG-436-O11	0	Synechococcales
Prochlorococcus sp. AG-436-P23	0	Synechococcales
Prochlorococcus sp. AG-442-B03	0	Synechococcales
Prochlorococcus sp. AG-442-D10	0	Synechococcales
Prochlorococcus sp. AG-442-M23	0	Synechococcales
Prochlorococcus sp. AG-442-N07	0	Synechococcales
Prochlorococcus sp. AG-442-N17	0	Synechococcales
Prochlorococcus sp. AG-449-C14	0	Synechococcales
Prochlorococcus sp. AG-449-G23	0	Synechococcales
Prochlorococcus sp. AG-449-J16	0	Synechococcales
Prochlorococcus sp. AG-449-O05	0	Synechococcales
Prochlorococcus sp. AG-449-P16	0	Synechococcales
Prochlorococcus sp. AG-459-A09	0	Synechococcales
Prochlorococcus sp. AG-459-B06	0	Synechococcales
Prochlorococcus sp. AG-459-D04	0	Synechococcales
Prochlorococcus sp. AG-459-E08	0	Synechococcales
Prochlorococcus sp. AG-459-J14	0	Synechococcales
Prochlorococcus sp. AG-459-M13	0	Synechococcales
Prochlorococcus sp. AG-459-N19	0	Synechococcales
Prochlorococcus sp. AG-459-O03	0	Synechococcales
Prochlorococcus sp. AG-459-O09	0	Synechococcales
Prochlorococcus sp. AG-459-P07	0	Synechococcales
Prochlorococcus sp. AG-463-F02	0	Synechococcales
Prochlorococcus sp. AG-463-F15	0	Synechococcales
Prochlorococcus sp. AG-463-P14	0	Synechococcales
Prochlorococcus sp. AG-469-F22	0	Synechococcales
Prochlorococcus sp. AG-670-J16	0	Synechococcales
Prochlorococcus sp. AG-670-L08	0	Synechococcales
Prochlorococcus sp. AG-670-M15	0	Synechococcales
Prochlorococcus sp. AG-670-N10	0	Synechococcales
Prochlorococcus sp. AG-670-O07	0	Synechococcales
Prochlorococcus sp. AG-670-O13	0	Synechococcales
Prochlorococcus sp. AG-670-O17	0	Synechococcales
Prochlorococcus sp. AG-673-K22	0	Synechococcales
Prochlorococcus sp. AG-673-L20	0	Synechococcales
Prochlorococcus sp. AG-673-M19	0	Synechococcales
Prochlorococcus sp. AG-673-O02	0	Synechococcales
Prochlorococcus sp. AG-676-L21	0	Synechococcales
Prochlorococcus sp. AG-676-M04	0	Synechococcales
Prochlorococcus sp. AG-676-O21	0	Synechococcales
Prochlorococcus sp. AG-676-P15-1	0	Synechococcales
Prochlorococcus sp. AG-676-P23	0	Synechococcales
Prochlorococcus sp. AG-679-I23	0	Synechococcales
Prochlorococcus sp. AG-679-K21	0	Synechococcales
Prochlorococcus sp. AG-679-M10	0	Synechococcales
Prochlorococcus sp. AG-679-M23	0	Synechococcales
Prochlorococcus sp. AG-679-N02	0	Synechococcales
Prochlorococcus sp. AG-679-N20	0	Synechococcales
Prochlorococcus sp. AG-679-N22	0	Synechococcales
Prochlorococcus sp. AG-679-P15	0	Synechococcales
Prochlorococcus sp. AG-683-O15	0	Synechococcales
Prochlorococcus sp. AG-686-J21	0	Synechococcales
Prochlorococcus sp. AG-686-M10	0	Synechococcales
Prochlorococcus sp. AG-686-O05	0	Synechococcales
Prochlorococcus sp. ALOHA A2.0 50	0	Synechococcales
Prochlorococcus sp. ALOHA A2.0 51	0	Synechococcales
Prochlorococcus sp. ALOHA ZT 50	0	Synechococcales
Prochlorococcus sp. HOT208 60m 805A16	0	Synechococcales
Prochlorococcus sp. HOT208 60m 808A10	0	Synechococcales
Prochlorococcus sp. HOT208 60m 808G21	0	Synechococcales
Prochlorococcus sp. HOT208 60m 808M21	0	Synechococcales
Prochlorococcus sp. HOT208 60m 810B23	0	Synechococcales
Prochlorococcus sp. HOT208 60m 810P02	0	Synechococcales
Prochlorococcus sp. HOT208 60m 813B04	0	Synechococcales
Prochlorococcus sp. HOT208 60m 813G15	0	Synechococcales
Prochlorococcus sp. HOT208 60m 813I02	0	Synechococcales
Prochlorococcus sp. HOT208 60m 813L03	0	Synechococcales
Prochlorococcus sp. HOT208 60m 813O04	0	Synechococcales
Prochlorococcus sp. HOT208 60m 813O14	0	Synechococcales
Prochlorococcus sp. HOT212 60m 824C06	0	Synechococcales
Prochlorococcus sp. HOT212 60m 824E10	0	Synechococcales
Prochlorococcus sp. HOT212 60m 824O11	0	Synechococcales
Prochlorococcus sp. HOT212 60m 826P21	0	Synechococcales
Prochlorococcus sp. MED630	0	Synechococcales
Prochlorococcus sp. MED-G132	0	Synechococcales
Prochlorococcus sp. MED-G72	0	Synechococcales
Prochlorococcus sp. MIT 0601	0	Synechococcales
Prochlorococcus sp. MIT 0602	0	Synechococcales
Prochlorococcus sp. MIT 0603	0	Synechococcales
Prochlorococcus sp. MIT 0604	0	Synechococcales
Prochlorococcus sp. MIT 0701	0	Synechococcales
Prochlorococcus sp. MIT 0702	0	Synechococcales
Prochlorococcus sp. MIT 0703	0	Synechococcales
Prochlorococcus sp. MIT 0801	0	Synechococcales
Prochlorococcus sp. MIT 1303	0	Synechococcales
Prochlorococcus sp. MIT 1306	0	Synechococcales
Prochlorococcus sp. P1344	0	Synechococcales
Prochlorococcus sp. P1361	0	Synechococcales
Prochlorococcus sp. REDSEA-S17 B1	0	Synechococcales
Prochlorococcus sp. REDSEA-S22 B1	0	Synechococcales
Prochlorococcus sp. REDSEA-S23 B1	0	Synechococcales
Prochlorococcus sp. RS01	0	Synechococcales
Prochlorococcus sp. RS04	0	Synechococcales
Prochlorococcus sp. RS50	0	Synechococcales
Prochlorococcus sp. scB241 526B17	0	Synechococcales
Prochlorococcus sp. scB241 526D20	0	Synechococcales
Prochlorococcus sp. scB241 526K3	0	Synechococcales
Prochlorococcus sp. scB241 526N9	0	Synechococcales
Prochlorococcus sp. scB241 527E14	0	Synechococcales
Prochlorococcus sp. scB241 527G5	0	Synechococcales
Prochlorococcus sp. scB241 527I9	0	Synechococcales
Prochlorococcus sp. scB241 527L15	0	Synechococcales
Prochlorococcus sp. scB241 527L22	0	Synechococcales
Prochlorococcus sp. scB241 527N11	0	Synechococcales
Prochlorococcus sp. scB241 527P5	0	Synechococcales
Prochlorococcus sp. scB241 528J14	0	Synechococcales
Prochlorococcus sp. scB241 528J8	0	Synechococcales
Prochlorococcus sp. scB241 528K19	0	Synechococcales
Prochlorococcus sp. scB241 528N17	0	Synechococcales
Prochlorococcus sp. scB241 528N20	0	Synechococcales
Prochlorococcus sp. scB241 528N8	0	Synechococcales
Prochlorococcus sp. scB241 528O2	0	Synechococcales
Prochlorococcus sp. scB241 528P14	0	Synechococcales
Prochlorococcus sp. scB241 528P18	0	Synechococcales
Prochlorococcus sp. scB241 529B19	0	Synechococcales
Prochlorococcus sp. scB241 529C4	0	Synechococcales
Prochlorococcus sp. scB241 529D18	0	Synechococcales
Prochlorococcus sp. scB241 529J11	0	Synechococcales
Prochlorococcus sp. scB241 529J15	0	Synechococcales
Prochlorococcus sp. scB241 529O19	0	Synechococcales
Prochlorococcus sp. scB243 495D8	0	Synechococcales
Prochlorococcus sp. scB243 495G23	0	Synechococcales
Prochlorococcus sp. scB243 495K23	0	Synechococcales
Prochlorococcus sp. scB243 495L20	0	Synechococcales
Prochlorococcus sp. scB243 495N16	0	Synechococcales
Prochlorococcus sp. scB243 495N4	0	Synechococcales
Prochlorococcus sp. scB243 495P20	0	Synechococcales
Prochlorococcus sp. scB243 496A2	0	Synechococcales
Prochlorococcus sp. scB243 496E10	0	Synechococcales
Prochlorococcus sp. scB243 496G15	0	Synechococcales
Prochlorococcus sp. scB243 496M6	0	Synechococcales
Prochlorococcus sp. scB243 496N4	0	Synechococcales
Prochlorococcus sp. scB243 497I20	0	Synechococcales
Prochlorococcus sp. scB243 497J18	0	Synechococcales
Prochlorococcus sp. scB243 498A3	0	Synechococcales
Prochlorococcus sp. scB243 498B22	0	Synechococcales
Prochlorococcus sp. scB243 498B23	0	Synechococcales
Prochlorococcus sp. scB243 498C16	0	Synechococcales
Prochlorococcus sp. scB243 498F21	0	Synechococcales
Prochlorococcus sp. scB243 498G3	0	Synechococcales
Prochlorococcus sp. scB243 498I20	0	Synechococcales
Prochlorococcus sp. scB243 498L10	0	Synechococcales
Prochlorococcus sp. scB243 498N4	0	Synechococcales
Prochlorococcus sp. scB243 498P15	0	Synechococcales
Prochlorococcus sp. scB243 498P3	0	Synechococcales
Prochlorococcus sp. scB245a 518A17	0	Synechococcales
Prochlorococcus sp. scB245a 518A6	0	Synechococcales
Prochlorococcus sp. scB245a 518D8	0	Synechococcales
Prochlorococcus sp. scB245a 518E10	0	Synechococcales
Prochlorococcus sp. scB245a 518I6	0	Synechococcales
Prochlorococcus sp. scB245a 518J7	0	Synechococcales
Prochlorococcus sp. scB245a 518K17	0	Synechococcales
Prochlorococcus sp. scB245a 518O7	0	Synechococcales
Prochlorococcus sp. scB245a 519A13	0	Synechococcales
Prochlorococcus sp. scB245a 519C7	0	Synechococcales
Prochlorococcus sp. scB245a 519D13	0	Synechococcales
Prochlorococcus sp. scB245a 519E23	0	Synechococcales
Prochlorococcus sp. scB245a 519G16	0	Synechococcales
Prochlorococcus sp. scB245a 519L21	0	Synechococcales
Prochlorococcus sp. scB245a 519O11	0	Synechococcales
Prochlorococcus sp. scB245a 519O21	0	Synechococcales
Prochlorococcus sp. scB245a 520B18	0	Synechococcales
Prochlorococcus sp. scB245a 520D2	0	Synechococcales
Prochlorococcus sp. scB245a 520E22	0	Synechococcales
Prochlorococcus sp. scB245a 520F22	0	Synechococcales
Prochlorococcus sp. scB245a 520K10	0	Synechococcales
Prochlorococcus sp. scB245a 521A19	0	Synechococcales
Prochlorococcus sp. scB245a 521B10	0	Synechococcales
Prochlorococcus sp. scB245a 521K15	0	Synechococcales
Prochlorococcus sp. scB245a 521M10	0	Synechococcales
Prochlorococcus sp. scB245a 521O20	0	Synechococcales
Prochlorococcus sp. SS52	0	Synechococcales
Prochlorococcus sp. TMED223	0	Synechococcales
Prochlorococcus sp. UBA1269	0	Synechococcales
Prochlorococcus sp. UBA1273	0	Synechococcales
Prochlorococcus sp. UBA1528	0	Synechococcales
Prochlorococcus sp. UBA3467	0	Synechococcales
Prochlorococcus sp. UBA7448	0	Synechococcales
Prochlorococcus sp. UBA7854	0	Synechococcales
Prochlorococcus sp. W2	0	Synechococcales
Prochlorococcus sp.P1363	0	Synechococcales
Prochloron didemni P2-Fiji	0	Synechococcales
Prochloron didemni P3-Solomon	0	Synechococcales
Prochloron didemni P4-Papua New Guinea	0	Synechococcales
Prochloron sp. SulCav FS08 3 32 3330	0	Synechococcales
Synechococcaceae bacterium Bin 79 3	0	Synechococcales
Synechococcaceae bacterium LLD 019	0	Synechococcales
Synechococcaceae bacterium WB4 1 0192	0	Synechococcales
Synechococcaceae bacterium WB4 2 0805	0	Synechococcales
Synechococcaceae bacterium WB4 2 0811	0	Synechococcales
Synechococcaceae bacterium WB5 2A 257	0	Synechococcales
Synechococcaceae bacterium WB5 2B 268	0	Synechococcales
Synechococcaceae bacterium WB6 1A 059	0	Synechococcales
Synechococcaceae bacterium WB6 1B 055	0	Synechococcales
Synechococcaceae bacterium WB6 3A 227	0	Synechococcales
Synechococcaceae bacterium WB6 3B 236	0	Synechococcales
Synechococcaceae bacterium WB7 1B 046	0	Synechococcales
Synechococcaceae bacterium WB7 1C 051	0	Synechococcales
Synechococcaceae bacterium WB7 3xG 012	0	Synechococcales
Synechococcaceae bacterium WB8 1A 041	0	Synechococcales
[truncated: 22 more rows]

## Sheet: Supplementary Table 3
Supplementary Table 3. Occurrence of the RF00442 (Guanidine-I riboswitch) motif among cyanobacterial genomes.
Strain	Order	RF00442(Gd-I RS)	CgdA	CgdB	GcA	AtzF	GdmH	GhaA	GhaB	ABC1	ABC2	ABC3	SssF
Aliterella atlantica CENA595	Chroococcidiopsidales	1					KJH71297	KJH71296		KJH71294	KJH71293	KJH71292
Chamaesiphon minutus PCC 6605	Synechococcales	1	AFY95464	AFY95463	AFY95459
Chlorogloeopsis fritschii PCC 6912	Nostocales	1					RUR83162	RUR83163	RUR83164	RUR83165	RUR83166	RUR83167
Chondrocystis sp. NIES-4102	Chroococcales	1					BAZ43018	BAZ43019	BAZ43020	BAZ43021	BAZ43022	BAZ43024
Chroococcidiopsis thermalis PCC 7203	Chroococcidiopsidales	1					AFY87223	AFY87224	AFY87225	AFY87226	AFY87227	AFY87228
Cyanobacterium aponinum PCC 10605	Chroococcales	1					AFZ55267	AFZ55266	AFZ55265	AFZ55264	AFZ55263	AFZ55262
Cylindrospermopsis raciborskii CS-505	Nostocales	1					OBU77336	OBU77337	OBU77338	OBU77339	OBU77340	OBU77341
Dactylococcopsis salina PCC 8305	Synechococcales	1					AFZ52034	AFZ52032		AFZ52031	AFZ52030	AFZ52029
Fischerella sp. NIES-3754	Nostocales	1					BAU07715	BAU07716	BAU07717	BAU07719	BAU07720	BAU07721
Gloeobacter violaceus PCC 7421	Gloeobacterales	1	BAC88901	BAC88900	BAC88899	BAC88902
Gloeomargarita lithophora Alchichica-D10	Gloeoemargaritales	1	APB34305	APB34304	APB33973	APB34309
Gloeothece verrucosa PCC 7822	Chroococcales	1					ADN14022	ADN14023	ADN14024	ADN14025	ADN14026	ADN14027
Halomicronema hongdechloris C2206	Synechococcales	1					ASC71072	ASC71073	ASC71074	ASC71075	ASC71076	ASC71077
Halothece sp. PCC 7418	Chroococcales	1					AFZ44104	AFZ44103	AFZ44102	AFZ44101	AFZ44100	AFZ44099
Hyella patelloides LEGE 07179	Pleurocapsales	1					VEP11770	VEP11768	VEP11767	VEP11766	VEP11765	VEP11764
Leptolyngbya ohadii IS1	Synechococcales	1	WP_088889008	WP_088889007
Leptolyngbya sp. PCC 7375	Synechococcales	1					EKU98767	EKU98768	EKU98769	EKU98770	EKU98771	EKU98772
Limnospira indica PCC 8005	Oscillatoriales	1					CDM96085	CDM96084	CDM96083	CDM96082	CDM96081	CDM96080
Mastigocladopsis repens PCC 10914	Nostocales	1					WP_017316377	WP_017316376	WP_017316375	WP_017316374	WP_017316373	WP_017316371
Microcoleus sp. PCC 7113	Oscillatoriales	1					AFZ15992	AFZ15991	AFZ15990	AFZ15988	AFZ15987	AFZ15986
Microcoleus vaginatus FGP-2	Oscillatoriales	1	EGK89959	EGK89960	EGK89961	EGK89955				EGK89956	EGK89957
Microcystis aeruginosa NIES-843	Chroococcales	1					BAG01706	BAG01708	BAG01709	BAG01710	BAG01711	BAG01712
Oscillatoria nigro-viridis PCC 7112	Oscillatoriales	1	AFZ06108	AFZ06109	AFZ06131	AFZ06104
Oxynema sp. CENA135	Oscillatoriales	1					MBK4729695	MBK4729694	MBK4729693	MBK4729692	MBK4729691	MBK4729690
Planktothrix agardhii NIES-204	Oscillatoriales	1					BBD55548	BBD55547	BBD55546	BBD55545	BBD55544	BBD55543
Pleurocapsa sp. CCALA 161	Pleurocapsales	1					PSB08585	PSB08582	PSB08581	PSB08580	PSB08579	PSB08577
Pleurocapsa sp. PCC 7319	Pleurocapsales	1					WP_019504470	WP_026102361	WP_051044407	WP_019504473	WP_019504474	WP_026102362
Pleurocapsa sp. PCC 7327	Pleurocapsales	1					AFY77005	AFY77004	AFY77003	AFY77002	AFY77001	AFY77000
Raphidiopsis brookii D9	Nostocales	1					EFA72975	EFA72974	EFA72973	EFA72972	EFA72971	EFA72970
Snowella sp. ULC335bin1	Synechococcales	1					PZV28056	PZV28054		PZV28053	PZV28052	PZV28051
Spirulina major PCC 6313	Spirulinales	1					WP_204104476	WP_204104477	WP_204104478	WP_204104479	WP_204104480	WP_204104481	WP_072622425.1
Spirulina sp. SIO3F2	Spirulinales	1					NEO85051	NEO85052	NEO85053	NEO85054	NEO85055
Stanieria sp. NIES-3757	Pleurocapsales	1					BAU65832	BAU65833	BAU65834	BAU65835	BAU65836	BAU65837
Synechocystis sp. PCC 6714	Synechococcales	1					AIE75743	AIE75742	AIE75741	AIE75740	AIE75739	AIE75738
Synechocystis sp. PCC 6803	Synechococcales	1					sll1077	sll1078	sll1079	sll1080	sll1081	sll1082
Acaryochloris marina MBIC11017	Synechococcales	2					ABW27833	ABW27834	ABW27835	ABW27836	ABW27837	ABW27838	ABW33223.1
Amazonocrinis nigriterrae CENA67	Nostocales	2	MBH8564982.1	MBH8564981.1	MBH8564980.1	MBH8564979.1		MBH8564983.1	MBH8564984.1	MBH8564985.1
Chroococcidiopsis sp. TS-821	Chroococcidiopsidales	2	PPS44989	PPS44988	PPS44987					PPS43331	PPS43332	PPS43333
Chroogloeocystis siderophila 5.2 s.c.1	Chroococcales	2	OKH24254	OKH24253	OKH24252					OKH28326	OKH28325	OKH28326
Cyanothece sp. PCC 7425	Oscillatoriales	2	ACL44665	ACL44664	ACL44663					ACL45583	ACL45582	ACL45581
Gloeocapsa sp. PCC 7428	Chroococcales	2	AFZ30457	AFZ30456	AFZ30455					AFZ33160	AFZ33161	AFZ33162
Gloeocapsopsis crepidinum LEGE 06123	Chroococcales	2					MBE9192779	MBE9192778	MBE9192777	MBE9192776	MBE9192775	MBE9192774
Kamptonema sp. PCC 6506	Oscillatoriales	2	CBN59117	CBN59118	CBN59119					CBN59113	CBN59114	CBN59116
Leptolyngbya boryana dg5	Synechococcales	2	BAS62055	BAS62054	BAS62053					BAS62056	BAS62057	BAS62058
Leptolyngbya sp. NIES-2104	Synechococcales	2	GAP94789	GAP94790	GAP94791					GAP94788	GAP94787	GAP94796
Leptolyngbya sp. NIES-3755	Synechococcales	2	BAU11646	BAU11647	BAU11648					BAU11637	BAU11638	BAU11639
Nodosilinea nodulosa PCC 7104	Synechococcales	2					WP_017299264	WP_017299262	WP_017299261	WP_017298956	WP_083887178	WP_017298954
Nostoc flagelliforme CCNUN1	Nostocales	2	AUB35226	AUB35225	AUB35223	AUB35222
Phormidesmis priestleyi ULC007	Synechococcales	2	PSB17740	PSB17741	PSB17742					PSB20171	PSB20172	PSB20173
Pseudanabaena biceps PCC 7429	Synechococcales	2	ELS31488	ELS31489	ELS31490					ELS30362	ELS30361	ELS30360
Pseudanabaena frigida ULC066bin1	Synechococcales	2	PZO40500	PZO40501	PZO40502					PZO40499	PZO40498	PZO40497
Synechococcus sp. PCC 7502	Synechococcales	2	AFY72861	AFY72860	AFY72856					AFY72863	AFY72864	AFY72865
Shackletoniella antarctica ULC041bin1	Synechococcales	3					PZO43653	PZO43654	PZO43657	PZO43912	PZO43913	PZO43914	PZO37966
Leptolyngbya boryana IAM M-101	Synechococcales	2	BAS55707.1	BAS55706.1	BAS55705.1					BAS55708.1	BAS55710.1	BAS55709.1
Leptolyngbya boryana NIES-2135	Synechococcales	2	BAY58133.1	BAY58134.1	BAY58135.1					BAY58132.1	BAY58130.1	BAY58131.1
Microcoleus asticus IPMA8	Oscillatoriales	1	NQE33415.1	NQE33416.1	NQE33417.1	NQE33411.1				NQE33412.1	NQE33413.1	NQE33414.1
Microcoleus sp. FACHB-45	Oscillatoriales	1	MBD2010522.1	MBD2010523.1	MBD2010524.1	MBD2010518.1				MBD2010519.1	MBD2010520.1	MBD2010521.1
Nostoc edaphicum CCNP1411	Nostocales	1	QMS91484.1	QMS91485.1	QMS91486.1
Phormidium sp.FACHB-592	Synechococcales	1	MBD2073162.1	MBD2073163.1		MBD2073164.1				MBD2077655.1	MBD2077654.1	MBD2077653.1
Phormidium tenue FACHB-886	Synechococcales	1	MBD3883629.1	MBD3883630.1	MBD3883631.1					MBD3880493.1	MBD3880494.1	MBD3880495.1

## Sheet: Supplementary Table 4
Supplementary Table 4. List of oligonucleotides.
Primer	Sequence (5’-3’)
Cloning of reporter plasmids
GUA-up	ACGCGTCGACTGAGGATTTGTTGATATTTGCATGG
GUA-down	GGGGTACCAAAATTCTCCTGTTACGGTTGGACG
M2-1-down	GCGCGATCGGAACCCTAGttGCTCATCCTTATT
M2-2-up	aaCTAGGGTTCCGATCGCGCCTTTGTGTGT
M3-1-down	AGTCGGCTGCAACTCTTGGACCAGCCATCAC
M3-2-up	TCCAAGAGTTGCAGCCGACTTTGAGAGTCGGT
Cloning and verification of N.flagelliforme mutants
guide-RNA	CAAACTAAATAAGGATGAGC
Ctrl-1-up	gcagaaattcgatatctagatcTTCTAGCTTTGCTGTTAACGACTGC
Ctrl-1-down	CCCTAGTTGCCAATTTGAATTTGCGAAACTTCTAC
Ctrl-2-up	ATTCAAATTGGCTTCTAGGGTTCCGATCGCGC
Ctrl-2-down	cgcaacgttgttgccattgcTAAAGCTACCCGGTTTTTCCTCGCC
M2-1-up	gcagaaattcgatatctagatcTTCTAGCTTTGCTGTTAACGACTGC
M2-1-down	CCCTAGTTGCCAATTTGAATTTGCGAAACTTCTAC
M2-2-up	ATTCAAATTGGCAACTAGGGTTCCGATCGCGC
M2-2-down	cgcaacgttgttgccattgcTAAAGCTACCCGGTTTTTCCTCGCC
M3-1-up	gcagaaattcgatatctagatcTTCTAGCTTTGCTGTTAACGACTGC
M3-1-down	CCCTAGTTGCCAATTTGAATTTGCGAAACTTCTAC
M3-2-up	ATTCAAATTGGCAACTAGGGTTCCGATCGCGC
M3-2-down	TCTCAAAGTCTCTCAAAGTCGGCTGCAACTCTTGG
M3-3-up	CTTTGAGAGACTTTGAGAGTCGGTCACACGGCGG
M3-3-down	cgcaacgttgttgccattgcTAAAGCTACCCGGTTTTTCCTCGCC
ITC analysis
gua-UTR-T7_fw	TAATACGACTCACTATAGGGGAGCAAACATTGTGTTAAAATTATT
gua-UTR-T7_rev	AAAATTCTCCTGTTACGGTTGGACG
gua-M1-T7-M1up	AAACTAAATACCAGACAGTATGACTGTATTGGTAA
gua-M1-T7-M1down	TACTGTCTGGTATTTAGTTTGCAATTTGAATTTGC
RT-PCR
16s rDNA-up	AGGTGGCTGTGTAAGTCTGCTGT
16s rDNA-down	TTCGCCACTGGTGTTCTTCCTG
cgdA-up	TTGCGTGTAACTGATTTGGAAG
cgdA-down	AGATCGTGATAGCCGGAGGT
cgdB-up	AGGAGTTGGCTGCCCGTAA
cgdB-down	CCCAGCGTATCGTGTTTGC
gcA-up	GCAGTCTACTCCCAAGCTGATG
gcA-down	TGCCACATTCTCGCTCAAA
atzF-up	GCCTTATGGAGCCTGTAGCA
atzF-down	GAAACGCAATCGAGCGAAC
efe-up	AAGGTATTTACTTCGGTGGAGAAC
efe-down	GATAATGATGGATTGGGAGGG

## Sheet: Supplementary Table 5
Supplementary Table 5. List of plasmids and strains used in this study.
Plasmids	Plasmid backbone	Marker	Description
pRL25C-Omega-Promoter-luxAB(WT)	pRL25C-Omega-luxAB	Spectinomycin	Reporter plasmid pRL25C carrying 5’ UTR of cgdA from N. flagelliforme CCNUN1
pRL25C-Omega-Promoter-luxAB(M2)	pRL25C-Omega-luxAB	Spectinomycin	Same as pRL25C-Omega-Promoter-luxAB(WT) but carrying point mutations at position +154/+155 (+1 = TSS)
pRL25C-Omega-Promoter-luxAB(M3)	pRL25C-Omega-luxAB	Spectinomycin	Same as pRL25C-Omega-Promoter-luxAB(M2) but carrying M2-complementary point mutations at position +103/+104 (+1 = TSS)
pCpf1-DR-Ctrl	pCpf1	Spectinomycin	pCpf1-Plasmid carrying a N. flagelliforme mutation construct for the cgdA-UTR, used to generate the control strain cgdA::Ctrl which contains the WT 5’ UTR of cgdA
pCpf1-DR-M2	pCpf1	Spectinomycin	as pCpf1-DR-Ctrl but carrying the mutation M2 (see description of pRL25C-Omega-Promoter-luxAB(M2))
pCpf1-DR-M3	pCpf1	Spectinomycin	as pCpf1-DR-M2 but carrying the mutation M3 (see description of pRL25C-Omega-Promoter-luxAB(M3))
Strains	Contained plasmid	Amtobiotics	Usage
Ctrl-luxAB	pRL25C-Omega-Promoter-luxAB(WT)	Spectinomycin	Assessment of promoter activities in response to nitrogen starvation and periodic desiccation
M2-luxAB	pRL25C-Omega-Promoter-luxAB(M2)	Spectinomycin	Assessment of promoter activities in response to nitrogen starvation and periodic desiccation
M3-luxAB	pRL25C-Omega-Promoter-luxAB(M3)	Spectinomycin	Assessment of promoter activities in response to nitrogen starvation and periodic desiccation
cgdA::Ctrl	pCpf1-DR-Ctrl	None	Phenotype analysis analysis after desiccation-rehydration cycles under nitrogen-replete and nitrogen-deplete conditions, and metabolic analysis during rehydration
cgdA::M2	pCpf1-DR-M2	None	Phenotype analysis analysis after desiccation-rehydration cycles under nitrogen-replete and nitrogen-deplete conditions, and metabolic analysis during rehydration
cgdA::M3	pCpf1-DR-M3	None	Phenotype analysis analysis after desiccation-rehydration cycles under nitrogen-replete and nitrogen-deplete conditions, and metabolic analysis during rehydration
