# Supplementary material for: Guanidine fuels rapid resurrection of desert cyanobacteria
Source: Research Square preprint supplement (doi:10.21203/rs.3.rs-8507520/v1), 2026-01-22
Supplement: Supplementary file 2 [file 79bd847d0c74ca02ac723a13.xlsx]

## Sheet: Legend
Supplementary Data 1. List of differentially expressed genes (FDR < 0.05, Log2FC > 0.5).
Table label
Ctrl_3h_0h	Ctrl 3h vs Ctrl 0h
M2_3h_0h	M2 3h vs M2 0h
M2_0h_ctrl_0h	M2 0h vs Ctrl 0h
M2_3h_ctrl_3h	M2 3h vs Ctrl 3h

## Sheet: Ctrl_3h_0h
Gene ID	logFC	logCPM	F	PValue	FDR	Ctrl_0h_1	Ctrl_0h_2	Ctrl_0h_3	Ctrl_3h_1	Ctrl_3h_2	Ctrl_3h_3	Gene name	Gene description
COO91_01218	6.56732	-0.266842	22.1354	0.000282544	0.00156432	0	0	0	18	14	13	E2.4.1.46	1,2-diacylglycerol 3-beta-galactosyltransferase [EC:2.4.1.46]
COO91_07739	6.20446	-0.497766	20.0357	0.000444679	0.00229857	0	0	0	13	9	13	none	IS4 transposase
COO91_10597	6.04999	-0.190869	15.027	0.00149292	0.00634813	0	0	0	13	15	3	none	hypothetical protein
COO91_08409	5.99183	-0.398333	29.3887	7.09818e-05	0.000484125	0	0	0	10	10	10	none	hypothetical protein
COO91_01451	5.89627	-0.939973	20.3584	0.000413971	0.00216047	0	0	0	7	10	11	none	Transposase
COO91_08157	5.8874	-0.48331	22.5238	0.000260587	0.00146221	0	0	0	10	7	11	none	hypothetical protein
COO91_10132	5.87617	-0.660325	15.9007	0.00119052	0.00526359	0	0	0	9	3	16	none	Nucleotide-binding universal stress protein%2C UspA family
COO91_01937	5.73188	-0.407963	17.5097	0.000798701	0.00376367	0	0	0	11	8	6	-	putative transposase
COO91_08637	5.57149	-1.10867	10.1431	0.00615654	0.020329	0	0	0	7	13	2	none	hypothetical protein
COO91_09550	5.36546	-0.868891	10.2032	0.00603894	0.0200262	0	0	0	2	12	5	none	Alkylated DNA repair dioxygenase AlkB
COO91_01413	5.34763	-1.10979	11.1429	0.00449743	0.0157134	0	0	0	9	7	3	none	hypothetical protein
COO91_09442	5.34475	-1.00803	8.17138	0.0119641	0.0347091	0	0	0	4	6	9	none	hypothetical protein
COO91_08331	5.27329	-1.16466	11.2119	0.00440327	0.0154643	0	0	0	5	7	6	none	Spore coat polysaccharide biosynthesis protein SpsF%2C cytidylyltransferase family
COO91_09999	5.26561	-1.47114	11.7955	0.00558655	0.018785	0	0	0	8	5	5	none	hypothetical protein
COO91_11235	5.2622	-1.05479	7.88298	0.0132602	0.0376615	0	0	0	7	4	7	none	Essential recombination function protein
COO91_09628	5.25546	-0.868059	13.7376	0.00211335	0.00842229	0	0	0	7	2	9	none	Oligopeptide transport system permease protein OppC
COO91_04437	5.1942	-1.10767	13.028	0.00257793	0.00997265	0	0	0	5	7	5	none	putative protein family Ycf66
COO91_10157	5.11057	-1.05057	12.6874	0.00284164	0.010747	0	0	0	4	7	5	none	hypothetical protein
COO91_09207	5.10633	-0.658799	15.0057	0.00150129	0.00637505	0	0	0	5	6	5	none	hypothetical protein
COO91_01217	5.00978	-1.12653	8.18757	0.0118958	0.0345665	0	0	0	6	4	5	glf	UDP-galactopyranose mutase [EC:5.4.99.9]
COO91_01419	5.006	-1.36814	9.29624	0.00812579	0.0255456	0	0	0	5	3	7	none	hypothetical protein
COO91_07344	4.91487	-0.821864	10.2233	0.00600028	0.0199163	0	0	0	4	4	6	none	hypothetical protein
COO91_06554	4.82089	-1.1115	8.97275	0.00906183	0.0277862	0	0	0	3	6	4	none	hypothetical protein
COO91_10751	4.82062	-0.843954	8.17487	0.0119494	0.0346849	0	0	0	2	6	5	none	hypothetical protein
COO91_10739	4.8164	-0.716499	11.2914	0.00429758	0.015162	0	0	0	4	5	4	none	NADPH:qui reductase or related Zn-dependent oxidoreductase
COO91_09453	4.81273	-1.3074	7.5566	0.0149258	0.0415421	0	0	0	4	4	5	none	hypothetical protein
COO91_10925	4.80871	-1.21909	10.8663	0.00489875	0.0168867	0	0	0	4	3	6	none	hypothetical protein
COO91_01537	4.80857	-1.13834	9.47518	0.00765583	0.0242584	0	0	0	5	3	5	none	hypothetical protein
COO91_09388	4.80829	-1.65156	8.55701	0.0138204	0.0389968	0	0	0	6	3	4	none	hypothetical protein
COO91_04436	4.80826	-1.19276	8.82171	0.0095408	0.028919	0	0	0	7	3	3	none	hypothetical protein
COO91_09445	4.7068	-1.0785	7.27985	0.0165288	0.0450762	0	0	0	4	5	3	none	hypothetical protein
COO91_08512	4.70649	-0.806505	8.87641	0.00936406	0.0284994	0	0	0	4	5	3	none	Serine/threonine protein kinase
COO91_09541	4.69017	-1.3416	8.21226	0.0117925	0.0343215	0	0	0	5	1	6	none	hypothetical protein
COO91_10249	4.57929	-1.24847	8.60738	0.0102712	0.0306183	0	0	0	4	3	4	none	N-acetylglucosaminyl deacetylase%2C LmbE family
COO91_10495	4.57926	-1.5018	7.52036	0.0151252	0.0419782	0	0	0	4	3	4	none	Prophage antirepressor
COO91_08099	4.45358	-1.50351	7.65161	0.0144173	0.0403238	0	0	0	3	4	3	none	Site-specific DNA-cytosine methylase
COO91_00919	4.36694	-0.149426	16.7076	0.000768074	0.00363517	1	0	0	8	29	12	none	ABC-type multidrug transport system%2C ATPase and permease component
COO91_00472	4.14178	-1.30672	7.30346	0.0163846	0.0447243	0	0	0	3	2	3	none	hypothetical protein
COO91_07738	3.77171	-0.512154	13.2385	0.00203366	0.00818606	0	0	1	13	9	11	none	IS4 transposase
COO91_11212	3.74499	1.36927	71.6196	1.69104e-07	2.79022e-06	2	1	4	75	56	60	none	hypothetical protein
COO91_01050	3.73134	-0.738517	15.5568	0.0010475	0.00473804	1	0	0	7	10	15	none	hypothetical protein
COO91_07016	3.68197	0.303995	16.367	0.000840918	0.00393667	2	0	0	16	20	20	none	Glycopeptide antibiotics resistance protein
COO91_09214	3.54349	-0.681375	10.77	0.00440281	0.0154643	0	1	0	13	8	7	none	Cell division ATPase FtsA
COO91_09473	3.52376	-0.217815	10.786	0.00437962	0.0154062	0	0	1	12	2	14	none	hypothetical protein
COO91_10398	3.51215	-0.760564	8.27207	0.0104841	0.0311062	1	0	0	5	16	6	none	hypothetical protein
COO91_01203	3.48772	-0.345394	10.5154	0.00478912	0.0165615	0	1	0	7	6	14	none	hypothetical protein
COO91_10271	3.43654	-0.171276	13.6096	0.00182197	0.00748141	0	0	2	12	19	16	none	hypothetical protein
COO91_07718	3.39293	-0.0222535	24.4048	0.000124448	0.000774152	1	1	0	14	11	21	none	Endonuclease YncB%2C thermonuclease family
COO91_01049	3.37763	-0.61084	11.5222	0.00345152	0.0126513	2	0	0	10	6	30	none	Large exoprotein involved in heme utilization or adhesion
COO91_10928	3.27007	4.90921	230.302	2.59803e-11	1.51189e-09	42	49	70	937	1172	924	galE	UDP-glucose 4-epimerase [EC:5.1.3.2]
COO91_01461	3.25844	-0.911676	11.995	0.002973	0.0111503	1	0	0	11	6	6	none	hypothetical protein
COO91_10930	3.2557	1.3218	54.7544	1.0422e-06	1.29293e-05	5	4	3	70	93	64	none	hypothetical protein
COO91_10400	3.15468	-0.416352	9.58519	0.0065643	0.0213626	1	0	1	22	10	7	none	Type I restriction-modification system%2C DNA methylase subunit
COO91_09876	3.1458	-0.884736	9.97429	0.00574428	0.0192257	1	0	0	5	10	6	none	hypothetical protein
COO91_01101	3.08878	-0.663041	14.5608	0.00138376	0.00596725	1	0	1	14	13	10	none	putative transposase YbfD/YdcC associated with H repeats
COO91_00993	3.07895	-0.642901	8.61846	0.00923995	0.0282045	0	1	0	6	9	5	recD	exodeoxyribonuclease V alpha subunit [EC:3.1.11.5]
COO91_07969	3.06984	0.0394445	15.7391	0.000996463	0.00454327	2	1	0	19	17	17	none	hypothetical protein
COO91_10049	3.00953	-1.19068	7.73913	0.0127874	0.0366652	0	1	0	4	9	6	none	hypothetical protein
COO91_09429	2.94811	5.75074	414.365	2.27044e-13	3.61401e-11	111	137	108	1739	1953	1657	copB	Cu2+-exporting ATPase [EC:3.6.3.4]
COO91_09476	2.93802	4.94743	28.9144	0.000315224	0.00171198	49	40	55	451	1319	328	none	Transposase
COO91_09416	2.92388	0.0136889	19.1223	0.000415168	0.00216558	2	0	1	17	15	16	none	Endonuclease YncB%2C thermonuclease family
COO91_08677	2.9136	0.394284	27.0629	7.20782e-05	0.000490676	2	1	2	26	27	24	none	hypothetical protein
COO91_00709	2.87891	5.74537	214.992	6.56571e-11	3.24508e-09	110	134	137	1659	2283	1489	none	Glycosyltransferase involved in cell wall bisynthesis
COO91_10130	2.85493	0.38761	14.3217	0.00150748	0.00639879	3	0	2	18	14	43	none	hypothetical protein
COO91_10389	2.85187	0.687352	34.6587	1.79708e-05	0.000149672	1	4	2	25	42	34	none	hypothetical protein
COO91_02436	2.8503	5.60777	83.8461	8.45273e-07	1.0879e-05	82	61	115	1035	1697	882	none	Membrane protein involved in the export of O-antigen and teichoic acid
COO91_04109	2.8442	-0.641534	11.4144	0.00357244	0.0130239	1	1	0	7	12	12	none	hypothetical protein
COO91_01160	2.84292	-1.11089	7.26978	0.0153001	0.0423659	1	0	0	6	7	4	none	hypothetical protein
COO91_01370	2.83924	-1.10678	7.17427	0.0158776	0.0436877	1	0	0	6	6	5	none	hypothetical protein
COO91_09443	2.83923	-0.631981	8.37294	0.0101033	0.0302679	1	0	0	6	6	5	none	Essential recombination function protein
COO91_10447	2.83653	1.29945	32.8269	2.46135e-05	0.000196183	0	5	5	36	53	53	none	hypothetical protein
COO91_01172	2.82186	-0.280014	7.43332	0.0143659	0.0402402	1	1	0	3	21	6	none	hypothetical protein
COO91_08329	2.81742	0.577385	22.7747	0.000177217	0.00104648	2	0	4	26	18	43	none	DNA-directed RNA polymerase%2C sigma subunit
COO91_03478	2.77182	0.807597	29.2762	4.69347e-05	0.000342188	1	2	5	34	48	27	none	hypothetical protein
COO91_10517	2.7604	-0.794543	8.43871	0.00986337	0.0297219	0	1	0	4	6	6	none	hypothetical protein
COO91_00351	2.7519	2.53731	54.3811	1.17559e-06	1.43438e-05	12	12	7	98	204	102	none	Transposase
COO91_01379	2.72033	4.57483	97.196	6.70056e-08	1.24831e-06	34	36	65	513	772	444	none	protein of unknown function DUF4397
COO91_10601	2.72025	0.276177	20.1451	0.000324198	0.00175368	0	4	2	38	25	17	none	DNA replication protein DnaD
COO91_02151	2.66437	1.34767	40.5161	7.0654e-06	6.70253e-05	2	3	4	41	43	30	none	Glycosyltransferase involved in cell wall bisynthesis
COO91_07783	2.66065	0.157322	15.4562	0.00107692	0.00484076	2	0	1	14	11	15	none	Endonuclease YncB%2C thermonuclease family
COO91_03844	2.65897	1.11097	16.1049	0.00109408	0.00490975	4	4	2	30	78	15	none	hypothetical protein
COO91_09527	2.64938	8.99824	189.844	9.23543e-10	3.15345e-08	1309	1051	1274	12732	19004	12673	none	Large exoprotein involved in heme utilization or adhesion
COO91_02619	2.64864	5.43343	212.847	4.85034e-11	2.55009e-09	27	29	42	402	368	443	DPM1	dolichol-phosphate mannosyltransferase [EC:2.4.1.83]
COO91_09750	2.64042	-0.498618	12.5105	0.00253441	0.00982187	1	1	0	8	8	11	none	hypothetical protein
COO91_09452	2.6238	0.0594881	15.4585	0.00107622	0.00483965	2	0	2	21	17	13	none	hypothetical protein
COO91_07976	2.6203	0.382398	17.641	0.000602205	0.00295613	1	4	0	21	27	14	none	Ubiqui/menaqui biosynthesis C-methylase UbiE
COO91_02909	2.60769	0.865087	31.436	3.15087e-05	0.000242439	5	1	2	29	37	32	none	hypothetical protein
COO91_09731	2.5936	-0.73784	9.00533	0.00804365	0.02535	1	1	0	9	10	7	none	hypothetical protein
COO91_10252	2.5904	-0.142483	8.37621	0.0100912	0.0302485	3	0	0	13	12	13	rsbW	serine/threonine-protein kinase RsbW [EC:2.7.11.1]
COO91_05515	2.58002	-0.200954	8.84697	0.00851077	0.0264485	0	1	1	7	5	14	none	hypothetical protein
COO91_03709	2.57896	7.03959	113.195	1.03614e-07	1.82361e-06	306	281	363	2739	5086	3167	none	Polysaccharide pyruvyl transferase family protein WcaK
COO91_04894	2.57672	-0.465534	7.99607	0.0116122	0.0338607	0	1	1	10	4	12	none	hypothetical protein
COO91_10927	2.57197	4.9478	170.391	2.77155e-10	1.10698e-08	101	82	62	808	1137	892	none	Lysophospholipase L1 or related esterase
COO91_08161	2.56911	0.362271	17.2829	0.000660567	0.00319481	3	1	2	16	41	14	none	hypothetical protein
COO91_08424	2.5492	-0.234885	12.469	0.00256685	0.00993334	1	0	2	12	10	15	none	hypothetical protein
COO91_10401	2.50595	-0.100242	7.32965	0.0149503	0.0415889	2	0	1	11	8	17	none	Bacteriophage protein gp37
COO91_02434	2.50332	5.3129	212.831	4.85328e-11	2.55009e-09	84	80	90	834	1035	949	none	O-antigen ligase
COO91_08158	2.49517	0.638563	22.5479	0.000186378	0.00109233	1	3	2	27	15	27	none	Essential recombination function protein
COO91_08187	2.49385	1.03964	37.3958	1.14686e-05	0.000102169	6	2	3	45	31	49	none	hypothetical protein
COO91_00985	2.49232	0.125145	8.43002	0.0106695	0.0315882	4	0	2	16	32	20	none	transposase
COO91_11009	2.48758	-0.311302	8.10898	0.0111349	0.0326825	1	1	0	7	12	5	none	hypothetical protein
COO91_10273	2.47875	5.55538	216.882	4.18128e-11	2.29737e-09	101	92	131	1060	1334	1143	none	Cell division ATPase FtsA
COO91_10272	2.4595	4.62561	65.4378	1.70009e-06	1.97656e-05	67	56	68	531	1018	477	none	hypothetical protein
COO91_03847	2.44558	6.23833	207.108	6.01795e-11	3.04642e-09	133	164	106	1416	1203	1694	none	Protein of unknown function DUF4360
COO91_07767	2.44437	3.20084	69.3864	2.10618e-07	3.34761e-06	17	20	19	193	217	187	none	IS4 transposase
COO91_09475	2.44397	3.54766	96.61	2.00394e-08	4.54731e-07	15	25	14	169	229	173	none	Site-specific DNA-cytosine methylase
COO91_03845	2.44242	4.98164	110.306	1.35824e-08	3.25256e-07	76	56	55	555	876	543	none	putative secreted protein
COO91_10128	2.44049	6.05549	344.066	1.0327e-12	1.0748e-10	207	179	185	2126	1944	2036	none	Formylglycine-generating enzyme%2C required for sulfatase activity%2C containings SUMF1/FGE domain
COO91_02618	2.41301	5.8513	78.0565	7.23944e-07	9.55607e-06	72	46	89	650	949	552	none	Protoporphyrinogen oxidase
COO91_01079	2.40338	3.0602	88.8426	3.67839e-08	7.52645e-07	16	23	13	127	187	224	none	Cell division ATPase FtsA
COO91_08540	2.39837	1.44605	12.2988	0.00270504	0.0103461	2	1	0	9	13	11	none	PEP-CTERM protein-sorting domain
COO91_04063	2.36367	1.22313	27.8728	6.14499e-05	0.000428842	6	4	5	72	26	58	none	hypothetical protein
COO91_10576	2.35552	-0.447514	6.75191	0.0187468	0.0499054	1	1	1	5	12	15	none	Essential recombination function protein
COO91_03777	2.34363	-0.343057	9.31824	0.00720332	0.0231118	0	2	1	12	6	14	none	hypothetical protein
COO91_00653	2.34358	0.561676	13.2246	0.00204211	0.00821703	3	4	1	14	44	22	none	23S rRNA-intervening sequence protein
COO91_08385	2.33992	0.754775	12.8941	0.00225518	0.00888639	0	0	7	26	20	26	none	hypothetical protein
COO91_08333	2.32542	-0.290896	15.5232	0.0010572	0.00476798	2	1	2	13	19	19	none	hypothetical protein
COO91_01228	2.3198	4.42317	143.611	1.03494e-09	3.45746e-08	56	62	70	594	650	594	none	Acyl-CoA synthetase
COO91_04200	2.31638	4.45355	187.769	1.29991e-10	5.65745e-09	35	44	47	378	409	444	none	ABC-type bacteriocin/lantibiotic exporters%2C containing an N-terminal double-glycine peptidase domain
COO91_06965	2.31496	5.89646	177.242	2.0397e-10	8.39459e-09	145	150	173	1370	1812	1354	none	hypothetical protein
COO91_09101	2.31466	0.0175072	12.8672	0.00227354	0.00894865	1	3	1	14	10	27	none	hypothetical protein
COO91_11149	2.3111	1.69901	34.805	1.75336e-05	0.000146438	7	8	9	80	82	73	parB	chromosome partitioning protein, ParB family
COO91_03038	2.30968	-0.308654	11.7243	0.00323713	0.011979	0	2	1	9	10	12	none	hypothetical protein
COO91_01935	2.30432	3.45312	64.9611	3.62236e-07	5.34904e-06	35	32	17	244	354	206	none	Transposase InsO
COO91_09702	2.29342	0.742992	10.6426	0.00459154	0.0159803	2	0	1	16	6	9	none	hypothetical protein
COO91_10209	2.29033	0.084111	17.1546	0.00068299	0.00328564	2	4	1	16	32	20	none	putative transposase YbfD/YdcC associated with H repeats
COO91_10658	2.28967	0.154747	12.0979	0.00287898	0.0108616	1	2	1	13	16	11	none	hypothetical protein
COO91_00710	2.28822	5.1951	117.832	7.35128e-09	1.91275e-07	131	110	124	911	1522	1029	E2.4.1.187	N-acetylglucosaminyldiphosphoundecaprenol N-acetyl-beta-D-mannosaminyltransferase [EC:2.4.1.187]
COO91_10422	2.28639	-0.317643	10.0618	0.0055762	0.0187618	3	1	0	9	16	15	none	hypothetical protein
COO91_11160	2.2676	1.01753	18.4884	0.000485798	0.00247448	1	7	3	36	36	33	none	hypothetical protein
COO91_03964	2.26299	0.925812	24.5659	0.00012027	0.000753673	2	5	1	24	23	30	none	hypothetical protein
COO91_09505	2.25127	0.0928101	10.0094	0.00567625	0.0190452	2	1	1	8	16	15	none	Essential recombination function protein
COO91_01328	2.25009	0.780709	15.7494	0.000993675	0.00453247	4	5	0	31	22	33	yagT	xanthine dehydrogenase YagT iron-sulfur-binding subunit
COO91_10131	2.24777	3.50023	91.4523	2.98477e-08	6.27323e-07	27	27	27	246	175	344	copB	Cu2+-exporting ATPase [EC:3.6.3.4]
COO91_11244	2.24604	-0.070693	11.6585	0.00330526	0.0121853	0	2	2	14	12	13	none	Methyl-accepting chemotaxis protein
COO91_02617	2.24364	3.15273	53.7411	1.17835e-06	1.43469e-05	7	5	8	67	49	73	none	Glycosyltransferase involved in cell wall bisynthesis
COO91_00858	2.23967	-0.288033	8.91637	0.00830237	0.0259575	2	3	0	11	15	22	none	Multidrug efflux pump subunit AcrA
COO91_07201	2.23463	0.207945	14.63	0.00135681	0.00587211	1	1	4	22	9	27	none	hypothetical protein
COO91_06229	2.23147	3.83609	117.606	4.68834e-09	1.30501e-07	38	32	30	318	320	284	none	Nucleotide-binding universal stress protein%2C UspA family
COO91_02437	2.2307	7.58999	235.201	2.19782e-11	1.329e-09	426	416	485	3603	4686	3873	none	Sugar transferase involved in LPS biosynthesis
COO91_03715	2.22789	5.35688	198.309	8.46976e-11	3.97894e-09	92	86	106	830	946	831	spoIID	stage II sporulation protein D
COO91_03849	2.22551	8.10776	122.428	2.99088e-08	6.27389e-07	769	610	560	5081	7337	5235	none	putative secreted protein
COO91_01148	2.2252	0.749392	19.8281	0.000349752	0.00187134	3	4	2	17	42	24	none	hypothetical protein
COO91_05921	2.22217	5.91756	124.74	6.93888e-09	1.81856e-07	205	199	188	1549	2286	1522	none	Methylase of polypeptide chain release factors
COO91_04607	2.2219	3.29668	27.5558	0.000168266	0.000999623	29	36	23	199	440	144	none	Beta-glucanase%2C GH16 family
COO91_01220	2.21859	0.511084	11.7091	0.00325268	0.0120242	3	1	4	25	25	25	none	Non-ribosomal peptide synthetase component F
COO91_08544	2.21818	2.75485	82.1095	6.46642e-08	1.22151e-06	20	23	15	179	163	189	ABC-2.TX	HlyD family secretion protein
COO91_00399	2.20897	0.674862	17.7882	0.000579909	0.00287405	5	2	4	39	43	19	none	putative DNA-binding transcriptional regulator YafY%2C containings an HTH and WYL domains
COO91_09413	2.20265	3.56591	60.0057	7.08029e-07	9.36883e-06	40	37	19	262	375	219	none	Transposase InsO
COO91_01530	2.20118	5.51808	154.812	5.81693e-10	2.08485e-08	58	81	41	530	559	522	none	peptidase domain protein
COO91_11145	2.19282	-0.350166	8.68224	0.00902954	0.0277029	1	3	0	9	19	9	ABC.CD.P	putative ABC transport system permease protein
COO91_01099	2.18113	3.8432	93.6965	2.50395e-08	5.49752e-07	58	47	50	422	591	354	none	hypothetical protein
COO91_03708	2.17783	7.1202	217.609	4.0719e-11	2.26022e-09	342	258	381	3168	2540	3109	none	Membrane protein involved in the export of O-antigen and teichoic acid
COO91_09430	2.1666	5.24315	63.826	2.11628e-06	2.37867e-05	133	131	142	933	1740	836	none	hypothetical protein
COO91_08582	2.15548	5.18795	86.282	1.24916e-07	2.13264e-06	132	98	101	846	1277	741	none	protein of unknown function DUF4397
COO91_09183	2.15503	0.940205	14.8284	0.00128283	0.00560343	5	3	2	29	43	16	none	putative DNA-binding transcriptional regulator AlpA
COO91_03479	2.15205	0.306689	17.9378	0.000558198	0.00278687	4	3	2	28	28	24	none	hypothetical protein
COO91_05926	2.14928	-0.0284452	9.15302	0.00763396	0.0242033	2	2	3	14	28	20	none	hypothetical protein
COO91_02024	2.14477	-0.027662	7.2776	0.0152539	0.0422812	1	1	3	14	16	15	none	hypothetical protein
COO91_07936	2.14254	-0.246308	8.82202	0.00858713	0.0266288	1	3	0	9	14	13	none	3-hydroxyisobutyrate dehydrogenase or related beta-hydroxyacid dehydrogenase
COO91_06485	2.13426	-0.780032	7.00315	0.0169752	0.0460615	1	0	1	8	4	7	none	Helix-turn-helix domain
COO91_10129	2.12646	1.60046	31.5188	3.10421e-05	0.00024	7	12	4	66	40	94	none	protein of unknown function nitrogen fixation
COO91_10448	2.12354	1.68613	29.488	4.5097e-05	0.000330936	9	2	9	66	42	67	none	Chromosome partitioning ATPase%2C Mrp family%2C containings Fe-S cluster
COO91_10971	2.11289	3.71369	66.9837	2.91258e-07	4.44025e-06	36	31	63	304	359	448	none	Polysaccharide pyruvyl transferase family protein WcaK
COO91_08006	2.11275	0.498273	8.1475	0.0112304	0.032889	0	7	0	20	26	14	none	hypothetical protein
COO91_09971	2.11148	0.0884006	11.3272	0.00367369	0.0133392	1	3	1	14	12	18	xerD	integrase/recombinase XerD
COO91_10972	2.10842	3.47715	94.7756	2.30408e-08	5.10007e-07	27	32	43	292	251	326	none	Membrane protein involved in the export of O-antigen and teichoic acid
COO91_07384	2.10396	6.61417	169.751	2.85375e-10	1.12733e-08	329	378	254	2477	3172	2352	lrtA	light-repressed protein
COO91_02152	2.07402	2.95624	64.4458	3.49651e-07	5.20581e-06	13	13	19	111	148	112	none	SAM-dependent methyltransferase
COO91_09629	2.07191	2.55214	29.0495	6.63188e-05	0.000456348	16	8	25	133	183	87	none	Transposase
COO91_03707	2.05952	6.6163	227.045	2.90895e-11	1.68377e-09	231	197	279	1943	1858	2019	E2.4.1.187	N-acetylglucosaminyldiphosphoundecaprenol N-acetyl-beta-D-mannosaminyltransferase [EC:2.4.1.187]
COO91_00343	2.05696	2.72553	46.8788	2.84638e-06	3.0595e-05	16	18	19	142	142	150	none	cAMP-binding domain of CRP or a regulatory subunit of cAMP-dependent protein kinases
COO91_07385	2.0489	5.26033	59.4638	2.86121e-06	3.06762e-05	146	149	104	977	1506	693	none	hypothetical protein
COO91_01277	2.04839	0.640379	9.76715	0.00616542	0.0203521	2	2	0	15	10	9	none	Dephospho-CoA kinase
COO91_07396	2.04475	3.12581	40.5313	7.04917e-06	6.69301e-05	8	14	20	122	105	115	none	hypothetical protein
COO91_10423	2.03994	0.679024	19.432	0.00038491	0.00202442	7	2	3	24	40	34	none	hypothetical protein
COO91_09329	2.03966	0.640806	16.6958	0.000770487	0.00364181	3	2	2	18	19	21	none	Mobile element protein
COO91_10934	2.03758	2.4296	28.7595	6.29977e-05	0.000437668	16	11	20	90	193	91	none	hypothetical protein
COO91_09990	2.03526	2.44875	21.6766	0.000265623	0.00148664	10	10	6	52	114	40	none	Archaeal DNA helicase HerA or a related bacterial ATPase%2C containings HAS-barrel and ATPase domains
COO91_00162	2.02935	3.85982	68.3344	2.34034e-07	3.65012e-06	42	23	23	186	250	271	none	Cellulose biosynthesis protein BcsQ
COO91_06731	2.01893	3.90429	43.5726	7.46482e-06	7.05054e-05	22	28	33	153	321	175	none	Sugar transferase involved in LPS biosynthesis
COO91_03667	2.01685	0.197312	7.12745	0.0161696	0.0442977	3	0	1	8	17	8	none	Zn-dependent protease
COO91_10894	2.01384	0.046884	13.5151	0.00187344	0.00766657	1	2	3	20	16	13	none	hypothetical protein
COO91_09363	2.01224	0.195644	9.20885	0.00748527	0.0238086	3	0	5	22	23	20	none	hypothetical protein
COO91_01237	2.01198	0.693178	21.3195	0.000246205	0.00139671	3	5	6	30	38	44	cpcC	phycocyanin-associated rod linker protein
COO91_08370	2.00652	3.30779	52.9294	1.30181e-06	1.56391e-05	36	21	28	172	295	199	none	ATPase components of ABC transporters with duplicated ATPase domains
COO91_07772	2.00421	0.685973	14.8844	0.00126276	0.00553142	6	3	2	27	43	17	none	hypothetical protein
COO91_01936	2.0026	0.504087	10.101	0.00550266	0.0185663	4	1	4	26	30	16	none	CopG-like ribbon-helix-helix domain
COO91_03431	1.99697	0.890451	29.3527	4.62612e-05	0.000337875	5	7	3	52	34	33	none	hypothetical protein
COO91_05365	1.98713	1.69825	32.4408	2.63412e-05	0.00020766	6	8	6	49	59	48	none	Protein N-acetyltransferase%2C RimJ/RimL family
COO91_09987	1.98567	2.95971	39.3642	8.4216e-06	7.81109e-05	10	17	6	77	109	68	none	hypothetical protein
COO91_04772	1.9807	4.61006	159.414	4.64126e-10	1.72004e-08	59	60	81	512	480	565	none	Esterase/lipase
COO91_00940	1.97597	-0.100146	6.75334	0.0187361	0.0498893	2	1	1	7	16	9	ABC.PE.S	peptide/nickel transport system substrate-binding protein
COO91_00185	1.97395	1.59993	27.6878	6.37127e-05	0.000440938	6	11	5	59	47	65	none	PEP-CTERM protein-sorting domain
COO91_05925	1.97116	2.85167	32.1116	4.15823e-05	0.000308969	39	20	24	172	282	181	none	hypothetical protein
COO91_03663	1.96613	5.51235	88.5231	7.16173e-08	1.32059e-06	112	122	174	937	1263	907	none	hypothetical protein
COO91_03846	1.96239	4.08117	75.7057	1.14778e-07	1.98777e-06	31	45	32	233	298	289	none	hypothetical protein
COO91_08334	1.95082	2.66291	32.7375	2.84834e-05	0.000221854	22	23	17	97	214	153	none	Panthothenate kinase
COO91_09274	1.94797	-0.112936	10.3692	0.00502827	0.0172443	0	2	4	16	12	19	none	hypothetical protein
COO91_10730	1.9427	0.445769	9.00963	0.00803138	0.0253371	4	2	1	19	21	14	none	DNA-binding response regulator%2C NarL/FixJ family%2C containings REC and HTH domains
COO91_07248	1.93953	2.90603	55.932	9.0561e-07	1.15051e-05	20	17	17	108	115	187	dcd	dCTP deaminase [EC:3.5.4.13]
COO91_07750	1.93944	2.38981	51.2771	1.60048e-06	1.87484e-05	11	10	7	64	58	91	none	hypothetical protein
COO91_10844	1.93882	1.39858	23.0159	0.000168028	0.000998754	3	7	9	48	48	48	none	Prokaryotic membrane lipoprotein lipid attachment site profile
COO91_02176	1.93753	0.680712	7.61449	0.0143943	0.0402754	5	3	3	17	54	11	none	hypothetical protein
COO91_10939	1.93507	0.550056	7.74744	0.0130472	0.0372619	4	4	1	12	19	38	none	hypothetical protein
COO91_09894	1.93489	2.60494	28.2868	6.97526e-05	0.000477245	21	13	22	101	213	101	none	hypothetical protein
COO91_04239	1.93267	2.31817	42.8085	5.03422e-06	5.0736e-05	13	16	15	123	113	94	none	hypothetical protein
COO91_09809	1.93232	0.190947	12.0937	0.0028828	0.0108647	2	5	2	17	28	23	none	Site-specific DNA-cytosine methylase
COO91_01801	1.93071	4.69596	112.442	6.55349e-09	1.73435e-07	56	53	61	397	465	407	ABCB-BAC	ATP-binding cassette, subfamily B, bacterial
COO91_08202	1.92475	0.560403	16.6209	0.000785927	0.0037067	7	2	3	36	31	24	none	Dimeric alpha-beta barrel
COO91_09528	1.92038	6.81861	220.687	3.64354e-11	2.05405e-09	402	315	355	2638	2662	2695	none	Transposase
COO91_08453	1.91594	0.531795	14.6376	0.00135391	0.00586895	4	3	2	24	22	22	none	Arc-type ribbon-helix-helix
COO91_09635	1.91477	0.0378694	12.3829	0.00263571	0.0101671	2	4	1	14	16	23	none	hypothetical protein
COO91_05080	1.91414	-0.209239	7.18281	0.015825	0.043574	1	1	2	11	9	11	none	hypothetical protein
COO91_04199	1.90544	6.72844	253.471	1.21066e-11	8.40013e-10	224	290	219	1806	1786	1767	none	hypothetical protein
COO91_00817	1.90237	2.3677	38.2626	9.99647e-06	9.05433e-05	15	17	15	145	73	132	none	Superfamily II DNA or RNA helicase
COO91_02272	1.90232	4.6707	100.26	1.52811e-08	3.6193e-07	33	35	30	299	169	259	none	PEP-CTERM protein-sorting domain
COO91_07200	1.89937	0.787537	19.9803	0.000337206	0.00181288	5	3	3	30	26	26	none	hypothetical protein
COO91_08007	1.89849	0.851686	16.1057	0.000902086	0.0041656	3	3	6	22	44	22	none	hypothetical protein
COO91_09857	1.89823	-0.531182	7.61467	0.0134048	0.0380132	3	1	1	19	12	7	none	IS4 transposase
COO91_01238	1.89388	0.971723	22.374	0.000193761	0.00113121	6	4	5	33	46	31	cpeS	phycoerythrin-associated linker protein
COO91_06810	1.89369	2.52646	32.2758	2.71485e-05	0.000213558	27	15	12	107	149	138	none	DNA-binding response regulator%2C OmpR family%2C containings REC and winged-helix
COO91_08045	1.88996	0.630189	15.3843	0.00109848	0.00492541	8	4	2	22	48	32	none	hypothetical protein
COO91_09995	1.88781	2.21792	24.6751	0.000134844	0.000825511	16	20	15	73	199	90	none	Transposase%2C IS4
COO91_07114	1.88205	0.349402	11.1492	0.00389075	0.0139832	4	1	2	15	18	19	none	hypothetical protein
COO91_07546	1.88126	0.829764	11.5778	0.00339098	0.0124589	5	1	7	17	40	38	E2.4.1.187	N-acetylglucosaminyldiphosphoundecaprenol N-acetyl-beta-D-mannosaminyltransferase [EC:2.4.1.187]
COO91_00956	1.87821	1.1399	7.82757	0.0138985	0.039207	5	9	0	41	41	19	none	DNA-binding transcriptional regulator%2C AcrR family
COO91_02666	1.87078	7.44121	179.05	1.88459e-10	7.78579e-09	394	341	471	2900	2934	2856	rfbB	dTDP-glucose 4-6-dehydratase
COO91_07172	1.85963	0.198469	7.34264	0.0148756	0.041445	2	1	4	8	20	23	amt	ammonium transporter, Amt family
COO91_01189	1.85844	1.56588	18.22	0.000527593	0.00265489	15	6	6	50	85	57	metQ	D-methionine transport system substrate-binding protein
COO91_11165	1.8565	1.93918	22.0827	0.000211465	0.00122729	11	9	15	59	126	61	none	hypothetical protein
COO91_01376	1.85379	3.19788	10.6167	0.00463109	0.0161024	3	3	0	16	9	19	none	Protein of unknown function DUF3102
COO91_10388	1.84643	2.01212	25.5065	9.88091e-05	0.000635478	12	12	5	92	41	75	none	Actin-related protein
COO91_04268	1.84542	4.64337	182.817	1.60198e-10	6.79991e-09	59	71	54	456	396	446	none	Multidrug efflux pump subunit AcrB
COO91_10767	1.84404	1.9389	26.8393	7.53655e-05	0.000508576	8	10	15	84	45	108	-	putative transposase
COO91_08752	1.84142	1.67346	32.613	2.55546e-05	0.000202491	6	7	7	61	33	49	none	hypothetical protein
COO91_10845	1.84046	-0.0821111	7.66394	0.0131564	0.0374235	2	4	0	10	17	16	none	AAA+-type ATPase%2C SpoVK/Ycf46/Vps4 family
COO91_11164	1.83613	1.79659	30.2558	3.90818e-05	0.000292546	12	8	6	48	55	81	none	hypothetical protein
COO91_03664	1.83418	7.13029	343.39	1.04929e-12	1.08167e-10	399	457	453	3115	2834	3223	none	Carbonic anhydrase or acetyltransferase%2C isoleucine patch superfamily
COO91_10429	1.83122	5.56104	171.4	2.64732e-10	1.07321e-08	132	130	142	887	1047	876	none	ATPase involved in DNA repair
COO91_06676	1.82805	7.92054	93.836	1.04755e-07	1.83481e-06	923	787	1011	5773	7799	5276	none	Myosin heavy chain
COO91_08107	1.8264	1.66795	16.9513	0.000720295	0.00343608	4	2	3	16	20	28	none	hypothetical protein
COO91_08687	1.82283	1.80738	27.3752	6.77541e-05	0.000465632	9	12	7	83	33	82	none	Transposase
COO91_08180	1.82084	2.88534	7.82798	0.0123664	0.0356944	0	2	1	7	7	8	none	Tetratricopeptide
COO91_09414	1.81485	0.625977	8.66121	0.00913399	0.0279283	5	1	5	28	32	17	none	CopG-like ribbon-helix-helix domain
COO91_00405	1.8126	-0.0435624	7.51399	0.013929	0.0392829	3	3	0	11	21	10	cas1	CRISP-associated protein Cas1
COO91_07620	1.80958	5.55774	81.0796	1.13781e-07	1.97683e-06	154	200	176	1053	1545	990	none	hypothetical protein
COO91_08483	1.80953	1.89745	24.9215	0.000111597	0.000708459	15	6	13	79	101	54	none	Protein of unknown function DUF192
COO91_03871	1.80664	3.51069	79.0289	8.48079e-08	1.53505e-06	38	30	37	230	262	229	none	Tetratricopeptide
COO91_01931	1.80481	2.17632	24.1744	0.00013104	0.000809577	12	19	11	84	101	102	none	hypothetical protein
COO91_02917	1.79603	2.48355	38.5638	9.53535e-06	8.69339e-05	23	13	18	120	137	112	none	Mannosyltransferase related to Gpi18
COO91_08106	1.79298	-0.246967	11.518	0.00345613	0.0126635	2	3	1	16	12	14	none	hypothetical protein
COO91_11148	1.79022	1.89624	27.3426	6.81911e-05	0.000467744	13	8	13	101	44	91	parA	chromosome partitioning protein
COO91_01510	1.78953	5.08246	104.095	1.15986e-08	2.85325e-07	61	75	91	557	448	543	cpcE	phycocyanin alpha subunit phycocyanobilin lyase, CpcE subunit
COO91_05922	1.78807	6.44986	181.132	1.72207e-10	7.21841e-09	360	373	311	2398	2419	2236	none	Amino acid transporter
COO91_08484	1.78746	1.01445	25.8335	9.23805e-05	0.000599476	8	5	6	42	44	44	none	Type IV secretory pathway%2C VirB4 component
COO91_09720	1.78695	3.62088	80.0987	7.71099e-08	1.41464e-06	60	53	40	354	331	353	none	hypothetical protein
COO91_09855	1.76621	2.98652	47.972	2.45776e-06	2.70629e-05	30	19	37	215	195	168	none	IS4 transposase
COO91_00774	1.76098	3.40209	13.278	0.00391048	0.0140295	66	23	60	193	550	234	scyB	leucine dehydrogenase [EC:1.4.1.9]
COO91_01340	1.75775	1.37941	27.5591	6.53428e-05	0.000450491	4	7	7	38	32	51	none	hypothetical protein
COO91_01513	1.75393	5.71689	57.2421	2.85641e-06	3.06724e-05	180	267	191	1161	1891	1074	cpcC_3	phycocyanin-associated rod linker protein
COO91_01191	1.75273	1.02773	11.2347	0.0037864	0.0136716	0	8	9	48	38	27	none	SAM-dependent methyltransferase
COO91_08162	1.75217	1.9576	26.1016	8.74592e-05	0.000573038	9	11	13	72	94	51	none	hypothetical protein
COO91_07123	1.73945	5.39302	40.8617	2.22939e-05	0.000180351	127	66	89	517	809	513	penP	beta-lactamase class A [EC:3.5.2.6]
COO91_09484	1.73124	1.72729	19.2847	0.000398983	0.00209133	5	15	12	59	83	65	none	putative oxidoreductase
COO91_10851	1.72959	0.323741	7.10731	0.0163873	0.0447243	6	0	5	15	39	18	none	Methyl-accepting chemotaxis protein
COO91_00342	1.72433	0.381829	15.1891	0.0011596	0.00515307	4	2	5	19	19	35	none	Conserved hypothetical protein CHP02058
COO91_00921	1.72335	0.821668	10.3322	0.00509082	0.0174163	5	1	6	24	16	40	none	Ribosomal protein S18 acetylase RimI and related acetyltransferases
COO91_04592	1.72246	5.19093	122.208	3.51622e-09	1.00157e-07	121	173	117	1031	836	782	none	hypothetical protein
COO91_00161	1.72241	3.5668	55.3878	9.66071e-07	1.21167e-05	30	29	36	165	263	182	none	Chromosome segregation protein Spo0J%2C containings ParB-like nuclease domain
COO91_01100	1.71433	3.85665	74.7789	1.2513e-07	2.13292e-06	59	58	64	430	398	338	ABC.SN.S	NitT/TauT family transport system substrate-binding protein
COO91_01205	1.71142	0.43581	9.75862	0.00618351	0.0204056	3	4	3	23	25	17	GST	glutathione S-transferase [EC:2.5.1.18]
COO91_00045	1.70093	4.79848	69.9369	1.99417e-07	3.19304e-06	79	96	103	552	716	488	parA	chromosome partitioning protein
COO91_06116	1.70044	2.94724	47.5994	2.58313e-06	2.81852e-05	16	26	22	163	104	144	none	Tetratricopeptide
COO91_10123	1.69813	0.679349	10.6745	0.00454343	0.0158384	3	8	2	34	19	31	none	putative membrane protein
COO91_00638	1.6938	0.943956	17.1439	0.0006849	0.0032919	5	5	6	42	30	31	none	putative acetyltransferase%2C GNAT family
COO91_02023	1.69339	-0.0810195	7.78528	0.0125667	0.0361858	1	2	4	21	8	17	none	hypothetical protein
COO91_00719	1.68781	2.4937	33.2622	2.28164e-05	0.00018349	15	18	28	96	164	123	cst2	CRISPR-associated protein Cst2
COO91_08264	1.67337	2.97209	28.1969	6.7883e-05	0.000466222	42	41	14	195	212	197	none	hypothetical protein
COO91_09602	1.67271	1.76223	24.3436	0.000126076	0.000783381	6	8	13	71	46	54	none	hypothetical protein
COO91_01512	1.67064	4.42365	79.4627	8.15875e-08	1.48921e-06	54	100	67	443	464	461	cpcC	phycobilisome rod linker polypeptide Lr, phycocyanin-associated
COO91_08475	1.66528	0.808336	13.8769	0.00168481	0.00701938	5	7	4	29	25	47	none	hypothetical protein
COO91_09819	1.66148	1.03126	15.9335	0.000945097	0.00434568	4	5	3	20	30	25	none	hypothetical protein
COO91_10612	1.66064	2.40975	35.7993	1.48598e-05	0.000126964	23	19	14	100	146	99	none	Transposase
COO91_03155	1.65988	4.462	50.9223	2.09564e-06	2.35793e-05	80	86	83	501	627	401	topA	DNA topoisomerase I [EC:5.99.1.2]
COO91_00485	1.65945	3.09544	20.1657	0.000523991	0.00264168	45	21	36	145	304	178	cynT_1	carbonic anhydrase [EC:4.2.1.1]
COO91_10572	1.65912	-0.335408	8.33431	0.0102473	0.0305639	3	1	1	10	12	10	none	hypothetical protein
COO91_10680	1.65719	3.20497	46.5914	2.95965e-06	3.1593e-05	16	25	18	168	99	100	none	hypothetical protein
COO91_10456	1.65482	1.62708	14.4534	0.00142677	0.00611617	6	12	7	39	70	44	none	Methyl-accepting chemotaxis protein
COO91_02463	1.65419	2.83571	36.5528	1.31366e-05	0.000114393	29	29	12	137	131	165	rihA	pyrimidine-specific ribonucleoside hydrolase [EC:3.2.-.-]
COO91_10420	1.65237	1.6439	25.2729	0.000103707	0.000663825	11	9	10	51	53	83	none	hypothetical protein
COO91_08762	1.65017	-0.22821	9.98125	0.00573071	0.01921	3	2	2	12	17	15	none	Transposase
COO91_06407	1.64378	4.45618	25.7752	0.000226374	0.00130399	75	67	111	400	774	353	none	Glycosyltransferase involved in cell wall bisynthesis
COO91_01264	1.64305	1.98227	24.4315	0.000123745	0.000771109	11	6	11	52	70	50	none	Fatty acid desaturase
COO91_01223	1.64302	1.82213	16.4608	0.00083477	0.00391319	15	12	8	50	85	79	none	Non-ribosomal peptide synthetase component F
COO91_10624	1.64111	3.62035	67.8336	2.46193e-07	3.82323e-06	44	39	38	205	261	274	none	ATPase involved in DNA repair
COO91_10613	1.63895	2.64473	29.4702	4.52487e-05	0.000331824	31	22	18	121	202	106	none	Transposase
COO91_11060	1.63783	1.82935	17.0711	0.000698037	0.00334317	4	7	23	66	72	71	SIG2	RNA polymerase nonessential primary-like sigma factor
COO91_09116	1.63567	2.53758	27.6529	6.41503e-05	0.000443399	20	21	26	89	195	119	none	hypothetical protein
COO91_06405	1.63448	2.94578	32.8732	2.44149e-05	0.000195031	20	28	27	108	147	202	none	Glycosyltransferase involved in cell wall bisynthesis
COO91_02971	1.63437	1.17871	13.7145	0.0017667	0.00729806	7	4	7	37	36	38	pilG	twitching motility two-component system response regulator PilG
COO91_03837	1.6307	6.43909	115.371	5.41082e-09	1.49025e-07	281	384	295	1726	2165	1875	chlP	geranylgeranyl reductase [EC:1.3.1.83]
COO91_01952	1.62878	4.59372	96.9957	1.94655e-08	4.4504e-07	93	65	61	453	408	477	none	Cytochrome P450
COO91_09974	1.626	1.38897	13.1349	0.0020976	0.00837803	6	16	2	37	57	50	none	hypothetical protein
COO91_03885	1.62488	2.01356	18.6967	0.000461206	0.00236704	15	12	11	37	106	85	none	hypothetical protein
COO91_07115	1.62435	4.84047	127.988	2.48272e-09	7.24337e-08	128	123	100	726	665	736	PTS-Fru-EIIA	PTS system, fructose-specific IIA component [EC:2.7.1.202]
COO91_10857	1.62334	1.42008	13.8618	0.00169224	0.00704493	1	8	11	39	35	48	none	Murein DD-endopeptidase MepM and murein hydrolase activator NlpD%2C containing LysM domain
COO91_10446	1.6228	2.84873	41.8624	5.78051e-06	5.65717e-05	24	22	22	151	146	114	none	DNA-binding response regulator%2C NarL/FixJ family%2C containings REC and HTH domains
COO91_11132	1.62059	1.03853	10.8251	0.00432383	0.0152348	2	11	3	48	16	34	none	Protein of unknown function DUF1392
COO91_07210	1.61552	5.18171	86.7176	4.37761e-08	8.74231e-07	75	94	100	579	444	604	none	hypothetical protein
COO91_04776	1.61199	5.4044	117.827	4.62317e-09	1.29305e-07	170	143	142	894	987	844	none	NAD/NADP transhydrogenase beta subunit
COO91_01224	1.61112	2.15492	27.7241	6.32622e-05	0.000439224	12	8	17	83	70	71	none	hypothetical protein
COO91_09427	1.60854	2.56965	41.2285	6.34973e-06	6.12017e-05	13	21	26	125	104	132	none	Amino acid transporter
COO91_10153	1.60473	0.141881	7.22579	0.0155631	0.0429841	3	1	1	14	8	9	none	hypothetical protein
COO91_08147	1.6035	3.41088	54.788	1.03799e-06	1.28992e-05	37	48	37	203	304	211	none	IS4 transposase
COO91_09594	1.60261	1.73031	20.283	0.000313735	0.00170561	17	9	6	72	54	67	none	Flagellar biosynthesis GTPase FlhF
COO91_01996	1.60007	0.597954	7.27294	0.0152814	0.0423249	5	1	3	23	14	18	SLC14A	solute carrier family 14 (urea transporter)
COO91_08718	1.5991	5.79622	139.728	1.27573e-09	4.15918e-08	189	211	175	1212	1115	1085	none	Multidrug efflux pump subunit AcrA
COO91_10217	1.59272	3.86187	58.7064	6.56281e-07	8.75905e-06	47	30	30	213	221	201	none	hypothetical protein
COO91_10256	1.59142	1.13389	19.6136	0.000368325	0.00195047	6	6	7	32	41	40	none	Outer membrane protein OmpA and related peptidoglycan-associated
COO91_10898	1.58861	3.97923	62.3805	4.36225e-07	6.27885e-06	53	60	48	264	317	367	none	Fatty acid desaturase
COO91_09761	1.58674	3.06245	25.662	0.000115397	0.00072865	48	45	16	207	227	205	none	hypothetical protein
COO91_01159	1.58612	1.61644	26.2032	8.5672e-05	0.000563032	8	9	9	51	51	52	none	putative nuclease of restriction endonuclease-like
COO91_08043	1.58605	2.8118	28.1184	5.85817e-05	0.000412818	22	12	22	85	123	123	none	DNA segregation ATPase FtsK/SpoIIIE
COO91_04234	1.58498	2.90227	29.8553	4.20991e-05	0.000312324	33	19	11	102	137	132	none	DNA-binding response regulator%2C OmpR family%2C containings REC and winged-helix
COO91_09230	1.58437	2.20678	22.1488	0.000203813	0.00118542	8	22	12	68	112	63	none	hypothetical protein
COO91_01263	1.58065	1.19335	13.5973	0.00182858	0.00750285	8	8	1	27	38	35	none	hypothetical protein
COO91_04265	1.58062	2.52356	34.8906	1.72835e-05	0.000144796	16	14	15	100	60	108	none	hypothetical protein
COO91_08499	1.58012	1.52238	21.6244	0.000229564	0.0013196	11	8	14	68	76	50	none	Tetratricopeptide
COO91_06404	1.57954	4.09189	46.9109	2.84e-06	3.05568e-05	45	71	86	289	479	404	none	Ubiqui/menaqui biosynthesis C-methylase UbiE
COO91_03153	1.57879	5.46978	11.0821	0.00776961	0.0245829	268	145	187	782	2056	597	none	hypothetical protein
COO91_10471	1.57836	1.68721	32.8292	2.46038e-05	0.000196183	12	11	10	63	67	64	none	Prokaryotic membrane lipoprotein lipid attachment site profile
COO91_06532	1.57769	4.31795	41.1033	6.47784e-06	6.21597e-05	48	31	23	226	140	240	none	Secreted protein containing bacterial Ig-like domain and vWFA domain
COO91_05027	1.57708	0.280499	7.00005	0.0169958	0.0460829	0	4	4	14	10	24	none	Type I site-specific restriction endonuclease%2C part of a restriction-modification system
COO91_02433	1.57603	8.97152	127.509	2.554e-09	7.43131e-08	2058	1863	2246	11041	13857	11058	none	Chromosome partitioning ATPase%2C Mrp family%2C containings Fe-S cluster
COO91_06412	1.57125	5.85952	54.8104	2.501e-06	2.74456e-05	266	213	222	1141	1836	1062	none	Beta-phosphoglucomutase or related phosphatase%2C HAD superfamily
COO91_02970	1.57081	0.375647	9.2763	0.00730998	0.0233885	4	3	2	19	9	26	pilH	twitching motility two-component system response regulator PilH
COO91_10028	1.57047	1.12921	16.6238	0.000785328	0.00370549	8	5	8	40	48	35	none	hypothetical protein
COO91_02616	1.55971	6.18521	98.495	1.7403e-08	4.08611e-07	81	109	97	683	412	577	none	hypothetical protein
COO91_09686	1.55733	3.76021	62.671	4.2271e-07	6.11686e-06	47	58	45	247	353	256	none	IS4 transposase
COO91_03768	1.55663	0.807478	8.44443	0.00989622	0.0297823	2	11	5	36	34	34	none	Sugar transferase involved in LPS biosynthesis
COO91_08930	1.55617	6.56872	98.3508	1.75903e-08	4.12115e-07	298	309	334	2055	1362	2074	amt	ammonium transporter, Amt family
COO91_05246	1.55473	1.0503	7.95773	0.0118834	0.034549	4	7	5	25	54	12	none	CheY chemotaxis protein or a CheY-like REC
COO91_09360	1.55383	1.93561	18.8121	0.000448183	0.00231395	11	11	15	60	73	81	none	AAA+-type ATPase%2C SpoVK/Ycf46/Vps4 family
COO91_09606	1.55281	1.47679	18.33	0.000505489	0.00256513	11	13	7	56	78	43	none	hypothetical protein
COO91_10230	1.55097	3.71889	62.7699	4.18216e-07	6.05993e-06	45	57	43	239	336	249	none	IS4 transposase
COO91_00766	1.55056	4.23342	52.3614	1.3968e-06	1.67061e-05	82	78	60	424	500	330	ABC.MS.P1	multiple sugar transport system permease protein
COO91_00895	1.54997	1.02217	18.517	0.000482336	0.00245917	8	7	3	38	25	42	none	Signal transduction histidine kinase
COO91_07779	1.54754	0.780354	13.1599	0.002082	0.00833108	5	7	3	28	37	21	none	hypothetical protein
COO91_01764	1.54748	6.23152	173.22	2.43865e-10	9.92328e-09	225	284	252	1430	1338	1595	none	Flagellum-specific peptidoglycan hydrolase FlgJ
COO91_01329	1.54374	0.805947	13.1456	0.0020909	0.00836359	6	8	3	32	30	36	yagS	xanthine dehydrogenase YagS FAD-binding subunit [EC:1.17.1.4]
COO91_00775	1.54128	3.78676	12.8821	0.00412203	0.0146477	95	23	78	288	521	311	scyC	FIG00875611: hypothetical protein
COO91_08543	1.54018	2.44419	26.9204	7.4155e-05	0.000501972	14	29	19	119	119	114	ABC-2.A	ABC-2 type transport system ATP-binding protein
COO91_06900	1.5374	2.7447	41.6615	5.95448e-06	5.81166e-05	23	16	20	111	110	117	none	FdxN element excision controlling factor protein
COO91_01212	1.53725	3.42153	61.6744	4.71129e-07	6.70105e-06	38	46	30	208	244	192	none	Outer membrane protein assembly factor BamB%2C containings PQQ-like beta-propeller repeat
COO91_09023	1.53712	2.24823	19.1398	0.000413392	0.00215849	24	9	14	93	111	64	menE	O-succinylbenzoyl-CoA synthetase
COO91_09988	1.53711	3.71017	27.088	7.98725e-05	0.000531044	33	23	19	137	185	102	none	hypothetical protein
COO91_09719	1.5359	4.82755	105.331	1.06323e-08	2.64561e-07	122	158	129	808	830	672	none	Hemolysin activation/secretion protein
COO91_08541	1.53444	1.23288	16.4472	0.0008231	0.0038635	4	11	8	42	43	46	ABC-2.P	ABC-2 type transport system permease protein
COO91_06408	1.52987	3.13044	35.1907	1.64372e-05	0.00013878	44	20	43	188	205	219	none	hypothetical protein
COO91_00484	1.52871	3.12123	42.2548	5.45696e-06	5.39416e-05	33	38	27	146	217	187	ndhF3	NADH dehydrogenase subunit 5
COO91_06413	1.52521	3.32977	48.5476	2.27724e-06	2.52808e-05	29	38	40	174	191	240	none	Glycerophosphoryl diester phosphodiesterase
COO91_01953	1.52472	4.67484	111.639	6.9122e-09	1.81596e-07	78	88	79	447	427	511	none	Acyl-CoA synthetase
COO91_10312	1.52009	1.47601	22.5138	0.000187802	0.00109998	4	9	7	38	38	37	none	hypothetical protein
COO91_09777	1.51691	0.9677	17.8309	0.000573617	0.00285238	8	4	7	38	35	35	none	hypothetical protein
COO91_01763	1.51634	5.56547	107.774	8.9756e-09	2.25935e-07	172	171	171	940	983	960	E3.5.1.28B	N-acetylmuramoyl-L-alanine amidase [EC:3.5.1.28]
COO91_00781	1.51627	3.08256	19.9209	0.000342257	0.00183759	15	10	16	80	105	44	none	putative dithiol-disulfide isomerase%2C DsbA family
COO91_02357	1.51304	4.43272	56.6548	8.31749e-07	1.07177e-05	48	52	74	350	238	399	none	Tellurite resistance protein
COO91_10773	1.51188	1.62704	23.8295	0.000140744	0.00085633	7	10	8	43	40	58	none	Ca2+-binding protein%2C RTX toxin-related
COO91_03789	1.50838	1.43492	14.0291	0.00161194	0.00675743	9	6	8	48	49	32	none	hypothetical protein
COO91_01859	1.5068	1.46945	18.6209	0.000469989	0.00240641	8	15	9	53	73	51	none	hypothetical protein
COO91_09026	1.50655	2.04153	24.5227	0.000121375	0.000758721	11	11	15	59	82	65	menF	menaquinone-specific isochorismate synthase [EC:5.4.4.2]
COO91_08268	1.5052	1.69787	30.693	3.60612e-05	0.000273338	10	17	10	70	67	69	none	hypothetical protein
COO91_10309	1.50424	0.798234	15.1143	0.001184	0.00523942	4	4	9	34	28	34	none	hypothetical protein
COO91_01068	1.50138	3.51589	39.3781	8.40366e-06	7.80114e-05	61	45	33	281	299	189	none	Hemolysin activation/secretion protein
COO91_02163	1.49966	3.70443	44.9155	3.72956e-06	3.89892e-05	49	39	52	233	293	250	none	hypothetical protein
COO91_08349	1.49965	2.67808	21.1149	0.000266	0.00148716	31	18	20	91	174	115	none	Superfamily II DNA or RNA helicase
COO91_04338	1.49841	1.90214	27.3242	6.84404e-05	0.000469157	14	14	10	73	62	77	pex	Pex protein
COO91_10397	1.49818	1.43101	16.6584	0.00077815	0.00367643	10	7	7	56	34	45	none	hypothetical protein
COO91_09626	1.49798	0.959207	14.5745	0.00137839	0.00595072	5	4	8	38	23	35	none	IS4 transposase
COO91_10963	1.4978	3.21764	38.753	9.25795e-06	8.46352e-05	21	13	15	93	81	100	none	hypothetical protein
COO91_02977	1.49727	1.88465	13.2674	0.00206258	0.00828706	13	10	13	61	104	32	none	hypothetical protein
COO91_07740	1.49722	2.32388	9.05241	0.0101691	0.0303978	19	17	24	87	193	45	none	Serine protease%2C subtilisin family
COO91_10592	1.49715	1.78596	15.6293	0.00102686	0.00465831	3	3	5	22	18	22	none	hypothetical protein
COO91_00776	1.49692	3.34188	12.2633	0.00437133	0.0153821	58	15	76	228	364	236	scyD	Glucose/arabinose dehydrogenase, beta-propeller fold
COO91_00767	1.49691	4.12706	73.7501	1.37862e-07	2.32072e-06	74	74	57	380	377	377	ABC.MS.P	multiple sugar transport system permease protein
COO91_08338	1.49482	1.37631	20.4209	0.000303654	0.00166502	7	7	12	37	57	50	none	hypothetical protein
COO91_05251	1.49196	0.196082	10.4455	0.00490182	0.0168897	6	3	2	19	16	27	none	putative restriction /modification enzyme
COO91_03624	1.49051	2.00382	14.8016	0.00129535	0.00564218	6	15	17	82	46	84	czcD	cobalt-zinc-cadmium efflux system protein
COO91_00585	1.4903	-0.362023	8.43507	0.00987648	0.0297531	1	4	3	14	12	19	none	hypothetical protein
COO91_01491	1.4901	4.14682	82.4029	6.30433e-08	1.19926e-06	77	74	66	352	398	446	none	DNA primase
COO91_01207	1.48929	1.30907	11.0265	0.00404867	0.0144276	1	7	13	48	32	37	none	hypothetical protein
COO91_01135	1.48879	2.32761	30.3439	3.84512e-05	0.000289025	19	16	19	82	114	101	none	Molecular chaperone DnaK
COO91_04297	1.487	0.197451	8.19602	0.0107821	0.0318606	1	6	2	14	17	19	none	Cadmium resistance protein CadD%2C putative permease
COO91_02052	1.48697	0.57796	8.16388	0.0109109	0.0321796	2	6	2	15	27	13	none	putative autotransporter protein
COO91_01942	1.4862	2.65299	19.8428	0.000348519	0.00186566	8	10	6	49	25	60	none	DNA mismatch repair ATPase MutS
COO91_02976	1.48551	5.02856	57.7431	7.32907e-07	9.65084e-06	71	115	113	608	383	665	none	5-methylcytosine-specific restriction endonuclease McrA
COO91_00159	1.48527	4.15845	66.3415	2.86816e-07	4.3869e-06	68	81	86	401	486	396	none	Glycosyltransferase%2C GT2 family
COO91_06991	1.48433	0.928914	14.6341	0.00135525	0.00587003	4	5	9	28	42	29	E2.7.8.26	adenosylcobinamide-GDP ribazoletransferase [EC:2.7.8.26]
COO91_03675	1.48087	4.2043	39.9094	8.21618e-06	7.6402e-05	65	82	58	319	488	297	none	Lipopolysaccharide biosynthesis protein%2C LPS:glycosyltransferase
COO91_00936	1.47962	0.69961	6.93497	0.0174364	0.0469829	3	2	5	24	14	18	ABC.PE.P	peptide/nickel transport system permease protein
COO91_03665	1.47865	6.34176	57.5072	1.61977e-06	1.89539e-05	333	358	309	1734	2374	1277	none	hypothetical protein
COO91_00988	1.47509	2.7363	21.2165	0.000252126	0.0014221	15	10	28	112	82	99	none	DNA primase
COO91_07931	1.4731	0.387722	10.1258	0.00545677	0.018446	6	2	4	16	28	22	none	NAD-dependent dihydropyrimidine dehydrogenase%2C PreA subunit
COO91_05222	1.47302	3.86629	76.8477	1.03316e-07	1.82131e-06	60	53	59	321	330	286	none	Radical SAM superfamily enzyme YgiQ%2C UPF0313 family
COO91_06403	1.47163	3.97577	23.3295	0.000276722	0.00153602	83	59	55	293	520	243	none	Glycosyltransferase involved in cell wall bisynthesis
COO91_00267	1.46706	5.42238	110.183	7.61995e-09	1.97317e-07	172	175	178	904	1068	861	none	Large exoprotein involved in heme utilization or adhesion
COO91_10863	1.46495	4.2619	75.557	1.16372e-07	2.00895e-06	66	55	61	331	291	371	none	DNA-binding response regulator%2C NarL/FixJ family%2C containings REC and HTH domains
COO91_01804	1.45769	2.17819	14.5296	0.00139609	0.00600609	6	18	6	56	32	75	none	hypothetical protein
COO91_08711	1.45765	1.71342	14.7943	0.00129522	0.00564218	12	7	14	39	84	54	none	hypothetical protein
COO91_02665	1.4575	7.98637	151.311	6.93586e-10	2.43053e-08	621	639	776	3650	3511	3849	UGDH	UDPglucose 6-dehydrogenase [EC:1.1.1.22]
COO91_10221	1.45615	4.09227	54.4735	1.07808e-06	1.32755e-05	41	51	40	249	236	224	none	hypothetical protein
COO91_08263	1.45193	2.07017	30.5661	3.691e-05	0.000279106	25	13	19	104	96	109	none	hypothetical protein
COO91_09975	1.45128	2.12198	28.0676	5.91623e-05	0.000415557	18	16	20	79	124	85	none	hypothetical protein
COO91_11176	1.45	4.70256	64.1542	3.60618e-07	5.33328e-06	153	95	111	637	683	612	none	ATPase involved in DNA repair
COO91_04070	1.44963	4.09826	75.8155	1.13616e-07	1.97683e-06	64	62	52	307	315	332	none	Inosine/uridine-preferring nucleoside hydrolase domain
COO91_01236	1.44584	3.41941	24.653	0.000147609	0.00089458	54	66	34	210	388	207	cpeD	phycoerythrin-associated linker protein
COO91_09765	1.44562	1.96272	38.5597	9.54152e-06	8.69339e-05	12	19	14	87	73	81	none	hypothetical protein
COO91_06223	1.4439	0.47646	7.51062	0.0139469	0.0392925	6	5	2	12	38	19	none	hypothetical protein
COO91_06410	1.4429	4.22277	59.7337	5.84282e-07	7.9351e-06	68	70	85	412	359	425	none	Glycosyltransferase involved in cell wall bisynthesis
COO91_08465	1.44249	1.806	9.65331	0.00719122	0.0230973	10	15	15	33	127	48	none	hypothetical protein
COO91_10956	1.43861	1.11903	12.9823	0.00219598	0.00869716	6	8	2	32	23	31	none	hypothetical protein
COO91_08056	1.43674	4.20984	37.8857	1.11557e-05	9.99581e-05	54	52	86	330	392	296	none	Prokaryotic membrane lipoprotein lipid attachment site profile
COO91_01831	1.43438	0.968791	8.06053	0.011337	0.0331652	4	4	7	42	20	19	none	Protein N-acetyltransferase%2C RimJ/RimL family
COO91_01267	1.43204	2.89307	26.0722	8.79836e-05	0.000575776	23	24	13	104	130	81	gcpE	(E)-4-hydroxy-3-methylbut-2-enyl-diphosphate synthase [EC:1.17.7.1 1.17.7.3]
COO91_00178	1.43093	0.928957	9.4015	0.00699676	0.0225732	2	3	10	20	31	29	none	hypothetical protein
COO91_09905	1.42996	0.485468	11.1489	0.00389111	0.0139832	3	5	3	25	17	17	none	hypothetical protein
COO91_07186	1.42705	2.96242	41.4533	6.14101e-06	5.96681e-05	26	19	20	128	99	119	none	Isopropylmalate/homocitrate/citramalate synthases
COO91_04263	1.4267	1.41616	11.8647	0.00309698	0.0115494	2	9	3	20	27	27	none	hypothetical protein
COO91_09933	1.42496	1.76343	23.0974	0.000165041	0.000985329	9	11	9	48	43	63	none	Ca2+-binding protein%2C RTX toxin-related
COO91_00433	1.42399	1.42582	13.7135	0.0017672	0.00729806	8	13	7	56	55	36	none	hypothetical protein
COO91_07560	1.42083	0.776044	10.7376	0.00444992	0.0155877	5	5	5	26	21	33	none	hypothetical protein
COO91_08701	1.42034	1.58742	10.8898	0.00428528	0.0151334	10	7	15	46	82	39	hisC	histidinol phosphate aminotransferase
COO91_02156	1.42021	4.49387	40.0854	7.99072e-06	7.48197e-05	65	57	88	349	423	329	rfbF	glucose-1-phosphate cytidylyltransferase [EC:2.7.7.33]
COO91_01383	1.41919	5.41806	87.5864	4.07521e-08	8.22949e-07	191	176	139	937	733	1003	none	Thiaminase
COO91_11173	1.41855	1.39935	12.076	0.00289876	0.0109097	11	5	11	44	37	63	none	Site-specific recombinase XerD
COO91_07664	1.41809	3.17878	42.9805	4.91045e-06	4.95809e-05	33	35	19	156	127	175	none	Non-ribosomal peptide synthetase component F
COO91_07596	1.4172	3.9517	53.4043	1.2279e-06	1.48501e-05	57	74	65	355	335	335	urtA	periplasmic protein, ABC-type urea transport system substrate-binding protein
COO91_09619	1.41539	6.14358	72.984	1.48286e-07	2.48075e-06	248	201	298	1125	1302	1505	none	Tetratricopeptide
COO91_07202	1.41419	3.96201	56.4552	8.51445e-07	1.0927e-05	56	63	62	285	364	291	none	Calycin-like
COO91_11179	1.41269	4.50212	48.502	2.29098e-06	2.54014e-05	101	93	108	424	678	460	none	Tetratricopeptide-like helical domain
COO91_10472	1.41255	4.2148	55.0582	1.00488e-06	1.25309e-05	76	85	58	371	448	313	none	hypothetical protein
COO91_02435	1.41079	6.56247	196.023	9.27759e-11	4.27322e-09	334	372	343	1810	1675	1996	none	Glycosyltransferase%2C GT2 family
COO91_01038	1.40875	2.30377	22.8761	0.000173286	0.00102495	26	14	21	120	89	113	none	hypothetical protein
COO91_07710	1.40778	3.72761	12.8562	0.00366402	0.0133085	60	54	47	184	462	171	none	Transposase
COO91_00838	1.40777	3.73575	12.5752	0.00396026	0.0141752	60	54	47	184	462	171	none	Transposase
COO91_08494	1.40551	5.51958	138.884	1.33599e-09	4.27833e-08	158	172	159	811	791	943	none	ATPase involved in DNA repair
COO91_10253	1.40336	1.21817	17.0553	0.000700939	0.00335558	5	14	7	55	31	50	none	DNA-binding response regulator%2C OmpR family%2C containings REC and winged-helix
COO91_09620	1.40322	6.13941	33.6882	6.28951e-05	0.000437236	315	179	308	1212	1724	1227	none	Tetratricopeptide
COO91_10640	1.40278	1.43411	9.36764	0.00723114	0.0231705	14	7	9	43	84	27	none	NAD/NADP transhydrogenase beta subunit
COO91_08980	1.40165	2.1372	31.0877	3.35577e-05	0.000255794	14	20	20	86	103	90	none	Protein chlororespiratory reduction 6
COO91_01326	1.39977	0.24831	8.68116	0.00903306	0.0277058	2	3	6	17	16	25	none	NADP-dependent 3-hydroxy acid dehydrogenase YdfG
COO91_04266	1.39941	4.01273	47.3615	2.66691e-06	2.89826e-05	55	45	40	259	163	313	none	hypothetical protein
COO91_01279	1.39931	5.21037	59.4368	6.04144e-07	8.19455e-06	172	148	136	770	860	724	none	Cytochrome P450
COO91_03835	1.39623	1.52695	17.4813	0.000627479	0.00306214	7	14	6	40	50	49	none	hypothetical protein
COO91_06406	1.39477	3.65101	51.397	1.57639e-06	1.85466e-05	43	49	40	232	218	231	gmd	GDPmannose 4,6-dehydratase [EC:4.2.1.47]
COO91_08529	1.39313	1.06998	9.06723	0.00786896	0.0248682	8	6	3	26	21	42	none	2%2C4-dienoyl-CoA reductase or related NADH-dependent reductase%2C Old Yellow Enzyme
COO91_08046	1.39311	0.977421	13.9974	0.0016268	0.00680388	11	6	7	32	50	42	none	hypothetical protein
COO91_01956	1.3914	0.634188	7.2167	0.015618	0.0431042	4	2	5	10	27	20	none	hypothetical protein
COO91_10434	1.39069	2.57099	34.2984	1.91e-05	0.000157575	14	26	19	107	107	88	none	DNA primase
COO91_05729	1.39002	2.24236	17.1473	0.000684284	0.0032904	9	22	11	83	41	94	none	putative membrane protein YozV%2C TM2 domain
COO91_01791	1.38962	1.08557	11.2675	0.00374498	0.0135571	4	3	11	37	27	30	none	Conserved hypothetical protein CHP00725
COO91_09760	1.38947	2.15083	27.5044	6.60497e-05	0.000454785	28	14	21	110	103	114	none	hypothetical protein
COO91_08542	1.38458	2.18377	22.1695	0.000202863	0.00118053	14	20	12	87	72	77	ABC-2.P	ABC-2 type transport system permease protein
COO91_10641	1.38255	1.09917	10.7444	0.00444	0.015568	9	9	2	26	43	33	none	Esterase/lipase
COO91_09698	1.38038	2.71321	12.6667	0.00241623	0.0094314	6	3	10	32	20	47	none	hypothetical protein
COO91_10470	1.37745	0.130632	7.09903	0.0163499	0.0446783	2	3	4	17	10	20	none	hypothetical protein
COO91_01133	1.3773	1.22224	8.98996	0.0080877	0.0254406	5	15	5	42	54	30	none	hypothetical protein
COO91_06364	1.3768	4.58514	26.3765	0.000146744	0.000890212	88	99	89	397	663	320	none	Glycosyltransferase involved in cell wall bisynthesis
COO91_04714	1.37522	0.609743	7.57155	0.0136265	0.0385302	3	7	4	15	33	23	none	hypothetical protein
COO91_07541	1.37508	3.21782	28.6464	5.29112e-05	0.000379279	34	36	20	127	162	167	none	Glycosyltransferase involved in cell wall bisynthesis
COO91_03973	1.37417	4.43952	50.0351	1.87565e-06	2.1281e-05	75	96	69	349	505	349	none	Catechol 2%2C3-dioxygenase or other lactoylglutathione lyase family enzyme
COO91_02432	1.37201	4.94005	74.0345	1.34203e-07	2.26971e-06	124	115	151	645	555	800	none	hypothetical protein
COO91_07566	1.37186	5.42115	77.3725	9.84814e-08	1.74462e-06	201	153	174	871	837	992	E4.2.1.46	dTDP-glucose 4,6-dehydratase [EC:4.2.1.46]
COO91_01368	1.37084	2.49838	24.7253	0.000116292	0.000732251	15	19	18	86	99	78	none	MFS family permease
COO91_05859	1.36677	3.0062	26.1663	8.6315e-05	0.00056657	36	22	38	143	209	132	none	Lysophospholipase%2C alpha-beta hydrolase superfamily
COO91_04267	1.3666	8.01156	151.717	6.79441e-10	2.41071e-08	860	782	902	4542	3853	4572	none	Multidrug efflux pump subunit AcrA
COO91_03939	1.36428	1.37037	17.6565	0.000599821	0.00294576	12	8	7	44	49	44	none	Zn-dependent protease with chaperone function
COO91_03081	1.3639	2.64991	31.2693	3.24709e-05	0.000248385	22	28	22	111	141	109	none	hypothetical protein
COO91_03729	1.36322	2.22011	12.7242	0.00248321	0.00965455	19	20	9	60	112	67	none	Ribosomal protein S18 acetylase RimI and related acetyltransferases
COO91_00890	1.36227	1.11554	13.4724	0.0018972	0.00774863	6	4	12	32	39	41	none	Mobile element protein
COO91_00481	1.36091	1.00173	10.8707	0.00425978	0.0150679	5	5	4	16	27	28	none	4-amino-4-deoxy-L-arabinose transferase or related glycosyltransferase of PMT family
COO91_10895	1.36059	4.46267	81.8914	6.58989e-08	1.23757e-06	94	97	101	518	407	557	none	cAMP-binding domain of CRP or a regulatory subunit of cAMP-dependent protein kinases
COO91_10380	1.35872	3.38501	48.8118	2.19938e-06	2.45171e-05	44	41	43	225	234	184	none	hypothetical protein
COO91_08863	1.35647	1.20631	13.4391	0.00191597	0.007817	3	10	10	48	37	31	ruvC	holliday junction resolvase
COO91_09700	1.35633	1.16367	7.90899	0.0119962	0.0347836	7	3	1	16	20	20	none	hypothetical protein
COO91_06901	1.35593	0.118018	6.83952	0.0181062	0.0484143	3	4	2	17	13	16	none	XisI protein
COO91_06323	1.35545	5.95951	43.5128	8.75616e-06	8.0661e-05	264	238	220	1088	1572	921	none	hypothetical protein
COO91_08267	1.35544	3.1035	28.4288	5.51696e-05	0.000392092	47	37	36	189	263	145	none	Prophage antirepressor
COO91_07855	1.35435	0.2181	8.82826	0.00856796	0.0265808	5	4	2	14	17	25	none	hypothetical protein
COO91_06409	1.35079	3.80422	33.2619	2.28176e-05	0.00018349	44	45	75	289	214	328	none	Glycosyltransferase%2C GT2 family
COO91_01158	1.34906	1.49067	17.3096	0.000655997	0.00317696	9	6	10	41	42	43	parA	chromosome partitioning protein
COO91_10568	1.34857	0.790556	8.54595	0.00948592	0.0287849	6	6	5	20	36	29	none	hypothetical protein
COO91_09459	1.34853	1.71779	19.455	0.000382763	0.00201607	8	14	12	55	46	70	none	Non-ribosomal peptide synthetase component F
COO91_06199	1.34605	2.12544	17.3013	0.000657407	0.00318237	18	14	14	72	101	55	none	Protein of unknown function DUF1823
COO91_00649	1.34594	2.38932	27.9495	6.05375e-05	0.000423567	16	20	13	75	84	85	none	DNA-binding response regulator%2C OmpR family%2C containings REC and winged-helix
COO91_02100	1.34548	1.90625	13.2413	0.002032	0.00818241	14	19	8	51	68	85	none	Lysophospholipase%2C alpha-beta hydrolase superfamily
COO91_03466	1.34119	1.63313	14.6736	0.00134015	0.0058233	17	12	12	56	97	49	none	hypothetical protein
COO91_01985	1.34105	1.29679	8.55855	0.00944265	0.0286696	10	3	11	38	49	33	DNMT1	DNA (cytosine-5)-methyltransferase 1 [EC:2.1.1.37]
COO91_08910	1.33887	3.90474	14.3459	0.00231262	0.00907608	66	59	58	208	491	188	none	Transposase
COO91_11089	1.33727	1.1567	12.1954	0.00279302	0.0106113	8	6	3	28	28	29	none	Site-specific recombinase XerD
COO91_07707	1.33474	1.29675	11.1924	0.00383676	0.0138246	4	8	12	40	21	60	none	Mobile element protein
COO91_06856	1.33471	2.89538	46.2886	3.08447e-06	3.27959e-05	28	30	36	148	164	153	none	hypothetical protein
COO91_08961	1.33363	1.26518	7.2346	0.01551	0.0428563	10	5	4	24	17	55	none	nuclease A inhibitor family protein
COO91_09465	1.3309	1.43609	20.0531	0.00033139	0.00178812	10	8	11	54	38	53	mbtH	MbtH protein
COO91_02916	1.32977	1.69493	23.5526	0.000149427	0.000903574	10	15	12	61	46	77	none	Mannosyltransferase related to Gpi18
COO91_10774	1.32971	0.907198	11.4716	0.00350776	0.012827	5	7	5	29	20	36	none	hypothetical protein
COO91_08396	1.32971	2.08811	13.8063	0.00171985	0.00712424	21	8	7	80	50	50	none	Mobile element protein
COO91_02143	1.32885	2.79298	30.7373	3.577e-05	0.000271701	29	21	22	123	112	122	none	Sugar transferase involved in LPS biosynthesis
COO91_01806	1.32877	8.01001	54.6332	2.33532e-06	2.58197e-05	951	1088	899	3283	5640	5391	none	hypothetical protein
COO91_09621	1.32837	9.4018	92.1842	2.81746e-08	5.97964e-07	4063	3412	3683	17355	20992	16467	none	Tetratricopeptide
COO91_07667	1.32805	2.61406	37.7599	1.08225e-05	9.72137e-05	21	19	27	119	95	119	none	Glutamate-1-semialdehyde aminotransferase
COO91_04360	1.32746	1.0139	7.20633	0.015681	0.0432546	4	10	6	29	53	15	none	hypothetical protein
COO91_01951	1.3257	5.51333	78.2445	9.09992e-08	1.62269e-06	183	160	164	810	929	747	none	Glutamate-1-semialdehyde aminotransferase
COO91_10220	1.32531	4.00363	30.3077	3.87087e-05	0.000290557	35	61	25	233	141	222	none	hypothetical protein
COO91_10473	1.32452	3.34442	27.9694	6.03027e-05	0.00042247	41	31	56	200	253	175	parB	chromosome partitioning protein, ParB family
COO91_10893	1.32115	2.0563	28.4849	5.45775e-05	0.000388905	16	14	14	82	57	79	none	hypothetical protein
COO91_02212	1.3185	1.8167	9.38742	0.00746571	0.0237598	16	8	19	46	114	48	none	Transposase
COO91_00143	1.31829	3.27628	26.3118	8.38056e-05	0.000552443	38	27	41	170	196	153	none	Membrane-bound lytic murein transglycosylase
COO91_05363	1.31647	0.595855	7.4605	0.014217	0.0399233	3	4	3	22	9	19	none	fdxN element excision controlling factor protein
COO91_06034	1.31469	5.43279	113.242	6.21659e-09	1.6646e-07	128	161	167	819	675	736	none	Serine/threonine protein kinase
COO91_00773	1.31223	4.24085	9.13459	0.0118884	0.0345544	161	35	134	505	696	419	ilvB	acetolactate synthase large subunit
COO91_09529	1.31216	7.51368	135.213	1.63792e-09	5.0799e-08	880	846	806	3789	4354	4164	none	hypothetical protein
COO91_06677	1.31081	6.41068	57.632	9.20943e-07	1.16588e-05	421	336	450	1828	2356	1672	none	Myosin heavy chain
COO91_09592	1.31033	5.26659	109.327	8.07364e-09	2.05621e-07	119	156	131	662	644	663	none	DNA-binding response regulator%2C NarL/FixJ family%2C containings REC and HTH domains
COO91_06341	1.30856	5.12201	21.0366	0.000521852	0.00263457	106	86	116	424	731	320	none	Nucleoside-diphosphate-sugar epimerase
COO91_09144	1.30822	5.29776	86.8283	4.33773e-08	8.71086e-07	169	175	156	713	907	794	none	Transposase
COO91_10275	1.30759	7.75719	135.156	1.64326e-09	5.0819e-08	896	1237	1096	5200	5087	5328	none	Serine/threonine protein kinase
COO91_08091	1.30499	2.96474	36.4263	1.34097e-05	0.000116396	37	33	43	150	214	182	none	IS4 transposase
COO91_09647	1.30332	2.25659	21.4853	0.000236993	0.00135362	16	18	14	75	84	73	none	Winged helix-turn-helix DNA-binding domain
COO91_07232	1.3031	1.66145	11.0904	0.00396554	0.0141894	14	5	12	55	58	38	none	hypothetical protein
COO91_00273	1.30272	5.67694	130.558	2.13632e-09	6.41813e-08	190	218	173	933	838	1044	none	ABC-type bacteriocin/lantibiotic exporters%2C containing an N-terminal double-glycine peptidase domain
COO91_01807	1.30265	8.20232	54.9418	2.04629e-06	2.30719e-05	1051	1243	988	3695	6043	5970	none	hypothetical protein
COO91_09813	1.30127	1.89329	16.7049	0.000768623	0.00363618	20	17	16	67	115	72	none	DNA-binding transcriptional regulator%2C XRE family
COO91_03584	1.30102	2.19602	13.9719	0.00163889	0.00684654	13	16	23	67	115	67	none	hypothetical protein
COO91_00552	1.30062	3.58212	58.242	6.92041e-07	9.17972e-06	46	50	43	263	192	220	none	Na+-dependent bicarbonate transporter superfamily
COO91_02910	1.29644	1.82536	12.9013	0.00225023	0.00887605	21	9	9	65	68	56	none	Prokaryotic membrane lipoprotein lipid attachment site profile
COO91_00777	1.29587	3.45586	11.0581	0.00573591	0.0192156	86	19	65	254	306	269	scyE	Sugar lactone lactonase YvrE
COO91_06411	1.29172	4.86694	77.321	9.89449e-08	1.74997e-06	131	133	102	534	574	648	none	Glycosyltransferase involved in cell wall bisynthesis
COO91_09179	1.28962	6.42121	101.65	1.38138e-08	3.30066e-07	284	393	328	1734	1635	1421	none	2-polyprenyl-3-methyl-5-hydroxy-6-metoxy-1%2C4-benzoquinol methylase
COO91_10817	1.2892	1.84236	20.9893	0.000265767	0.00148664	16	19	20	86	89	89	none	Mobile element protein
COO91_04771	1.28775	4.88112	86.0367	4.6322e-08	9.16617e-07	103	124	106	498	526	567	none	Esterase/lipase
COO91_03751	1.28684	5.99801	95.0699	2.25271e-08	4.99659e-07	229	258	277	1295	1226	1134	none	Transposase
COO91_11181	1.28668	4.65895	58.1653	6.98155e-07	9.24948e-06	117	93	83	404	502	495	none	SRSO17 transposase
COO91_02292	1.28555	4.48383	59.9284	5.71662e-07	7.79303e-06	58	50	66	309	271	256	none	Type V secretory pathway%2C adhesin AidA
COO91_10438	1.28265	1.12992	8.42548	0.00991111	0.0297994	5	10	8	32	49	28	none	hypothetical protein
COO91_08455	1.2823	3.40662	41.1639	6.4111e-06	6.16368e-05	50	41	47	201	225	234	none	putative protein%2C containings caspase domain
COO91_03154	1.28118	4.07727	27.7508	7.02776e-05	0.000479927	84	61	88	313	498	291	relE	mRNA interferase RelE/StbE
COO91_11082	1.2805	0.820329	7.67916	0.0130808	0.0373382	2	7	5	19	24	24	none	putative membrane protein
COO91_00274	1.2795	5.12971	66.337	2.86948e-07	4.3869e-06	128	146	139	598	750	604	none	Multidrug efflux pump subunit AcrA
COO91_10665	1.27915	4.86401	71.5388	1.70436e-07	2.80365e-06	85	78	80	397	350	416	none	Bacteriophage Mx8%2C p63%2C C-terminal
COO91_09764	1.27899	3.19857	25.2802	0.00010355	0.000663208	53	41	40	200	281	151	none	Prophage antirepressor
COO91_00352	1.27832	0.260646	8.13092	0.0110447	0.032486	7	3	3	17	17	29	none	putative restriction /modification enzyme
COO91_08553	1.27749	1.20173	12.2547	0.00274217	0.0104733	7	5	12	41	41	33	none	Parvulin-like peptidyl-prolyl isomerase
COO91_10729	1.27749	4.75448	81.0193	7.1107e-08	1.31342e-06	127	109	122	571	588	546	none	Protein kinase-like domain
COO91_02026	1.27699	0.976022	8.42984	0.00989535	0.0297823	8	9	4	26	48	25	none	hypothetical protein
COO91_01504	1.27663	1.21491	11.7464	0.00321453	0.0119158	10	6	9	34	38	48	none	Transposase%2C TnpA family
COO91_09934	1.27291	1.0727	10.721	0.00447434	0.0156529	6	8	6	32	23	41	none	hypothetical protein
COO91_11151	1.27255	1.16947	13.9474	0.0016506	0.00689277	5	11	10	32	46	45	none	Deoxyribonuclease I
COO91_08461	1.27223	1.74877	17.671	0.000597584	0.00293744	19	14	10	78	74	52	none	Retron-type reverse transcriptase
COO91_01157	1.26872	1.09595	10.2293	0.00526978	0.0179372	3	7	10	44	21	31	none	Chromosome segregation protein Spo0J%2C containings ParB-like nuclease domain
COO91_09406	1.26543	2.44719	20.64	0.000288377	0.00159255	21	23	20	125	102	75	NQO1	NAD(P)H dehydrogenase (quinone) [EC:1.6.5.2]
COO91_07961	1.26489	2.20738	19.181	0.000409235	0.00213988	23	18	13	86	88	81	none	phycobilisome protein
COO91_10421	1.26208	4.36158	77.52	9.7169e-08	1.72419e-06	86	101	106	475	391	520	none	Phenylpropionate dioxygenase or related ring-hydroxylating dioxygenase%2C large terminal subunit
COO91_08135	1.26059	2.18171	7.11111	0.016273	0.0444908	5	3	4	20	22	15	none	DNA-directed RNA polymerase specialized sigma subunit%2C sigma24 family
COO91_03858	1.26026	3.87878	37.4721	1.13297e-05	0.000101266	55	66	75	330	325	264	none	hypothetical protein
COO91_09706	1.26022	1.60007	9.31785	0.0072043	0.0231118	5	5	2	21	19	17	DNMT1	DNA (cytosine-5)-methyltransferase 1 [EC:2.1.1.37]
COO91_09330	1.25783	2.78451	27.0328	7.25119e-05	0.000493008	18	19	29	120	92	100	-	AraC family transcriptional regulator
COO91_07176	1.25758	2.94229	24.4411	0.000123492	0.000770417	29	35	29	130	188	113	none	Lysophospholipase L1 or related esterase
COO91_00862	1.25549	1.78145	13.7608	0.00174289	0.00720863	7	18	16	50	71	70	xerC	integrase/recombinase XerC
COO91_06559	1.25467	1.85102	12.0849	0.00289074	0.0108871	16	10	13	51	69	63	hsdS	type I restriction enzyme, S subunit [EC:3.1.21.3]
COO91_08627	1.25326	1.43823	14.1638	0.00155035	0.00654997	8	10	9	47	51	28	none	PEP-CTERM protein-sorting domain
COO91_02957	1.25293	3.55246	34.2809	1.91568e-05	0.000157923	30	55	51	235	161	243	none	Lysophospholipase%2C alpha-beta hydrolase superfamily
COO91_06414	1.2487	4.68133	37.2438	1.1771e-05	0.000103838	118	106	125	447	706	458	ABC-2.LPSE.A	lipopolysaccharide transport system ATP-binding protein
COO91_09723	1.24863	7.7557	57.8063	1.00904e-06	1.25683e-05	1026	955	884	4100	5578	3537	none	Cdc6-related protein%2C AAA superfamily ATPase
COO91_01213	1.2486	5.34058	96.9797	1.9489e-08	4.4504e-07	157	201	179	771	795	933	none	Outer membrane protein assembly factor BamB%2C containings PQQ-like beta-propeller repeat
COO91_10816	1.24642	5.45203	70.2281	1.93763e-07	3.1117e-06	317	230	256	1350	1166	1252	none	hypothetical protein
COO91_09058	1.24488	2.99269	26.5384	8.00559e-05	0.000531937	17	42	30	128	137	146	recJ	single-stranded-DNA-specific exonuclease
COO91_00404	1.24353	1.06227	9.52417	0.00670451	0.0217796	6	6	10	29	46	27	cas6	CRISPR-associated endoribonuclease Cas6 [EC:3.1.-.-]
COO91_04193	1.24316	5.6357	39.3437	1.13673e-05	0.000101518	204	199	204	898	1162	733	pstS	phosphate transport system substrate-binding protein
COO91_06192	1.24256	5.51686	17.3372	0.00136901	0.00591544	294	218	218	906	1678	748	none	putative protein YjbI%2C containings pentapeptide repeats
COO91_09314	1.24157	0.950142	9.69698	0.00631591	0.0207688	10	4	8	39	25	40	none	Site-specific recombinase XerD
COO91_07599	1.24085	1.93104	14.1185	0.00157076	0.00662586	11	19	12	73	48	75	urtD	ABC-type urea transport system ATP-binding protein
COO91_01149	1.2404	1.8881	11.9902	0.00297747	0.0111593	16	13	9	44	88	42	none	sRNA-binding protein
COO91_02057	1.23936	1.96844	14.6381	0.0013537	0.00586895	11	23	17	73	103	57	none	hypothetical protein
COO91_00271	1.23934	1.57373	16.1217	0.000898194	0.00415632	9	14	11	48	59	50	none	hypothetical protein
COO91_08936	1.23853	5.55783	107.041	9.44046e-09	2.3599e-07	161	211	162	816	800	846	ppx-gppA	exopolyphosphatase / guanosine-5'-triphosphate,3'-diphosphate pyrophosphatase [EC:3.6.1.11 3.6.1.40]
COO91_03371	1.23804	1.25802	11.0188	0.00405885	0.0144516	7	11	5	47	19	42	none	Acyl-coenzyme A thioesterase PaaI%2C containings HGG motif
COO91_02556	1.23728	7.14767	110.634	7.39204e-09	1.91874e-07	628	628	544	2567	2990	2731	none	Ca2+-binding protein%2C RTX toxin-related
COO91_08709	1.23636	3.19557	37.8417	1.06831e-05	9.62009e-05	35	38	33	155	161	174	E2.2.1.2	transaldolase [EC:2.2.1.2]
COO91_09836	1.23592	1.14627	11.8082	0.0031525	0.0117099	8	6	10	37	35	40	none	hypothetical protein
COO91_09652	1.23414	1.35576	13.142	0.00209316	0.00836671	5	7	10	29	36	37	none	hypothetical protein
COO91_05801	1.23286	5.2165	19.8231	0.000668069	0.00322677	163	148	183	587	1089	567	none	Lipoprotein-anchoring transpeptidase ErfK/SrfK
COO91_01802	1.23235	3.10657	23.2215	0.00016061	0.000961421	24	28	34	126	160	108	none	Multidrug efflux pump subunit AcrA
COO91_09725	1.2313	6.39917	83.9676	5.51324e-08	1.06563e-06	349	312	373	1462	1742	1554	none	ATPase involved in DNA repair
COO91_03547	1.23028	3.9918	54.8407	1.03144e-06	1.28326e-05	63	84	62	344	276	343	none	hypothetical protein
COO91_00962	1.23012	3.96504	53.7051	1.18354e-06	1.43939e-05	66	69	70	356	288	303	none	Phenylpropionate dioxygenase or related ring-hydroxylating dioxygenase%2C large terminal subunit
COO91_01080	1.23011	2.28474	13.7018	0.00177329	0.00732038	10	20	12	58	51	85	none	Transposase%2C IS5 family
COO91_03471	1.22935	1.85742	11.2231	0.00379887	0.0137027	21	15	7	49	80	68	none	hypothetical protein
COO91_07665	1.22873	3.55621	40.7489	6.82199e-06	6.51732e-05	39	50	41	203	166	231	none	Glutamate-1-semialdehyde aminotransferase
COO91_10760	1.22696	4.9977	62.5286	4.29278e-07	6.19533e-06	99	174	123	580	631	588	none	Ca2+-binding protein%2C RTX toxin-related
COO91_10834	1.22675	4.19101	42.985	4.90722e-06	4.95809e-05	64	82	49	331	210	360	none	ATPase involved in DNA repair
COO91_07459	1.2263	1.33983	11.1408	0.00390126	0.0140057	4	8	7	24	24	40	none	hypothetical protein
COO91_00738	1.2257	1.54342	12.5621	0.00249468	0.00969218	8	13	14	45	63	52	none	Transcriptional regulator
COO91_07623	1.22449	4.59641	50.0377	1.87502e-06	2.1281e-05	113	105	75	415	503	417	none	protein of unknown function DUF4340
COO91_09895	1.22376	3.15562	29.7984	4.25491e-05	0.000315375	46	35	36	155	222	156	none	hypothetical protein
COO91_01280	1.2236	4.76706	30.9909	4.06376e-05	0.000302935	101	145	110	509	716	375	none	Cytochrome P450
COO91_01124	1.22156	3.48927	36.9465	1.23261e-05	0.000107769	72	58	67	263	346	290	none	hypothetical protein
COO91_05634	1.22073	6.51387	45.9745	4.74867e-06	4.82626e-05	407	443	393	1825	2399	1383	none	hypothetical protein
COO91_01815	1.21978	3.14163	19.761	0.000355448	0.00189339	35	46	38	144	210	185	none	hypothetical protein
COO91_01163	1.21824	0.951221	10.5831	0.00468283	0.0162562	6	4	6	23	22	29	none	SRSO17 transposase
COO91_10287	1.21791	1.59118	13.6307	0.00181069	0.00744036	12	13	11	68	63	33	pvdQ	acyl-homoserine-lactone acylase [EC:3.5.1.97]
COO91_00194	1.21748	0.921707	8.04927	0.0113845	0.0332953	4	12	4	28	32	31	none	8-oxo-dGTP pyrophosphatase MutT and related house-cleaning NTP pyrophosphohydrolases%2C NUDIX family
COO91_09271	1.2157	2.37397	15.3645	0.00110453	0.00494729	16	30	10	93	69	93	none	putative transposase YbfD/YdcC associated with H repeats
COO91_09371	1.21559	5.76299	58.9391	6.39143e-07	8.5726e-06	275	289	243	1110	1480	1047	none	DNA-binding response regulator%2C NarL/FixJ family%2C containings REC and HTH domains
COO91_09614	1.21534	0.533912	6.93543	0.0174332	0.0469829	3	2	6	13	15	23	none	hypothetical protein
COO91_03593	1.21443	1.24099	7.30505	0.01516	0.0420641	10	11	11	33	83	27	none	hypothetical protein
COO91_11090	1.21284	2.26725	17.1193	0.000689301	0.00330864	26	18	25	88	138	86	none	hypothetical protein
COO91_07153	1.21197	3.63859	23.2801	0.000162418	0.000970742	65	54	57	215	368	207	none	putative transposase YdaD
COO91_02524	1.2112	1.84867	16.1311	0.000895919	0.00415286	12	19	8	70	56	51	none	Quinol monooxygenase YgiN
COO91_08062	1.20906	5.07	50.5562	1.75421e-06	2.03076e-05	161	130	106	510	624	666	none	SRSO17 transposase
COO91_00490	1.20858	7.33522	68.3432	2.33825e-07	3.65012e-06	825	912	918	3677	4571	3704	HSP20	HSP20 family protein
COO91_10437	1.20799	5.37048	24.9416	0.000209166	0.0012146	163	175	229	694	1176	664	none	hypothetical protein
COO91_05913	1.20777	2.4923	28.5791	5.35986e-05	0.000382938	25	22	16	87	104	94	none	hypothetical protein
COO91_09940	1.20772	5.00776	22.7278	0.000319846	0.00173448	217	155	159	655	1102	622	none	Type I restriction-modification system%2C DNA methylase subunit
COO91_08319	1.20771	5.06768	51.7199	1.51354e-06	1.79044e-05	160	130	106	509	619	666	none	SRSO17 transposase
COO91_06735	1.20765	7.07422	87.5119	4.10018e-08	8.26451e-07	487	451	550	2293	2432	2015	gmd	GDPmannose 4,6-dehydratase [EC:4.2.1.47]
COO91_04177	1.20745	5.05307	57.928	7.17449e-07	9.48189e-06	142	168	153	713	801	566	none	Forkhead associated
COO91_08931	1.20731	5.63414	65.8345	3.02282e-07	4.57609e-06	158	122	165	643	709	670	none	hypothetical protein
COO91_07847	1.20726	2.89953	36.1769	1.39665e-05	0.00012017	29	35	43	177	164	144	DnaJ8	Curved DNA-binding protein CbpA%2C containings a DnaJ-like domain
COO91_09586	1.20703	2.17864	19.4948	0.000379079	0.00200317	11	15	16	65	59	67	none	Type IV secretory pathway%2C VirD4 component%2C TraG/TraD family ATPase
COO91_07768	1.20682	5.05255	52.1966	1.42581e-06	1.70342e-05	156	130	106	502	614	658	none	SRSO17 transposase
COO91_06668	1.20586	3.40227	19.2583	0.000401567	0.00210385	33	26	42	162	185	109	none	putative ABC-type transport system%2C permease component
COO91_08607	1.2054	5.06462	51.3051	1.59482e-06	1.87227e-05	160	130	106	507	619	665	none	SRSO17 transposase
COO91_08372	1.20401	5.08382	53.0654	1.28016e-06	1.54131e-05	161	133	107	520	621	671	none	SRSO17 transposase
COO91_02533	1.20346	3.07837	21.8653	0.000217309	0.00125784	23	20	33	127	125	92	none	Short-chain dehydrogenase/reductase SDR
COO91_08308	1.20279	5.06337	51.3117	1.59348e-06	1.87227e-05	160	130	106	507	616	665	none	SRSO17 transposase
COO91_09201	1.20158	2.49588	15.421	0.0010874	0.00488384	34	29	31	89	161	173	none	hypothetical protein
COO91_02016	1.20071	1.97306	15.7642	0.00098966	0.00451796	19	10	15	64	76	59	none	DNA modification methylase
COO91_01199	1.19985	5.06564	51.535	1.54918e-06	1.82661e-05	160	130	107	507	616	666	none	SRSO17 transposase
COO91_10620	1.19938	4.23571	55.6522	9.36155e-07	1.181e-05	76	90	87	344	430	358	none	Tetratricopeptide
COO91_03225	1.19866	4.39752	68.8491	2.22232e-07	3.48614e-06	94	86	99	408	421	430	none	MoxR-like ATPase
COO91_00654	1.19843	3.79421	30.1102	4.01504e-05	0.000299716	56	50	74	326	245	246	none	Chemotaxis protein histidine kinase CheA
COO91_08232	1.197	1.57129	7.32148	0.0153236	0.04242	12	11	13	47	72	42	none	Formylglycine-generating enzyme%2C required for sulfatase activity%2C containings SUMF1/FGE domain
COO91_11133	1.19618	4.13826	39.4954	8.25336e-06	7.66818e-05	65	84	53	325	340	234	none	hypothetical protein
COO91_09583	1.19525	3.34102	19.6488	0.00036542	0.00193983	56	33	32	184	222	136	none	Cell division protein DedD
COO91_02382	1.19402	2.95097	14.3169	0.00162222	0.00678998	46	34	33	160	240	101	none	Glyoxalase/Bleomycin resistance protein/Dihydroxybiphenyl dioxygenase
COO91_06734	1.19262	6.51009	48.6368	2.71427e-06	2.93206e-05	417	381	485	1708	2394	1610	TSTA3	GDP-L-fucose synthase [EC:1.1.1.271]
COO91_00044	1.19255	4.54389	57.7878	7.29137e-07	9.61289e-06	103	97	96	450	439	440	parB	chromosome partitioning protein, ParB family
COO91_00434	1.19231	1.95223	15.8396	0.00096952	0.004441	14	16	15	67	58	78	none	Ca2+-binding protein%2C RTX toxin-related
COO91_07622	1.19193	3.53961	41.3066	6.27632e-06	6.07646e-05	34	49	46	198	191	188	purU	formyltetrahydrofolate deformylase [EC:3.5.1.10]
COO91_00819	1.19118	2.01929	16.2808	0.000860555	0.00400975	15	9	23	68	74	70	none	Harbinger transposase-derived nuclease domain
COO91_10468	1.18979	4.85719	11.1971	0.00641447	0.0210029	197	127	142	532	1104	411	none	hypothetical protein
COO91_07963	1.18947	5.08437	55.5672	9.45662e-07	1.19021e-05	160	133	114	521	626	674	none	SRSO17 transposase
COO91_07068	1.18734	6.18983	80.8655	7.20724e-08	1.32672e-06	267	357	297	1506	1124	1496	none	Carbohydrate-selective porin OprB
COO91_01799	1.18672	4.35277	45.721	3.33466e-06	3.51454e-05	45	58	58	238	222	260	none	hypothetical protein
COO91_05965	1.18568	1.60128	12.1882	0.0027993	0.0106277	11	9	17	62	58	46	none	Protein of unknown function DUF4288
COO91_02141	1.18317	2.35521	18.9155	0.000436865	0.00226467	19	14	24	96	80	80	none	Nucleotide-diphospho-sugar transferases
COO91_06233	1.18252	4.37102	53.4168	1.22602e-06	1.48484e-05	71	82	58	276	316	344	none	hypothetical protein
COO91_11023	1.18163	4.52783	34.1572	1.9564e-05	0.000161005	81	119	111	460	522	389	none	GTPase SAR1 family domain
COO91_09611	1.18157	0.689346	7.55722	0.0137011	0.038731	3	10	7	30	31	28	none	hypothetical protein
COO91_10627	1.18074	3.85429	28.9334	5.00874e-05	0.000362155	84	71	60	287	405	255	none	hypothetical protein
COO91_01276	1.18072	1.65553	13.1017	0.00211856	0.00843683	9	5	9	29	37	37	ispE	4-diphosphocytidyl-2-C-methyl-D-erythritol kinase [EC:2.7.1.148]
COO91_01980	1.18009	3.28971	27.3595	6.79643e-05	0.000466484	34	49	44	230	154	183	none	MFS family permease
COO91_04195	1.17984	1.33125	7.73468	0.012809	0.0367126	8	14	4	34	43	38	pstA	phosphate transport system permease protein
COO91_05297	1.17904	3.62048	13.0911	0.00288883	0.0108836	71	60	54	198	426	181	none	Endonuclease%2C Uma2 family
COO91_05258	1.17901	6.31801	69.4581	2.09119e-07	3.32869e-06	80	74	72	379	309	320	none	Glucose/arabinose dehydrogenase%2C beta-propeller fold
COO91_00486	1.17754	2.00533	13.2523	0.00202534	0.00815866	23	11	15	70	64	86	ndhD3	NADH dehydrogenase subunit 4
COO91_10651	1.17691	2.09689	15.851	0.000966515	0.00443286	21	19	17	70	88	95	none	hypothetical protein
COO91_00651	1.17674	1.0895	9.35523	0.00711072	0.0228658	6	7	9	34	35	29	none	Chemotaxis signal transduction protein
COO91_04137	1.17599	3.66953	34.7752	1.76216e-05	0.00014706	49	61	59	289	208	256	none	Thioredoxin-like fold
COO91_09622	1.17406	9.79336	58.4072	7.35569e-07	9.67412e-06	4998	5169	5078	20125	27992	18612	none	Large exoprotein involved in heme utilization or adhesion
COO91_11166	1.17166	2.14592	19.2176	0.000405582	0.00212181	13	14	19	72	58	75	none	23S rRNA-intervening sequence protein
COO91_10725	1.17124	1.54957	9.00292	0.00805053	0.0253532	9	16	8	49	66	29	none	P-loop containing nucleoside triphosphate hydrolase
COO91_03804	1.17026	2.70364	14.1413	0.00156048	0.0065876	25	15	34	87	141	98	none	Transposase
COO91_07621	1.1702	4.56722	67.0561	2.66495e-07	4.10319e-06	94	93	103	401	393	492	none	Parvulin-like peptidyl-prolyl isomerase
COO91_04537	1.16877	4.56823	28.8787	5.30462e-05	0.000379748	127	80	89	389	545	366	none	Peptidoglycan/xylan/chitin deacetylase%2C PgdA/CDA1 family
COO91_09674	1.16805	6.33369	78.603	8.8109e-08	1.57896e-06	428	417	317	1824	1393	1938	none	Autotransporter translocation and assembly factor TamB
COO91_04673	1.16777	6.57	132.232	1.93983e-09	5.89375e-08	424	446	377	1850	1746	1901	sdhA	succinate dehydrogenase / fumarate reductase, flavoprotein subunit [EC:1.3.5.1 1.3.5.4]
COO91_00398	1.1672	2.49866	20.5056	0.000297644	0.00163372	21	29	17	136	73	88	none	hypothetical protein
COO91_00059	1.16697	2.62009	22.2444	0.000199476	0.00116207	25	34	27	125	154	96	-	putative DNA primase/helicase
COO91_11030	1.16615	3.8688	34.2622	1.92179e-05	0.000158306	54	52	58	257	261	203	none	Tetratricopeptide
COO91_09805	1.16383	5.60103	60.9948	5.077e-07	7.08241e-06	372	267	292	1479	1316	1326	none	hypothetical protein
COO91_01077	1.16201	2.69772	24.1012	0.000132766	0.00081884	20	27	29	108	127	97	none	hypothetical protein
COO91_05039	1.1618	1.63608	16.13	0.00089619	0.00415286	10	11	14	43	54	57	none	putative Na+-dependent transporter
COO91_10266	1.16088	4.46512	10.4554	0.00743803	0.0237126	123	75	105	310	705	292	cpeB	phycoerythrin beta chain
COO91_02270	1.16	5.58165	59.1264	6.25707e-07	8.4237e-06	245	229	238	1063	1175	871	none	Tfp pilus assembly protein FimV
COO91_09615	1.15988	6.14727	61.0085	5.06935e-07	7.08241e-06	317	278	304	1123	1484	1322	none	ATPase involved in DNA repair
COO91_01825	1.15955	4.76421	49.5662	1.99298e-06	2.25177e-05	149	154	140	594	741	593	none	Periplasmic protein TonB%2C links inner and outer membranes
COO91_01214	1.15914	1.36476	8.36972	0.0101152	0.0302856	3	8	12	28	24	50	none	MFS family permease
COO91_08514	1.15875	1.0861	11.5912	0.00337656	0.0124101	6	7	9	37	32	28	E2.2.1.2	transaldolase [EC:2.2.1.2]
COO91_00487	1.15662	2.84724	33.6123	2.14772e-05	0.000174526	26	33	28	154	109	119	cupA	hypothetical protein
COO91_09226	1.15639	5.54997	45.9199	3.24447e-06	3.42616e-05	170	250	242	924	1076	868	none	Putative intracellular protease/amidase
COO91_03223	1.15501	1.75626	15.3082	0.00112189	0.00500961	12	17	10	63	38	71	none	putative protein%2C containings caspase domain
COO91_01208	1.1539	2.85324	28.7764	5.16104e-05	0.00037143	24	30	31	117	143	109	none	PEP-CTERM protein-sorting domain
COO91_09766	1.15378	4.05628	14.7921	0.00187146	0.00766139	117	70	79	313	566	268	none	hypothetical protein
COO91_10567	1.15304	1.34415	10.5739	0.00469709	0.0162953	6	9	11	40	37	37	none	hypothetical protein
COO91_11159	1.1522	2.28873	15.014	0.00121767	0.0053621	19	36	12	118	75	99	none	Peroxiredoxin
COO91_07152	1.15189	1.77747	11.2594	0.00375473	0.0135787	17	7	18	62	50	74	none	putative transposase YdaD
COO91_08915	1.15141	1.65615	13.4258	0.00192356	0.00784202	9	14	11	43	41	65	none	hypothetical protein
COO91_09767	1.15139	1.21069	11.5155	0.00345896	0.0126657	15	7	10	41	54	45	none	hypothetical protein
COO91_02815	1.15006	1.93704	10.581	0.00468601	0.016262	19	14	14	59	84	61	none	hypothetical protein
COO91_06854	1.14993	2.41968	9.04579	0.00879168	0.0270806	16	29	32	104	52	185	none	Terpene synthase%2C N-terminal domain
COO91_01933	1.14938	2.05124	14.599	0.0013688	0.00591544	25	18	9	73	74	80	none	DNA-binding transcriptional regulator%2C AcrR family
COO91_07199	1.14845	2.14264	20.3975	0.000305342	0.00167005	17	14	16	67	71	67	none	mRNA-degrading endonuclease RelE%2C toxin component of the RelBE toxin-antitoxin system
COO91_01250	1.14837	5.41187	93.2692	2.58838e-08	5.60332e-07	157	216	195	839	748	882	none	WD40 repeat
COO91_10426	1.14788	3.15257	24.7598	0.00011545	0.00072865	39	24	37	139	114	188	none	Tetratricopeptide
COO91_04281	1.14737	0.267871	8.41499	0.00994914	0.0298806	4	5	4	19	19	19	none	hypothetical protein
COO91_02973	1.14585	6.00224	44.7672	4.03721e-06	4.16179e-05	355	338	341	1407	1862	1177	galM	aldose 1-epimerase [EC:5.1.3.3]
COO91_09948	1.14566	0.778684	8.42299	0.00992013	0.0298182	3	5	9	29	17	29	none	hypothetical protein
COO91_03582	1.1436	5.20203	39.0284	8.87008e-06	8.15716e-05	172	163	149	639	885	551	none	ABC-type Zn uptake system ZnuABC%2C Zn-binding component ZnuA
COO91_09464	1.14166	2.22668	18.1904	0.000523584	0.00264086	21	17	29	93	103	95	paaH	3-hydroxybutyryl-CoA dehydrogenase [EC:1.1.1.157]
COO91_00413	1.14022	2.61391	22.3213	0.000196062	0.0011428	28	28	24	117	136	91	none	hypothetical protein
COO91_01490	1.13897	5.12986	33.0582	2.50435e-05	0.000199024	149	119	176	562	777	573	none	ATPase involved in DNA repair
COO91_01285	1.13569	1.41414	10.1292	0.00545046	0.0184397	8	17	5	47	41	41	none	Transposase%2C IS5 family
COO91_10052	1.13566	2.445	23.5362	0.000149961	0.000905832	26	23	28	125	121	86	none	Serine/threonine protein kinase
COO91_00562	1.13449	3.30872	28.0769	5.90559e-05	0.000415079	54	44	53	186	266	195	none	Glutathione synthase/RimK-type ligase%2C ATP-grasp superfamily
COO91_10366	1.13413	3.69119	41.7905	5.84213e-06	5.71231e-05	57	58	56	266	242	229	none	Transposase%2C IS5 family
COO91_09718	1.13355	5.57158	51.9501	1.47044e-06	1.74902e-05	226	340	222	1106	1114	1143	none	Large exoprotein involved in heme utilization or adhesion
COO91_09581	1.13106	2.31588	14.9293	0.00124692	0.00547534	10	27	15	63	64	96	none	NAD/NADP transhydrogenase beta subunit
COO91_08597	1.13086	0.940532	7.42237	0.0144264	0.0403386	8	8	5	16	38	36	none	hypothetical protein
COO91_00772	1.13078	6.38189	26.1362	0.000180164	0.00106157	469	349	526	1650	2438	1662	none	Histidine kinase-like ATPase%2C C-terminal domain
COO91_10855	1.12534	2.68664	25.1815	0.000105696	0.000674959	25	18	21	92	83	101	none	Cell division protein DedD
COO91_10425	1.12423	5.08145	76.6962	1.04759e-07	1.83481e-06	173	179	147	665	705	761	none	Tetratricopeptide
COO91_01515	1.12394	7.79564	25.8935	0.000215694	0.00125049	1208	1346	1161	4867	7094	3642	cpcB	C-phycocyanin beta subunit
COO91_09778	1.12394	0.889629	12.8067	0.00231562	0.00908455	8	8	9	43	30	35	none	hypothetical protein
COO91_08095	1.12373	3.1996	15.2397	0.00116706	0.00518139	44	23	44	118	209	146	none	Serine protease%2C subtilisin family
COO91_11122	1.12321	4.84287	34.3637	1.88896e-05	0.000156077	125	171	122	493	764	497	none	Transposase%2C TnpA family
COO91_08565	1.12202	1.82491	10.1029	0.00549917	0.0185603	18	17	18	66	115	42	none	hypothetical protein
COO91_05367	1.12136	4.52199	32.0159	2.84008e-05	0.000221637	98	111	105	385	563	376	aphA,cph1	phytochrome A, two-component sensor protein
COO91_07397	1.12104	4.04955	31.9982	2.84901e-05	0.000221854	48	43	39	188	143	229	none	Ubiqui/menaqui biosynthesis C-methylase UbiE
COO91_06366	1.1173	3.76376	34.8586	1.73764e-05	0.000145349	60	54	64	231	283	242	none	Lipopolysaccharide biosynthesis protein%2C LPS:glycosyltransferase
COO91_08442	1.11635	2.25577	27.0211	7.26808e-05	0.000493846	19	20	21	87	82	87	tenA	thiaminase (transcriptional activator TenA) [EC:3.5.99.2]
COO91_08270	1.11622	1.06871	11.2296	0.00379093	0.0136822	13	7	9	38	45	41	none	hypothetical protein
COO91_10431	1.11594	3.78128	21.9168	0.000215276	0.00124874	85	73	56	267	390	243	none	hypothetical protein
COO91_00670	1.11391	1.27538	9.35737	0.00710539	0.0228623	16	6	6	40	40	40	ssuA_2	sulfonate transport system substrate-binding protein
COO91_04835	1.11363	1.96735	7.50628	0.0139701	0.0393475	5	14	10	47	17	61	none	hypothetical protein
COO91_00160	1.11113	3.81105	29.8877	4.18457e-05	0.000310657	57	43	53	203	244	201	none	Winged helix-turn-helix DNA-binding domain
COO91_00617	1.11012	1.51491	10.8222	0.004328	0.0152445	10	10	10	45	26	58	none	Plasmid maintenance system antidote protein VapI%2C containings XRE-type HTH domain
COO91_03228	1.10982	2.4783	25.8567	9.19435e-05	0.000597727	22	25	25	108	93	105	none	putative protein%2C containings caspase domain
COO91_10288	1.10861	2.0532	8.83014	0.00864925	0.0267408	19	20	14	49	77	98	none	Cellulose biosynthesis protein BcsQ
COO91_07389	1.10859	2.30209	18.7321	0.000457167	0.00234854	13	27	15	82	72	78	bgtb	arginine/lysine/histidine/glutamine transport system substrate-binding and permease protein
COO91_01295	1.10718	5.4026	71.8881	1.64762e-07	2.73107e-06	219	202	194	809	926	859	none	ATPase involved in DNA repair
COO91_10060	1.10695	1.05204	9.6482	0.00642296	0.0210164	8	9	6	29	27	42	none	putative restriction /modification enzyme
COO91_02139	1.1054	3.17902	12.5646	0.00274593	0.0104836	52	28	37	180	215	97	none	Glycosyltransferase%2C GT2 family
COO91_07916	1.10431	3.79839	11.1088	0.00529588	0.0180033	87	66	71	250	493	184	none	hypothetical protein
COO91_00186	1.10416	2.52127	12.6395	0.0024364	0.00949985	15	19	30	105	78	89	none	putative transposase YdaD
COO91_03613	1.10178	1.47808	8.4092	0.00997019	0.0299272	6	16	10	45	38	52	none	ABC-type putative transport system%2C ATPase component
COO91_09040	1.10105	3.62821	23.317	0.000157293	0.000944806	62	65	57	198	340	226	none	Endonuclease%2C Uma2 family
COO91_06507	1.09881	2.86533	25.6921	9.51007e-05	0.000614916	29	34	23	144	99	120	none	hypothetical protein
COO91_01007	1.09779	2.12913	12.1842	0.00280283	0.0106355	20	11	14	73	66	51	none	Protein of unknown function DUF1822
COO91_03938	1.09752	1.59893	11.7359	0.00322527	0.0119474	13	11	13	60	53	43	lemA	LemA protein
COO91_02344	1.09713	2.53574	24.0236	0.000134992	0.000825511	31	27	22	96	114	126	ureA	urease subunit gamma [EC:3.5.1.5]
COO91_06803	1.09694	2.5486	25.3998	0.000101014	0.000648887	25	24	24	102	111	93	none	hypothetical protein
COO91_02350	1.09684	1.64829	16.1175	0.0008992	0.0041576	12	14	13	46	65	52	none	Mobile element protein
COO91_00730	1.09644	1.22547	10.0138	0.00566764	0.0190222	10	6	9	32	44	29	none	Type II restriction/modification system%2C DNA methylase subunit YeeA
COO91_09205	1.0956	3.56611	14.4258	0.001679	0.00700596	46	67	66	196	329	214	none	Arc-type ribbon-helix-helix
COO91_08949	1.09553	3.88187	41.1655	6.40963e-06	6.16368e-05	50	75	57	239	263	256	none	hypothetical protein
COO91_08269	1.09406	3.72121	16.23	0.00101745	0.00461949	97	60	63	261	430	221	none	hypothetical protein
COO91_09461	1.09312	2.5197	9.41675	0.00746776	0.0237598	37	12	34	86	140	123	none	putative enzyme involved in methoxymalonyl-ACP biosynthesis
COO91_06132	1.09262	1.34326	9.97663	0.00573972	0.0192224	9	8	8	29	37	39	none	glutaredoxin 2
COO91_03753	1.09242	2.96501	18.4707	0.000487956	0.00248431	41	29	33	116	187	125	none	Harbinger transposase-derived nuclease domain
COO91_02343	1.09003	3.63615	23.0709	0.000166006	0.000988363	68	53	57	217	324	196	ureD	urease accessory protein
COO91_10884	1.08993	1.84012	11.6894	0.00327304	0.0120748	16	17	16	80	79	45	none	DNA-directed RNA polymerase%2C sigma subunit
COO91_08575	1.08899	2.46901	8.08682	0.0122702	0.0354639	23	33	19	107	92	114	none	putative phosphotransferase%2C aminoglycoside/choline kinase
COO91_09931	1.08889	5.6658	79.0686	8.45072e-08	1.53217e-06	246	223	234	930	987	1021	none	Transposase
COO91_08441	1.08824	1.65562	7.29054	0.0151778	0.0421025	11	17	10	51	23	87	none	Superfamily II DNA or RNA helicase
COO91_00818	1.08747	3.44453	24.8864	0.000112422	0.00071203	46	38	56	152	232	198	none	Transposase%2C Helix-turn-helix domain
COO91_01165	1.08594	5.00259	44.8346	3.77203e-06	3.93717e-05	151	141	113	464	590	628	none	SRSO17 transposase
COO91_07907	1.0858	2.10995	15.0707	0.00119851	0.00529066	22	11	20	69	79	74	none	Harbinger transposase-derived nuclease domain
COO91_09724	1.08279	4.63549	35.4773	1.56721e-05	0.000133256	117	125	115	428	615	424	none	hypothetical protein
COO91_00821	1.08158	6.52229	84.7059	5.17896e-08	1.01004e-06	392	536	506	2197	1673	2100	none	Superfamily II DNA or RNA helicase
COO91_01188	1.08076	1.50791	9.92655	0.00583839	0.0194925	10	12	10	46	34	54	metN	D-methionine transport system ATP-binding protein
COO91_08265	1.08035	1.54062	7.9725	0.0117148	0.0341321	23	7	19	65	85	54	none	hypothetical protein
COO91_03773	1.07817	1.58418	8.3607	0.0101487	0.030347	8	15	15	41	68	47	none	Glycosyltransferase%2C catalytic subunit of cellulose synthase and poly-beta-1%2C6-N-acetylglucosamine synthase
COO91_01319	1.07756	1.42789	10.5376	0.00475397	0.016467	12	18	11	50	72	46	none	Ribosomal protein S18 acetylase RimI and related acetyltransferases
COO91_10836	1.07515	2.08287	8.02431	0.0117781	0.034298	9	20	30	56	101	85	xerD	integrase/recombinase XerD
COO91_09727	1.07456	3.9433	20.0869	0.000341265	0.00183318	102	78	66	304	437	266	none	hypothetical protein
COO91_06708	1.07407	5.70841	48.67	2.24079e-06	2.49273e-05	179	149	210	768	762	701	none	Ribosome association toxin PasT
COO91_09097	1.07105	5.59038	14.4355	0.00247821	0.00964322	261	284	275	841	1701	760	none	putative transposase YdaD
COO91_10652	1.0696	1.58243	8.3672	0.0101245	0.030298	11	10	15	44	72	31	none	GTPase SAR1 family domain
COO91_04991	1.0694	5.04936	14.1657	0.00243784	0.00950205	188	180	173	592	1117	472	none	Protein of unknown function DUF4058
COO91_03511	1.06865	2.2963	13.16	0.00208189	0.00833108	10	10	16	64	37	49	rnc	ribonuclease III [EC:3.1.26.3]
COO91_02830	1.06776	2.17486	13.289	0.00200328	0.00809388	30	13	23	89	90	95	none	Transposase
COO91_01462	1.06678	4.37038	42.0754	5.60226e-06	5.508e-05	96	115	66	415	372	346	none	Superfamily II DNA or RNA helicase
COO91_10590	1.06611	7.56596	62.8693	4.13755e-07	6.01139e-06	511	628	554	2356	2572	1968	none	Large exoprotein involved in heme utilization or adhesion
COO91_09747	1.06601	8.38105	51.6846	1.52028e-06	1.79645e-05	966	1337	1143	4363	5291	4341	none	hypothetical protein
COO91_09604	1.06577	6.42054	81.3884	6.88485e-08	1.27704e-06	316	460	415	1811	1377	1710	recD	exodeoxyribonuclease V alpha subunit [EC:3.1.11.5]
COO91_04750	1.06432	5.50231	40.426	7.16219e-06	6.7884e-05	152	264	205	886	841	800	PK	pyruvate kinase [EC:2.7.1.40]
COO91_10508	1.06429	5.27689	70.2342	1.93646e-07	3.1117e-06	163	190	166	674	665	790	none	putative ATPase%2C archaeal AAA+ ATPase superfamily
COO91_09573	1.06292	3.5081	17.887	0.000565472	0.00281799	65	43	54	235	281	145	none	Protein of unknown function DUF192
COO91_07004	1.06118	3.05979	20.5739	0.000292896	0.00161339	42	31	27	120	160	128	none	CemA family protein
COO91_10430	1.06095	3.05216	17.7828	0.000580708	0.0028767	35	25	30	112	104	156	none	Methyl-accepting chemotaxis protein
COO91_07543	1.06011	2.79177	10.5338	0.00491571	0.0169236	20	16	44	104	88	140	none	Glycosyltransferase%2C GT2 family
COO91_03133	1.05833	4.64468	15.3709	0.00159581	0.00670797	118	97	139	440	675	315	none	Tetratricopeptide
COO91_10661	1.05796	3.11349	13.0339	0.00223719	0.00883741	45	36	43	136	243	121	none	hypothetical protein
COO91_01856	1.05756	3.34196	29.4086	4.5776e-05	0.000335237	40	47	56	200	180	206	none	MoxR-like ATPase
COO91_06260	1.05748	7.23136	41.1294	7.57476e-06	7.1357e-05	303	450	455	2105	1103	1775	none	Ferritin-like superfamily
COO91_01511	1.05723	5.02202	53.9817	1.14431e-06	1.39954e-05	123	124	107	531	368	559	cpcD	phycocyanin-associated, rod
COO91_08262	1.05676	1.71674	15.6941	0.00100881	0.00458795	15	18	17	55	60	90	none	hypothetical protein
COO91_06045	1.05609	6.41382	75.3933	1.18156e-07	2.03255e-06	174	179	203	838	634	814	none	Glucose/arabinose dehydrogenase%2C beta-propeller fold
COO91_01317	1.05571	1.9667	11.1144	0.00393481	0.0140981	17	20	19	80	82	66	none	Transposase
COO91_08029	1.05526	1.37299	10.5256	0.00477298	0.0165162	6	16	15	42	46	63	none	IS4 transposase
COO91_09244	1.05484	4.91798	58.8904	6.42688e-07	8.60948e-06	160	132	141	624	591	555	none	Serine/threonine protein kinase
COO91_08337	1.05405	2.61895	15.3336	0.00111402	0.00497655	22	18	32	88	87	121	none	hypothetical protein
COO91_02295	1.05384	2.41647	17.9139	0.000561613	0.00280134	23	25	24	84	102	107	none	Ribosomal protein S18 acetylase RimI and related acetyltransferases
COO91_00453	1.05357	4.32616	15.3235	0.00147124	0.00626463	104	77	103	315	548	280	none	Xanthine/uracil permeases
COO91_09411	1.05317	2.16932	12.329	0.00267996	0.0102865	29	20	10	78	78	85	none	DNA-binding transcriptional regulator%2C AcrR family
COO91_07905	1.05311	1.86321	13.3325	0.00197754	0.00800483	19	13	19	55	88	64	none	IS4 transposase
COO91_07198	1.05308	1.30049	6.79906	0.0183989	0.0490517	10	3	8	34	22	31	none	hypothetical protein
COO91_09653	1.05288	2.25316	16.9757	0.000715704	0.00341719	12	22	18	65	62	85	none	hypothetical protein
COO91_01803	1.0511	2.22361	8.58435	0.00935475	0.0284826	22	11	14	62	90	38	none	Parvulin-like peptidyl-prolyl isomerase
COO91_09157	1.05085	5.40246	33.3778	2.23881e-05	0.000180843	197	241	179	721	1068	677	none	Transposase%2C TnpA family
COO91_09224	1.04966	4.53293	34.1201	1.96881e-05	0.000161687	109	120	97	416	530	364	none	Superfamily II DNA or RNA helicase%2C SNF2 family
COO91_09488	1.04925	2.83256	13.2818	0.00200762	0.00810537	54	24	25	178	128	117	NQO1	NAD(P)H dehydrogenase (quinone) [EC:1.6.5.2]
COO91_01176	1.04817	5.30112	37.3662	1.1523e-05	0.000102255	183	220	168	677	957	649	none	Transposase%2C TnpA family
COO91_00964	1.04807	2.89209	16.881	0.000733733	0.00348968	26	32	48	123	161	145	rpaB	two-component system, OmpR family, response regulator RpaB
COO91_03772	1.04788	1.16115	6.82606	0.0182029	0.048613	4	11	14	39	49	29	none	Glycogen synthase
COO91_07834	1.04733	5.30126	37.3597	1.15349e-05	0.000102255	184	219	168	676	957	649	none	Transposase%2C TnpA family
COO91_01184	1.04733	5.3015	37.362	1.15308e-05	0.000102255	184	219	168	676	957	649	none	Transposase%2C TnpA family
COO91_03455	1.04733	5.3015	37.362	1.15308e-05	0.000102255	184	219	168	676	957	649	none	Transposase%2C TnpA family
COO91_08145	1.04733	5.3015	37.362	1.15308e-05	0.000102255	184	219	168	676	957	649	none	Transposase%2C TnpA family
COO91_08429	1.04733	5.3015	37.362	1.15308e-05	0.000102255	184	219	168	676	957	649	none	Transposase%2C TnpA family
COO91_00718	1.04724	2.85904	23.3205	0.000157172	0.000944806	43	27	30	139	141	127	none	CRISPR-associated protein Cas8a1/Csx13%2C Myxan subtype%2C N-terminal
COO91_08204	1.0471	1.51111	7.12101	0.0162103	0.044367	11	14	6	28	61	35	none	IS4 transposase
COO91_05621	1.04693	2.07911	13.5381	0.00186075	0.00762619	15	16	17	55	86	52	glk	glucokinase [EC:2.7.1.2]
COO91_05220	1.04684	1.38584	7.90563	0.0120113	0.0348087	6	11	10	29	44	36	modA	molybdate transport system substrate-binding protein
COO91_08459	1.04657	2.39016	15.1529	0.00117134	0.00519399	28	18	18	96	93	71	none	Formylglycine-generating enzyme%2C required for sulfatase activity%2C containings SUMF1/FGE domain
COO91_10292	1.04641	2.4683	16.4689	0.000818347	0.00384787	28	40	24	132	106	135	pebB	phycoerythrobilin:ferredoxin oxidoreductase [EC:1.3.7.3]
COO91_08576	1.04509	3.84421	36.2087	1.38941e-05	0.000119737	70	65	59	302	245	241	none	hypothetical protein
COO91_09378	1.04507	4.51387	46.9036	2.83687e-06	3.05535e-05	114	133	92	442	420	509	none	Tetratricopeptide
COO91_08278	1.04422	5.92041	70.37	1.91073e-07	3.08682e-06	249	319	239	1045	1125	1072	prkC	eukaryotic-like serine/threonine-protein kinase [EC:2.7.11.1]
COO91_01808	1.04411	6.59239	46.5277	2.98545e-06	3.18334e-05	310	459	344	1189	1483	1797	none	hypothetical protein
COO91_10188	1.0438	4.43896	36.445	1.3369e-05	0.000116136	115	101	77	362	337	493	none	hypothetical protein
COO91_06670	1.04361	1.42903	12.8438	0.00228971	0.00899922	10	15	10	60	42	40	none	hypothetical protein
COO91_08108	1.0432	2.68101	14.8372	0.00127964	0.00559403	23	17	14	70	84	64	none	hypothetical protein
COO91_01393	1.04138	4.47132	24.6295	0.000118665	0.00074503	86	101	144	391	552	383	none	hypothetical protein
COO91_02346	1.04119	4.55585	30.6304	3.64772e-05	0.000276105	122	134	113	427	590	458	ureC	urease subunit alpha [EC:3.5.1.5]
COO91_09564	1.0407	5.71523	42.2653	5.44854e-06	5.39076e-05	196	194	229	709	972	804	none	hypothetical protein
COO91_01332	1.04032	0.892042	8.24144	0.010603	0.0314086	9	6	6	22	33	30	none	Xanthine and CO dehydrogenase maturation factor%2C XdhC/CoxF family
COO91_04558	1.0402	7.44111	21.8953	0.00044299	0.00229093	847	733	857	2716	4470	2525	none	Tic22 family protein
COO91_08973	1.03979	5.82886	63.9389	3.68964e-07	5.43356e-06	269	309	249	1104	1184	1027	none	Periplasmic serine protease%2C S1-C subfamily%2C containing C-terminal PDZ domain
COO91_07712	1.03666	2.69653	18.5118	0.000482968	0.00246123	18	27	26	104	70	114	none	hypothetical protein
COO91_07535	1.0349	4.52233	19.8312	0.000365749	0.00194062	66	41	82	229	306	225	none	Chromosome partitioning ATPase%2C Mrp family%2C containings Fe-S cluster
COO91_09370	1.0345	5.2993	63.5346	3.85224e-07	5.64142e-06	202	249	174	882	782	841	none	Extracellular
COO91_11201	1.03427	2.4234	11.1082	0.00394271	0.0141217	28	25	29	91	142	94	none	hypothetical protein
COO91_10818	1.03371	2.60639	24.0541	0.000134112	0.000823805	28	40	23	130	110	125	none	Transposase%2C IS1 family
COO91_00794	1.03346	1.58404	7.95072	0.0118104	0.0343553	5	12	13	49	36	36	E4.3.1.19	threonine dehydratase [EC:4.3.1.19]
COO91_00516	1.03307	3.84869	23.8815	0.000139175	0.000847737	86	60	53	261	290	248	none	Nitrous oxidase accessory protein NosD%2C containings tandem CASH domains
COO91_07237	1.03297	3.78492	13.5816	0.00219383	0.00869183	71	74	89	208	451	265	none	Transcriptional regulator%2C containings XRE-family HTH domain
COO91_09738	1.03257	2.66728	17.2287	0.000669934	0.00323212	26	38	31	114	165	97	none	NAD/NADP transhydrogenase beta subunit
COO91_05841	1.0279	5.25718	30.235	3.97301e-05	0.000297193	188	189	179	636	960	600	none	putative oxidoreductase
COO91_08835	1.02766	7.08258	64.6041	3.43852e-07	5.14069e-06	388	386	498	1717	1697	1688	mltA	membrane-bound lytic murein transglycosylase A
COO91_06811	1.02724	3.09867	20.9448	0.000268532	0.00149747	37	40	46	151	158	184	none	Ketosteroid isomerase
COO91_08738	1.02705	3.4357	27.7088	6.34515e-05	0.000439535	36	37	37	137	166	135	none	putative N-acetyltransferase YhbS
COO91_00397	1.02655	3.58336	34.9874	1.70054e-05	0.000142687	54	49	56	254	169	219	none	molybdopterin-guanine dinucleotide biosynthesis protein A like
COO91_09941	1.02421	6.46722	39.3316	8.95905e-06	8.225e-05	577	563	475	2082	2388	1937	none	hypothetical protein
COO91_00492	1.02369	0.953216	9.91812	0.00585519	0.0195426	5	9	9	32	31	29	none	hypothetical protein
COO91_10638	1.02259	2.23083	17.1105	0.000690887	0.00331479	17	15	18	60	56	85	none	Type IV secretory pathway%2C VirB4 component
COO91_07679	1.02149	1.3768	8.17486	0.0108667	0.0320668	6	17	7	38	39	42	parA	chromosome partitioning protein
COO91_07597	1.02082	3.35327	18.8066	0.000448797	0.00231543	77	38	53	205	255	211	urtB	ABC-type urea transport system permease protein
COO91_10829	1.01873	3.06089	21.5581	0.000233076	0.00133553	31	61	47	190	173	187	none	TPR repeat
COO91_07185	1.01848	4.59724	41.9421	5.71316e-06	5.59631e-05	74	110	102	416	355	364	cobL	precorrin-6Y C5,15-methyltransferase (decarboxylating) [EC:2.1.1.132]
COO91_07539	1.01779	3.46558	24.4419	0.00012347	0.000770417	35	44	49	155	145	211	none	O-antigen ligase
COO91_10444	1.01761	1.31676	8.93475	0.00824817	0.0258702	12	7	11	44	41	35	none	AAA+-type ATPase%2C SpoVK/Ycf46/Vps4 family
COO91_09593	1.01727	1.62743	9.49538	0.00677184	0.0219654	12	9	16	57	37	55	none	hypothetical protein
COO91_02223	1.0169	2.89929	19.2351	0.000403848	0.00211478	23	39	38	146	141	108	E2.1.1.72	site-specific DNA-methyltransferase (adenine-specific) [EC:2.1.1.72]
COO91_05692	1.01685	2.10147	20.7211	0.000282944	0.00156574	16	22	16	67	72	75	none	Succinylglutamate desuccinylase/aspartoacylase
COO91_06868	1.01663	3.5954	25.8882	9.13511e-05	0.000595234	55	39	68	241	175	236	queA	S-adenosylmethionine:tRNA ribosyltransferase-isomerase [EC:2.4.99.17]
COO91_10029	1.01383	1.43736	8.42965	0.00989603	0.0297823	13	12	5	42	29	49	none	putative restriction /modification enzyme
COO91_07379	1.01069	3.15205	16.5144	0.000808489	0.00380482	47	44	44	182	226	121	none	hypothetical protein
COO91_03771	1.00892	2.34237	16.8844	0.000733082	0.00348968	18	28	28	76	104	111	none	Chromosome partitioning ATPase%2C Mrp family%2C containings Fe-S cluster
COO91_06339	1.00724	1.63275	7.78016	0.012591	0.0362269	5	12	14	45	22	57	none	hypothetical protein
COO91_07094	1.00706	3.83613	19.6345	0.000366466	0.00194252	70	65	68	194	356	241	kdpD	two-component system, OmpR family, sensor histidine kinase KdpD [EC:2.7.13.3]
COO91_05228	1.00668	3.95359	15.961	0.00100463	0.00457281	71	74	64	234	386	190	none	Plasmid stabilization system protein ParE
COO91_00016	1.00525	1.44925	9.25646	0.00736105	0.0235378	8	7	8	35	19	38	none	hypothetical protein
COO91_00080	1.00525	1.44925	9.25646	0.00736105	0.0235378	8	7	8	35	19	38	none	hypothetical protein
COO91_06866	1.00499	1.2692	8.68528	0.00901967	0.0276804	8	8	13	48	25	43	cysE	serine O-acetyltransferase [EC:2.3.1.30]
COO91_10276	1.00468	5.21355	37.7678	1.08091e-05	9.71738e-05	191	234	221	733	854	948	none	DNA-binding response regulator%2C OmpR family%2C containings REC and winged-helix
COO91_07598	1.00443	3.28876	25.8566	9.19452e-05	0.000597727	38	58	52	185	197	198	urtC	ABC-type urea transport system permease protein
COO91_07154	1.00408	4.98701	46.7569	2.89384e-06	3.09687e-05	140	147	154	577	567	593	none	Replication fork clamp-binding protein CrfC
COO91_01230	1.00195	3.2078	24.0266	0.000134905	0.000825511	35	46	42	172	119	196	none	hypothetical protein
COO91_10569	1.0018	1.54746	8.33454	0.0102464	0.0305639	12	18	12	53	74	36	none	hypothetical protein
COO91_04233	1.00156	4.37393	26.2881	8.42092e-05	0.000554428	137	87	107	425	490	387	none	Mobile element protein
COO91_01126	1.00094	6.22623	86.2837	4.53797e-08	8.99614e-07	487	501	471	2012	1935	1775	none	Molecular chaperone DnaK
COO91_10122	1.00077	1.35844	7.44587	0.0142969	0.0400906	4	18	16	55	46	48	none	putative membrane protein
COO91_04682	0.999875	2.11103	8.62774	0.00920899	0.0281259	9	9	13	37	56	28	none	Phytanoyl-CoA dioxygenase
COO91_08807	0.998664	1.3571	7.54583	0.0137608	0.0388793	8	6	9	31	28	32	ampG	MFS transporter, PAT family, beta-lactamase induction signal transducer AmpG
COO91_07565	0.997391	4.0559	22.7065	0.000179918	0.0010612	93	59	78	277	264	370	none	putative membrane protein
COO91_06368	0.996611	3.35563	26.9449	7.37933e-05	0.000500463	35	49	56	168	187	192	none	Lipopolysaccharide biosynthesis protein%2C LPS:glycosyltransferase
COO91_09762	0.996247	1.63151	6.85627	0.0180005	0.0482296	26	8	21	69	90	57	none	hypothetical protein
COO91_07318	0.99556	3.3973	10.427	0.00493219	0.0169749	15	7	13	38	58	41	none	Resolvase%2C HTH domain
COO91_06973	0.99499	2.63158	9.97303	0.005796	0.0193744	41	30	16	101	148	88	none	Serine/threonine protein kinase
COO91_06378	0.994102	2.81543	21.5158	0.000235345	0.0013471	26	31	28	116	101	116	none	Endonuclease%2C Uma2 family
COO91_09200	0.992939	2.05644	11.8172	0.00314364	0.0116957	26	27	20	93	56	140	none	hypothetical protein
COO91_05545	0.991978	1.71597	7.99884	0.0116003	0.0338349	15	14	19	43	94	48	xisA	site-specific recombinase
COO91_07568	0.991943	5.589	35.9302	1.45432e-05	0.000124748	199	197	219	922	532	983	none	4-hydroxybenzoate polyprenyltransferase
COO91_09728	0.990776	2.53996	16.3649	0.000841397	0.00393667	35	33	18	106	130	97	xerD	integrase/recombinase XerD
COO91_09893	0.989557	3.31907	18.3185	0.000506946	0.00257011	38	35	59	165	195	154	none	23S rRNA-intervening sequence protein
COO91_10305	0.988963	5.72206	54.2963	1.10144e-06	1.3517e-05	263	255	245	977	1101	880	none	Site-specific DNA recombinase related to the DNA invertase Pin
COO91_11068	0.988963	5.72206	54.2963	1.10144e-06	1.3517e-05	263	255	245	977	1101	880	none	Site-specific DNA recombinase related to the DNA invertase Pin
COO91_07151	0.988498	4.39886	38.8538	9.11393e-06	8.34595e-05	107	83	94	335	391	381	none	Molecular chaperone DnaK
COO91_08189	0.98812	5.17398	43.8181	4.35444e-06	4.45066e-05	146	207	183	657	765	645	none	Taurine dioxygenase%2C alpha-ketoglutarate-dependent
COO91_01122	0.987276	1.55632	8.50745	0.0096195	0.0291005	14	27	13	79	47	85	none	hypothetical protein
COO91_08545	0.986752	1.18054	8.28255	0.0104438	0.031005	8	10	7	43	26	29	none	hypothetical protein
COO91_10303	0.986337	5.52714	37.5786	1.1139e-05	9.98915e-05	228	232	241	791	1109	800	none	Type II secretory pathway%2C component ExeA
COO91_11070	0.986337	5.52714	37.5786	1.1139e-05	9.98915e-05	228	232	241	791	1109	800	none	Type II secretory pathway%2C component ExeA
COO91_01519	0.98585	2.14182	17.0454	0.00070275	0.00336276	23	22	16	81	81	75	none	hypothetical protein
COO91_00385	0.984527	1.38763	8.01727	0.0115208	0.0336304	7	5	13	30	31	37	none	Transposase
COO91_00018	0.984337	4.43835	42.2702	5.44462e-06	5.39076e-05	80	101	84	358	268	408	none	Type II secretory pathway%2C component ExeA
COO91_07691	0.984337	4.43835	42.2702	5.44462e-06	5.39076e-05	80	101	84	358	268	408	none	Type II secretory pathway%2C component ExeA
COO91_04594	0.983002	2.81949	12.2793	0.00272138	0.0104012	35	42	23	117	169	96	none	Phosphotransferase system%2C mannose/fructose/N-acetylgalactosamine-specific component IID
COO91_03224	0.982999	3.7584	25.4858	9.92319e-05	0.000637818	57	63	54	247	145	291	none	hypothetical protein
COO91_06081	0.98252	1.46044	8.48443	0.00970039	0.0293206	6	8	6	27	24	27	none	Transposase
COO91_02055	0.981438	2.6046	8.97572	0.00821507	0.0257963	28	12	38	84	124	95	none	Phage protein
COO91_06674	0.9805	1.60275	7.6117	0.0134199	0.0380354	10	13	10	33	53	41	none	Endonuclease%2C Uma2 family
COO91_06363	0.980467	4.64854	47.6444	2.5676e-06	2.80441e-05	84	111	91	395	333	379	msbA	ATP-binding cassette, subfamily B, bacterial MsbA [EC:3.6.3.-]
COO91_06553	0.980361	1.77183	11.7043	0.00325759	0.0120348	15	10	11	46	48	46	none	hypothetical protein
COO91_09838	0.979363	5.39795	32.1452	2.77556e-05	0.000217543	206	243	185	717	1022	677	none	Transposase%2C TnpA family
COO91_09091	0.979176	4.31272	36.5749	1.30895e-05	0.000114075	71	96	81	339	239	387	none	Type II secretory pathway%2C component ExeA
COO91_01934	0.978274	2.17976	9.71956	0.00626704	0.0206309	19	22	17	83	66	76	none	putative ATPase%2C archaeal AAA+ ATPase superfamily
COO91_07156	0.978259	2.36851	8.16531	0.0109962	0.0323784	37	19	11	95	100	64	none	Histidine kinase-like ATPase
COO91_00270	0.977798	2.66947	18.3897	0.000497964	0.00252931	24	31	24	102	79	126	none	RNA:NAD 2'-phosphotransferase
COO91_08753	0.976795	2.12599	10.6818	0.00453257	0.0158056	12	10	16	49	32	68	none	putative kinase%2C aminoglycoside phosphotransferase
COO91_01039	0.976758	1.85597	11.7004	0.00326163	0.0120409	20	19	18	76	89	54	none	hypothetical protein
COO91_04196	0.976285	2.95252	16.2878	0.000858957	0.00400403	35	31	37	133	158	105	pstB	phosphate transport system ATP-binding protein [EC:3.6.3.27]
COO91_00668	0.976248	6.94188	73.8768	1.36219e-07	2.29662e-06	532	539	627	2198	2074	2307	none	DNA-binding response regulator%2C OmpR family%2C containings REC and winged-helix
COO91_07624	0.974325	6.24917	67.983	2.42493e-07	3.77119e-06	331	301	284	1219	1072	1257	none	ABC-type putative transport system involved in gliding motility%2C auxiliary component
COO91_07882	0.973043	2.13209	7.99235	0.0116283	0.0338985	23	14	26	48	114	79	none	Transposase%2C Helix-turn-helix domain
COO91_10193	0.971576	5.35554	32.6293	2.54815e-05	0.00020206	198	237	179	696	974	658	none	Transposase%2C TnpA family
COO91_09717	0.97154	4.93012	24.1992	0.000134637	0.000825511	208	169	189	611	926	623	none	O-Methyltransferase involved in polyketide biosynthesis
COO91_06167	0.970478	3.28201	11.8158	0.00314494	0.0116957	13	26	24	72	98	70	none	Ca2+-binding protein%2C RTX toxin-related
COO91_11093	0.970458	2.36826	13.8309	0.00170756	0.00708963	22	25	18	75	100	73	none	hypothetical protein
COO91_03974	0.970178	3.28248	20.6574	0.0002872	0.00158767	45	47	27	172	146	139	none	Pimeloyl-ACP methyl ester carboxylesterase
COO91_00280	0.969968	3.17767	14.6602	0.00134527	0.00584083	44	42	37	149	193	127	none	Serine/threonine protein kinase
COO91_04087	0.969727	4.18229	30.3012	3.87555e-05	0.000290707	84	96	71	300	366	290	panE	2-dehydropantoate 2-reductase [EC:1.1.1.169]
COO91_03114	0.96919	3.37188	10.1079	0.00615532	0.020329	54	51	59	153	324	141	none	hypothetical protein
COO91_02220	0.968463	3.05871	14.4634	0.00142267	0.00610187	41	49	41	145	229	121	none	Lysophospholipase L1 or related esterase
COO91_02095	0.967728	1.77479	13.1358	0.00209702	0.00837803	17	14	12	59	50	57	none	putative Zn-dependent protease
COO91_07908	0.96771	3.61639	20.5709	0.000293103	0.00161371	51	55	65	158	268	225	none	Transposase%2C Helix-turn-helix domain
COO91_04251	0.967443	5.22525	30.0924	4.02825e-05	0.000300495	228	167	174	730	812	640	none	Peptidoglycan-binding
COO91_07559	0.967359	4.19068	34.6148	1.81044e-05	0.000150624	53	82	59	230	245	265	none	Ca2+-binding protein%2C RTX toxin-related
COO91_00702	0.966791	2.42171	13.5981	0.00182816	0.00750285	22	17	17	76	56	85	cbiGH-cobJ	cobalt-precorrin 5A hydrolase / precorrin-3B C17-methyltransferase [EC:3.7.1.12 2.1.1.131]
COO91_10222	0.965281	2.98949	6.8187	0.0182562	0.048733	12	5	5	35	28	22	none	putative arabinose efflux permease%2C MFS family
COO91_06143	0.965188	2.22793	9.38212	0.00704424	0.0226993	13	13	25	84	59	54	yhbS	putative acetyltransferase [EC:2.3.1.-]
COO91_08316	0.963456	5.6618	19.1329	0.00059133	0.00291597	278	157	162	669	867	752	none	Tetratricopeptide
COO91_08140	0.963228	3.26944	24.2725	0.000128	0.000793509	31	45	47	168	136	168	none	Tetratricopeptide
COO91_05868	0.962906	5.3414	42.1549	5.53733e-06	5.46364e-05	90	84	105	377	303	396	ubiA	4-hydroxybenzoate polyprenyltransferase [EC:2.5.1.39]
COO91_06781	0.961968	2.15305	9.61084	0.00650634	0.0212314	24	15	11	58	52	83	none	GGDEF domain
COO91_02788	0.961451	3.06253	21.44	0.000239475	0.00136354	45	38	44	190	169	127	none	Glycosyltransferase involved in cell wall bisynthesis
COO91_06797	0.960759	4.0413	29.7426	4.29946e-05	0.000317445	70	81	80	250	345	280	none	HigA protein
COO91_09976	0.9603	2.31278	8.5236	0.00956321	0.0289707	31	14	17	68	94	75	none	hypothetical protein
COO91_09632	0.959471	4.45178	29.509	4.49196e-05	0.000329857	44	56	44	177	200	169	none	Chromosome segregation ATPase-like
COO91_01215	0.95944	1.63528	8.39143	0.0100352	0.0300972	9	10	13	46	36	41	none	UDP-N-acetylglucosamine:LPS N-acetylglucosamine transferase
COO91_00889	0.958911	5.96928	33.3849	2.23365e-05	0.000180561	332	393	285	1103	1549	1146	none	IS4 transposase
COO91_09155	0.956575	2.92084	14.2938	0.00149346	0.00634813	34	27	41	120	160	107	none	putative membrane protein
COO91_08498	0.955414	3.19727	24.0734	0.000133559	0.000821387	41	52	29	160	154	148	none	Tetratricopeptide
COO91_11152	0.955075	0.577609	7.61383	0.0134091	0.0380147	6	8	10	34	27	31	none	putative transposase YbfD/YdcC associated with H repeats
COO91_04896	0.953931	2.05218	9.22451	0.00744415	0.0237126	12	18	20	49	75	65	none	mRNA-degrading endonuclease%2C toxin component of the MazEF toxin-antitoxin module
COO91_00402	0.953543	2.40646	15.1051	0.00118705	0.00525076	22	28	31	94	120	92	none	putative protein YjbI%2C containings pentapeptide repeats
COO91_07903	0.952319	6.07923	31.4903	3.25413e-05	0.000248748	363	370	314	1136	1670	1118	none	IS4 transposase
COO91_08339	0.951706	2.34704	11.6555	0.00330838	0.0121927	19	33	11	76	72	90	none	hypothetical protein
COO91_04078	0.951273	1.64191	10.8529	0.00428468	0.0151334	15	10	11	49	38	51	none	hypothetical protein
COO91_08266	0.950669	4.34181	21.3938	0.000242027	0.00137445	141	91	116	357	524	437	none	DNA segregation ATPase FtsK/SpoIIIE
COO91_09858	0.950397	2.59964	10.3684	0.00502959	0.0172443	12	14	20	48	46	82	none	Large exoprotein involved in heme utilization or adhesion
COO91_01181	0.949008	5.82474	35.5591	1.54613e-05	0.00013167	290	282	308	950	1356	1000	none	Type II secretory pathway%2C component ExeA
COO91_10424	0.947588	5.90638	60.4373	5.40079e-07	7.42312e-06	342	326	305	1234	1266	1178	none	Large exoprotein involved in heme utilization or adhesion
COO91_01816	0.946637	3.59013	9.86212	0.00688032	0.0222613	71	47	75	219	329	177	none	methylase RsmC
COO91_01127	0.94641	4.00098	26.9367	7.39134e-05	0.000500964	104	99	101	525	310	325	none	hypothetical protein
COO91_00454	0.945663	4.13733	29.4551	4.53773e-05	0.000332541	78	92	71	280	352	270	none	putative SAM-binding protein YcdF%2C DUF218 family
COO91_04591	0.945431	5.68211	60.6519	5.2735e-07	7.30862e-06	229	257	201	947	844	799	none	DNA-binding response regulator%2C OmpR family%2C containings REC and winged-helix
COO91_09722	0.945007	4.67169	16.2013	0.00107004	0.00482165	135	138	172	442	760	457	none	Tetratricopeptide
COO91_10677	0.943138	2.87607	16.0921	0.000905385	0.00417906	32	41	33	133	123	144	none	hypothetical protein
COO91_02149	0.943078	2.96911	9.83979	0.00610739	0.0201913	33	27	50	104	187	121	rfbC	dTDP-4-dehydrorhamnose 3,5-epimerase
COO91_07958	0.942167	1.79283	8.27411	0.0104763	0.0310928	22	15	9	58	47	70	pcyA	phycocyanobilin:ferredoxin oxidoreductase [EC:1.3.7.5]
COO91_04190	0.941351	1.77128	9.18876	0.00753838	0.0239423	14	15	18	63	76	37	none	putative membrane protein YckC%2C RDD family
COO91_06365	0.941254	4.18939	26.6185	7.87769e-05	0.000526671	78	91	89	272	345	351	none	putative glycosyl transferase
COO91_02898	0.941082	4.24499	37.1721	1.18869e-05	0.00010452	79	94	98	346	322	354	none	Chromosome segregation ATPase
COO91_06927	0.940786	2.84282	9.78026	0.00618742	0.0204123	46	27	27	113	169	92	yaeR	glyoxylase I family protein
COO91_03486	0.939573	5.55547	24.6983	0.000130182	0.000805197	249	266	336	1122	1155	920	none	protein of unknown function DUF4394
COO91_01582	0.93809	2.33309	13.1031	0.00211766	0.00843635	24	21	21	85	80	84	none	hypothetical protein
COO91_10702	0.937376	2.24227	10.9582	0.00413973	0.0146961	16	22	18	52	61	98	none	Peroxiredoxin
COO91_01848	0.937063	2.44658	13.262	0.00201945	0.008141	30	15	26	96	88	85	parD1_3_4	antitoxin ParD1/3/4
COO91_02747	0.936608	4.88803	37.4282	1.14093e-05	0.000101809	127	153	146	552	585	453	phnD	phosphonate transport system substrate-binding protein
COO91_08948	0.935947	4.57672	23.3682	0.000155545	0.000936903	60	117	106	362	271	432	none	Glycosyltransferase involved in cell wall bisynthesis
COO91_11191	0.93577	2.58676	9.04399	0.00793405	0.0250666	23	34	26	125	61	129	none	hypothetical protein
COO91_02994	0.935631	2.23322	18.543	0.000479213	0.00244554	20	21	25	90	75	84	none	hypothetical protein
COO91_06543	0.934582	4.48115	33.8467	2.06298e-05	0.000167892	96	132	88	419	415	341	none	UDP:flavonoid glycosyltransferase YjiC%2C YdhE family
COO91_11180	0.934389	4.09593	28.9355	5.00673e-05	0.000362155	87	113	89	330	409	334	none	Tetratricopeptide
COO91_07382	0.934293	4.1345	28.1129	5.86443e-05	0.00041299	88	94	78	350	268	362	none	Ca2+-binding protein%2C RTX toxin-related
COO91_10772	0.934281	8.04358	60.6387	5.28123e-07	7.30998e-06	1082	1278	1226	4322	4851	4190	none	Ca2+-binding protein%2C RTX toxin-related
COO91_00685	0.934216	1.5522	9.79085	0.00611551	0.020212	8	12	10	34	45	33	ssuD	alkanesulfonate monooxygenase [EC:1.14.14.5]
COO91_02428	0.933211	7.45132	31.5123	3.75964e-05	0.000283584	503	542	562	1825	2546	1577	ABC-2.OM	polysaccharide export outer membrane protein
COO91_01024	0.931777	5.98693	57.0496	7.94259e-07	1.02959e-05	301	342	296	1157	1248	1090	none	Site-specific DNA recombinase related to the DNA invertase Pin
COO91_01813	0.930678	1.81489	8.82824	0.00856803	0.0265808	23	22	11	53	93	61	none	hypothetical protein
COO91_09530	0.930118	6.42202	78.3763	8.9924e-08	1.60617e-06	427	489	409	1588	1503	1865	none	hypothetical protein
COO91_07239	0.929889	4.81558	44.4866	3.96095e-06	4.09488e-05	138	156	138	534	524	555	none	Endonuclease%2C Uma2 family
COO91_09759	0.92988	1.99849	12.9424	0.00222254	0.00879266	17	25	23	75	67	102	none	hypothetical protein
COO91_00426	0.929533	3.92747	17.4788	0.000627882	0.00306222	70	86	70	202	363	267	none	Methyl-accepting chemotaxis protein
COO91_08604	0.929378	2.30779	13.4006	0.00193795	0.00789177	16	22	15	64	52	83	none	WGR domain%2C putative DNA-binding domain in MolR
COO91_05974	0.929008	2.28814	17.939	0.000558034	0.00278687	19	20	17	67	63	80	none	Ketosteroid isomerase
COO91_03688	0.926947	5.88897	62.0249	4.53426e-07	6.46625e-06	274	269	288	1085	1021	999	bioB	biotin synthase [EC:2.8.1.6]
COO91_06902	0.92636	3.39943	19.0353	0.000424142	0.00220717	53	35	48	179	152	181	none	Glycosyltransferase%2C GT2 family
COO91_00836	0.925258	2.75452	12.1621	0.00282209	0.01069	27	40	36	102	171	105	none	Transposase%2C IS5 family
COO91_09466	0.925132	2.26922	14.8665	0.00126913	0.00555455	18	26	13	72	66	74	none	MFS family permease
COO91_04777	0.923432	6.04296	57.1095	7.88746e-07	1.0249e-05	295	320	279	1025	1129	1163	none	hypothetical protein
COO91_01069	0.923031	1.40192	7.66634	0.0131445	0.0374214	10	17	9	59	29	47	none	hypothetical protein
COO91_02449	0.92195	6.10658	48.839	2.19152e-06	2.44547e-05	260	246	320	1078	1038	963	none	Tetratricopeptide
COO91_06984	0.921503	5.25045	36.4766	1.33004e-05	0.000115726	183	219	154	664	735	651	none	Nucleotide-binding universal stress protein%2C UspA family
COO91_09950	0.921432	3.67875	29.7373	4.30374e-05	0.000317544	76	71	64	254	239	294	none	hypothetical protein
COO91_05789	0.921005	4.72726	24.02	0.000135095	0.000825672	119	162	127	475	599	422	none	Sensor protein KdpD%2C transmembrane domain
COO91_09172	0.92018	2.04088	12.0424	0.00292923	0.0110167	15	24	16	58	84	60	parA	chromosome partitioning protein
COO91_05369	0.920043	4.00855	16.5054	0.000810427	0.00381228	86	59	67	260	322	202	none	Signal transduction histidine kinase
COO91_00673	0.919906	1.65531	8.83016	0.00856214	0.0265778	7	17	16	43	52	53	none	SAM-dependent methyltransferase
COO91_00894	0.919731	1.84861	7.62759	0.0133392	0.0378661	16	14	21	49	75	65	none	DNA-binding response regulator%2C OmpR family%2C containings REC and winged-helix
COO91_01907	0.917769	2.51806	11.0189	0.00405861	0.0144516	23	33	13	106	79	70	none	hypothetical protein
COO91_09124	0.917377	5.02019	27.0545	7.22e-05	0.000491196	188	186	181	582	858	595	parA	chromosome partitioning protein
COO91_02153	0.916586	4.39806	20.0313	0.000333123	0.00179568	65	68	84	314	260	232	none	Nucleoside-diphosphate-sugar epimerase
COO91_09932	0.916329	8.38249	63.2572	3.96843e-07	5.78898e-06	1445	1657	1535	5394	6082	5604	none	Ca2+-binding protein%2C RTX toxin-related
COO91_09729	0.916286	3.27856	15.092	0.00119141	0.00526359	77	56	41	205	238	200	recD	exodeoxyribonuclease V alpha subunit [EC:3.1.11.5]
COO91_07567	0.916222	4.84158	22.6523	0.000182097	0.00107004	124	127	142	609	288	584	none	HAD-superfamily phosphatase%2C YqeG-like
COO91_09973	0.915084	2.4357	12.2821	0.00271904	0.0103959	25	26	32	138	72	101	none	hypothetical protein
COO91_09634	0.914598	5.59355	46.7528	2.89545e-06	3.09687e-05	142	154	188	617	541	641	none	Lhr-like helicase
COO91_06415	0.914506	4.95625	33.2945	2.2689e-05	0.000183	149	140	163	497	533	648	ABC-2.LPSE.P	lipopolysaccharide transport system permease protein
COO91_10935	0.914054	2.38808	11.089	0.00396734	0.0141897	16	18	33	86	70	94	none	23S rRNA-intervening sequence protein
COO91_07109	0.913917	4.2476	25.9997	8.92936e-05	0.00058294	74	81	73	242	321	274	none	hypothetical protein
COO91_02859	0.9137	6.20082	44.9112	3.73178e-06	3.89892e-05	343	293	301	1070	1002	1419	none	hypothetical protein
COO91_10436	0.912861	4.35207	28.0353	5.95352e-05	0.000417904	93	111	123	381	470	348	none	hypothetical protein
COO91_02135	0.912689	2.05081	7.30511	0.0150926	0.0419093	19	10	19	86	35	60	none	Glycosyltransferase involved in cell wall bisynthesis
COO91_03781	0.912454	6.34848	35.0218	1.69078e-05	0.000141978	436	582	399	1528	1983	1651	apcB	allophycocyanin beta subunit
COO91_01261	0.911051	1.90682	10.5375	0.00475419	0.016467	20	12	18	66	69	50	none	AraC-type DNA-binding domain and AraC-containing proteins
COO91_04947	0.910179	3.62679	13.0119	0.00221775	0.00878014	58	80	72	213	365	181	plsC	1-acyl-sn-glycerol-3-phosphate acyltransferase [EC:2.3.1.51]
COO91_01915	0.90968	1.4027	7.7396	0.0127852	0.0366652	7	12	13	44	41	33	none	hypothetical protein
COO91_10587	0.907729	2.53601	8.24816	0.0105768	0.0313482	17	18	9	58	65	38	none	hypothetical protein
COO91_08919	0.907724	1.2589	8.65285	0.00912584	0.0279113	8	12	13	43	37	42	none	putative transposase YbfD/YdcC associated with H repeats
COO91_09681	0.907712	2.77744	20.0698	0.000330067	0.00178187	26	41	28	109	116	123	none	Site-specific DNA recombinase related to the DNA invertase Pin
COO91_09139	0.907503	6.06321	28.8178	5.27711e-05	0.00037873	352	341	372	1123	1654	1103	none	Type II secretory pathway%2C component ExeA
COO91_01581	0.906426	1.49936	9.47394	0.0068225	0.0220985	9	15	11	40	50	38	none	hypothetical protein
COO91_09165	0.906401	6.06226	28.7401	5.35563e-05	0.000382889	352	341	372	1121	1653	1103	none	Type II secretory pathway%2C component ExeA
COO91_09471	0.905718	4.69068	35.3253	1.60729e-05	0.000136343	128	127	127	406	529	462	none	Non-ribosomal peptide synthetase component F
COO91_02150	0.905335	3.26022	15.7854	0.000983949	0.00449758	50	38	46	149	204	137	none	Ectoine hydroxylase-related dioxygenase%2C phytanoyl-CoA dioxygenase
COO91_06728	0.905179	3.85178	26.5074	8.05582e-05	0.000534618	56	76	62	253	186	277	ancrpA	transcriptional regulator
COO91_01552	0.90474	1.49476	9.61483	0.00649738	0.0212086	14	10	11	43	34	53	none	hypothetical protein
COO91_11209	0.90397	4.17889	30.3482	3.84204e-05	0.000288994	85	92	104	377	271	393	none	Superfamily II DNA or RNA helicase%2C SNF2 family
COO91_00006	0.903943	5.95258	31.4282	3.1553e-05	0.000242439	325	310	347	1048	1478	1050	none	Type II secretory pathway%2C component ExeA
COO91_00070	0.903943	5.95258	31.4282	3.1553e-05	0.000242439	325	310	347	1048	1478	1050	none	Type II secretory pathway%2C component ExeA
COO91_01015	0.903943	5.95258	31.4282	3.1553e-05	0.000242439	325	310	347	1048	1478	1050	none	Type II secretory pathway%2C component ExeA
COO91_01333	0.903943	5.95258	31.4282	3.1553e-05	0.000242439	325	310	347	1048	1478	1050	none	Type II secretory pathway%2C component ExeA
COO91_01870	0.903943	5.95258	31.4282	3.1553e-05	0.000242439	325	310	347	1048	1478	1050	none	Type II secretory pathway%2C component ExeA
COO91_01120	0.90356	5.95192	31.4058	3.16804e-05	0.000243198	325	310	347	1047	1478	1050	none	Type II secretory pathway%2C component ExeA
COO91_10744	0.902725	1.74668	8.19867	0.0107716	0.0318428	15	12	7	52	31	43	none	DNA primase
COO91_07956	0.902094	4.46132	33.5875	2.15689e-05	0.000174878	106	142	90	428	413	390	none	DNA-binding response regulator%2C OmpR family%2C containings REC and winged-helix
COO91_10474	0.90064	4.13139	29.7959	4.25687e-05	0.000315375	92	96	74	289	300	371	parA	chromosome partitioning protein
COO91_04691	0.899122	3.59327	25.569	9.75417e-05	0.000629196	48	62	45	180	206	177	none	hypothetical protein
COO91_11146	0.899049	1.99312	12.3838	0.00263502	0.0101671	15	17	16	65	57	54	LDH	L-lactate dehydrogenase [EC:1.1.1.27]
COO91_07685	0.898977	2.83103	8.30253	0.0106025	0.0314086	32	38	35	114	163	103	none	Transposase
COO91_04294	0.898871	1.96944	8.39796	0.0100112	0.0300337	20	18	16	64	55	80	none	hypothetical protein
COO91_02000	0.898628	3.63331	21.2497	0.000250203	0.00141346	45	46	56	194	140	209	none	hypothetical protein
COO91_06555	0.898576	2.50711	11.9122	0.00305109	0.0113958	21	22	29	90	58	119	none	hypothetical protein
COO91_10265	0.898082	2.72866	10.3883	0.00499631	0.0171574	30	29	21	89	112	90	cpeA	phycoerythrin alpha chain
COO91_04778	0.897536	7.91247	24.4754	0.000186395	0.00109233	1182	1199	1123	3608	5625	3386	none	Type IV secretory pathway%2C VirB4 component
COO91_10302	0.89533	1.97379	11.2539	0.00376133	0.0135935	21	21	15	73	60	76	none	WD40 repeat
COO91_09311	0.895099	4.69217	43.3658	4.64539e-06	4.73463e-05	108	125	108	426	350	473	none	Type II secretory pathway%2C component ExeA
COO91_11147	0.894026	4.02784	11.3114	0.00421505	0.0149243	97	104	70	302	462	205	none	hypothetical protein
COO91_10219	0.89166	3.63113	14.8938	0.00125943	0.00552351	71	44	65	192	269	193	none	Mobile element protein
COO91_09002	0.891557	4.95579	26.6852	7.77281e-05	0.00052162	177	191	158	608	776	509	folC	dihydrofolate synthase / folylpolyglutamate synthase [EC:6.3.2.12 6.3.2.17]
COO91_06484	0.891401	1.63696	6.99838	0.017007	0.0461017	7	16	17	50	54	41	none	hypothetical protein
COO91_10594	0.89125	1.89289	8.64488	0.00915214	0.0279759	27	18	13	61	58	94	none	Transcriptional regulator%2C containings XRE-family HTH domain
COO91_00691	0.890918	2.78926	10.3692	0.00502828	0.0172443	26	36	19	105	72	119	none	Phosphoglycerate dehydrogenase or related dehydrogenase
COO91_01854	0.890712	2.56074	12.0967	0.00288014	0.0108622	29	20	29	104	98	83	none	Formylglycine-generating enzyme%2C required for sulfatase activity%2C containings SUMF1/FGE domain
COO91_01466	0.890125	5.32832	39.5712	8.15779e-06	7.59896e-05	167	128	139	578	448	568	none	Beta-phosphoglucomutase or related phosphatase%2C HAD superfamily
COO91_09736	0.889605	3.47946	18.0166	0.000547139	0.00273898	61	48	50	167	207	204	none	Type IV secretory pathway%2C VirB4 component
COO91_08009	0.88939	2.06634	6.75481	0.0187252	0.0498726	19	8	28	69	67	66	none	hypothetical protein
COO91_09585	0.888638	2.41467	13.8579	0.00169416	0.00704639	24	24	14	78	76	71	none	Murein DD-endopeptidase MepM and murein hydrolase activator NlpD%2C containing LysM domain
COO91_00004	0.888547	6.06637	50.4363	1.78135e-06	2.04252e-05	327	364	320	1220	1315	1117	none	Site-specific DNA recombinase
COO91_00053	0.888547	6.06637	50.4363	1.78135e-06	2.04252e-05	327	364	320	1220	1315	1117	none	Site-specific DNA recombinase related to the DNA invertase Pin
COO91_00068	0.888547	6.06637	50.4363	1.78135e-06	2.04252e-05	327	364	320	1220	1315	1117	none	Site-specific DNA recombinase related to the DNA invertase Pin
COO91_01013	0.888547	6.06637	50.4363	1.78135e-06	2.04252e-05	327	364	320	1220	1315	1117	none	Site-specific DNA recombinase related to the DNA invertase Pin
COO91_01178	0.888547	6.06637	50.4363	1.78135e-06	2.04252e-05	327	364	320	1220	1315	1117	none	Site-specific DNA recombinase related to the DNA invertase Pin
COO91_01335	0.888547	6.06637	50.4363	1.78135e-06	2.04252e-05	327	364	320	1220	1315	1117	none	Site-specific DNA recombinase related to the DNA invertase Pin
COO91_01872	0.888547	6.06637	50.4363	1.78135e-06	2.04252e-05	327	364	320	1220	1315	1117	none	Site-specific DNA recombinase related to the DNA invertase Pin
COO91_03441	0.888547	6.06637	50.4363	1.78135e-06	2.04252e-05	327	364	320	1220	1315	1117	none	Site-specific DNA recombinase related to the DNA invertase Pin
COO91_09847	0.888389	2.88387	7.31296	0.0155686	0.0429883	31	27	35	79	178	75	none	hypothetical protein
COO91_02380	0.888288	5.5233	27.9141	6.09568e-05	0.00042595	278	219	231	833	1019	784	none	Parvulin-like peptidyl-prolyl isomerase
COO91_10900	0.888166	4.69598	44.4534	3.97957e-06	4.10628e-05	123	139	109	474	393	483	aroA	3-phosphoshikimate 1-carboxyvinyltransferase [EC:2.5.1.19]
COO91_08454	0.887814	3.03231	18.5852	0.000474188	0.00242448	38	38	48	125	160	165	none	Triacylglycerol esterase/lipase EstA%2C alpha/beta hydrolase fold
COO91_10241	0.886913	5.09228	33.2659	2.28015e-05	0.00018349	79	106	73	299	277	359	none	LysM repeat
COO91_09130	0.886524	6.16595	44.7624	3.81036e-06	3.95811e-05	351	400	342	1301	1468	1165	none	Site-specific DNA recombinase related to the DNA invertase Pin
COO91_09141	0.886524	6.16595	44.7624	3.81036e-06	3.95811e-05	351	400	342	1301	1468	1165	none	Site-specific DNA recombinase related to the DNA invertase Pin
COO91_09163	0.886524	6.16595	44.7624	3.81036e-06	3.95811e-05	351	400	342	1301	1468	1165	none	Site-specific DNA recombinase related to the DNA invertase Pin
COO91_11113	0.886424	7.66684	61.6326	4.73293e-07	6.72299e-06	938	956	1007	3491	3679	3335	none	IS4 transposase
COO91_10759	0.885667	7.66687	61.4776	4.81411e-07	6.8026e-06	938	956	1008	3490	3680	3333	none	IS4 transposase
COO91_06174	0.885598	4.30519	24.8516	0.000113245	0.0007164	75	68	69	263	279	225	argJ_2	glutamate N-acetyltransferase / amino-acid N-acetyltransferase [EC:2.3.1.35 2.3.1.1]
COO91_09412	0.88525	2.29562	7.76069	0.0126838	0.0364453	22	25	19	89	70	81	none	putative ATPase%2C archaeal AAA+ ATPase superfamily
COO91_05077	0.884994	2.49791	9.47368	0.00682311	0.0220985	21	32	12	86	90	57	none	hypothetical protein
COO91_02363	0.884649	2.34012	10.4815	0.0048435	0.0167362	29	28	20	78	121	77	none	hypothetical protein
COO91_00881	0.884593	1.35988	7.54928	0.0137427	0.0388384	8	15	7	30	41	37	none	hypothetical protein
COO91_04074	0.882336	2.25565	13.0817	0.00213131	0.00847512	24	27	23	72	84	112	none	hypothetical protein
COO91_01025	0.881695	5.86036	62.5625	4.27705e-07	6.18088e-06	271	288	306	1062	982	1091	none	Transposase
COO91_07733	0.88158	3.90691	16.3188	0.000851847	0.00397945	54	73	54	257	125	280	none	Type II secretory pathway%2C component ExeA
COO91_09763	0.880748	4.44028	18.1515	0.000528751	0.00265948	158	101	128	378	560	458	none	DNA segregation ATPase FtsK/SpoIIIE
COO91_08471	0.879505	3.28417	11.6002	0.00336697	0.0123833	52	50	62	176	244	168	none	hypothetical protein
COO91_08067	0.878967	1.86856	9.1132	0.00774205	0.0245029	12	27	15	73	61	60	none	Ribosomal protein S18 acetylase RimI and related acetyltransferases
COO91_01514	0.876808	7.48856	45.0247	3.67307e-06	3.84501e-05	1006	1239	888	3741	3635	3859	cpcA	C-phycocyanin alpha subunit
COO91_10239	0.875099	4.77912	9.9613	0.00620758	0.0204663	32	31	28	87	148	89	none	putative ATPase
COO91_06849	0.875036	2.36945	9.64079	0.0064394	0.0210511	18	26	23	84	98	57	none	ABC-type oligopeptide transport system%2C ATPase component
COO91_01997	0.873787	5.27801	18.9006	0.000496461	0.00252379	246	223	251	785	1146	628	none	Ca2+-binding protein%2C RTX toxin-related
COO91_00596	0.873515	6.13608	34.87	1.73433e-05	0.000145184	370	430	334	1190	1598	1240	none	IS4 transposase
COO91_07234	0.873126	2.68895	13.7425	0.00175225	0.0072446	26	27	43	111	117	118	none	hypothetical protein
COO91_09966	0.873042	3.13875	18.3191	0.00050687	0.00257011	33	48	36	130	146	142	none	Glycosaminoglycan attachment site
COO91_03108	0.871979	6.13674	34.6581	1.79725e-05	0.000149672	370	431	334	1190	1598	1239	none	IS4 transposase
COO91_01066	0.871529	3.37964	16.3664	0.000841055	0.00393667	53	60	70	198	238	219	none	Tetratricopeptide
COO91_09607	0.870743	3.15958	17.6905	0.000594601	0.00292677	42	53	55	175	202	158	none	hypothetical protein
COO91_06960	0.870098	3.64659	22.6544	0.000182013	0.00107004	59	67	40	195	171	230	anmK	anhydro-N-acetylmuramic acid kinase [EC:2.7.1.170]
COO91_06909	0.868886	4.4159	26.7374	7.69193e-05	0.000517811	71	92	111	374	306	304	none	Serine/threonine protein kinase
COO91_09024	0.868616	1.52555	7.4951	0.01403	0.0395058	9	13	15	51	42	40	menC	O-succinylbenzoic acid synthase
COO91_07713	0.868391	1.54449	10.0357	0.00562568	0.0188931	13	14	15	52	48	51	none	Lysophospholipase%2C alpha-beta hydrolase superfamily
COO91_02072	0.867355	4.17715	23.5662	0.000148989	0.000901428	106	99	104	339	431	330	E4.3.1.19	threonine dehydratase [EC:4.3.1.19]
COO91_11178	0.867234	4.19232	21.2538	0.000249962	0.00141287	80	120	60	320	249	360	none	Tetratricopeptide
COO91_09790	0.867085	1.53176	10.3079	0.0051325	0.0175471	15	20	15	55	67	56	none	biosynthesis of stilbenes%2C flavonoids
COO91_02154	0.866546	5.33989	40.8927	6.67635e-06	6.38947e-05	136	156	128	536	445	524	lhgO	L-2-hydroxyglutarate oxidase [EC:1.1.3.-]
COO91_08458	0.8664	2.11439	10.535	0.00475809	0.0164752	18	26	23	69	72	99	none	Formylglycine-generating enzyme%2C required for sulfatase activity%2C containings SUMF1/FGE domain
COO91_01423	0.865578	3.82306	14.8242	0.00128434	0.00560662	60	67	64	210	299	165	none	hypothetical protein
COO91_08143	0.865327	7.95175	69.2023	2.14519e-07	3.40463e-06	1140	1165	1209	4267	4271	4016	none	IS4 transposase
COO91_03457	0.865108	7.95168	69.1536	2.15565e-07	3.41122e-06	1140	1165	1209	4265	4271	4016	none	IS4 transposase
COO91_08683	0.86503	6.1298	50.4871	1.7698e-06	2.04252e-05	259	312	257	928	860	1175	none	Fatty acid desaturase
COO91_00095	0.864795	7.95228	69.0505	2.17797e-07	3.44096e-06	1140	1165	1210	4266	4271	4016	none	IS4 transposase
COO91_08427	0.864725	7.95175	69.1624	2.15375e-07	3.41122e-06	1140	1166	1209	4265	4271	4016	none	IS4 transposase
COO91_09138	0.864592	8.05495	63.5234	3.85685e-07	5.64142e-06	1227	1284	1295	4559	4788	4213	none	IS4 transposase
COO91_01501	0.864589	7.95219	69.0054	2.18782e-07	3.442e-06	1141	1165	1210	4266	4271	4018	none	IS4 transposase
COO91_00001	0.864142	5.91231	62.2888	4.40591e-07	6.32487e-06	281	301	303	1096	952	1124	none	Transposase
COO91_07460	0.86395	2.00021	8.7064	0.00895127	0.0275173	16	16	12	68	34	57	none	hypothetical protein
COO91_00206	0.863924	3.63967	16.9833	0.000714281	0.00341341	58	63	47	173	240	181	none	Phosphoethanolamine transferase for periplasmic glucans
COO91_09159	0.863773	8.0555	63.5236	3.85679e-07	5.64142e-06	1227	1286	1296	4562	4786	4215	none	IS4 transposase
COO91_01182	0.863412	7.95265	68.871	2.21746e-07	3.48356e-06	1142	1167	1210	4267	4272	4016	none	IS4 transposase
COO91_06046	0.862814	5.55053	40.8465	6.72283e-06	6.42826e-05	115	125	95	373	407	411	none	Beta-glucanase%2C GH16 family
COO91_03222	0.86239	4.03772	35.1277	1.66111e-05	0.000139921	85	90	93	310	276	375	none	Chaperone protein DnaK
COO91_10527	0.860517	6.79145	57.444	7.58688e-07	9.92991e-06	427	457	463	1571	1631	1590	none	Ca2+-binding protein%2C RTX toxin-related
COO91_07732	0.860484	5.91709	61.3893	4.861e-07	6.85097e-06	282	301	305	1096	953	1126	none	Transposase
COO91_07994	0.859943	2.74453	11.8354	0.00312562	0.011646	30	36	20	111	75	122	none	Peroxiredoxin
COO91_10306	0.859435	5.71433	56.8108	8.167e-07	1.05489e-05	246	261	271	962	862	953	none	Transposase
COO91_11067	0.859435	5.71433	56.8108	8.167e-07	1.05489e-05	246	261	271	962	862	953	none	Transposase
COO91_08503	0.858728	2.90994	14.7848	0.00129868	0.00565443	36	29	41	108	114	158	none	ATPase involved in DNA repair
COO91_03546	0.857955	4.02941	8.57627	0.011126	0.0326805	94	102	83	268	489	214	none	Thiamin phosphate synthase YjbQ%2C UPF0047 family
COO91_01123	0.857648	3.40337	24.3273	0.000126514	0.000785041	74	72	76	284	214	298	none	hypothetical protein
COO91_07558	0.856869	7.47054	61.0946	5.0214e-07	7.04949e-06	772	836	768	2655	2792	2984	none	Ca2+-binding protein%2C RTX toxin-related
COO91_06684	0.856019	6.59643	60.4318	5.40412e-07	7.42312e-06	373	418	394	1480	1224	1520	none	Carbohydrate-selective porin OprB
COO91_00019	0.855507	5.92521	60.9697	5.09109e-07	7.08303e-06	284	302	307	1097	956	1129	none	Transposase
COO91_07692	0.855507	5.92521	60.9697	5.09109e-07	7.08303e-06	284	302	307	1097	956	1129	none	Transposase
COO91_07336	0.854981	3.29523	19.661	0.000364126	0.00193486	53	46	49	155	196	173	none	hypothetical protein
COO91_02535	0.85453	5.84433	21.6796	0.000249967	0.00141287	293	355	292	1006	1400	878	PRK	phosphoribulokinase [EC:2.7.1.19]
COO91_05107	0.854003	4.07492	12.2125	0.00297213	0.0111503	56	143	98	373	336	333	HMOX	heme oxygenase (biliverdin-producing) [EC:1.14.14.18]
COO91_10514	0.853882	2.46063	6.93744	0.0174195	0.046961	33	23	17	66	122	68	none	hypothetical protein
COO91_07799	0.852472	2.39607	8.65638	0.0091142	0.0278915	29	22	23	84	98	80	ABC.X2.A	putative ABC transport system ATP-binding protein
COO91_07542	0.851338	2.24474	6.97204	0.0171839	0.0464881	22	13	18	55	49	86	none	Nucleotide-diphospho-sugar transferases
COO91_00908	0.85074	3.01755	20.8093	0.000277162	0.00153688	36	48	35	130	126	165	none	Transposase
COO91_06871	0.849698	3.51346	18.0605	0.000541074	0.00271515	46	66	39	190	156	187	none	putative protein YjbI%2C containings pentapeptide repeats
COO91_07886	0.849596	1.55484	6.86209	0.0179452	0.0481385	9	10	7	33	33	26	none	Spore coat polysaccharide biosynthesis protein SpsF%2C cytidylyltransferase family
COO91_08231	0.848589	2.56373	13.1419	0.00209322	0.00836671	20	30	26	105	89	74	none	Formylglycine-generating enzyme%2C required for sulfatase activity%2C containings SUMF1/FGE domain
COO91_03889	0.848278	3.07455	10.2894	0.00516441	0.0176173	38	29	38	94	118	161	none	hypothetical protein
COO91_04261	0.848159	4.89347	26.4662	8.1231e-05	0.000537764	139	150	111	476	377	567	murD	UDP-N-acetylmuramoylalanine--D-glutamate ligase [EC:6.3.2.9]
COO91_01850	0.84796	3.6638	17.9036	0.000563079	0.00280736	62	49	65	223	157	250	none	PIN domain nuclease%2C a component of toxin-antitoxin system
COO91_09882	0.84712	2.47558	11.295	0.00371189	0.0134733	32	39	24	110	132	90	none	hypothetical protein
COO91_07538	0.845957	3.26967	15.2734	0.00113276	0.00505401	35	39	35	112	129	143	hlpA	similar to hemolytic protein HlpA
COO91_03492	0.84485	3.02676	7.04306	0.0175659	0.04725	42	32	53	134	214	95	none	Permeases of the major facilitator superfamily
COO91_01556	0.844222	3.34633	18.0164	0.000547169	0.00273898	54	50	53	174	219	157	ybgC	acyl-CoA thioester hydrolase [EC:3.1.2.-]
COO91_07626	0.844213	4.82032	23.99	0.000135967	0.000830068	85	127	137	421	416	388	ABC-2.P	ABC-2 type transport system permease protein
COO91_10357	0.843979	4.4794	17.2482	0.000666536	0.0032208	53	86	81	213	313	239	none	Large exoprotein involved in heme utilization or adhesion
COO91_07536	0.843609	3.25647	15.4874	0.00106768	0.00481322	35	37	35	114	123	140	none	Glycosyltransferase involved in cell wall bisynthesis
COO91_06515	0.84298	3.44377	12.5288	0.00252023	0.00978443	35	49	40	150	89	202	rps21 rps21B	30S ribosomal protein S21
COO91_04475	0.842354	5.35429	32.222	2.73801e-05	0.000215223	173	216	150	588	642	654	hemA	glutamyl tRNA reductase
COO91_09582	0.841348	3.1873	16.6336	0.00078329	0.00369748	41	44	46	150	178	130	none	Esterase/lipase
COO91_10427	0.839723	7.99834	55.9022	9.0881e-07	1.15187e-05	1162	1330	1362	4704	4644	4151	none	putative ATPase
COO91_10718	0.839647	2.3903	12.4486	0.00258304	0.00998886	22	24	21	87	51	100	none	hypothetical protein
COO91_07169	0.83937	2.00244	9.39798	0.00700535	0.0225941	25	21	16	84	63	72	none	DNA-binding response regulator%2C OmpR family%2C containings REC and winged-helix
COO91_10510	0.839137	8.64181	13.8972	0.00266991	0.0102588	2275	2114	2189	6587	10567	5590	none	hypothetical protein
COO91_03760	0.838485	6.21362	40.541	7.03888e-06	6.69063e-05	372	382	316	1067	1317	1354	atpF	F-type H+-transporting ATPase subunit b
COO91_10242	0.838244	6.44263	39.1232	8.74089e-06	8.0589e-05	266	274	245	937	931	881	none	Tetratricopeptide
COO91_10337	0.838145	2.99241	9.87056	0.00595098	0.0198256	34	19	48	108	123	126	none	protein of unknown function DUF4397
COO91_00395	0.837927	3.75916	14.0119	0.00161997	0.00678318	105	83	72	287	377	241	none	putative kinase%2C aminoglycoside phosphotransferase
COO91_03327	0.836158	3.77272	15.3489	0.0011093	0.00496161	67	99	59	303	170	320	none	hypothetical protein
COO91_09689	0.83607	6.05863	26.5644	7.96386e-05	0.00053014	367	344	383	1115	1582	1103	none	Type II secretory pathway%2C component ExeA
COO91_09756	0.83607	6.05863	26.5644	7.96386e-05	0.00053014	367	344	383	1115	1582	1103	none	Type II secretory pathway%2C component ExeA
COO91_09898	0.83607	6.05863	26.5644	7.96386e-05	0.00053014	367	344	383	1115	1582	1103	none	Type II secretory pathway%2C component ExeA
COO91_09953	0.83607	6.05863	26.5644	7.96386e-05	0.00053014	367	344	383	1115	1582	1103	none	Type II secretory pathway%2C component ExeA
COO91_08898	0.835302	1.80757	9.6887	0.00633394	0.0207942	18	20	11	59	61	51	none	hypothetical protein
COO91_09691	0.83524	6.13273	42.3718	5.36442e-06	5.3368e-05	358	391	341	1271	1391	1130	none	Site-specific DNA recombinase related to the DNA invertase Pin
COO91_09754	0.83524	6.13273	42.3718	5.36442e-06	5.3368e-05	358	391	341	1271	1391	1130	none	Site-specific DNA recombinase related to the DNA invertase Pin
COO91_09900	0.83524	6.13273	42.3718	5.36442e-06	5.3368e-05	358	391	341	1271	1391	1130	none	Site-specific DNA recombinase related to the DNA invertase Pin
COO91_09955	0.83524	6.13273	42.3718	5.36442e-06	5.3368e-05	358	391	341	1271	1391	1130	none	Site-specific DNA recombinase related to the DNA invertase Pin
COO91_00560	0.835226	1.69277	7.84459	0.0122895	0.0355103	12	9	17	49	43	42	none	3'%2C5'-cyclic AMP phosphodiesterase CpdA
COO91_06786	0.835057	3.84709	27.9075	6.10346e-05	0.000426218	65	71	53	218	220	222	ada	AraC family transcriptional regulator, regulatory protein of adaptative response / methylated-DNA-[protein]-cysteine methyltransferase [EC:2.1.1.63]
COO91_09962	0.834677	2.54475	11.2114	0.00381323	0.0137444	26	24	19	71	87	83	none	Serine/threonine protein kinase
COO91_09187	0.833653	4.31992	25.0887	0.000107762	0.000686532	77	116	98	356	282	381	none	hypothetical protein
COO91_00176	0.833503	3.66962	16.2758	0.000861727	0.00401176	43	58	65	159	199	221	none	putative membrane protein
COO91_01297	0.833482	1.99928	7.58843	0.0135392	0.0383134	11	27	18	69	51	76	none	Tetratricopeptide
COO91_00667	0.832922	3.7695	24.0236	0.000134992	0.000825511	72	64	67	234	226	252	none	DNA-binding transcriptional regulator YiaG%2C XRE-type HTH domain
COO91_07203	0.832014	4.65956	21.4023	0.000241557	0.00137322	124	134	131	387	563	394	hisS	histidyl-tRNA synthetase
COO91_08908	0.8317	5.2814	12.789	0.0029505	0.0110813	200	135	240	539	857	606	none	Regulator of protease activity HflC%2C stomatin/prohibitin superfamily
COO91_01065	0.831559	3.39223	14.9671	0.00123376	0.00541973	52	67	40	166	204	180	none	LysM repeat
COO91_07843	0.830194	1.67879	7.90636	0.0120081	0.0348086	9	19	19	53	62	48	none	hypothetical protein
COO91_01910	0.829324	5.84454	43.037	4.87057e-06	4.93163e-05	285	277	265	925	823	1153	cpcT	phycocyanobilin lyase
COO91_09029	0.829077	6.03224	31.6798	3.01579e-05	0.000233832	164	224	202	624	786	625	none	Zn-dependent protease with chaperone function
COO91_04108	0.828645	3.4418	10.2655	0.00520598	0.0177388	51	52	41	154	233	107	phoD	alkaline phosphatase D [EC:3.1.3.1]
COO91_02140	0.828013	2.75474	11.6238	0.00334177	0.012299	40	31	27	106	115	121	none	Glycosyltransferase involved in cell wall bisynthesis
COO91_01465	0.827079	2.85353	15.9966	0.000929068	0.00427379	25	25	23	91	78	86	recD	exodeoxyribonuclease V alpha subunit [EC:3.1.11.5]
COO91_03103	0.826704	4.3669	20.8726	0.000273092	0.00151977	120	95	110	370	413	348	none	Carbohydrate-selective porin OprB
COO91_11058	0.826371	4.85093	35.4509	1.57409e-05	0.000133736	112	162	107	464	398	459	recD	exodeoxyribonuclease V alpha subunit [EC:3.1.11.5]
COO91_00917	0.826135	1.76144	7.37187	0.0147091	0.0410445	12	21	7	53	40	46	none	IS4 transposase
COO91_10010	0.825849	6.01765	27.0036	7.29348e-05	0.000495261	354	335	372	1082	1507	1072	none	Type II secretory pathway%2C component ExeA
COO91_03930	0.825061	2.37954	13.6709	0.00178943	0.007376	28	28	27	98	94	97	none	Cytochrome P450
COO91_03002	0.82493	5.36188	33.8663	2.05606e-05	0.000167455	175	231	193	737	744	585	none	hypothetical protein
COO91_01138	0.824395	4.90762	24.1399	0.000131673	0.00081256	113	198	139	567	455	535	none	DNA/RNA endonuclease G%2C NUC1
COO91_03332	0.82432	4.1222	32.5541	2.58203e-05	0.000204	74	86	77	274	281	266	ABC.CD.TX	HlyD family secretion protein
COO91_00350	0.823364	8.08193	8.49617	0.0143095	0.0401052	1817	1370	1507	4190	7971	3881	-	putative transposase
COO91_09206	0.823191	5.16904	41.0362	6.53457e-06	6.26486e-05	129	143	141	442	479	511	none	DNA primase
COO91_06367	0.823011	3.8205	24.4112	0.000124278	0.000773542	56	72	76	225	245	236	none	Lipopolysaccharide biosynthesis protein%2C LPS:glycosyltransferase
COO91_09571	0.822914	6.10608	53.94	1.15012e-06	1.40507e-05	297	370	330	1101	1165	1180	none	DNA primase
COO91_01130	0.822808	5.88346	36.2272	1.38523e-05	0.000119576	251	282	341	977	1045	1009	none	Phage- or plasmid-associated DNA primase
COO91_10295	0.821999	3.91424	22.6948	0.000180385	0.00106229	73	102	61	292	263	259	none	putative protein YjbI%2C containings pentapeptide repeats
COO91_03364	0.819431	2.38052	6.99298	0.0170431	0.0461649	23	16	33	65	113	70	none	hypothetical protein
COO91_10261	0.818494	4.6315	24.3255	0.000126561	0.000785041	105	148	113	496	350	422	none	Ca2+-binding protein%2C RTX toxin-related
COO91_08315	0.818268	7.43526	15.3272	0.00169454	0.00704639	801	704	681	2014	3381	2067	none	Large exoprotein involved in heme utilization or adhesion
COO91_00200	0.816875	6.57424	42.3967	5.34495e-06	5.3368e-05	456	507	405	1596	1697	1404	none	Tetratricopeptide
COO91_06855	0.816647	4.15704	17.6862	0.000595258	0.00292867	75	113	101	316	239	450	none	hypothetical protein
COO91_10259	0.815882	1.53297	7.44687	0.0142914	0.0400857	17	12	12	46	50	46	none	Cellulose synthase operon C%2C C-terminal
COO91_00037	0.81543	2.93231	10.3412	0.00507554	0.0173853	26	44	29	138	65	142	none	Winged helix-turn helix domain
COO91_06398	0.81482	5.31564	22.0429	0.00020874	0.00121277	210	252	221	811	928	593	none	putative transcriptional regulator
COO91_07247	0.814712	4.48259	29.7701	4.27744e-05	0.000316683	97	102	95	361	270	391	none	NTP pyrophosphatase%2C house-cleaning of non-canonical NTPs
COO91_01857	0.814702	4.08701	21.8027	0.000220424	0.00127043	78	121	67	300	302	308	none	Periplasmic serine protease%2C S1-C subfamily%2C containing C-terminal PDZ domain
COO91_00769	0.814121	4.90763	27.5047	6.60457e-05	0.000454785	158	170	125	590	424	556	ABC.MS.S	multiple sugar transport system substrate-binding protein
COO91_09590	0.813747	3.46974	8.45016	0.0102135	0.03048	55	59	49	147	270	135	none	hypothetical protein
COO91_06863	0.813684	4.26875	18.1985	0.000522515	0.00263669	112	87	86	293	384	302	trkH	trk system potassium uptake protein
COO91_04131	0.813199	4.56215	10.7113	0.00448857	0.0156926	23	21	30	66	95	94	none	Ca2+-binding protein%2C RTX toxin-related
COO91_04794	0.812712	2.29769	7.1252	0.0161839	0.0443254	24	18	34	92	103	67	none	Nucleotide-diphospho-sugar transferases
COO91_00341	0.812378	4.92619	14.9276	0.00135304	0.00586895	221	181	129	559	716	542	none	Molybdenum cofactor biosynthesis enzyme MoaA
COO91_10619	0.812001	5.46748	26.718	7.72181e-05	0.000519136	221	191	263	729	869	726	none	Large exoprotein involved in heme utilization or adhesion
COO91_06322	0.811884	3.99239	24.8863	0.000112422	0.00071203	62	65	68	221	196	258	none	mRNA-degrading endonuclease
COO91_10012	0.811198	6.12347	42.2664	5.44771e-06	5.39076e-05	353	393	342	1255	1338	1132	none	Site-specific DNA recombinase related to the DNA invertase Pin
COO91_07132	0.811132	5.06905	32.6784	2.52624e-05	0.000200469	192	187	186	616	704	619	none	Histidine kinase-like ATPase
COO91_10037	0.809527	2.77393	8.80538	0.00863849	0.0267151	31	57	22	108	137	128	none	Transposase
COO91_05340	0.80934	7.23425	45.1668	3.60101e-06	3.78054e-05	608	617	644	2106	2351	1945	none	hypothetical protein
COO91_04715	0.809049	4.96127	34.6569	1.79761e-05	0.000149672	121	128	114	441	394	414	ABC-2.A	ABC-2 type transport system ATP-binding protein
COO91_08041	0.808669	3.34038	11.1873	0.0038431	0.0138428	45	32	57	147	186	127	none	hypothetical protein
COO91_04734	0.808621	3.95264	13.3516	0.00196634	0.0079773	64	78	60	278	126	300	ccmK4	Carboxysome shell and ethanolamine utilization microcompartment protein CcmL/EutN
COO91_04264	0.806512	3.82932	14.5627	0.00138303	0.00596647	42	86	63	243	165	248	wcaI	colanic acid biosynthesis glycosyl transferase WcaI
COO91_00373	0.806212	5.35876	23.3456	0.000156313	0.000940488	196	145	144	517	572	579	none	Ca2+-binding protein%2C RTX toxin-related
COO91_06255	0.805634	4.26245	23.0867	0.00016543	0.000986024	62	99	57	270	226	248	none	DNA repair exonuclease SbcCD ATPase subunit
COO91_09405	0.805234	2.78959	15.3638	0.00110473	0.00494729	39	39	30	118	133	118	none	Fatty acid desaturase
COO91_08188	0.804527	4.25425	28.7418	5.1953e-05	0.000373399	94	119	106	369	387	331	tauD	taurine dioxygenase [EC:1.14.11.17]
COO91_02236	0.80448	2.90026	11.7598	0.00320101	0.0118697	44	37	35	157	108	136	chrA	chromate transporter
COO91_10118	0.80438	4.77231	20.8579	0.000274028	0.00152341	121	162	151	486	559	429	none	Cation transport ATPase
COO91_03272	0.804215	3.0653	12.642	0.00243453	0.00949598	56	53	43	165	206	146	thyX	thymidylate synthase (FAD) [EC:2.1.1.148]
COO91_09601	0.803586	1.5342	8.09511	0.0111923	0.0327863	15	11	13	46	47	41	none	hypothetical protein
COO91_09925	0.803161	6.02531	55.5545	9.47085e-07	1.19062e-05	318	335	338	1171	1043	1189	none	Transposase
COO91_06144	0.802616	1.99482	7.94276	0.0118456	0.0344485	18	15	21	58	68	59	none	Ribosomal protein S18 acetylase RimI and related acetyltransferases
COO91_07845	0.802614	3.36747	16.263	0.000864689	0.00402209	48	47	50	140	181	174	parB	chromosome partitioning protein, ParB family
COO91_01125	0.802517	3.78635	26.6013	7.9049e-05	0.000527924	94	102	92	392	257	344	none	hypothetical protein
COO91_08563	0.802137	8.95504	13.8119	0.00262554	0.0101351	2842	2649	2718	8086	12686	6911	none	hypothetical protein
COO91_03047	0.801492	8.95735	13.7783	0.00264819	0.0102007	2844	2653	2723	8094	12701	6912	none	hypothetical protein
COO91_11182	0.801401	4.85341	27.7845	6.25182e-05	0.000435271	182	193	170	655	636	568	none	Large exoprotein involved in heme utilization or adhesion
COO91_09215	0.801181	2.22466	7.83738	0.0123228	0.035597	21	26	10	72	56	67	none	IS4 transposase
COO91_02831	0.801079	5.83811	8.55268	0.0126041	0.0362452	359	251	349	829	1576	835	none	Harbinger transposase-derived nuclease domain
COO91_09508	0.801073	2.16416	7.18724	0.0157977	0.0435211	17	15	14	51	60	46	none	hypothetical protein
COO91_08245	0.801066	2.27347	8.04441	0.0114051	0.0333285	11	15	10	48	42	33	none	Methyl-accepting chemotaxis protein
COO91_01457	0.800442	8.95229	13.7539	0.00266478	0.0102492	2840	2644	2715	8066	12652	6900	none	hypothetical protein
COO91_00265	0.799917	8.95332	13.7424	0.00267263	0.010262	2845	2646	2716	8083	12654	6899	none	hypothetical protein
COO91_07683	0.799904	8.95051	13.7143	0.00269188	0.0103103	2836	2643	2713	8053	12641	6889	none	hypothetical protein
COO91_08501	0.799768	8.95085	13.7147	0.00269165	0.0103103	2838	2643	2712	8050	12641	6893	none	hypothetical protein
COO91_00658	0.799645	2.21568	8.55866	0.00944225	0.0286696	26	22	14	82	60	71	potD	spermidine/putrescine transport system substrate-binding protein
COO91_05106	0.799093	5.04214	27.0634	7.20719e-05	0.000490676	184	149	125	517	546	500	cobW	cobalamin synthesis protein
COO91_08569	0.798289	1.93514	8.71644	0.00891897	0.0274258	24	21	18	68	75	72	none	ADP-ribose pyrophosphatase YjhB%2C NUDIX family
COO91_02299	0.79753	8.9564	13.5738	0.00279636	0.0106203	2846	2651	2732	8072	12687	6903	none	hypothetical protein
COO91_10167	0.797214	3.87223	12.894	0.00225526	0.00888639	66	70	68	216	304	167	none	hypothetical protein
COO91_02847	0.797077	8.96016	13.5959	0.00277499	0.0105651	2854	2672	2733	8109	12722	6920	none	hypothetical protein
COO91_00616	0.796784	1.19718	6.96834	0.0172089	0.0465435	9	9	9	36	23	34	higA	proteic killer suppression protein
COO91_07805	0.796645	5.39928	34.9418	1.71357e-05	0.000143669	202	244	248	710	857	785	none	Tetratricopeptide
COO91_07666	0.796174	2.30994	7.15229	0.0160139	0.0439824	28	30	21	96	108	63	E2.6.1.76	diaminobutyrate-2-oxoglutarate transaminase [EC:2.6.1.76]
COO91_09379	0.796166	6.0949	25.5176	9.85825e-05	0.000634775	377	359	394	1128	1572	1119	none	Type II secretory pathway%2C component ExeA
COO91_06798	0.795944	2.59188	7.92725	0.0119145	0.034593	23	28	29	90	66	119	none	mRNA-degrading endonuclease
COO91_08478	0.795229	2.80093	11.9499	0.00301528	0.0112776	32	30	23	87	101	101	none	hypothetical protein
COO91_08750	0.793045	6.6357	42.075	5.60265e-06	5.508e-05	444	570	529	1625	1837	1752	none	Phage shock protein A
COO91_01177	0.791485	6.38689	44.3392	4.04421e-06	4.16503e-05	434	455	451	1472	1294	1811	none	Transposase
COO91_03685	0.790359	2.30048	8.32661	0.0102762	0.0306223	20	26	20	77	91	54	none	hypothetical protein
COO91_10195	0.790006	8.01487	58.9509	6.38288e-07	8.57174e-06	1236	1261	1296	4401	4365	4096	none	IS4 transposase
COO91_04733	0.788979	4.56653	21.1162	0.000258049	0.00144946	116	95	122	441	384	308	ccmK3	Carboxysome shell and ethanolamine utilization microcompartment protein CcmL/EutN
COO91_06723	0.788013	5.02257	25.7735	9.35232e-05	0.000606528	137	141	111	438	492	379	none	hypothetical protein
COO91_11192	0.787709	4.63273	25.0396	0.000108873	0.000692795	143	110	150	467	459	446	none	Spore coat polysaccharide biosynthesis protein SpsF%2C cytidylyltransferase family
COO91_09470	0.787682	3.90807	13.3964	0.00194037	0.00789868	53	63	87	219	269	196	none	Glutamate-1-semialdehyde aminotransferase
COO91_03124	0.786485	5.86702	23.6394	0.000146643	0.000890212	156	189	127	500	621	457	none	Protease inhibitor I10%2C marinostatin
COO91_01572	0.785941	2.74995	6.85028	0.0180292	0.0482749	23	20	46	92	130	78	none	Pimeloyl-ACP methyl ester carboxylesterase
COO91_08246	0.785173	3.88651	12.7088	0.00238548	0.00933063	42	35	31	117	139	108	none	ATPase involved in DNA repair
COO91_00290	0.785002	4.08296	18.7157	0.000459033	0.00235701	51	36	41	147	130	159	none	Pullulanase/glycogen debranching enzyme
COO91_10137	0.782673	4.55659	17.6152	0.000606213	0.00297176	103	142	88	363	398	352	E3.6.3.8	Ca2+-transporting ATPase [EC:3.6.3.8]
COO91_05943	0.781996	8.99608	13.3495	0.00295769	0.0111044	2924	2719	2814	8275	12832	7028	none	hypothetical protein
COO91_04878	0.781229	3.69023	12.8772	0.0022667	0.00892498	58	66	72	211	280	163	none	Endonuclease%2C Uma2 family
COO91_09381	0.780418	6.20206	39.3171	8.48301e-06	7.84787e-05	376	421	363	1309	1396	1182	none	Site-specific DNA recombinase related to the DNA invertase Pin
COO91_07187	0.780007	3.89747	7.21366	0.0173572	0.0468281	84	60	89	231	380	165	none	hypothetical protein
COO91_04232	0.779528	4.92409	13.298	0.00218083	0.00864662	159	203	177	743	410	680	none	Lysyl-tRNA synthetase
COO91_04738	0.779431	2.14813	7.01213	0.0169155	0.0459111	14	25	19	62	72	60	bcsA	cellulose synthase (UDP-forming) [EC:2.4.1.12]
COO91_00191	0.778769	5.95099	8.409	0.0131591	0.0374235	387	254	360	868	1589	880	none	Harbinger transposase-derived nuclease domain
COO91_06875	0.778769	5.95099	8.409	0.0131591	0.0374235	387	254	360	868	1589	880	none	Harbinger transposase-derived nuclease domain
COO91_04231	0.777694	5.19605	25.1678	0.000105999	0.000676496	197	298	229	799	892	716	none	hypothetical protein
COO91_01547	0.77732	4.18384	15.6802	0.00101263	0.00460148	84	60	80	222	253	282	none	DNA-binding transcriptional regulator%2C IscR family
COO91_03829	0.776544	3.88341	11.9319	0.00303228	0.0113373	71	76	79	197	343	209	none	Endonuclease%2C Uma2 family
COO91_03173	0.776009	3.59394	12.036	0.00293514	0.0110312	73	55	54	181	242	186	none	putative transposase YdaD
COO91_08600	0.775629	5.28286	26.7345	7.69641e-05	0.000517811	198	208	189	600	778	604	none	putative transposase YdaD
COO91_03814	0.775551	4.1011	9.7282	0.00644925	0.0210705	48	71	69	240	117	283	none	Cytochrome bd-type quinol oxidase%2C subunit 1
COO91_02963	0.774887	4.95571	20.623	0.00028953	0.0015981	162	234	177	617	693	594	E1.2.1.3	aldehyde dehydrogenase (NAD+) [EC:1.2.1.3]
COO91_07439	0.774411	4.10552	24.4341	0.000123677	0.000771109	64	91	82	269	216	313	pstS	phosphate transport system substrate-binding protein
COO91_06400	0.773183	3.94053	19.4875	0.000379754	0.0020051	70	73	89	268	269	241	rfbD	dTDP-6-deoxy-L-mannose-dehydrogenase
COO91_02889	0.773016	5.00467	29.3096	4.66393e-05	0.000340407	160	175	135	553	552	463	none	Protein of unknown function DUF3352
COO91_06318	0.77283	5.39027	21.4809	0.000237234	0.00135362	221	258	203	709	908	642	none	putative protein YjbI%2C containings pentapeptide repeats
COO91_09531	0.77274	8.43681	52.6362	1.34992e-06	1.61811e-05	1833	2049	1954	6226	6840	6419	none	Secreted protein containing bacterial Ig-like domain and vWFA domain
COO91_08347	0.772363	4.42814	26.6005	7.90618e-05	0.000527924	90	111	94	323	316	348	none	hypothetical protein
COO91_04530	0.772359	5.51579	26.3382	8.33581e-05	0.000549828	94	134	137	391	428	398	manA	mannose-6-phosphate isomerase [EC:5.3.1.8]
COO91_04595	0.772326	5.43765	17.1993	0.000696506	0.00333731	299	255	237	816	1106	705	none	Lysophospholipase L1 or related esterase
COO91_01487	0.772098	5.34731	32.2086	2.7445e-05	0.000215577	198	241	237	676	832	742	none	Tetratricopeptide
COO91_04905	0.771403	4.16223	15.3573	0.00110673	0.00495215	95	85	99	262	308	367	none	Glycosyltransferase%2C GT2 family
COO91_01078	0.771005	5.85611	37.9442	1.05112e-05	9.47321e-05	289	253	304	981	940	922	pqqE	pyrroloquinoline quinone biosynthesis protein E
COO91_00131	0.77066	4.79462	33.4504	2.20851e-05	0.000178795	145	176	125	569	447	476	ddl	D-alanine-D-alanine ligase [EC:6.3.2.4]
COO91_03937	0.77019	2.02665	7.30713	0.0150808	0.041898	23	21	18	77	67	64	none	Chromosome segregation ATPases
COO91_07716	0.769194	7.67821	51.1401	1.62849e-06	1.90354e-05	971	1088	1153	3816	3610	3305	none	hypothetical protein
COO91_03752	0.76876	3.98524	17.4149	0.000638334	0.00310862	68	70	92	238	295	233	none	Mobile element protein
COO91_01345	0.768534	4.18652	21.0611	0.000261372	0.00146585	95	95	99	276	359	327	none	Transposase%2C IS4-like
COO91_10243	0.767833	6.42104	36.9977	1.22248e-05	0.000107161	462	545	427	1447	1527	1804	none	Large exoprotein involved in heme utilization or adhesion
COO91_09828	0.767322	6.27691	24.427	0.000123863	0.000771401	378	399	503	1386	1562	1317	none	pathogenesis-related transcriptional factor and ERF
COO91_02532	0.766233	2.59428	6.83827	0.0181152	0.0484265	11	18	31	60	74	66	none	Triacylglycerol esterase/lipase EstA%2C alpha/beta hydrolase fold
COO91_02347	0.765758	5.31447	21.3961	0.0002419	0.00137445	185	198	206	592	689	679	none	putative ATPase%2C archaeal AAA+ ATPase superfamily
COO91_05123	0.765689	3.69415	13.665	0.00179251	0.00738566	56	79	72	227	283	172	none	Endonuclease%2C Uma2 family
COO91_00442	0.76556	2.9827	9.23777	0.00740954	0.0236511	20	29	48	113	110	101	hemD	uroporphyrinogen-III synthase
COO91_10375	0.765121	2.88798	8.81865	0.00859751	0.0266471	22	39	27	87	76	131	none	Large exoprotein involved in heme utilization or adhesion
COO91_00641	0.76503	6.65605	23.702	0.00014467	0.000878738	419	412	466	1268	1768	1253	none	hypothetical protein
COO91_04414	0.76331	8.12546	19.2448	0.000521393	0.00263416	1529	1519	1391	4877	5999	3759	none	serine/threonine protein kinase
COO91_02304	0.763103	2.88541	10.8595	0.00427543	0.0151134	30	44	30	139	94	114	bioY	biotin transport system substrate-specific component
COO91_06542	0.762676	4.90373	26.8499	7.52068e-05	0.000508139	145	192	190	595	553	605	none	Ubiqui/menaqui biosynthesis C-methylase UbiE
COO91_09050	0.762646	3.41865	13.3752	0.00195261	0.00793952	58	43	48	166	119	218	pstS	phosphate transport system substrate-binding protein
COO91_09623	0.761932	8.60892	49.6538	1.97044e-06	2.22864e-05	2413	2748	2427	8161	8841	8114	none	Catechol 2%2C3-dioxygenase or other lactoylglutathione lyase family enzyme
COO91_10623	0.761196	5.35553	22.9922	0.000168904	0.00100196	196	181	192	504	718	662	none	putative ATPase%2C archaeal AAA+ ATPase superfamily
COO91_02515	0.760839	7.98071	65.5864	3.10192e-07	4.66971e-06	1293	1541	1352	4804	4463	4624	infC	translation initiation factor IF-3
COO91_09131	0.760463	6.20942	48.9709	2.15392e-06	2.40599e-05	358	395	393	1332	1209	1272	none	Transposase
COO91_09162	0.760463	6.20942	48.9709	2.15392e-06	2.40599e-05	358	395	393	1332	1209	1272	none	Transposase
COO91_00606	0.760282	4.93688	10.5238	0.00554	0.0186574	162	154	190	519	754	389	none	Cell division protein FtsL
COO91_08874	0.758353	5.22683	28.3055	5.64982e-05	0.000399959	200	181	215	615	728	632	none	DNA-binding response regulator%2C OmpR family%2C containings REC and winged-helix
COO91_00708	0.758133	3.19273	14.4397	0.00143235	0.00613591	36	51	26	132	112	130	none	Acyl-CoA synthetase
COO91_09806	0.758114	5.36529	19.6949	0.000361156	0.00192002	199	170	147	550	628	529	none	Ca2+-binding protein%2C RTX toxin-related
COO91_00054	0.756696	6.10931	47.2746	2.69825e-06	2.92351e-05	337	358	373	1257	1089	1206	none	Transposase
COO91_01336	0.756696	6.10931	47.2746	2.69825e-06	2.92351e-05	337	358	373	1257	1089	1206	none	Transposase
COO91_01873	0.756696	6.10931	47.2746	2.69825e-06	2.92351e-05	337	358	373	1257	1089	1206	none	Transposase
COO91_01012	0.756696	6.10917	47.2324	2.71364e-06	2.93206e-05	337	358	373	1257	1089	1206	none	Transposase
COO91_03440	0.756696	6.10917	47.2324	2.71364e-06	2.93206e-05	337	358	373	1257	1089	1206	none	Transposase
COO91_02914	0.756663	3.86294	17.936	0.000558464	0.00278691	60	87	84	275	188	308	none	Permease of the drug/metabolite transporter
COO91_09059	0.756373	5.20201	17.5196	0.000621322	0.0030362	163	244	165	551	613	718	none	Photosystem II reaction centre protein Ycf12
COO91_03434	0.756131	2.76448	11.6907	0.00327173	0.0120741	32	42	24	127	92	106	none	Spore coat polysaccharide biosynthesis protein SpsF%2C cytidylyltransferase family
COO91_06402	0.755432	3.96469	17.0853	0.000695456	0.00333375	79	85	73	270	243	273	E2.7.7.24	glucose-1-phosphate thymidylyltransferase [EC:2.7.7.24]
COO91_09312	0.755128	6.11254	48.9853	2.14986e-06	2.40599e-05	339	363	367	1236	1073	1243	none	Transposase
COO91_02314	0.755114	3.83988	20.9483	0.000268312	0.00149702	69	64	75	244	224	223	APRT	adenine phosphoribosyltransferase [EC:2.4.2.7]
COO91_07249	0.754554	3.80495	24.9092	0.000111884	0.000709865	71	67	73	234	220	247	none	Endonuclease%2C Uma2 family
COO91_02142	0.75441	3.83757	14.0184	0.00161693	0.0067731	60	53	78	228	174	237	hepA	ATP-binding protein; heterocyst differentiation protein of ABC transporter
COO91_10644	0.753485	2.72784	11.9185	0.00304509	0.0113812	32	30	28	110	90	99	none	Murein DD-endopeptidase MepM and murein hydrolase activator NlpD%2C containing LysM domain
COO91_06793	0.753475	1.58252	7.34864	0.0148413	0.0413599	11	14	9	42	31	40	ureF	urease accessory protein
COO91_01911	0.753474	2.27133	7.71836	0.0128882	0.0369052	20	26	22	65	81	78	none	Integrase
COO91_00203	0.753311	4.14534	16.8111	0.000747356	0.00354642	93	108	102	279	369	348	none	putative protein YjbI%2C containings pentapeptide repeats
COO91_09977	0.752796	4.90723	23.605	0.000147738	0.000894863	134	107	135	445	395	411	none	hypothetical protein
COO91_10626	0.751992	2.92213	8.29428	0.0103989	0.0308801	32	41	30	119	78	146	none	Methyl-accepting chemotaxis protein
COO91_10512	0.75169	4.294	25.283	0.000103489	0.000663208	81	81	90	260	272	302	none	Thymidylate kinase
COO91_09150	0.750479	5.11782	31.5862	3.06685e-05	0.000237451	132	126	134	470	387	444	none	hypothetical protein
COO91_04100	0.750072	7.21856	39.2692	8.54594e-06	7.8926e-05	944	1072	761	2946	2993	3187	chlH	magnesium chelatase subunit H [EC:6.6.1.1]
COO91_10293	0.749493	2.24116	10.1267	0.00545517	0.018446	35	38	20	97	100	109	pebA	15,16-dihydrobiliverdin:ferredoxin oxidoreductase [EC:1.3.7.2]
COO91_09726	0.749418	3.72364	17.5206	0.000621161	0.0030362	59	58	54	186	153	229	none	Methyl-accepting chemotaxis protein
COO91_08603	0.749017	2.17181	7.74272	0.0127701	0.0366447	26	16	13	59	62	61	none	hypothetical protein
COO91_04986	0.748776	2.85063	12.573	0.00248637	0.00966337	31	26	25	76	89	106	none	hypothetical protein
COO91_00765	0.748692	4.99313	28.0927	5.88747e-05	0.000414074	152	194	134	570	489	519	msmX	multiple sugar transport system ATP-binding protein
COO91_02285	0.746819	3.86285	19.4935	0.000379202	0.00200317	76	82	76	267	194	316	TST	thiosulfate/3-mercaptopyruvate sulfurtransferase [EC:2.8.1.1 2.8.1.2]
COO91_10307	0.746322	8.40143	10.736	0.00632857	0.0207829	2077	1928	2068	5603	9213	4872	none	Transposase
COO91_11066	0.746322	8.40143	10.736	0.00632857	0.0207829	2077	1928	2068	5603	9213	4872	none	Transposase
COO91_06649	0.74619	3.07006	14.5568	0.00138534	0.00597102	32	32	30	114	89	108	none	hypothetical protein
COO91_00683	0.745963	3.50139	15.7759	0.000986508	0.00450737	40	42	59	172	147	147	DPM1	dolichol-phosphate mannosyltransferase [EC:2.4.1.83]
COO91_02903	0.745906	5.53832	11.5325	0.00415991	0.0147629	279	237	211	716	1070	575	pilL	type IV pili sensor histidine kinase and response regulator
COO91_03647	0.745453	6.28579	33.9715	2.01936e-05	0.000164963	302	300	365	1016	1040	1134	none	putative protein related to plant photosystem II stability/assembly factor
COO91_07912	0.744681	7.32947	40.3526	7.2421e-06	6.85813e-05	930	835	898	2827	3101	2824	none	SRSO17 transposase
COO91_02961	0.744522	2.44126	8.99887	0.00806211	0.0253823	35	18	28	91	92	85	rdgB	XTP/dITP diphosphohydrolase [EC:3.6.1.66]
COO91_07150	0.743809	1.93772	8.09834	0.0111789	0.0327687	12	22	24	67	67	56	none	hypothetical protein
COO91_01505	0.743648	7.26496	48.7818	2.20807e-06	2.45887e-05	654	683	709	2319	2212	2195	none	Ca2+-binding protein%2C RTX toxin-related
COO91_01371	0.743531	7.12058	42.4262	5.32199e-06	5.32396e-05	435	593	524	1831	1490	1779	none	Non-ribosomal peptide synthetase component F
COO91_03763	0.742976	5.70071	35.1596	1.65228e-05	0.000139394	328	294	290	960	976	1066	atpI	F-type H+-transporting ATPase subunit a
COO91_02273	0.742345	4.40321	19.7541	0.000356037	0.00189559	91	104	85	316	329	269	none	Signal transduction histidine kinase
COO91_06819	0.742097	5.16944	24.0929	0.000133003	0.000819364	211	175	194	588	711	601	none	Bifunctional DNA-binding transcriptional regulator of stationary
COO91_03227	0.741951	5.32124	23.0329	0.000167397	0.000995554	249	203	203	653	813	677	none	DNA-binding response regulator%2C OmpR family%2C containings REC and winged-helix
COO91_03873	0.741637	4.63657	26.0013	8.92649e-05	0.00058294	106	166	131	480	368	474	none	DNA-binding response regulator%2C OmpR family%2C containings REC and winged-helix
COO91_03115	0.741404	4.36657	13.1104	0.00211308	0.00842229	116	114	110	342	475	286	none	Murein DD-endopeptidase MepM and murein hydrolase activator NlpD%2C containing LysM domain
COO91_01532	0.740766	2.94539	16.1137	0.000900133	0.00416014	44	48	43	169	123	153	nagA	N-acetylglucosamine-6-phosphate deacetylase [EC:3.5.1.25]
COO91_01599	0.739043	7.07287	51.7809	1.50199e-06	1.77872e-05	580	685	625	2042	2119	2003	livM	branched-chain amino acid transport system permease protein
COO91_06094	0.738542	4.00578	13.6336	0.00180914	0.00743719	40	41	55	137	169	138	none	DNA-directed RNA polymerase specialized sigma subunit%2C sigma24 family
COO91_06463	0.737894	2.70681	8.38712	0.010051	0.0301363	24	31	32	97	100	87	dndD	DNA sulfur modification protein DndD
COO91_06628	0.736865	9.05865	47.9554	2.46318e-06	2.7095e-05	2456	2637	2453	8173	8690	7713	gpmI	2,3-bisphosphoglycerate-independent phosphoglycerate mutase [EC:5.4.2.12]
COO91_03682	0.736158	3.75183	19.637	0.000366245	0.0019423	64	79	56	252	171	230	none	Flp pilus assembly protein TadD%2C containings TPR repeats
COO91_02709	0.735765	7.32418	18.0844	0.000652553	0.00316453	875	807	942	2555	3576	2372	none	Peptidoglycan-binding
COO91_10044	0.735636	8.94905	20.8386	0.000311308	0.00169753	2831	2721	2664	7930	10969	7689	none	Thiamin-phosphate pyrophosphorylase
COO91_01727	0.734885	4.89899	12.4378	0.00264642	0.0101975	128	94	121	309	480	324	none	Ca2+-binding protein%2C RTX toxin-related
COO91_05916	0.734815	2.36669	10.162	0.00539056	0.0182735	22	33	26	84	94	85	none	hypothetical protein
COO91_10683	0.734552	4.05461	12.1615	0.00282262	0.01069	58	85	86	333	159	264	none	hypothetical protein
COO91_10516	0.733552	3.79488	20.207	0.000319454	0.00173322	51	55	67	199	171	197	none	SRSO17 transposase
COO91_08877	0.732955	3.96387	11.5259	0.00344749	0.012644	109	89	99	273	411	277	none	EAL domain%2C c-di-GMP-specific phosphodiesterase class I
COO91_06675	0.732887	3.93257	8.18727	0.0111831	0.0327687	54	107	41	173	241	233	none	hypothetical protein
COO91_06154	0.729907	4.1541	27.7834	6.2532e-05	0.000435271	81	90	79	279	238	299	none	cAMP-binding domain of CRP or a regulatory subunit of cAMP-dependent protein kinases
COO91_03887	0.729816	2.95499	10.1515	0.00540972	0.0183156	33	37	53	144	135	122	none	fdxN element excision controlling factor protein
COO91_08873	0.728203	3.65918	18.3564	0.000502141	0.00254933	57	71	64	225	178	223	none	DNA-binding response regulator%2C OmpR family%2C containings REC and winged-helix
COO91_00026	0.728018	3.32914	11.264	0.00374918	0.0135632	52	46	47	198	95	186	none	Helix-turn-helix domain
COO91_00087	0.728018	3.32914	11.264	0.00374918	0.0135632	52	46	47	198	95	186	none	Helix-turn-helix domain
COO91_09462	0.727745	2.62117	8.09729	0.0111833	0.0327687	36	38	25	101	98	123	none	Acyl-CoA dehydrogenase related to the alkylation response protein AidB
COO91_00233	0.727656	4.05332	13.4273	0.0019227	0.00784149	88	64	93	238	236	330	none	putative metal-dependent hydrolase
COO91_09814	0.727155	2.42271	7.58903	0.0135362	0.0383134	33	31	27	83	86	128	none	hypothetical protein
COO91_01673	0.727089	4.51944	25.9056	9.10265e-05	0.000593536	121	121	115	409	348	407	E3.1.3.25	myo-inositol-1(or 4)-monophosphatase [EC:3.1.3.25]
COO91_06950	0.727085	2.78082	7.36421	0.0147525	0.041155	24	22	48	103	103	101	none	Endonuclease%2C Uma2 family
COO91_03656	0.726782	6.15386	10.046	0.00703549	0.0226814	192	162	269	670	850	494	none	Flagellar hook protein FlgE
COO91_00456	0.725828	2.55197	7.23413	0.0155128	0.0428563	26	28	29	92	55	126	ftrV	ferredoxin-thioredoxin reductase variable subunit
COO91_03686	0.7258	1.86437	8.1418	0.0110003	0.0323818	14	21	16	60	46	60	rimJ	ribosomal-protein-alanine N-acetyltransferase [EC:2.3.1.128]
COO91_08340	0.725327	2.09892	7.1922	0.0157673	0.0434752	19	20	23	50	61	91	none	hypothetical protein
COO91_09834	0.724894	4.6572	19.7633	0.000355251	0.00189327	145	163	161	530	541	444	none	hypothetical protein
COO91_01809	0.724513	2.91002	9.32492	0.00718651	0.0230958	37	40	31	105	113	132	none	hypothetical protein
COO91_02148	0.724294	3.88837	15.4521	0.00107814	0.00484423	81	68	57	215	253	197	none	Glycosyltransferase involved in cell wall bisynthesis
COO91_03086	0.724062	3.67179	12.9363	0.00222658	0.00880223	57	52	77	216	221	166	none	Ferredoxin subunit of nitrite reductase or a ring-hydroxylating dioxygenase
COO91_08918	0.72329	4.99181	9.32238	0.00833425	0.0260496	199	190	189	546	861	437	none	Transmembrane protein TauE-like
COO91_08884	0.723074	4.26156	18.5729	0.000475649	0.00242965	105	91	104	296	351	324	none	Transposase%2C IS4-like
COO91_05023	0.721883	5.43533	21.0337	0.000263039	0.00147422	218	257	237	769	890	624	none	Endonuclease%2C Uma2 family
COO91_10313	0.720931	4.01725	11.3784	0.00361391	0.0131501	95	66	96	267	332	231	none	Archaeal ribosome-binding protein aMBF1
COO91_05345	0.720406	3.84401	16.302	0.000855677	0.00399218	61	73	55	194	221	192	modC	molybdate transport system ATP-binding protein [EC:3.6.3.29]
COO91_05892	0.719461	4.08819	11.9761	0.00299064	0.0112048	59	102	93	280	308	224	narM	Nitrate reductase-related protein
COO91_07006	0.719245	4.47786	8.85603	0.00919486	0.0280986	134	99	113	331	511	264	none	Tetratricopeptide
COO91_09921	0.717951	7.48485	41.2707	6.30994e-06	6.09267e-05	767	831	839	2652	2693	2505	none	Ca2+-binding protein%2C RTX toxin-related
COO91_10645	0.717618	2.94429	13.2898	0.00200281	0.00809388	36	38	27	109	93	125	none	Type IV secretory pathway%2C VirD4 component%2C TraG/TraD family ATPase
COO91_11200	0.716521	3.07322	9.01535	0.00801507	0.0253004	34	36	42	141	69	157	none	hypothetical protein
COO91_05960	0.716491	6.90736	34.4802	1.85206e-05	0.000153615	550	646	582	1779	2071	1844	sbcC	exonuclease SbcC
COO91_08868	0.716478	2.61697	7.14111	0.0160838	0.0441408	24	32	21	83	77	88	none	Patatin-like phospholipase/acyl hydrolase
COO91_10290	0.716207	2.80835	8.5415	0.00950123	0.0288232	28	53	49	149	121	149	cpeU	bilin biosynthesis protein
COO91_08562	0.713689	4.38808	20.4057	0.000304746	0.00166932	115	104	114	319	387	364	none	Transposase%2C IS4-like
COO91_00983	0.713623	4.39287	20.4003	0.000305139	0.00166978	115	105	114	321	388	364	none	Transposase%2C IS4-like
COO91_11092	0.713521	2.96839	8.66239	0.00909443	0.0278467	46	42	23	119	125	112	none	Phosphatidylserine/phosphatidylglycerophosphate/cardiolipin synthase
COO91_03756	0.71347	4.39302	20.9383	0.000268943	0.00149899	115	105	114	321	387	365	none	Transposase%2C IS4-like
COO91_06838	0.713464	4.39348	20.9906	0.000265683	0.00148664	115	105	114	322	387	364	none	Transposase%2C IS4-like
COO91_05214	0.713322	2.89632	7.03112	0.01679	0.0456851	30	29	40	114	130	73	none	DNA-binding response regulator%2C NarL/FixJ family%2C containings REC and HTH domains
COO91_07918	0.710891	4.39009	20.3169	0.000311222	0.00169753	115	105	114	320	387	364	none	Transposase%2C IS4-like
COO91_01886	0.710891	4.38957	20.294	0.000312919	0.0017026	115	105	114	320	387	364	none	Transposase%2C IS4-like
COO91_04405	0.710891	4.38957	20.294	0.000312919	0.0017026	115	105	114	320	387	364	none	Transposase%2C IS4-like
COO91_07717	0.710891	4.38957	20.294	0.000312919	0.0017026	115	105	114	320	387	364	none	Transposase%2C IS4-like
COO91_03525	0.710813	4.36274	18.7877	0.000450898	0.00232295	71	99	98	291	236	337	trpG	anthranilate synthase component II
COO91_03187	0.710595	7.62307	47.8972	2.48236e-06	2.72782e-05	1102	1082	1085	3509	3599	3381	none	SRSO17 transposase
COO91_07211	0.71059	6.46139	28.4796	5.46329e-05	0.000389044	271	255	352	1033	800	1015	none	4-amino-4-deoxy-L-arabinose transferase or related glycosyltransferase of PMT family
COO91_07955	0.710437	2.6415	10.7344	0.00445461	0.0155991	30	36	33	98	120	98	none	DNA-binding response regulator%2C OmpR family%2C containings REC and winged-helix
COO91_00137	0.710055	3.97975	13.2124	0.00204954	0.00823775	52	88	84	295	185	242	none	DNA-binding transcriptional regulator%2C LysR family
COO91_10185	0.709895	3.28067	12.8899	0.002258	0.00889396	35	46	55	133	139	165	parB	chromosome partitioning protein, ParB family
COO91_01569	0.709429	2.99018	11.3967	0.00359275	0.0130936	44	35	43	130	148	113	none	Serine/threonine protein kinase
COO91_00571	0.708382	6.28118	27.2192	6.98768e-05	0.000477793	366	335	370	1006	1252	1169	none	Transposase
COO91_00480	0.708197	3.32692	10.2969	0.00515137	0.0175894	49	48	43	119	156	173	E3.1.3.8	3-phytase [EC:3.1.3.8]
COO91_04278	0.707963	6.12446	12.4776	0.00308656	0.0115163	410	294	386	956	1478	1042	none	Large exoprotein involved in heme utilization or adhesion
COO91_05375	0.707748	4.99147	20.1598	0.000323059	0.0017484	150	191	131	622	390	506	none	Transposase
COO91_09495	0.70774	2.3602	7.95523	0.0117906	0.0343215	23	26	28	100	82	65	none	Type II site-specific deoxyribonuclease
COO91_10419	0.707674	2.99874	10.1287	0.00545149	0.0184397	43	47	37	136	129	142	none	hypothetical protein
COO91_06231	0.707304	2.53892	6.84612	0.0180589	0.0483119	21	25	27	100	68	67	none	putative nuclease of the RNAse H fold%2C HicB family
COO91_09658	0.706135	1.95445	7.33615	0.0149129	0.0415167	20	20	17	53	67	62	none	hypothetical protein
COO91_05081	0.705685	3.66918	13.8092	0.00171839	0.00712122	54	62	72	168	233	197	none	Mobile element protein
COO91_07564	0.70493	5.83008	14.9131	0.00132302	0.00575345	314	294	287	877	1228	725	none	Serine/threonine protein kinase
COO91_10282	0.704349	9.17818	25.2512	0.000104176	0.000666428	3620	4524	4031	11735	15365	11339	none	putative ATPase%2C archaeal AAA+ ATPase superfamily
COO91_05221	0.704259	5.11009	24.222	0.000129384	0.000801176	158	164	137	446	429	597	none	Large exoprotein involved in heme utilization or adhesion
COO91_03700	0.704072	6.65841	32.0008	2.84769e-05	0.000221854	630	585	544	1828	2026	1752	murA	UDP-N-acetylglucosamine 1-carboxyvinyltransferase [EC:2.5.1.7]
COO91_00771	0.703772	4.6674	21.1286	0.00025731	0.00144607	137	167	147	503	364	584	none	DNA-binding response regulator%2C OmpR family%2C containings REC and winged-helix
COO91_10769	0.70345	3.06079	10.4382	0.00491371	0.016922	42	44	30	102	141	125	none	Cobyrinic acid a%2Cc-diamide synthase
COO91_07771	0.703211	2.80544	9.89183	0.00590792	0.019701	51	52	27	138	147	128	none	hypothetical protein
COO91_08957	0.70312	5.6827	20.234	0.000317408	0.00172298	353	446	258	1139	1110	1102	fus	translation elongation factor EF-G
COO91_10618	0.702851	4.69347	21.466	0.00023805	0.00135685	136	130	138	490	439	362	none	UDP:flavonoid glycosyltransferase YjiC%2C YdhE family
COO91_05869	0.7028	6.98693	34.0506	1.99228e-05	0.000163243	275	290	340	955	1005	928	none	Protein of unknown function UCP005295
COO91_03138	0.702101	3.90019	14.7401	0.00131519	0.00572348	86	99	79	262	325	248	fadL	long-chain fatty acid transport protein
COO91_05249	0.701416	5.46628	17.2358	0.000668688	0.00322832	268	278	211	791	971	626	none	Tetratricopeptide
COO91_05861	0.700678	4.06618	22.4629	0.000189945	0.00111133	68	79	65	234	211	231	none	Glycine/D-amino acid oxidase
COO91_10660	0.700416	2.83019	6.81053	0.0183153	0.048853	31	24	45	100	94	128	none	hypothetical protein
COO91_09568	0.700234	3.23722	11.0333	0.00403976	0.0144026	37	40	37	116	114	134	none	hypothetical protein
COO91_02728	0.69935	4.91595	16.9533	0.000719933	0.00343587	178	143	141	516	532	423	none	hypothetical protein
COO91_04731	0.698824	3.4639	11.4434	0.00353948	0.0129255	35	62	48	154	135	172	none	Lysophospholipase%2C alpha-beta hydrolase superfamily
COO91_11186	0.698747	3.45818	12.3776	0.00264009	0.0101804	76	52	62	196	168	248	none	K+-sensing histidine kinase KdpD
COO91_06320	0.698347	4.84872	13.7776	0.00173438	0.00717893	153	109	93	478	278	390	dacB	D-alanyl-D-alanine carboxypeptidase / D-alanyl-D-alanine-endopeptidase (penicillin-binding protein 4) [EC:3.4.16.4 3.4.21.-]
COO91_04227	0.698135	2.89531	11.799	0.00316168	0.01174	47	48	45	138	154	153	none	Putative nucleotidyltransferase
COO91_01674	0.69724	4.27661	16.4317	0.000826518	0.00387722	114	94	106	336	368	294	panE	2-dehydropantoate 2-reductase [EC:1.1.1.169]
COO91_09134	0.696529	7.00097	36.8238	1.25724e-05	0.000109657	497	590	519	1759	1802	1516	-	putative DNA primase/helicase
COO91_09692	0.696394	6.21901	41.3242	6.25984e-06	6.06594e-05	380	398	414	1338	1187	1275	none	Transposase
COO91_09901	0.696394	6.21901	41.3242	6.25984e-06	6.06594e-05	380	398	414	1338	1187	1275	none	Transposase
COO91_09956	0.696394	6.21901	41.3242	6.25984e-06	6.06594e-05	380	398	414	1338	1187	1275	none	Transposase
COO91_09753	0.696394	6.21889	41.2914	6.29048e-06	6.0793e-05	380	398	414	1338	1187	1275	none	Transposase
COO91_10892	0.696317	7.45238	45.1064	3.63144e-06	3.80879e-05	1044	1060	1071	3332	3453	3299	cheBR_4	two-component system, chemotaxis family, CheB/CheR fusion protein [EC:2.1.1.80 3.1.1.61]
COO91_08039	0.695786	4.03898	10.1726	0.0053712	0.0182136	70	79	102	238	340	212	none	hypothetical protein
COO91_09216	0.695622	5.13839	18.8403	0.00044506	0.00229944	185	210	233	651	770	561	none	hypothetical protein
COO91_03131	0.695472	4.84932	14.601	0.00136805	0.00591544	178	163	138	452	620	436	ACSF3	malonyl-CoA/methylmalonyl-CoA synthetase [EC:6.2.1.-]
COO91_05177	0.694893	6.39178	39.2944	8.51277e-06	7.86867e-05	499	543	427	1594	1477	1590	rre31, crr31, rpaA	two-component response regulator (OmpR subfamily)
COO91_06974	0.694591	4.83207	13.0836	0.0021301	0.00847491	171	179	146	379	478	720	none	hypothetical protein
COO91_06004	0.693953	4.29009	10.3778	0.00501385	0.0172121	100	100	121	319	446	243	none	hypothetical protein
COO91_01495	0.693424	5.16805	11.5742	0.00361556	0.0131501	199	210	227	551	874	568	none	Transposase%2C IS5 family
COO91_04504	0.693424	5.16805	11.5742	0.00361556	0.0131501	199	210	227	551	874	568	none	Transposase%2C IS5 family
COO91_07555	0.693424	5.16805	11.5742	0.00361556	0.0131501	199	210	227	551	874	568	none	Transposase%2C IS5 family
COO91_07813	0.693424	5.16805	11.5742	0.00361556	0.0131501	199	210	227	551	874	568	none	Transposase%2C IS5 family
COO91_09911	0.693399	1.89147	7.60958	0.0134308	0.0380497	25	22	22	67	87	64	none	hypothetical protein
COO91_09037	0.693344	3.5618	15.1163	0.00118334	0.00523865	61	53	61	205	165	189	none	hypothetical protein
COO91_08313	0.69324	5.74539	13.6891	0.00186963	0.0076597	219	196	188	647	649	618	none	Extracellular
COO91_02349	0.692854	4.85057	20.8395	0.000275208	0.00152919	136	163	149	483	525	403	none	DNA-binding response regulator%2C OmpR family%2C containings REC and winged-helix
COO91_00046	0.692638	2.77266	10.1291	0.0054507	0.0184397	32	49	31	133	110	111	none	hypothetical protein
COO91_00124	0.692091	5.37362	21.8319	0.000218963	0.00126464	160	182	176	552	617	462	none	Non-ribosomal peptide synthetase component F
COO91_07190	0.692088	4.11615	11.3576	0.00363803	0.013223	82	92	55	229	283	206	pbpB	penicillin-binding protein 2
COO91_06941	0.691765	3.68296	14.8956	0.0012588	0.005523	82	78	72	237	275	220	paaK	phenylacetate-CoA ligase [EC:6.2.1.30]
COO91_04334	0.691728	5.61442	28.7467	5.19042e-05	0.000373296	294	320	257	856	945	948	serS	seryl-tRNA synthetase
COO91_02030	0.691629	2.93035	8.17881	0.0108508	0.0320288	33	37	47	131	117	124	none	hypothetical protein
COO91_05881	0.691285	5.85425	25.8582	9.19154e-05	0.000597727	234	266	235	641	818	858	none	hypothetical protein
COO91_03245	0.691178	5.99166	18.925	0.000435842	0.00226045	348	317	382	931	1289	1083	none	PAS domain
COO91_03692	0.691149	4.71377	13.8091	0.00171846	0.00712122	163	169	131	490	599	361	none	hypothetical protein
COO91_02727	0.689647	4.40331	18.4219	0.000493959	0.00251251	89	106	112	330	269	378	nblB	phycocyanin alpha phycocyanobilin lyase related protein
COO91_01150	0.688986	5.54431	25.3766	0.0001015	0.000651623	189	249	218	710	749	600	none	hypothetical protein
COO91_10013	0.688388	6.19247	40.0054	7.63397e-06	7.17275e-05	369	391	405	1316	1136	1243	none	Transposase
COO91_01721	0.688313	4.40433	21.0945	0.000259353	0.00145604	95	144	101	364	367	335	-	putative hydrolases of HD superfamily
COO91_10830	0.687736	4.70113	18.1633	0.000527184	0.00265407	123	169	174	435	550	476	none	Tetratricopeptide
COO91_06101	0.687081	2.35743	8.86413	0.00845871	0.0263319	27	29	21	83	91	68	none	hypothetical protein
COO91_01323	0.684784	3.95971	16.9766	0.000715527	0.00341719	77	74	80	271	222	239	none	putative protein YjbI%2C containings pentapeptide repeats
COO91_06037	0.684438	3.78261	9.81392	0.00606737	0.0200958	49	43	58	152	135	190	pstS	phosphate transport system substrate-binding protein
COO91_04362	0.683695	6.55967	9.90432	0.00744367	0.0237126	546	349	427	1138	1776	1234	none	Periplasmic component of the Tol biopolymer transport system
COO91_02145	0.683105	4.93372	20.4015	0.000305051	0.00166978	139	145	157	500	422	473	none	Chromosome partitioning ATPase%2C Mrp family%2C containings Fe-S cluster
COO91_06292	0.680566	2.20625	8.44983	0.00982344	0.0296098	22	21	14	64	52	64	none	ATPase involved in DNA repair
COO91_00551	0.680503	2.37956	7.11347	0.016258	0.0444723	17	27	31	98	55	85	PII	Nitrogen regulatory protein PII
COO91_09964	0.680473	4.30567	13.4962	0.00188389	0.00770643	137	128	111	344	478	350	parB	chromosome partitioning protein, ParB family
COO91_09364	0.680282	2.89851	9.60663	0.0065158	0.0212559	41	27	38	122	94	121	none	Hemolysin activation/secretion protein
COO91_06816	0.678292	3.40084	9.00409	0.00804717	0.02535	29	65	58	174	160	140	pyrR	pyrimidine operon attenuation protein / uracil phosphoribosyltransferase [EC:2.4.2.9]
COO91_10311	0.677686	2.15655	7.45949	0.0142225	0.0399233	20	17	18	66	59	48	none	Arc-type ribbon-helix-helix
COO91_05786	0.676753	1.96099	7.5403	0.0137898	0.0389208	14	23	16	58	52	56	none	hypothetical protein
COO91_04713	0.676405	4.03113	16.3737	0.00083942	0.00393328	87	101	65	268	271	250	leuB	3-isopropylmalate dehydrogenase
COO91_04617	0.674857	4.35634	16.8755	0.000734787	0.0034929	119	104	112	306	388	353	none	Transposase%2C IS4-like
COO91_08314	0.673986	5.13046	10.8642	0.00443053	0.0155449	187	127	136	426	568	410	none	LysM repeat
COO91_09943	0.673051	2.98392	9.66956	0.00637585	0.0209064	60	44	40	157	149	146	none	fdxN element excision controlling factor protein
COO91_07654	0.672409	7.23612	44.2826	4.07667e-06	4.19448e-05	864	810	813	2625	2417	2767	none	SRSO17 transposase
COO91_08342	0.671703	5.12908	18.9479	0.000433383	0.00225201	197	165	156	475	555	590	none	hypothetical protein
COO91_03859	0.671374	3.23338	8.8843	0.00839796	0.0261657	47	59	53	207	155	135	none	hypothetical protein
COO91_06436	0.671299	5.28142	16.1911	0.000881548	0.00409523	231	207	247	786	731	628	none	hypothetical protein
COO91_01892	0.671176	4.55154	15.1422	0.00117485	0.00520743	149	149	102	431	421	394	none	Ca2+-binding protein%2C RTX toxin-related
COO91_00478	0.670139	3.64227	9.3427	0.00714195	0.0229595	68	63	66	249	206	161	E3.1.4.46	glycerophosphoryl diester phosphodiesterase [EC:3.1.4.46]
COO91_08833	0.670091	3.71997	10.4663	0.00486795	0.0167965	90	88	47	216	217	269	E3.8.1.2	2-haloacid dehalogenase [EC:3.8.1.2]
COO91_08806	0.669555	2.49132	7.46631	0.0141854	0.0398604	27	26	30	89	92	78	none	Glutathionylspermidine synthase
COO91_06662	0.668923	3.85267	14.3663	0.00146271	0.00623813	59	83	65	210	194	241	none	Aldo/keto reductase/potassium channel subunit beta
COO91_04973	0.668747	2.68991	8.07282	0.0112853	0.033023	24	31	18	93	65	70	pilB	type IV pilus assembly protein PilB
COO91_02534	0.668182	2.72216	6.81111	0.0183112	0.048853	33	35	27	111	98	87	radC	DNA repair protein RadC
COO91_08234	0.667992	3.30184	14.2296	0.00152126	0.00644467	43	50	35	137	113	150	none	ATPase involved in DNA repair
COO91_08363	0.66786	4.68212	17.7272	0.00058904	0.00290866	155	167	126	485	428	484	none	putative ATPase%2C archaeal AAA+ ATPase superfamily
COO91_00429	0.6667	5.49768	23.6342	0.000146806	0.000890212	281	297	232	896	796	830	none	Amino acid transporter
COO91_11162	0.666464	6.48164	31.6365	3.03932e-05	0.000235487	494	590	488	1749	1244	1933	none	Superfamily II DNA or RNA helicase
COO91_04902	0.665797	2.82248	8.37111	0.01011	0.0302798	43	31	36	110	122	111	none	Tfp pilus assembly protein PilW
COO91_00475	0.665503	6.93814	46.1774	3.13179e-06	3.31377e-05	605	625	574	1911	1698	2022	none	Multidrug efflux pump subunit AcrA
COO91_04906	0.665378	4.0644	17.1593	0.000682145	0.00328303	77	108	97	283	309	280	none	Glycosyltransferase%2C catalytic subunit of cellulose synthase and poly-beta-1%2C6-N-acetylglucosamine synthase
COO91_01600	0.665191	5.75416	12.0438	0.00312432	0.0116452	158	257	224	753	414	839	livG	branched-chain amino acid transport system ATP-binding protein
COO91_07563	0.664636	3.33707	9.31634	0.00720811	0.0231172	32	48	57	121	156	147	bioD	dethiobiotin synthetase [EC:6.3.3.3]
COO91_06746	0.664555	3.00916	9.41745	0.00695796	0.0224681	36	50	40	146	135	109	none	Endonuclease%2C Uma2 family
COO91_08365	0.663976	4.44804	16.7144	0.000766703	0.00363027	139	125	132	410	455	363	none	Serine/threonine protein kinase
COO91_05447	0.663744	6.21165	24.254	0.000128505	0.000796187	419	367	339	1094	1261	1134	none	Signal transduction histidine kinase
COO91_03968	0.663013	3.81743	15.2208	0.00114943	0.0051136	83	63	66	235	219	207	none	Protein of unknown function DUF3445
COO91_05747	0.662001	4.03325	14.2187	0.00152603	0.00646234	58	91	83	227	195	300	ABC-2.A	ABC-2 type transport system ATP-binding protein
COO91_02537	0.661611	3.36945	10.9091	0.00420658	0.0149039	48	49	56	202	118	160	hisG	ATP phosphoribosyltransferase [EC:2.4.2.17]
COO91_01235	0.661379	3.54548	15.7505	0.000993362	0.00453247	73	91	67	258	220	238	cpeC	phycoerythrin-associated linker protein
COO91_01603	0.661323	4.47527	15.0318	0.00121161	0.00533978	120	99	101	317	360	315	none	Endonuclease%2C Uma2 family
COO91_06155	0.661131	4.23315	12.3443	0.00266734	0.0102526	73	124	71	329	212	290	none	CheY chemotaxis protein or a CheY-like REC
COO91_04764	0.661029	4.36163	17.2719	0.000662442	0.00320244	100	116	122	365	314	373	plsY	glycerol-3-phosphate acyltransferase PlsY [EC:2.3.1.15]
COO91_11210	0.66095	3.06062	12.1031	0.00287436	0.0108518	64	58	50	210	151	176	none	Protein of unknown function DUF2811
COO91_04310	0.660888	5.27465	28.2276	5.7355e-05	0.000405229	189	240	210	626	680	666	none	WD40 repeat
COO91_06823	0.660633	5.58692	27.0719	7.19498e-05	0.000490419	150	184	175	568	443	574	none	hypothetical protein
COO91_02186	0.660358	6.14628	12.0461	0.0033003	0.0121712	371	342	364	992	1423	891	none	K+-sensing histidine kinase KdpD
COO91_09149	0.659847	4.34904	14.5536	0.00138657	0.00597226	90	75	87	281	188	323	none	hypothetical protein
COO91_02358	0.659727	3.11757	10.2605	0.00521475	0.017761	32	40	29	124	77	114	none	Na+/H+ antiporter NhaD or related arsenite permease
COO91_10224	0.658711	5.58578	10.3088	0.00513095	0.0175471	35	44	32	102	114	127	none	Non-ribosomal peptide synthetase component F
COO91_00644	0.658472	2.75548	6.87955	0.0178218	0.0478193	37	32	24	120	79	91	none	Transposase%2C IS5 family
COO91_09382	0.657072	6.27168	37.1799	1.1872e-05	0.000104474	393	419	430	1371	1185	1298	none	Transposase
COO91_07095	0.656262	3.14374	8.16271	0.0109156	0.0321814	46	46	50	152	161	125	kdpC	K+-transporting ATPase ATPase C chain [EC:3.6.3.12]
COO91_09132	0.655405	8.88922	9.32284	0.00932457	0.0284147	2999	2881	2872	7757	12327	6542	none	Transposase
COO91_09145	0.655405	8.88922	9.32284	0.00932457	0.0284147	2999	2881	2872	7757	12327	6542	none	Transposase
COO91_09161	0.655354	8.8892	9.31934	0.00933482	0.02843	2999	2881	2872	7757	12327	6541	none	Transposase
COO91_00550	0.654439	4.42573	17.8304	0.000573691	0.00285238	112	135	107	322	339	431	cynT_2	carbonic anhydrase [EC:4.2.1.1]
COO91_09307	0.653982	4.2194	10.6626	0.00456126	0.0158903	83	103	68	227	227	330	none	IS4 transposase
COO91_02529	0.653544	2.97826	8.71848	0.00891243	0.0274135	33	31	21	82	100	79	none	Cytochrome c%2C mono- and diheme variants
COO91_00876	0.651769	4.21755	12.7079	0.0023861	0.00933063	104	117	102	269	402	314	none	Spore coat polysaccharide biosynthesis protein SpsF%2C cytidylyltransferase family
COO91_02585	0.651757	10.0571	26.4157	8.20629e-05	0.00054294	4443	6428	5199	17001	12589	20101	sigA	transcription initiation factor sigma
COO91_03605	0.651142	4.14464	10.7727	0.00439882	0.0154637	128	141	159	380	504	427	devC	heterocyst specific ABC-transporter, membrane spanning subunit
COO91_07662	0.650917	3.18246	7.34046	0.0148881	0.0414585	37	36	35	110	140	80	none	Acyl-CoA synthetase
COO91_08694	0.650461	2.90915	6.99644	0.01702	0.0461136	33	54	27	138	101	111	none	Catechol 2%2C3-dioxygenase or other lactoylglutathione lyase family enzyme
COO91_05650	0.650155	7.59262	38.9931	8.91882e-06	8.19502e-05	852	1107	1026	3221	2568	3430	E3.4.21.102	carboxyl-terminal processing protease [EC:3.4.21.102]
COO91_09077	0.649767	4.33162	21.6325	0.000229142	0.00131787	81	93	83	288	226	280	none	Transposase
COO91_08440	0.649075	3.66456	9.69557	0.00631898	0.0207688	46	68	68	174	144	245	none	putative transposase YbfD/YdcC associated with H repeats
COO91_00466	0.648829	4.1791	14.4393	0.0014325	0.00613591	103	86	115	385	265	295	none	Endonuclease%2C Uma2 family
COO91_06190	0.647856	4.8336	10.7978	0.00436276	0.0153619	130	153	126	330	535	374	none	ABC-type sugar transport system%2C permease component
COO91_06423	0.647729	4.15859	11.4631	0.00351719	0.0128572	90	79	63	211	231	272	none	Threonine dehydrogenase or related Zn-dependent dehydrogenase
COO91_00786	0.647636	2.97595	10.9081	0.00420791	0.0149039	31	36	35	106	108	99	trpA	tryptophan synthase alpha chain
COO91_06873	0.647354	3.76822	8.69644	0.00898347	0.0276085	69	70	77	185	294	177	none	hypothetical protein
COO91_04359	0.647333	4.98849	20.1885	0.000320862	0.00173911	179	172	184	543	582	517	none	DNA anti-recombination protein
COO91_00002	0.647224	8.77653	10.5858	0.00596511	0.01983	2786	2610	2678	7242	11022	6215	none	Transposase
COO91_00055	0.647224	8.77653	10.5858	0.00596511	0.01983	2786	2610	2678	7242	11022	6215	none	Transposase
COO91_00020	0.647224	8.77651	10.5869	0.00596309	0.01983	2786	2610	2678	7242	11022	6215	none	Transposase
COO91_01026	0.647224	8.77651	10.5869	0.00596309	0.01983	2786	2610	2678	7242	11022	6215	none	Transposase
COO91_01337	0.647224	8.77651	10.5869	0.00596309	0.01983	2786	2610	2678	7242	11022	6215	none	Transposase
COO91_01874	0.647224	8.77651	10.5869	0.00596309	0.01983	2786	2610	2678	7242	11022	6215	none	Transposase
COO91_07693	0.647224	8.77651	10.5869	0.00596309	0.01983	2786	2610	2678	7242	11022	6215	none	Transposase
COO91_01011	0.647168	8.77649	10.5826	0.00597085	0.0198308	2786	2610	2678	7242	11022	6214	none	Transposase
COO91_03439	0.647168	8.77649	10.5826	0.00597085	0.0198308	2786	2610	2678	7242	11022	6214	none	Transposase
COO91_07731	0.647168	8.77649	10.5826	0.00597085	0.0198308	2786	2610	2678	7242	11022	6214	none	Transposase
COO91_08899	0.64652	4.50377	9.59541	0.00654113	0.0213128	100	82	96	250	359	239	none	PKD repeat
COO91_03586	0.646434	5.42324	26.5032	8.06261e-05	0.00053474	183	172	196	595	546	557	none	putative protein YoxC%2C containings an MCP-like domain
COO91_00038	0.646355	8.7737	10.5461	0.00603712	0.0200262	2788	2605	2677	7237	11006	6211	none	Transposase
COO91_04907	0.646176	2.83943	10.6325	0.00460692	0.0160287	36	43	31	121	92	126	none	Tfp pilus assembly protein FimT
COO91_08197	0.645818	3.08661	11.9532	0.00301213	0.0112697	45	49	49	157	109	177	none	UDP:flavonoid glycosyltransferase YjiC%2C YdhE family
COO91_02137	0.645773	3.27979	8.31475	0.010321	0.0307331	38	48	56	140	134	163	none	Glycosyltransferase%2C catalytic subunit of cellulose synthase and poly-beta-1%2C6-N-acetylglucosamine synthase
COO91_00652	0.644967	3.65319	14.0504	0.00160201	0.00672622	62	71	58	169	200	215	pixJ	methyl-accepting chemotaxis protein PixJ
COO91_08364	0.643934	7.35066	43.0766	4.8428e-06	4.9081e-05	1033	1129	1040	3216	3348	3225	none	Serine/threonine protein kinase
COO91_04576	0.643816	5.68697	13.983	0.00163361	0.00682975	295	264	293	748	1077	767	none	GTPase%2C G3E family
COO91_03970	0.643539	5.69237	25.851	9.20494e-05	0.000598045	236	252	213	670	603	885	none	Neuraminidase
COO91_01631	0.643444	3.57075	11.2785	0.00373166	0.0135315	45	41	49	126	154	133	none	hypothetical protein
COO91_08668	0.642425	3.27978	11.5953	0.00337218	0.0123982	50	61	60	175	192	154	rluA	tRNA pseudouridine32 synthase / 23S rRNA pseudouridine746 synthase [EC:5.4.99.28 5.4.99.29]
COO91_05355	0.642234	4.08638	9.41639	0.00696053	0.0224697	114	99	60	267	304	261	none	hypothetical protein
COO91_05038	0.640082	2.71072	7.5922	0.0135199	0.0382785	44	25	31	122	90	97	none	Phosphatidylserine/phosphatidylglycerophosphate/cardiolipin synthase
COO91_04143	0.63983	5.38747	12.5373	0.0025146	0.00976605	278	189	239	686	846	625	none	GTPase SAR1 family domain
COO91_07501	0.639606	4.35712	13.6792	0.00178507	0.0073634	121	135	89	324	402	318	none	Peptidoglycan/xylan/chitin deacetylase%2C PgdA/CDA1 family
COO91_06334	0.639572	3.53651	11.436	0.00354789	0.0129475	42	46	66	169	137	168	ldcA	muramoyltetrapeptide carboxypeptidase [EC:3.4.17.13]
COO91_05071	0.637723	4.70275	8.92045	0.00837854	0.0261467	103	113	97	373	172	426	none	IS4 transposase
COO91_10277	0.636628	9.84667	24.5215	0.000121407	0.000758721	5994	6743	6878	18073	22698	18620	none	Serine/threonine protein kinase
COO91_08474	0.636416	3.63368	10.3041	0.005139	0.0175638	68	59	57	224	135	209	none	Ribonuclease HI
COO91_06524	0.636072	4.35113	14.3567	0.00146676	0.00625048	85	116	82	333	254	275	none	Lysophospholipase%2C alpha-beta hydrolase superfamily
COO91_01246	0.635369	3.47568	7.70082	0.012974	0.0371191	47	70	50	139	160	208	none	WD40 repeat
COO91_02982	0.635271	7.26262	26.2456	8.4937e-05	0.00055888	831	767	818	2232	2695	2418	gltA	citrate synthase
COO91_03576	0.634626	3.19441	9.50424	0.00675105	0.0219176	54	48	54	146	188	139	none	Putative heme iron utilization protein
COO91_04904	0.633607	4.13592	9.19745	0.00751537	0.0238903	93	104	92	239	369	261	none	Glycosyltransferase%2C GT2 family
COO91_07244	0.632342	6.35113	32.5683	2.57561e-05	0.000203641	399	442	440	1340	1328	1220	none	Tetratricopeptide
COO91_07751	0.631892	2.23392	7.61867	0.0133844	0.0379746	20	32	28	92	76	75	none	Large exoprotein involved in heme utilization or adhesion
COO91_02651	0.631637	3.57054	7.0984	0.016354	0.0446783	67	76	68	187	286	159	none	Periplasmic protein refolding chaperone Spy/CpxP family
COO91_10839	0.631506	4.09346	13.0799	0.00213249	0.00847671	94	92	72	234	289	257	none	hypothetical protein
COO91_09928	0.630981	3.15418	8.53036	0.00953973	0.028919	47	49	33	109	150	130	none	hypothetical protein
COO91_09687	0.630731	5.40725	26.5331	8.01423e-05	0.000532184	242	265	196	769	642	726	none	Site-specific DNA recombinase related to the DNA invertase Pin
COO91_09684	0.629814	3.68289	10.1115	0.00548317	0.0185179	46	64	50	191	114	184	none	Transposase
COO91_03759	0.62978	5.26513	15.8469	0.000967608	0.00443437	183	207	169	551	418	741	atpD	F-type H+-transporting ATPase subunit delta
COO91_02572	0.629333	2.39747	8.37298	0.0101031	0.0302679	23	36	22	79	77	89	none	hypothetical protein
COO91_02530	0.629045	3.32043	9.4418	0.0068992	0.0223116	34	37	25	103	105	82	none	2%2C4-dienoyl-CoA reductase or related NADH-dependent reductase
COO91_09978	0.62897	4.21087	10.9742	0.00411811	0.0146421	83	64	81	251	159	293	none	hypothetical protein
COO91_09685	0.628683	7.8656	32.5892	2.56617e-05	0.000203043	1380	1288	1334	3979	4280	3870	none	SRSO17 transposase
COO91_10353	0.62855	3.72183	14.5022	0.00140703	0.00604832	51	67	53	197	135	189	none	Transposase
COO91_05566	0.627874	4.03449	11.2676	0.00374482	0.0135571	109	112	120	329	373	329	none	Nitroreductase
COO91_11199	0.627748	5.92359	19.7991	0.000352202	0.00188165	355	387	369	1087	1292	963	none	hypothetical protein
COO91_08431	0.626965	3.62536	10.2652	0.0052066	0.0177388	54	57	74	157	218	183	none	Mobile element protein
COO91_09557	0.626768	7.23366	17.6976	0.000593525	0.00292413	821	610	799	2125	2476	2170	parB	chromosome partitioning protein, ParB family
COO91_05998	0.62515	4.19674	16.911	0.000727962	0.00346807	52	65	69	196	172	196	none	Tellurite resistance protein
COO91_03198	0.625008	4.5571	12.305	0.00269985	0.0103335	134	111	136	353	461	334	none	hypothetical protein
COO91_02081	0.624699	3.7338	7.04261	0.0167146	0.0455257	71	107	49	203	271	201	none	DNA-binding transcriptional regulator%2C MocR family%2C containings an aminotransferase domain
COO91_01093	0.623428	2.83677	8.69418	0.00899076	0.0276152	33	55	51	152	116	153	none	Asp-tRNAAsn/Glu-tRNAGln amidotransferase A subunit or related amidase
COO91_02887	0.623239	4.12096	14.3638	0.00146379	0.00624028	97	90	114	295	331	283	none	Endonuclease%2C Uma2 family
COO91_00289	0.622805	4.04728	8.96366	0.00816369	0.0256573	107	69	75	260	266	235	none	Glycogen synthase
COO91_07491	0.622635	6.88733	34.8147	1.75052e-05	0.000146314	648	670	648	2059	1975	1903	none	Amino acid transporter
COO91_03465	0.62252	2.58199	6.8186	0.0182569	0.048733	35	26	35	100	100	91	none	hypothetical protein
COO91_09963	0.62226	4.28472	10.7082	0.00449327	0.0157039	142	112	113	345	417	344	parA	chromosome partitioning protein
COO91_06036	0.620892	7.24533	13.9178	0.00180279	0.00742223	601	663	672	1792	2454	1524	ycf44	c-type cytochrome biogenesis protein Ccs1
COO91_07426	0.620742	5.03236	21.5222	0.000235001	0.00134585	167	192	157	524	452	584	none	DNA uptake protein ComE and related DNA-binding proteins
COO91_00047	0.619459	4.45562	14.3818	0.00145626	0.00621305	128	109	108	350	389	298	none	Superfamily II DNA or RNA helicase%2C SNF2 family
COO91_07207	0.619399	3.53272	8.51005	0.00961043	0.029095	27	51	56	145	131	127	GLYK	D-glycerate 3-kinase [EC:2.7.1.31]
COO91_01598	0.619111	5.68923	16.1848	0.000883057	0.00409872	175	283	211	738	489	795	none	Endonuclease%2C Uma2 family
COO91_10097	0.619083	4.59829	16.2708	0.000862886	0.00401543	140	123	137	376	438	390	none	Transposase%2C IS4-like
COO91_01761	0.618766	6.89006	12.166	0.00317643	0.0117826	545	822	475	2224	1314	2020	none	hypothetical protein
COO91_04363	0.618738	5.43946	17.3526	0.000648721	0.00314877	212	177	206	576	662	553	none	putative membrane protein YcgQ%2C UPF0703/DUF1980 family
COO91_06218	0.618478	4.38843	12.8161	0.00230903	0.00906528	92	109	107	322	329	273	none	CheY chemotaxis protein or a CheY-like REC
COO91_09472	0.618429	7.16476	27.7074	6.34694e-05	0.000439535	705	690	752	1990	2289	2179	none	Glutamate-1-semialdehyde aminotransferase
COO91_05999	0.618235	5.04058	15.0054	0.00122062	0.00537072	98	134	109	414	243	377	none	hypothetical protein
COO91_06245	0.617931	4.38918	15.6157	0.00103069	0.00467177	88	97	110	326	259	308	none	putative membrane protein
COO91_06737	0.614718	7.30615	21.4769	0.000237455	0.00135417	486	561	744	1900	1603	1911	none	Glycosyltransferase involved in cell wall bisynthesis
COO91_10218	0.614395	4.41951	11.9693	0.00299695	0.0112207	96	108	136	299	401	315	none	Mobile element protein
COO91_05760	0.613586	4.64373	7.81756	0.0127571	0.0366171	104	150	142	376	520	273	ftsQ	cell division protein FtsQ
COO91_00188	0.613184	4.88537	14.6663	0.00134293	0.00583301	167	163	170	557	526	416	none	3'%2C5'-cyclic AMP phosphodiesterase CpdA
COO91_08714	0.613135	2.66058	8.50207	0.00963835	0.0291412	31	27	27	83	91	81	none	putative arabinose efflux permease%2C MFS family
COO91_09093	0.61251	4.48089	11.1699	0.00386475	0.0139162	118	135	96	359	415	261	none	hypothetical protein
COO91_10622	0.612126	5.32273	22.4051	0.000192417	0.00112458	196	182	196	585	504	644	none	Tetratricopeptide
COO91_05866	0.61212	5.71746	20.5774	0.000292654	0.001613	183	143	165	501	446	537	none	putative pyrophosphatase or phosphodiesterase%2C AlkP superfamily
COO91_07378	0.612048	5.78706	16.7296	0.000763626	0.00361886	131	132	192	459	430	483	none	hypothetical protein
COO91_00646	0.611943	6.42794	29.5865	4.42706e-05	0.000325755	373	332	382	1131	1026	1120	tamB	translocation and assembly module TamB
COO91_00028	0.611153	3.25992	11.1181	0.00393009	0.0140858	48	50	37	152	116	138	none	P-loop containing nucleoside triphosphate hydrolase
COO91_00089	0.611153	3.25992	11.1181	0.00393009	0.0140858	48	50	37	152	116	138	none	hypothetical protein
COO91_02944	0.610548	3.97811	13.2197	0.00204512	0.00822608	64	74	80	224	225	203	none	hypothetical protein
COO91_00097	0.610496	5.64054	21.1603	0.000255424	0.00143771	224	233	221	622	607	809	none	Transposase
COO91_06097	0.609873	4.79918	8.10419	0.0111547	0.0327293	53	27	43	127	133	110	none	hypothetical protein
COO91_06874	0.608551	5.05939	15.8002	0.000979997	0.00448141	147	205	165	485	563	484	none	Endonuclease%2C Uma2 family
COO91_10673	0.608513	3.99913	15.2471	0.00114107	0.00508268	72	96	89	278	243	247	parB	chromosome partitioning protein, ParB family
COO91_02523	0.607792	3.06846	7.62271	0.0133639	0.0379264	41	40	32	110	81	150	none	hypothetical protein
COO91_04769	0.607141	4.9578	17.7157	0.000590773	0.00291455	136	154	128	396	423	426	none	hypothetical protein
COO91_06219	0.60682	4.27464	11.4257	0.00355955	0.0129857	111	97	101	284	368	266	OGT	protein O-GlcNAc transferase [EC:2.4.1.255]
COO91_09608	0.60655	3.81752	9.20024	0.00750798	0.0238738	79	59	67	180	229	203	none	ABC-type putative transport system involved in gliding motility%2C auxiliary component
COO91_02345	0.60589	3.06986	11.8153	0.00314544	0.0116957	48	55	44	158	128	154	ureB	urease subunit beta [EC:3.5.1.5]
COO91_01574	0.605338	3.57103	11.2914	0.00371628	0.0134847	62	74	69	214	220	175	none	Catechol 2%2C3-dioxygenase or other lactoylglutathione lyase family enzyme
COO91_02146	0.604875	3.55351	8.10103	0.0111678	0.0327588	53	64	67	189	224	131	none	Glycosyltransferase involved in cell wall bisynthesis
COO91_10041	0.604804	5.22855	9.32837	0.00743006	0.0236956	217	232	243	564	889	586	none	Transposase%2C IS5 family
COO91_00848	0.603962	6.12995	7.53169	0.0161592	0.0442915	466	311	370	953	1473	975	none	Harbinger transposase-derived nuclease domain
COO91_07808	0.603852	3.63063	9.43849	0.00690716	0.022324	54	58	76	157	218	183	none	Transposase%2C Helix-turn-helix domain
COO91_06789	0.603411	6.66369	31.1154	3.33892e-05	0.00025469	351	400	401	1259	938	1259	none	GAF domain-like
COO91_05082	0.602983	4.01012	9.30459	0.00723784	0.0231851	82	100	74	251	313	189	none	hypothetical protein
COO91_09591	0.602815	4.52522	10.1888	0.00534206	0.0181318	86	121	144	373	344	328	none	Signal transduction histidine kinase
COO91_04752	0.602559	6.67104	31.8099	2.94636e-05	0.000228612	354	447	440	1205	1213	1271	crtR	beta-carotene hydroxylase [EC:1.14.13.-]
COO91_02654	0.602491	5.28737	18.9319	0.000435096	0.00225766	191	229	203	643	646	558	none	Protein of unknown function DUF2839
COO91_01779	0.602166	7.77188	34.3033	1.90843e-05	0.000157566	1132	1298	1112	3464	3660	3372	acsF	magnesium-protoporphyrin IX monomethyl ester (oxidative) cyclase [EC:1.14.13.81]
COO91_04483	0.601929	6.57468	10.4078	0.00559041	0.0187921	449	436	382	1112	1644	965	none	hypothetical protein
COO91_01164	0.601827	3.7309	8.76578	0.00876214	0.0270049	50	75	70	178	152	253	none	putative transposase YbfD/YdcC associated with H repeats
COO91_08149	0.601515	6.13308	7.40433	0.016907	0.0458995	471	310	370	957	1474	977	none	Harbinger transposase-derived nuclease domain
COO91_05203	0.601367	4.14889	12.2135	0.00277745	0.0105707	89	120	106	304	346	280	none	4-amino-4-deoxy-L-arabinose transferase or related glycosyltransferase of PMT family
COO91_00142	0.601351	3.89491	10.898	0.00422191	0.0149438	64	76	87	209	265	197	murG	UDP-N-acetylglucosamine--N-acetylmuramyl-(pentapeptide) pyrophosphoryl-undecaprenol N-acetylglucosamine transferase [EC:2.4.1.227]
COO91_04610	0.601287	3.94594	7.01436	0.0169046	0.0458995	98	95	104	280	364	233	none	Thiol-disulfide isomerase or thioredoxin
COO91_01823	0.601014	3.9223	12.3505	0.00266223	0.0102439	71	84	109	256	239	294	exbB	biopolymer transport protein
COO91_05174	0.600739	6.14215	7.30232	0.0175352	0.0471789	475	310	374	957	1487	986	none	Harbinger transposase-derived nuclease domain
COO91_08531	0.600469	6.13328	7.27512	0.0177072	0.0475827	471	310	370	953	1477	975	none	Harbinger transposase-derived nuclease domain
COO91_00569	0.600265	4.77361	16.1203	0.00089854	0.00415632	92	119	112	331	269	364	sigC	RNA polymerase group 2 sigma subunit
COO91_00763	0.60016	3.24616	6.92366	0.0175143	0.0471412	34	51	32	118	77	155	none	CheY chemotaxis protein or a CheY-like REC
COO91_05526	0.600128	4.94609	17.8059	0.000577299	0.00286505	177	191	177	549	506	568	none	hypothetical protein
COO91_00720	0.59994	6.13236	7.32927	0.0173666	0.0468418	471	310	371	955	1476	976	none	Harbinger transposase-derived nuclease domain
COO91_06999	0.599679	4.45452	15.1173	0.00118303	0.00523865	110	132	96	371	248	392	miaE	tRNA-(ms[2]io[6]A)-hydroxylase [EC:1.-.-.-]
COO91_04133	0.598817	3.17581	9.85907	0.00597439	0.0198364	48	71	59	192	136	203	none	hypothetical protein
COO91_01384	0.598737	6.13252	7.28523	0.017643	0.0474337	471	310	371	953	1476	975	none	Harbinger transposase-derived nuclease domain
COO91_07851	0.598631	6.13205	7.3174	0.0174406	0.0469829	471	310	371	955	1474	975	none	Harbinger transposase-derived nuclease domain
COO91_08814	0.598345	3.884	11.6282	0.00333719	0.0122863	106	91	65	264	261	253	none	hypothetical protein
COO91_05225	0.597951	3.6336	8.56681	0.00941438	0.0286079	59	42	48	131	169	142	none	Cytosine/adenosine deaminase or related metal-dependent hydrolase
COO91_07689	0.597943	6.13135	7.30945	0.0174904	0.0470936	471	311	370	953	1474	975	none	Harbinger transposase-derived nuclease domain
COO91_10705	0.597855	4.6906	17.3725	0.000645391	0.00313542	122	143	118	402	361	373	none	Lhr-like helicase
COO91_03813	0.59777	6.13946	23.3738	0.000155355	0.000936284	279	270	338	859	868	915	none	putative protein YjbI%2C containings pentapeptide repeats
COO91_11099	0.597657	4.08916	9.81672	0.00606156	0.0200951	116	82	100	286	316	285	none	ATPase involved in DNA repair
COO91_07238	0.597295	4.97801	18.8111	0.000448295	0.00231395	183	215	193	548	645	549	none	hypothetical protein
COO91_08154	0.597194	6.13296	7.33438	0.0173348	0.0467911	470	312	371	953	1474	976	none	Harbinger transposase-derived nuclease domain
COO91_06657	0.59701	5.6513	26.4907	8.08305e-05	0.000535768	284	265	282	848	801	824	none	ATPase/GTPase%2C AAA15 family
COO91_05565	0.596638	4.07935	7.14344	0.0161566	0.0442915	132	127	94	278	462	292	none	Ankyrin repeat
COO91_01095	0.596169	5.38218	15.1776	0.00116331	0.00516687	255	311	330	1005	790	871	Dur1	urea carboxylase [EC:6.3.4.6]
COO91_00199	0.596005	4.4075	14.485	0.00141394	0.00607321	123	115	122	352	307	416	none	Endonuclease%2C Uma2 family
COO91_03654	0.595786	4.4575	10.089	0.00552512	0.0186189	68	90	105	320	184	284	vanY	D-alanyl-D-alanine carboxypeptidase [EC:3.4.16.4]
COO91_04815	0.594844	5.80974	9.63738	0.00652315	0.021267	91	99	122	279	382	256	none	DNA-directed RNA polymerase specialized sigma subunit%2C sigma24 family
COO91_09252	0.594611	4.68338	15.025	0.00121393	0.00534781	152	134	147	400	468	413	none	Transposase%2C IS4-like
COO91_00321	0.594575	6.14891	7.17288	0.0183717	0.0489913	474	311	373	956	1480	976	none	Harbinger transposase-derived nuclease domain
COO91_10225	0.593903	4.60134	13.2155	0.00204765	0.00823321	57	68	63	209	138	214	none	Acyl carrier protein
COO91_07832	0.59326	3.36905	7.66351	0.0131586	0.0374235	55	57	31	154	103	169	none	Ribonuclease HI
COO91_06631	0.591655	5.42247	19.1533	0.000412025	0.00215239	164	256	240	680	585	684	none	Glycosyltransferase involved in cell wall bisynthesis
COO91_01602	0.590767	4.25001	14.4758	0.00141765	0.00608672	78	80	104	267	248	262	livF	branched-chain amino acid transport system ATP-binding protein
COO91_11183	0.590667	5.56685	11.2842	0.00373984	0.0135521	281	367	333	970	1154	739	none	2-polyprenyl-6-methoxyphenol hydroxylase and related FAD-dependent oxidoreductases
COO91_02772	0.590465	5.87879	9.63153	0.00691822	0.0223531	294	365	302	887	1219	686	argH	argininosuccinate lyase [EC:4.3.2.1]
COO91_00564	0.590208	4.09599	12.2767	0.00272359	0.010406	115	103	88	293	337	270	cikA	two-component system, sensor histidine kinase and response regulator [EC:2.7.13.3]
COO91_06656	0.589476	4.14304	11.3664	0.00362781	0.0131903	88	110	105	281	352	253	none	hypothetical protein
COO91_00780	0.589187	4.37305	7.9517	0.0118061	0.034352	59	70	50	148	227	146	tyrA	chorismate mutase / prephenate dehydrogenase [EC:5.4.99.5 1.3.1.12]
COO91_04115	0.588708	2.8124	8.07752	0.0112656	0.0329832	36	39	35	125	93	108	none	Acid phosphatase/vanadium-dependent haloperoxidase-related
COO91_04837	0.588444	3.76384	11.2578	0.0037567	0.0135813	61	74	61	169	206	200	none	Transposase
COO91_07413	0.5883	6.69034	10.5121	0.00529511	0.0180033	453	385	422	1198	1533	960	none	hypothetical protein
COO91_03761	0.587404	5.53279	18.0545	0.000541903	0.00271805	242	243	240	700	740	694	atpG	F-type H+-transporting ATPase subunit b
COO91_05412	0.587275	2.32105	6.76938	0.0186171	0.0495966	19	25	17	58	53	69	none	hypothetical protein
COO91_06630	0.587032	5.83696	10.3378	0.00525853	0.0179045	291	298	298	821	1101	663	none	putative Zn-dependent protease
COO91_06521	0.586875	5.79375	18.4519	0.000490263	0.00249488	285	224	254	780	751	727	E3.2.1.24	alpha-mannosidase [EC:3.2.1.24]
COO91_08488	0.586783	4.74488	13.8341	0.00170598	0.00708575	157	136	111	378	422	388	none	hypothetical protein
COO91_09910	0.586472	3.20754	8.13878	0.0110127	0.0324004	70	50	53	174	159	180	none	Ca2+-binding protein%2C EF-hand superfamily
COO91_05914	0.585977	3.53672	9.65798	0.00640133	0.0209773	58	45	66	164	168	168	none	putative ATPase%2C archaeal AAA+ ATPase superfamily
COO91_04970	0.585846	3.61164	9.60567	0.00651798	0.0212566	68	72	53	158	216	190	pilC	type IV pilus assembly protein PilC
COO91_04274	0.585727	6.4456	29.5751	4.43658e-05	0.000326233	417	462	377	1305	1150	1243	none	ABC-type phosphate transport system%2C periplasmic component
COO91_08938	0.58562	5.18669	13.3397	0.00197329	0.00799361	169	219	213	583	681	489	none	Protein-disulfide isomerase
COO91_05724	0.58435	4.87461	21.4205	0.000240549	0.00136821	140	147	147	419	395	466	none	hypothetical protein
COO91_01503	0.584168	4.58796	12.5135	0.00253207	0.0098189	123	169	123	376	440	393	none	Transposase%2C TnpA family
COO91_04917	0.583347	3.76927	11.2229	0.00379912	0.0137027	61	74	62	170	206	200	none	Transposase
COO91_08518	0.583336	3.75923	11.1219	0.00392519	0.0140776	61	74	61	169	205	199	none	Transposase
COO91_05085	0.583336	3.76143	11.1339	0.00391001	0.0140295	61	74	61	169	205	199	none	Transposase
COO91_04725	0.58301	3.58075	8.344	0.0102109	0.03048	73	67	65	230	203	170	none	Acetyltransferase
COO91_06079	0.582925	3.22929	7.49347	0.0140387	0.0395202	34	36	30	98	115	79	none	hypothetical protein
COO91_09958	0.582866	8.88645	8.18454	0.0130881	0.0373395	3131	2898	2955	7709	11794	6541	none	Transposase
COO91_06990	0.582678	5.18102	10.6897	0.00452065	0.0157742	131	172	155	533	275	554	none	hypothetical protein
COO91_09693	0.582548	8.88672	8.17814	0.0131165	0.0373811	3132	2899	2956	7710	11795	6542	none	Transposase
COO91_09902	0.582548	8.88672	8.17814	0.0131165	0.0373811	3132	2899	2956	7710	11795	6542	none	Transposase
COO91_09957	0.582548	8.88672	8.17814	0.0131165	0.0373811	3132	2899	2956	7710	11795	6542	none	Transposase
COO91_09752	0.582496	8.8867	8.17485	0.0131311	0.0373932	3132	2899	2956	7710	11795	6541	none	Transposase
COO91_09924	0.582496	8.8867	8.17485	0.0131311	0.0373932	3132	2899	2956	7710	11795	6541	none	Transposase
COO91_09930	0.582496	8.8867	8.17485	0.0131311	0.0373932	3132	2899	2956	7710	11795	6541	none	Transposase
COO91_05880	0.581859	5.91155	13.3519	0.00196615	0.0079773	250	263	275	734	916	646	none	hypothetical protein
COO91_05867	0.580704	5.00812	9.68407	0.00634405	0.0208211	107	78	74	297	179	295	none	Sugar phosphate isomerase/epimerase
COO91_06276	0.577861	3.83881	9.15089	0.00763968	0.0242143	74	80	68	188	252	205	none	Serine protease%2C subtilase family
COO91_08094	0.577486	3.92561	9.64164	0.00643752	0.0210511	71	67	95	234	250	198	none	AAA+-type ATPase%2C SpoVK/Ycf46/Vps4 family
COO91_09377	0.57533	5.31829	8.5497	0.00981338	0.029596	233	249	260	597	934	611	none	Transposase%2C IS5 family
COO91_02296	0.574405	5.12131	18.6462	0.000467033	0.00239468	145	158	160	491	393	475	cyaC	adenylate cyclase carring two-component hybrid sensor and regulator domains
COO91_07223	0.573814	4.43866	14.1716	0.00154689	0.00654554	96	129	86	317	308	277	acpD	FMN-dependent NADH-azoreductase [EC:1.7.-.-]
COO91_00081	0.57346	3.85858	6.88552	0.0177798	0.0477185	74	68	52	218	119	237	none	hypothetical protein
COO91_00452	0.572385	6.83679	16.364	0.000841597	0.00393667	634	546	616	1725	1951	1555	none	P-loop containing nucleoside triphosphate hydrolase
COO91_10014	0.57147	8.84515	8.41558	0.01191	0.0345893	3017	2828	2872	7486	11239	6356	none	Transposase
COO91_01067	0.571194	4.29622	9.6636	0.00638895	0.0209431	127	137	119	317	408	385	none	Large exoprotein involved in heme utilization or adhesion
COO91_06015	0.570817	6.6282	14.1683	0.00154833	0.00654904	438	353	379	1175	1290	938	none	hypothetical protein
COO91_06660	0.568665	6.92298	26.4742	8.10997e-05	0.000537224	555	695	557	1846	1583	1825	none	Serine protease%2C subtilase family
COO91_08078	0.568311	6.86066	14.8505	0.00127487	0.00557545	225	254	197	597	734	619	none	hypothetical protein
COO91_06629	0.56815	6.13427	10.5166	0.00495808	0.0170585	369	329	368	1005	1280	793	secG	preprotein translocase subunit SecG
COO91_10318	0.566935	4.52044	9.44914	0.00688159	0.0222613	131	99	110	302	390	293	none	Type IV secretory pathway%2C VirD2 components
COO91_07800	0.566371	3.45698	8.12004	0.0110893	0.0325994	77	60	50	177	184	183	ABC.X2.P	putative ABC transport system permease protein
COO91_05197	0.566264	5.01606	12.2484	0.00274759	0.0104836	149	144	178	397	517	450	rimM	16S rRNA processing protein RimM
COO91_02868	0.566049	4.79943	20.6732	0.000286134	0.00158258	161	166	159	506	439	470	none	Peroxiredoxin
COO91_00706	0.565102	3.41756	6.9651	0.0172309	0.0465569	60	51	59	193	128	178	avaIIIM	adenine-specific DNA-methyltransferase [EC:2.1.1.72]
COO91_07221	0.564854	5.37834	11.7123	0.00324943	0.0120185	248	174	149	579	491	601	none	Protein of unknown function DUF3153
COO91_05356	0.563571	6.14606	19.3228	0.000395292	0.00207499	338	364	345	923	1146	946	none	Glycosidase
COO91_07915	0.563435	3.42448	12.1986	0.0027903	0.0106047	62	72	65	192	165	222	none	hypothetical protein
COO91_07124	0.562464	6.26538	15.0083	0.00121962	0.00536852	337	343	267	1004	957	772	none	Cytochrome c peroxidase
COO91_01555	0.56239	3.68454	9.81448	0.00606621	0.0200958	60	74	57	234	145	177	none	DNA-binding transcriptional regulator%2C AcrR family
COO91_11027	0.562176	3.36683	9.25563	0.00736319	0.0235378	45	74	63	167	188	168	none	hypothetical protein
COO91_10874	0.561737	3.82717	8.3261	0.0102782	0.0306223	84	90	61	198	177	309	none	Ribonuclease HI
COO91_03782	0.561719	5.81856	14.4289	0.00143677	0.00614689	298	418	338	1130	779	1155	apcC	phycobilisome core linker protein
COO91_04716	0.559947	5.76751	18.7996	0.000449574	0.00231787	238	270	301	782	768	791	none	ABC-type Na+ efflux pump%2C permease component
COO91_05591	0.559444	3.83042	6.79161	0.0184534	0.0491848	128	127	113	295	473	281	hupB	hydrogenase expression/formation protein
COO91_05148	0.558865	4.85482	7.07906	0.0168197	0.045743	142	169	126	567	240	473	none	Transposase
COO91_08800	0.556804	6.70512	26.688	7.76842e-05	0.00052162	479	477	508	1422	1379	1432	recN	DNA repair protein
COO91_04185	0.555933	5.11781	15.3601	0.00110587	0.00495033	158	240	214	587	590	578	none	CheY chemotaxis protein or a CheY-like REC
COO91_09942	0.5552	3.17078	9.30747	0.00723054	0.0231705	54	56	65	193	161	152	none	fdxN element excision controlling factor protein
COO91_02430	0.555034	7.86892	35.9661	1.44576e-05	0.000124198	1248	1433	1211	3907	3354	3971	none	Nitrous oxidase accessory protein NosD%2C containings tandem CASH domains
COO91_05397	0.554807	4.71244	7.83431	0.012337	0.0356286	126	103	111	260	400	314	none	Tetratricopeptide
COO91_06864	0.552133	3.8288	11.1541	0.00388453	0.0139688	59	70	50	178	164	172	trkA	trk system potassium uptake protein
COO91_10664	0.551757	3.14015	8.1166	0.0111035	0.0326322	44	52	44	112	141	148	none	Ribonuclease HI
COO91_07540	0.551082	4.60412	7.74148	0.0127761	0.0366522	110	100	111	374	187	378	none	putative SAM-depedendent methyltransferase
COO91_06147	0.550869	3.77271	8.19848	0.0107723	0.0318428	52	66	64	184	139	203	none	NADPH:qui reductase or related Zn-dependent oxidoreductase
COO91_03597	0.549617	3.85117	7.71162	0.0129211	0.0369897	59	72	81	236	137	243	dapB	4-hydroxy-tetrahydrodipicolinate reductase [EC:1.17.1.8]
COO91_05697	0.549196	3.05249	8.29689	0.010389	0.030859	39	56	40	120	116	151	none	hypothetical protein
COO91_09313	0.548138	8.93707	7.68016	0.0153355	0.0424422	3279	3091	3083	7998	12017	6737	none	Transposase
COO91_03779	0.54777	8.75102	30.3876	3.81426e-05	0.000287104	2156	2358	1968	5906	6058	6591	apcE	phycobilisome core-membrane linker protein
COO91_03765	0.546545	3.8952	10.5881	0.00467511	0.0162347	77	89	71	255	159	271	none	2-polyprenyl-3-methyl-5-hydroxy-6-metoxy-1%2C4-benzoquinol methylase
COO91_02967	0.546151	4.0449	9.00449	0.00804604	0.02535	115	77	73	255	258	249	chpA	chemosensory pili system protein ChpA (sensor histidine kinase/response regulator)
COO91_06998	0.544037	3.25814	7.73087	0.0128274	0.0367507	44	59	40	146	119	144	none	Catechol 2%2C3-dioxygenase or other lactoylglutathione lyase family enzyme
COO91_04237	0.543602	8.56267	8.83098	0.00981737	0.0295998	2449	2283	2194	5546	8674	5328	-	putative transposase
COO91_11276	0.543373	5.02218	8.29844	0.010383	0.0308498	155	217	140	375	514	560	petN	PetN protein
COO91_03021	0.543093	7.22111	9.90779	0.00641497	0.0210029	824	805	784	2197	2903	1722	none	putative amidohydrolase
COO91_06065	0.542828	5.04008	10.9274	0.00418157	0.0148301	155	145	118	413	291	503	galE	UDP-glucose 4-epimerase [EC:5.1.3.2]
COO91_02383	0.542612	4.09395	7.67826	0.0130853	0.0373395	51	64	60	209	104	193	none	Triacylglycerol esterase/lipase EstA%2C alpha/beta hydrolase fold
COO91_10467	0.542548	5.17101	12.9074	0.00224615	0.00886662	204	185	204	507	607	579	none	ATP-dependent exoDNAse
COO91_06815	0.542428	4.5128	14.293	0.00149378	0.00634813	109	120	130	376	265	394	none	Transposase
COO91_06802	0.542008	4.48685	14.3954	0.00145058	0.00619677	88	101	80	305	216	250	msmX	multiple sugar transport system ATP-binding protein
COO91_07537	0.540997	3.84344	7.48189	0.014101	0.0396646	78	65	66	208	217	171	none	Membrane protein involved in the export of O-antigen and teichoic acid
COO91_09383	0.540853	8.92371	7.57598	0.0159082	0.0437475	3214	3030	3046	7804	11722	6638	none	Transposase
COO91_04282	0.540321	5.42545	15.4673	0.00107361	0.00482992	256	344	260	773	892	764	none	Large exoprotein involved in heme utilization or adhesion
COO91_09297	0.539803	4.47502	15.6027	0.00103438	0.00468651	95	111	96	316	247	301	none	Transposase
COO91_05471	0.539281	3.83179	9.22577	0.00744085	0.0237126	63	78	65	170	209	205	none	Transposase
COO91_05858	0.539153	4.13113	8.30708	0.0103502	0.0308029	102	78	85	283	247	229	-	putative membrane protein
COO91_08080	0.539108	4.75095	13.1125	0.00211171	0.00842194	121	141	121	323	379	385	none	NADH:ubiqui oxidoreductase subunit 5
COO91_00816	0.537838	3.46934	8.78442	0.00870368	0.0268554	79	79	73	192	217	249	none	hypothetical protein
COO91_10511	0.536337	7.19746	22.8835	0.000173006	0.0010244	781	801	759	2389	1727	2606	none	Thiamin-phosphate pyrophosphorylase
COO91_03975	0.53472	4.85884	12.9311	0.00223009	0.00881287	166	137	137	465	408	382	none	SAM-dependent methyltransferase%2C MidA family
COO91_06775	0.534465	5.48959	13.4124	0.00193122	0.00787031	177	251	206	580	675	527	none	Endonuclease%2C Uma2 family
COO91_03780	0.534423	6.35748	7.98252	0.0127359	0.036566	448	686	432	1605	1126	1719	apcA	allophycocyanin alpha subunit
COO91_03972	0.533796	4.626	16.8736	0.00073517	0.00349319	125	141	122	397	348	357	none	GAF domain-like
COO91_03603	0.533307	4.30228	6.90029	0.0176764	0.0475116	125	123	99	315	397	264	pcyA	3Z-phycocyanobilin:ferredoxin oxidoreductase
COO91_05462	0.53298	3.96453	12.1587	0.00282511	0.0106957	101	87	83	257	218	300	CYP38	Peptidyl-prolyl cis-trans isomerase (rotamase) - cyclophilin family
COO91_09186	0.531344	4.62861	10.7317	0.00445863	0.0156081	118	141	158	420	326	444	none	Prokaryotic membrane lipoprotein lipid attachment site profile
COO91_07894	0.530452	6.2967	12.7941	0.00232443	0.00911581	489	474	492	1070	1462	1583	none	hypothetical protein
COO91_08657	0.529902	3.50622	8.9257	0.00827482	0.0259235	42	47	50	137	110	149	none	Nitroreductase
COO91_08945	0.529414	6.77868	14.739	0.0013156	0.00572348	424	476	527	1707	1010	1368	none	hypothetical protein
COO91_09365	0.528674	6.68927	16.934	0.000723584	0.00345025	596	640	602	1636	1991	1535	none	Large exoprotein involved in heme utilization or adhesion
COO91_05652	0.527285	4.23623	11.9593	0.00300636	0.011252	102	103	113	322	258	325	none	Endonuclease%2C Uma2 family
COO91_03189	0.527247	6.52407	10.9605	0.00416261	0.0147676	570	572	513	1496	1915	1219	none	Permease of the drug/metabolite transporter
COO91_11019	0.527182	6.8015	9.03508	0.00795916	0.0251386	44	56	38	141	119	130	none	Ca2+-binding protein%2C RTX toxin-related
COO91_06988	0.526785	4.79519	9.43154	0.00692389	0.0223647	98	76	74	254	180	275	tgt	queuine tRNA-ribosyltransferase [EC:2.4.2.29]
COO91_01778	0.52402	6.58985	8.12153	0.0119069	0.0345893	371	399	374	918	1413	849	none	putative membrane protein YozV%2C TM2 domain
COO91_05817	0.523996	4.03657	9.71989	0.00626633	0.0206309	73	79	58	196	197	198	none	DNA-binding response regulator%2C OmpR family%2C containings REC and winged-helix
COO91_00477	0.523883	8.35643	21.2377	0.000250896	0.00141664	1544	1630	1524	4330	4741	4124	ABCB-BAC	ATP-binding cassette, subfamily B, bacterial
COO91_10027	0.523092	5.03264	7.57195	0.0136245	0.0385302	165	194	149	642	290	518	none	Transposase
COO91_00508	0.521506	5.06659	16.7562	0.00075828	0.00359511	123	150	134	393	382	368	degT	pleiotropic regulatory protein
COO91_03303	0.518108	5.03581	13.0493	0.00215218	0.00854555	190	154	207	507	499	552	aroC	chorismate synthase [EC:4.2.3.5]
COO91_01862	0.516885	3.47246	7.61462	0.0134051	0.0380132	76	64	65	197	199	180	none	hypothetical protein
COO91_04784	0.516395	4.74203	7.6817	0.0130682	0.0373121	105	115	142	305	406	298	none	hypothetical protein
COO91_02999	0.516061	5.40014	9.37317	0.00706629	0.0227568	227	289	244	651	878	573	none	Glycosyltransferase%2C GT2 family
COO91_09125	0.515953	4.91457	12.1836	0.00280331	0.0106355	205	188	196	557	577	518	parB	chromosome partitioning protein, ParB family
COO91_06035	0.515689	5.8985	13.063	0.00214335	0.0085136	195	215	226	690	420	695	ccdA	cytochrome c-type biogenesis protein
COO91_06458	0.514622	5.78909	9.75498	0.00619123	0.0204186	299	235	279	701	897	674	dndC	DNA sulfur modification protein DndC
COO91_09359	0.513928	4.52532	14.4355	0.00143407	0.00614019	101	116	95	320	255	301	none	Transposase
COO91_01630	0.513397	5.17006	13.4933	0.00188554	0.00770736	176	203	162	587	392	545	none	Armadillo-like helical
COO91_01248	0.513144	7.91602	12.6104	0.00245811	0.00957069	1437	1659	1576	3760	5328	3835	-	putative transposase
COO91_05024	0.511956	4.58139	14.5456	0.00138977	0.00598364	165	166	127	427	418	435	none	Endonuclease%2C Uma2 family
COO91_07220	0.510704	5.32197	14.0385	0.00160752	0.0067415	161	183	184	540	446	494	none	Tetratricopeptide
COO91_06426	0.510438	5.61525	14.5558	0.00138574	0.00597102	264	336	268	758	877	770	pucC	MFS transporter, BCD family, chlorophyll transporter
COO91_08717	0.510272	8.35961	17.9951	0.000550131	0.0027504	1171	1517	1107	4014	2691	3941	none	Multidrug efflux pump subunit AcrB
COO91_03676	0.508829	6.8654	24.5638	0.000120323	0.000753673	720	825	646	2124	1963	2015	smc	chromosome segregation protein
COO91_02946	0.508637	3.91911	6.85418	0.0180015	0.0482296	84	81	45	191	173	223	none	Tetratricopeptide
COO91_09851	0.506585	4.32488	10.1129	0.0054807	0.0185153	96	148	112	309	308	371	none	hypothetical protein
COO91_06530	0.506326	5.0762	6.97491	0.0172779	0.0466723	200	214	208	528	747	436	none	Regulator of sirC expression%2C containings transglutaminase-like and TPR domains
COO91_07684	0.506137	7.52545	19.4792	0.000380516	0.00200792	1030	995	926	3004	2134	3166	none	Thiamin-phosphate pyrophosphorylase
COO91_09267	0.504541	5.3186	17.0377	0.000704175	0.00336809	152	145	145	425	379	431	none	ATPase involved in DNA repair
COO91_08564	0.504532	7.52439	19.9789	0.000337319	0.00181288	1031	1000	924	2995	2157	3150	none	Thiamin-phosphate pyrophosphorylase
COO91_08834	0.504527	5.59466	16.7023	0.000769159	0.00363712	273	304	249	769	801	718	none	hypothetical protein
COO91_06105	0.504396	5.21127	12.1344	0.0028465	0.0107579	230	218	231	596	713	573	none	WD40 repeat
COO91_07243	0.504156	3.48091	8.57022	0.00940277	0.0285886	60	49	60	164	138	172	none	protein of unknown function DUF4365
COO91_09551	0.503975	4.1776	8.20491	0.0107468	0.0317997	58	76	69	203	145	220	none	DNA primase
COO91_05344	0.503797	5.55631	12.7521	0.00235431	0.00922632	313	284	252	774	868	711	none	Ubiqui/menaqui biosynthesis C-methylase UbiE
COO91_03818	0.503539	4.29827	11.7042	0.00325776	0.0120348	80	103	92	291	208	269	rsbU_P	phosphoserine phosphatase RsbU/P [EC:3.1.3.3]
COO91_07218	0.502545	4.47591	10.4449	0.00490276	0.0168897	110	114	115	298	290	357	argB	acetylglutamate kinase [EC:2.7.2.8]
COO91_06338	0.502181	5.05788	12.0954	0.00288125	0.0108626	162	129	139	369	414	414	ABC.MS.S	multiple sugar transport system substrate-binding protein
COO91_02387	0.501472	2.95825	7.39918	0.0145555	0.0406681	37	47	41	109	119	118	none	Putative Zn-dependent protease%2C containings TPR repeats
COO91_04157	0.501442	7.31376	26.9294	7.40213e-05	0.000501381	861	1037	944	2734	2496	2656	none	CheY chemotaxis protein or a CheY-like REC
COO91_02379	0.500593	6.24251	20.0274	0.000333433	0.00179646	485	417	428	1322	1086	1312	none	ABC-type bacteriocin/lantibiotic exporters%2C containing an N-terminal double-glycine peptidase domain
COO91_04202	-0.500631	5.46073	9.64091	0.00643914	0.0210511	326	305	322	437	521	356	HPD	4-hydroxyphenylpyruvate dioxygenase [EC:1.13.11.27]
COO91_06253	-0.501584	7.83063	15.8087	0.000977719	0.00447288	1131	1341	1256	2020	1213	1986	pixJ	methyl-accepting chemotaxis protein PixJ
COO91_03672	-0.501774	5.66383	7.94935	0.0119539	0.0346887	556	548	542	688	971	596	none	Tetratricopeptide
COO91_02189	-0.50187	5.80396	8.58117	0.00936551	0.0284994	268	431	272	464	307	577	rnc	ribonuclease III [EC:3.1.26.3]
COO91_07267	-0.502646	7.35566	15.3343	0.00111379	0.00497655	1015	924	1043	1468	1120	1586	nemA	N-ethylmaleimide reductase [EC:1.-.-.-]
COO91_05649	-0.502682	9.51931	9.10277	0.00829433	0.0259414	3198	4395	4195	6499	3326	6707	petB_2	cytochrome b6
COO91_03749	-0.503386	8.54096	14.9846	0.00122772	0.00539758	4071	5017	3754	6547	4722	6562	Flv3b	Diflavin flavoprotein Sll0550
COO91_07064	-0.504184	8.74388	26.6487	7.83001e-05	0.000524131	3563	4121	3261	5517	4504	5128	copB	Cu2+-exporting ATPase [EC:3.6.3.4]
COO91_02246	-0.504626	3.53071	9.18995	0.00753522	0.0239393	80	108	84	139	108	129	moxR	MoxR-like ATPase [EC:3.6.3.-]
COO91_05165	-0.50538	7.27751	9.77143	0.00642262	0.0210164	2141	1912	1930	2722	3212	2293	none	NADP-dependent 3-hydroxy acid dehydrogenase YdfG
COO91_10842	-0.505639	4.06692	10.9735	0.00411911	0.0146421	146	151	126	204	200	179	none	Cell division protein DamX%2C binds to the septal ring%2C containings C-terminal SPOR domain
COO91_06954	-0.506968	7.8894	12.133	0.00284776	0.0107589	797	922	991	1221	1415	1081	none	Ca2+-binding protein%2C RTX toxin-related
COO91_00337	-0.507076	3.5362	7.80482	0.0124746	0.0359397	100	110	81	124	118	160	trpF	phosphoribosylanthranilate isomerase [EC:5.3.1.24]
COO91_02773	-0.508544	8.2799	14.2586	0.00150863	0.00640117	2011	2387	2012	2360	2860	3594	none	hypothetical protein
COO91_07047	-0.509938	4.78645	9.89282	0.00590593	0.019701	132	187	160	241	153	270	none	hypothetical protein
COO91_02319	-0.510282	4.98508	8.16508	0.010906	0.0321741	227	294	222	380	211	442	none	Endonuclease%2C Uma2 family
COO91_08122	-0.51048	5.91304	10.857	0.00427895	0.0151209	155	236	163	275	226	259	none	ABC-type bacteriocin/lantibiotic exporters%2C containing an N-terminal double-glycine peptidase domain
COO91_04332	-0.511125	6.91833	12.1497	0.002833	0.0107181	702	912	747	1202	714	1364	nth	endonuclease III
COO91_04525	-0.511228	9.24203	10.6989	0.00464476	0.0161396	2708	2675	2837	3304	4657	3249	rps7	30S ribosomal protein S7
COO91_01608	-0.511235	7.86516	16.1778	0.00088471	0.00410463	1042	1091	1184	1648	1140	1830	ABC.CD.TX	HlyD family secretion protein
COO91_00344	-0.511604	9.14317	32.1582	2.76913e-05	0.000217196	3627	4452	3794	5729	4912	5699	ileS	isoleucyl-tRNA synthetase
COO91_06387	-0.511713	6.53261	8.64745	0.0095162	0.0288606	410	554	497	766	405	863	none	putative protein family UPF0367
COO91_05322	-0.512897	10.8613	18.1254	0.000532258	0.00267439	11131	16145	11742	20254	13751	19732	psbC	photosystem II CP43 chlorophyll apoprotein
COO91_05454	-0.513198	5.07479	11.059	0.00400613	0.0143016	239	267	302	413	269	441	murB	UDP-N-acetylmuramate dehydrogenase [EC:1.3.1.98]
COO91_00283	-0.513935	8.13123	19.8946	0.000344209	0.00184716	1716	2215	1756	2953	1941	2962	none	Alpha-amylase/alpha-mannosidase%2C GH57 family
COO91_06262	-0.514123	6.0597	22.3841	0.000193325	0.00112927	328	417	355	555	460	495	none	Secreted protein containing bacterial Ig-like domain and vWFA domain
COO91_02924	-0.5147	4.92895	15.1887	0.00115973	0.00515307	217	264	200	290	317	323	rimI	ribosomal-protein-alanine N-acetyltransferase [EC:2.3.1.128]
COO91_06040	-0.515145	9.11293	20.1324	0.000325174	0.00175808	3051	4378	3633	5132	5288	4632	none	Polyhydroxyalkanoate synthesis regulator phasin
COO91_03558	-0.515717	8.1779	26.2955	8.40829e-05	0.000553934	1712	2085	1952	2519	2600	2749	rps18	30S ribosomal protein S18
COO91_10565	-0.516172	4.80082	12.9469	0.00221952	0.00878393	179	225	194	310	206	309	none	hypothetical protein
COO91_07470	-0.516486	7.17708	26.3742	8.27541e-05	0.000546177	1089	1356	1001	1655	1415	1649	recF	DNA repair and genetic recombination protein
COO91_07271	-0.516557	7.32357	9.01026	0.00866096	0.0267617	983	865	1105	1125	1678	1222	trxA	thioredoxin 1
COO91_00330	-0.517018	5.69217	17.2021	0.00067458	0.00324951	598	612	498	872	745	725	rlpA	rare lipoprotein A
COO91_06031	-0.518186	8.51747	21.0321	0.000263137	0.00147422	1690	2308	2383	3167	2528	3068	none	putative ATP-dependent carboligase%2C ATP-grasp superfamily
COO91_04997	-0.518658	6.81471	24.7452	0.000115807	0.00073005	729	968	831	1187	1117	1145	none	Tetratricopeptide
COO91_02115	-0.518844	3.41293	8.30611	0.0103538	0.0308054	93	97	75	132	102	130	none	Ser/Thr protein kinase RdoA involved in Cpx stress response%2C MazF antagonist
COO91_01568	-0.519128	4.29581	9.49964	0.00676183	0.0219395	104	102	123	137	123	194	ABC-2.P	ABC-2 type transport system permease protein
COO91_03543	-0.520166	6.25707	14.1163	0.00157175	0.00662742	604	679	620	835	1008	737	none	RecB family nuclease
COO91_07591	-0.520652	6.97298	19.6184	0.000367894	0.00194914	624	941	796	1144	915	1168	cysE	serine O-acetyltransferase [EC:2.3.1.30]
COO91_06324	-0.520877	5.60913	9.00433	0.00804649	0.02535	203	316	240	397	224	423	none	Phosphoribosyl 1%2C2-cyclic phosphodiesterase
COO91_09517	-0.521291	5.24664	13.8868	0.00167998	0.00700708	307	304	251	394	383	401	none	Archaeal DNA helicase HerA or a related bacterial ATPase%2C containings HAS-barrel and ATPase domains
COO91_08764	-0.521629	3.29516	6.83681	0.0181256	0.0484425	78	118	66	122	97	138	none	Alcohol dehydrogenase superfamily%2C zinc-type
COO91_09757	-0.521944	7.2545	7.46175	0.0152786	0.0423249	273	153	180	275	274	286	none	DNA-binding transcriptional regulator%2C FadR family
COO91_10553	-0.522464	4.64609	13.1743	0.00207306	0.0083199	198	202	155	245	238	275	none	Archaeal DNA helicase HerA or a related bacterial ATPase%2C containings HAS-barrel and ATPase domains
COO91_04453	-0.522568	6.63404	7.27276	0.0169841	0.0460742	943	1161	825	1627	918	1485	psaE	photosystem I subunit IV
COO91_04555	-0.523271	4.65205	10.1093	0.00548724	0.0185258	143	201	146	214	217	234	none	Pimeloyl-ACP methyl ester carboxylesterase
COO91_04040	-0.524474	3.31393	7.1432	0.0160707	0.044119	49	72	61	79	72	97	none	putative aspartyl protease
COO91_07254	-0.525859	5.58126	9.56795	0.00660357	0.0214839	88	176	124	201	151	174	none	1-acyl-sn-glycerol-3-phosphate acyltransferase
COO91_06176	-0.526021	9.06591	28.6574	5.27996e-05	0.00037873	2508	2998	2566	3819	3422	3747	gatB	aspartyl-tRNA(Asn)/glutamyl-tRNA(Gln) amidotransferase subunit B [EC:6.3.5.6 6.3.5.7]
COO91_03552	-0.526077	7.88824	30.0234	4.08021e-05	0.000303952	1634	2013	1625	2633	2082	2474	none	hypothetical protein
COO91_09514	-0.527155	4.60121	7.814	0.0124316	0.0358445	216	174	186	271	313	197	none	hypothetical protein
COO91_00498	-0.527605	5.00837	14.4046	0.0014468	0.0061849	237	285	258	342	374	340	none	hypothetical protein
COO91_05333	-0.52843	4.06697	8.0448	0.0114034	0.0333285	138	126	138	161	226	156	none	hypothetical protein
COO91_05648	-0.528751	9.32741	10.1643	0.00579765	0.0193744	3072	4818	3474	6201	3324	6021	petD	cytochrome b6-f complex subunit 4
COO91_07480	-0.52902	4.9613	16.6418	0.000781573	0.00369099	251	255	288	393	309	385	none	hypothetical protein
COO91_05091	-0.531868	7.80996	14.8909	0.00126045	0.00552351	1350	1561	1453	1966	2171	1745	none	hypothetical protein
COO91_02389	-0.532274	7.37821	12.6985	0.00239299	0.00935082	891	794	1132	1311	1345	1177	sir	ferredoxin-sulfite reductase
COO91_04940	-0.532879	7.09185	20.7291	0.000282414	0.00156432	660	912	765	1126	831	1222	plsX	fatty acid/phospholipid synthesis protein
COO91_05466	-0.533408	7.34117	16.1297	0.000896262	0.00415286	803	903	904	1205	1335	974	none	Spore germination protein GerM
COO91_04573	-0.533418	8.60787	21.5085	0.000235739	0.00134793	2200	2818	2581	3717	2607	4044	rbpG	RNA-binding protein
COO91_05164	-0.534124	9.79589	9.53415	0.00739004	0.0236097	12706	10539	9868	14478	17413	12761	hglE	heterocyst glycolipid synthase
COO91_00368	-0.534971	5.1353	15.3845	0.00109843	0.00492541	286	326	335	452	461	364	none	hypothetical protein
COO91_03510	-0.536004	3.97831	9.3677	0.00707979	0.0227867	93	124	128	165	124	180	none	Signal transduction histidine kinase
COO91_03643	-0.536361	6.72623	12.8207	0.00230577	0.00905576	550	862	662	1130	659	1028	psbJ	photosystem II PsbJ protein
COO91_02493	-0.536474	5.68361	6.98549	0.0172191	0.0465471	92	99	92	158	80	149	none	Tellurite resistance protein
COO91_05850	-0.536532	5.94155	19.8238	0.000350112	0.00187234	593	615	497	776	786	737	pncB	nicotinate phosphoribosyltransferase [EC:6.3.4.21]
COO91_03179	-0.53693	6.25713	16.0412	0.000917937	0.00422978	609	684	647	873	967	767	none	hypothetical protein
COO91_03203	-0.537791	8.31879	21.2009	0.000253042	0.00142587	1741	1772	1911	2720	1996	2680	none	NADP-dependent 3-hydroxy acid dehydrogenase YdfG
COO91_03316	-0.538765	4.58613	13.8367	0.00170466	0.00708395	170	224	178	291	192	293	none	Tetratricopeptide
COO91_04941	-0.539277	6.82886	21.8251	0.000219303	0.00126464	626	779	569	994	702	977	fabH	3-oxoacyl-[acyl-carrier-protein] synthase III [EC:2.3.1.180]
COO91_03866	-0.539484	6.82628	26.0229	8.88722e-05	0.000580889	706	919	797	1210	918	1148	none	Serine/threonine protein kinase
COO91_05269	-0.539654	5.22187	15.5378	0.00105298	0.00475668	262	252	257	340	283	426	none	Endonuclease%2C Uma2 family
COO91_03650	-0.540908	7.65635	27.9253	6.08238e-05	0.000425295	1407	1506	1280	1969	1907	1763	ndhC	NADH dehydrogenase subunit 3
COO91_03820	-0.541425	6.19397	10.6111	0.00464149	0.0161334	364	360	388	497	547	451	none	Molecular chaperone GrpE
COO91_06358	-0.541791	8.63273	19.4763	0.000380788	0.00200792	1721	2326	2295	2953	2208	3437	rpl9	50S ribosomal protein L9
COO91_10999	-0.542319	4.11538	7.67629	0.013095	0.0373492	168	132	148	227	147	238	none	Membrane protease subunits
COO91_04448	-0.542845	3.70762	10.1526	0.00540771	0.0183145	85	108	88	111	124	142	moaB	molybdenum cofactor biosynthesis protein B
COO91_02452	-0.543588	4.84218	7.6867	0.0130469	0.0372619	198	263	191	361	165	361	gidB	16S rRNA (guanine527-N7)-methyltransferase [EC:2.1.1.170]
COO91_06538	-0.543699	4.17547	12.8262	0.00230198	0.00904414	129	138	121	161	158	204	none	hypothetical protein
COO91_04489	-0.544325	8.57183	33.1683	2.31911e-05	0.000186079	3591	4042	3262	5404	4250	5036	nrrA	nitrogen-responsive response regulator
COO91_05478	-0.544602	5.29474	12.5833	0.00247852	0.00964322	534	433	412	610	521	741	nifZ	iron-sulfur cofactor synthesis protein
COO91_01523	-0.544726	5.14795	19.8566	0.000347362	0.00186131	284	284	298	400	368	400	none	Transposase
COO91_03085	-0.54473	4.38288	8.07598	0.0112721	0.0329932	118	118	142	179	172	158	none	DNA-binding transcriptional regulator%2C AcrR family
COO91_04416	-0.544979	10.2687	12.0019	0.003072	0.011466	8994	9678	9036	12066	15225	9542	pspA	phage shock protein A
COO91_02361	-0.545977	9.00547	31.4271	3.15592e-05	0.000242439	3298	4446	3577	5457	4399	5350	asd	aspartate-semialdehyde dehydrogenase [EC:1.2.1.11]
COO91_10757	-0.546054	2.96854	7.77283	0.0126259	0.0362981	44	57	49	67	54	81	none	Site-specific DNA-cytosine methylase
COO91_02259	-0.547106	5.59191	19.5083	0.000377843	0.00199793	363	368	412	500	516	520	none	hypothetical protein
COO91_05899	-0.547223	3.34709	8.7973	0.00866358	0.0267622	60	80	78	121	76	97	none	putative nuclease of the RNAse H fold%2C HicB family
COO91_05606	-0.547332	4.77725	13.4936	0.00188537	0.00770736	329	360	293	476	396	448	none	putative metal-dependent enzyme of the double-stranded beta helix superfamily
COO91_10325	-0.548055	3.77583	8.95462	0.00818999	0.025725	110	143	84	170	122	160	none	hypothetical protein
COO91_11259	-0.548055	3.77583	8.95462	0.00818999	0.025725	110	143	84	170	122	160	none	hypothetical protein
COO91_00179	-0.549338	9.0258	35.7985	1.48618e-05	0.000126964	2579	2825	2620	3641	3150	4005	argZ	N-Dimethylarginine dimethylaminohydrolase
COO91_02790	-0.549594	7.51165	16.5491	0.000801046	0.00377143	1084	1395	1220	1749	1161	2089	rpl19	50S ribosomal protein L19
COO91_06039	-0.550003	7.19685	24.882	0.000112525	0.000712265	1027	1033	953	1332	1223	1496	none	hypothetical protein
COO91_03121	-0.550005	4.55771	8.35433	0.0101724	0.0303991	289	258	248	292	461	301	E1.14.13.81	magnesium-protoporphyrin IX monomethyl ester (oxidative) cyclase [EC:1.14.13.81]
COO91_04874	-0.551137	5.57847	14.8062	0.00129086	0.00562943	271	354	284	477	279	470	none	DNA-binding transcriptional regulator%2C AcrR family
COO91_05909	-0.551622	8.8396	17.7584	0.000584349	0.00289076	1994	3128	2816	4063	2728	3869	rpe	ribulose-phosphate 3-epimerase [EC:5.1.3.1]
COO91_00245	-0.553223	4.19975	10.7414	0.00444432	0.0155731	117	166	168	205	173	226	ABC.FEV.P	iron complex transport system permease protein
COO91_03635	-0.553332	9.00471	22.3607	0.000194337	0.00113396	3492	3675	3411	4647	5153	4268	rps6	30S ribosomal protein S6
COO91_06281	-0.55377	6.22471	27.2783	6.90637e-05	0.00047313	437	526	514	641	629	703	none	Endonuclease%2C Uma2 family
COO91_06347	-0.554354	8.13149	16.3373	0.000847628	0.00396145	1888	2223	1792	3164	1768	3035	none	2OG-Fe dioxygenase
COO91_03994	-0.555455	11.088	20.2787	0.000314057	0.0017065	12345	11609	11550	17026	12327	18568	rpoC1	RNA polymerase gamma subunit
COO91_04994	-0.555815	4.97524	15.7359	0.000997325	0.00454528	234	233	183	337	230	306	none	NADP-dependent 3-hydroxy acid dehydrogenase YdfG
COO91_05456	-0.555865	6.31968	26.3786	8.26793e-05	0.000546177	627	671	665	878	842	902	murC	UDP-N-acetylmuramate--alanine ligase [EC:6.3.2.8]
COO91_06705	-0.555959	5.35334	13.5196	0.00187091	0.00766139	264	240	250	312	266	438	none	hypothetical protein
COO91_03338	-0.556762	4.29535	10.296	0.00515308	0.0175897	123	219	147	222	194	232	none	cAMP-binding domain of CRP or a regulatory subunit of cAMP-dependent protein kinases
COO91_06371	-0.557885	9.37062	32.9592	2.40513e-05	0.000192268	4425	5751	4850	7283	5705	7062	none	putative unusual protein kinase regulating ubiqui biosynthesis%2C AarF/ABC1/UbiB family
COO91_07098	-0.557926	4.29276	16.5524	0.000800352	0.0037698	168	160	174	242	188	244	kdpA	K+-transporting ATPase ATPase A chain [EC:3.6.3.12]
COO91_06421	-0.559037	7.15141	12.1432	0.00292431	0.011002	635	819	732	1206	593	1148	chlG	chlorophyll synthase [EC:2.5.1.62]
COO91_03942	-0.559821	7.11831	28.8103	5.12776e-05	0.000369297	1207	1270	1164	1772	1589	1483	ABC.PE.P1	peptide/nickel transport system permease protein
COO91_06621	-0.560447	8.86792	26.9035	7.4405e-05	0.00050335	2270	2804	2434	2987	3360	3594	prfA	peptide chain release factor 1
COO91_05865	-0.560707	8.10758	18.5186	0.000482142	0.00245917	1171	1012	1172	1649	1300	1555	katE	catalase [EC:1.11.1.6]
COO91_08126	-0.561887	6.5924	11.5669	0.00340282	0.0124982	143	153	129	176	176	213	none	Signal transduction histidine kinase regulating C4-dicarboxylate transport system
COO91_00695	-0.562497	7.70254	35.3845	1.59155e-05	0.000135114	1354	1618	1558	2135	1886	1998	pps	pyruvate, water dikinase [EC:2.7.9.2]
[truncated: 1,594 more rows]

## Sheet: M2_3h_0h
GeneID	logFC	logCPM	F	PValue	FDR	M2_0h_1	M2_0h_2	M2_0h_3	M2_3h_1	M2_3h_2	M2_3h_3	Gene name	Gene description
COO91_08224	5.65855	-0.87168	17.6085	0.000779902	0.00489088	0	0	0	6	10	8	none	Glutathione S-transferase
COO91_00904	5.47348	-1.11101	14.0487	0.00194035	0.0101559	0	0	0	6	7	8	none	hypothetical protein
COO91_01252	5.46177	-0.787844	12.9005	0.00267325	0.0131293	0	0	0	3	12	6	none	Thiaminase
COO91_01818	5.31729	-1.28244	10.4809	0.00552812	0.0233736	0	0	0	2	13	4	none	hypothetical protein
COO91_06837	5.18746	-1.16023	10.4815	0.00552704	0.0233736	0	0	0	8	8	1	none	Geminivirus V2 protein
COO91_09853	5.18336	-0.135295	14.3411	0.00179232	0.00948657	0	0	0	7	6	4	none	hypothetical protein
COO91_10676	5.09639	-1.40535	10.5439	0.00636919	0.0261434	0	0	0	6	7	3	E3.6.3.8	Ca2+-transporting ATPase [EC:3.6.3.8]
COO91_09441	4.9929	-1.28177	8.86142	0.0107138	0.039552	0	0	0	2	3	10	none	Pyruvate/2-oxoglutarate dehydrogenase complex
COO91_08401	4.90935	-1.50509	10.6204	0.0062268	0.0257346	0	0	0	5	4	5	none	hypothetical protein
COO91_09735	4.80815	-0.758599	8.81185	0.00957306	0.0362811	0	0	0	5	1	7	none	hypothetical protein
COO91_00066	4.80657	-0.825182	7.77323	0.0137952	0.0484173	0	0	0	5	5	3	none	hypothetical protein
COO91_04166	4.79523	-1.16624	8.49545	0.010678	0.0394466	0	0	0	2	3	8	none	hypothetical protein
COO91_09032	4.69834	-1.46378	8.38399	0.0111015	0.0407332	0	0	0	5	2	5	none	hypothetical protein
COO91_07828	4.61909	-0.541145	28.1237	5.85213e-05	0.000593104	0	1	0	14	21	17	none	hypothetical protein
COO91_10787	4.29572	-1.50183	8.66931	0.0100538	0.0376677	0	0	0	3	4	2	none	hypothetical protein
COO91_00058	4.2857	-1.08518	7.87821	0.0132829	0.0470927	0	0	0	1	6	2	none	hypothetical protein
COO91_08350	4.13252	-1.39816	8.35947	0.0111973	0.041015	0	0	0	2	2	4	none	hypothetical protein
COO91_01446	3.94549	-0.356848	14.8475	0.00127595	0.00719692	0	1	0	15	10	7	pat	phosphinothricin acetyltransferase [EC:2.3.1.183]
COO91_08310	3.90257	-0.408079	16.9407	0.000722315	0.00458285	1	1	0	18	31	7	none	Methyl-accepting chemotaxis protein
COO91_10200	3.73132	-0.460926	12.2864	0.00271543	0.0132627	1	0	0	6	15	7	none	putative arabinose efflux permease%2C MFS family
COO91_11212	3.40677	1.36927	45.6973	3.34558e-06	5.80329e-05	1	2	2	17	36	40	none	hypothetical protein
COO91_00837	3.3259	-0.10284	12.1974	0.00279134	0.0135608	1	1	0	17	10	10	ABC.PE.P1	peptide/nickel transport system permease protein
COO91_10130	3.20994	0.38761	13.7526	0.00177618	0.00941958	3	0	0	12	23	15	none	hypothetical protein
COO91_00727	3.11554	-0.696981	7.761	0.0126823	0.0453938	0	0	1	6	6	6	none	Superfamily II DNA or RNA helicase%2C SNF2 family
COO91_09473	3.09846	-0.217815	15.3373	0.00111288	0.00648322	1	2	0	13	19	14	none	hypothetical protein
COO91_07387	3.0884	0.114699	16.7752	0.000754483	0.00475351	2	1	0	9	19	18	none	hypothetical protein
COO91_08180	3.05035	2.88534	159.848	4.54483e-10	6.5591e-08	23	21	18	209	282	365	none	Tetratricopeptide
COO91_08353	2.96038	-0.599655	8.85445	0.00848804	0.0328828	0	1	0	7	5	4	none	IS4 transposase
COO91_08093	2.95899	-0.274319	13.4486	0.0019106	0.0100244	2	0	0	7	8	14	none	hypothetical protein
COO91_09217	2.95182	-0.0585843	9.91329	0.00586484	0.0245343	1	1	0	4	11	14	none	Cellulose biosynthesis protein BcsQ
COO91_02070	2.93987	-1.11342	7.65857	0.0131832	0.046893	0	0	1	3	8	5	none	hypothetical protein
COO91_01467	2.90339	-0.357468	9.6806	0.00635163	0.0261109	0	0	2	7	15	6	none	hypothetical protein
COO91_04995	2.85578	0.270928	10.5496	0.00473503	0.0206745	2	1	0	9	22	8	none	hypothetical protein
COO91_08181	2.73349	-0.243679	22.2035	0.000278547	0.00216906	2	3	1	14	29	26	none	hypothetical protein
COO91_08279	2.73151	0.11698	16.4936	0.000812969	0.00506014	0	4	2	14	39	16	none	hypothetical protein
COO91_10901	2.66724	0.0400616	13.1977	0.00205857	0.0106612	1	2	0	9	11	14	none	hypothetical protein
COO91_06230	2.64565	-0.654724	7.46458	0.0141948	0.0496268	0	2	0	9	6	8	none	hypothetical protein
COO91_04609	2.6453	-0.483925	7.99953	0.0115972	0.0421237	0	2	0	9	6	8	none	hypothetical protein
COO91_07544	2.63288	-0.110469	8.91076	0.00839734	0.0326365	4	0	0	19	14	10	none	hypothetical protein
COO91_04200	2.62025	4.45355	244.293	1.625e-11	7.03559e-09	46	44	48	388	559	463	none	ABC-type bacteriocin/lantibiotic exporters%2C containing an N-terminal double-glycine peptidase domain
COO91_07779	2.61956	0.780354	27.4507	6.67516e-05	0.000662254	1	4	2	26	22	25	none	hypothetical protein
COO91_10928	2.6039	4.90921	121.075	3.77097e-09	2.97155e-07	21	25	32	213	310	267	galE	UDP-glucose 4-epimerase [EC:5.1.3.2]
COO91_04199	2.5888	6.72844	452.594	1.10204e-13	1.70407e-10	243	272	244	2085	2975	2504	none	hypothetical protein
COO91_07745	2.54866	-0.311314	9.6187	0.00648869	0.0265441	1	2	0	13	11	7	none	Superfamily II DNA or RNA helicase%2C SNF2 family
COO91_07718	2.54312	-0.0222535	18.1333	0.00053119	0.0035868	1	1	2	10	15	16	none	Endonuclease YncB%2C thermonuclease family
COO91_08110	2.52774	0.196338	15.0999	0.00118878	0.00679917	3	2	1	22	22	15	none	hypothetical protein
COO91_07342	2.48676	-0.272357	10.1186	0.00547013	0.0231827	2	0	2	16	10	13	none	Helix-turn-helix domain
COO91_10930	2.47292	1.3218	13.7743	0.00173604	0.00925867	0	3	1	7	13	19	none	hypothetical protein
COO91_10895	2.45502	4.46267	210.368	5.32036e-11	1.29245e-08	35	39	30	252	384	310	none	cAMP-binding domain of CRP or a regulatory subunit of cAMP-dependent protein kinases
COO91_10252	2.43584	-0.142483	8.61167	0.00926268	0.0352456	0	0	4	12	14	12	rsbW	serine/threonine-protein kinase RsbW [EC:2.7.11.1]
COO91_08677	2.41843	0.394284	16.8572	0.000738336	0.00466808	1	4	0	14	17	15	none	hypothetical protein
COO91_10275	2.41386	7.75719	411.997	2.37938e-13	2.57545e-10	347	298	309	2395	3111	2919	none	Serine/threonine protein kinase
COO91_01801	2.40719	4.69596	179.866	1.81898e-10	3.57975e-08	69	84	50	480	700	598	ABCB-BAC	ATP-binding cassette, subfamily B, bacterial
COO91_02638	2.40471	0.171827	9.94044	0.00581084	0.0243313	3	1	0	11	18	8	none	P pilus assembly protein%2C chaperone PapD
COO91_08512	2.39232	-0.806505	9.32159	0.00805723	0.0316213	1	2	0	8	14	6	none	Serine/threonine protein kinase
COO91_00883	2.37427	0.838625	17.3471	0.000665386	0.00428444	4	6	3	34	44	35	none	IS4 transposase
COO91_01167	2.35224	0.193916	17.5038	0.000623857	0.00407521	2	2	2	10	26	17	none	hypothetical protein
COO91_09433	2.34083	0.117071	10.515	0.00478985	0.0208465	4	1	1	30	13	8	pat	phosphinothricin acetyltransferase [EC:2.3.1.183]
COO91_10380	2.33088	3.38501	112.876	6.36809e-09	4.50511e-07	20	21	15	122	162	184	none	hypothetical protein
COO91_10280	2.28202	8.63534	211.58	5.66552e-11	1.33312e-08	619	622	677	4070	6688	4779	ycaO	ribosomal protein S12 methylthiotransferase accessory factor
COO91_02163	2.27899	3.70443	89.1485	3.58842e-08	1.68416e-06	20	34	26	160	277	209	none	hypothetical protein
COO91_10276	2.27455	5.21355	151.841	6.75188e-10	8.70028e-08	67	43	55	354	539	436	none	DNA-binding response regulator%2C OmpR family%2C containings REC and winged-helix
COO91_02619	2.25277	5.43343	211.574	5.08565e-11	1.29245e-08	161	190	161	1038	1640	1372	DPM1	dolichol-phosphate mannosyltransferase [EC:2.4.1.83]
COO91_10282	2.23314	9.17818	229.474	2.67339e-11	8.26764e-09	845	818	780	5233	7242	6564	none	putative ATPase%2C archaeal AAA+ ATPase superfamily
COO91_07934	2.21385	-0.0637259	19.5682	0.000372393	0.00268898	2	3	2	20	18	17	none	2'-5' RNA ligase
COO91_09429	2.20183	5.75074	211.916	5.02118e-11	1.29245e-08	70	67	51	408	536	485	copB	Cu2+-exporting ATPase [EC:3.6.3.4]
COO91_02272	2.18193	4.6707	170.034	2.81713e-10	4.76447e-08	112	90	97	629	843	779	none	PEP-CTERM protein-sorting domain
COO91_05524	2.1564	0.569098	14.0507	0.00160189	0.00863916	4	1	3	13	23	25	none	hypothetical protein
COO91_02528	2.15218	0.653974	22.1212	0.000205086	0.0016881	6	2	5	22	49	27	none	Cytochrome c peroxidase
COO91_03835	2.14211	1.52695	36.6918	1.28438e-05	0.000177632	4	6	9	46	50	44	none	hypothetical protein
COO91_01763	2.13649	5.56547	198.637	8.36043e-11	1.8468e-08	111	137	90	636	993	829	E3.5.1.28B	N-acetylmuramoyl-L-alanine amidase [EC:3.5.1.28]
COO91_00650	2.12406	0.754157	15.8935	0.000955424	0.00575808	6	3	1	14	24	36	none	DNA-binding response regulator%2C OmpR family%2C containings REC and winged-helix
COO91_10128	2.0984	6.05549	234.738	2.23255e-11	7.7952e-09	102	107	75	582	669	753	none	Formylglycine-generating enzyme%2C required for sulfatase activity%2C containings SUMF1/FGE domain
COO91_06229	2.09504	3.83609	102.991	1.25453e-08	7.30054e-07	45	33	23	211	234	267	none	Nucleotide-binding universal stress protein%2C UspA family
COO91_03777	2.0937	-0.343057	8.49848	0.00965093	0.0364995	1	2	1	4	12	14	none	hypothetical protein
COO91_10278	2.09074	8.86418	233.195	2.35268e-11	7.7957e-09	785	666	685	4428	5479	5149	none	putative metal-dependent hydrolase%2C TIM-barrel fold
COO91_00801	2.08649	1.32597	21.4815	0.0002372	0.00190889	12	4	7	42	87	35	none	5-methylcytosine-specific restriction endonuclease McrA
COO91_07969	2.08398	0.0394445	8.3629	0.0101405	0.0379252	0	1	4	6	14	17	none	hypothetical protein
COO91_01168	2.05286	0.187983	13.6284	0.00181193	0.00957633	4	3	1	19	20	17	none	hypothetical protein
COO91_11148	2.04599	1.89624	28.3282	5.62512e-05	0.000579777	6	10	5	56	44	43	parA	chromosome partitioning protein
COO91_01203	2.04292	-0.345394	7.66104	0.0131709	0.0468646	1	2	2	3	14	19	none	hypothetical protein
COO91_06761	2.02349	1.16687	27.8194	6.20935e-05	0.000622015	3	8	4	29	40	33	none	hypothetical protein
COO91_08544	2.02282	2.75485	51.1109	1.63454e-06	3.31316e-05	14	6	11	51	77	83	ABC-2.TX	HlyD family secretion protein
COO91_09614	2.01686	0.533912	21.2591	0.000249658	0.00198552	3	4	4	22	30	23	none	hypothetical protein
COO91_09274	2.01045	-0.112936	8.37933	0.0100797	0.0377256	1	1	2	10	10	8	none	hypothetical protein
COO91_01804	2.0027	2.17819	34.1624	1.95467e-05	0.000248617	11	17	17	85	128	87	none	hypothetical protein
COO91_08540	1.9906	1.44605	36.2039	1.39052e-05	0.000188608	17	13	6	67	81	89	none	PEP-CTERM protein-sorting domain
COO91_03776	1.98484	-0.5815	7.44186	0.0143189	0.0499156	2	1	0	6	8	7	none	hypothetical protein
COO91_07396	1.97005	3.12581	49.8694	1.91619e-06	3.78482e-05	48	30	17	204	232	175	none	hypothetical protein
COO91_09276	1.96041	0.363492	10.0733	0.00555446	0.02343	3	0	3	13	18	9	none	hypothetical protein
COO91_10446	1.95382	2.84873	56.0482	8.9326e-07	2.09278e-05	11	27	16	108	128	109	none	DNA-binding response regulator%2C NarL/FixJ family%2C containings REC and HTH domains
COO91_03844	1.92384	1.11097	9.15769	0.00837588	0.0325766	5	6	3	25	40	24	none	hypothetical protein
COO91_08545	1.92019	1.18054	28.0739	5.90908e-05	0.000597756	4	8	5	25	46	37	none	hypothetical protein
COO91_09271	1.91197	2.37397	35.0326	1.68772e-05	0.000220361	18	10	14	92	67	102	none	putative transposase YbfD/YdcC associated with H repeats
COO91_02474	1.91035	9.01231	60.5	4.67756e-06	7.59069e-05	1378	1429	1032	6151	10282	7444	psbA_3	photosystem II P680 reaction center D1 protein
COO91_01099	1.90942	3.8432	44.2733	4.08202e-06	6.80798e-05	16	14	11	78	82	95	none	hypothetical protein
COO91_10279	1.90357	7.43888	174.548	2.29801e-10	4.14561e-08	351	243	279	1568	2039	1808	none	NTF2-like domain
COO91_01189	1.90061	1.56588	14.2251	0.0015404	0.00837068	8	6	2	24	26	50	metQ	D-methionine transport system substrate-binding protein
COO91_02025	1.89975	1.04026	15.4387	0.00108211	0.00633805	3	5	5	16	24	42	none	hypothetical protein
COO91_08285	1.89124	2.18132	21.5349	0.000325291	0.00243165	7	40	16	107	154	124	none	Nucleoid-associated protein YgaU%2C containings BON and LysM domains
COO91_07545	1.88118	0.934575	9.38456	0.00784447	0.0310452	7	6	5	20	60	32	none	Glycosyltransferase involved in cell wall bisynthesis
COO91_07210	1.86666	5.18171	122.615	3.42958e-09	2.79111e-07	101	180	127	746	907	794	none	hypothetical protein
COO91_05027	1.85804	0.280499	10.7623	0.00441388	0.0195243	3	4	2	16	16	23	none	Type I site-specific restriction endonuclease%2C part of a restriction-modification system
COO91_01376	1.85679	3.19788	57.4364	7.5936e-07	1.86872e-05	62	41	54	242	332	374	none	Protein of unknown function DUF3102
COO91_09476	1.85501	4.94743	13.1326	0.00468699	0.0205061	94	89	76	389	516	650	none	Transposase
COO91_11152	1.8477	0.577609	11.9671	0.00299903	0.0143445	3	1	1	8	11	12	none	putative transposase YbfD/YdcC associated with H repeats
COO91_03413	1.84435	0.1974	11.1981	0.00382971	0.0173734	1	2	4	10	14	19	none	hypothetical protein
COO91_10129	1.83964	1.60046	19.6606	0.000364158	0.00264896	6	9	3	34	39	34	none	protein of unknown function nitrogen fixation
COO91_06901	1.82782	0.118018	11.22	0.00380265	0.0173015	1	5	1	13	11	18	none	XisI protein
COO91_01220	1.82599	0.511084	7.87445	0.0121525	0.0438755	6	3	0	11	11	32	none	Non-ribosomal peptide synthetase component F
COO91_04477	1.8204	2.36533	40.24	7.36663e-06	0.000110745	11	23	11	63	103	98	-	putative membrane protein
COO91_09777	1.81814	0.9677	20.0587	0.000330947	0.00246401	4	6	2	19	28	24	none	hypothetical protein
COO91_01848	1.81787	2.44658	43.2562	4.71911e-06	7.63523e-05	18	12	14	72	91	95	parD1_3_4	antitoxin ParD1/3/4
COO91_10444	1.81714	1.31676	23.4506	0.000152778	0.00132505	8	4	6	31	28	47	none	AAA+-type ATPase%2C SpoVK/Ycf46/Vps4 family
COO91_00162	1.81376	3.85982	63.1796	4.00164e-07	1.13274e-05	46	55	54	240	325	340	none	Cellulose biosynthesis protein BcsQ
COO91_02642	1.8065	1.02666	20.8971	0.000271537	0.00212671	8	2	8	38	37	30	none	Periplasmic component of the Tol biopolymer transport system
COO91_07251	1.80404	0.975317	15.7233	0.00100077	0.00596822	9	2	3	24	36	22	none	Calycin-like
COO91_08329	1.80115	0.577385	10.0044	0.00568585	0.0239004	4	3	2	14	16	23	none	DNA-directed RNA polymerase%2C sigma subunit
COO91_07542	1.80001	2.24474	31.2489	3.25913e-05	0.000375685	24	9	13	88	86	91	none	Nucleotide-diphospho-sugar transferases
COO91_01914	1.79714	1.15314	20.9134	0.000270502	0.00212168	8	6	5	33	31	46	none	putative SPBc2 prophage-derived protein YoqJ
COO91_01799	1.79587	4.35277	116.099	5.16293e-09	3.75057e-07	82	104	71	374	612	492	none	hypothetical protein
COO91_02909	1.79415	0.865087	17.4166	0.000638054	0.00415042	5	3	5	19	28	29	none	hypothetical protein
COO91_09475	1.78966	3.54766	66.3861	2.85499e-07	8.57133e-06	47	45	36	182	274	279	none	Site-specific DNA-cytosine methylase
COO91_07385	1.78831	5.26033	40.5187	2.20739e-05	0.000274945	77	63	68	354	430	405	none	hypothetical protein
COO91_10972	1.78567	3.47715	57.2996	7.71505e-07	1.88932e-05	18	27	20	99	163	110	none	Membrane protein involved in the export of O-antigen and teichoic acid
COO91_05956	1.78205	0.0721957	9.91265	0.00586611	0.0245343	1	7	3	11	21	32	none	hypothetical protein
COO91_01764	1.78156	6.23152	225.775	3.04136e-11	8.98599e-09	231	266	211	1094	1570	1362	none	Flagellum-specific peptidoglycan hydrolase FlgJ
COO91_07248	1.77781	2.90603	50.4744	1.77269e-06	3.54014e-05	24	29	16	108	135	148	dcd	dCTP deaminase [EC:3.5.4.13]
COO91_10971	1.77187	3.71369	36.7671	1.33236e-05	0.000182295	25	26	13	94	141	127	none	Polysaccharide pyruvyl transferase family protein WcaK
COO91_10272	1.75885	4.62561	31.4972	7.75946e-05	0.000754506	51	48	50	272	241	318	none	hypothetical protein
COO91_10844	1.75602	1.39858	18.6821	0.000462878	0.00320755	10	6	4	29	57	27	none	Prokaryotic membrane lipoprotein lipid attachment site profile
COO91_07541	1.74433	3.21782	46.5664	2.96976e-06	5.33078e-05	30	27	34	128	234	147	none	Glycosyltransferase involved in cell wall bisynthesis
COO91_01761	1.74188	6.89006	90.8497	7.19803e-08	2.84349e-06	421	442	316	1700	2647	2174	none	hypothetical protein
COO91_05925	1.73664	2.85167	14.0199	0.00189574	0.00995126	7	6	11	22	59	54	none	hypothetical protein
COO91_07198	1.73416	1.30049	21.6351	0.000229006	0.00185397	6	7	12	41	57	41	none	hypothetical protein
COO91_10927	1.73288	4.9478	69.9504	1.99152e-07	6.30298e-06	50	54	48	230	300	307	none	Lysophospholipase L1 or related esterase
COO91_10863	1.72788	4.2619	106.367	9.89097e-09	6.11771e-07	76	70	50	336	336	395	none	DNA-binding response regulator%2C NarL/FixJ family%2C containings REC and HTH domains
COO91_04592	1.70921	5.19093	111.524	6.96511e-09	4.74153e-07	94	88	80	371	568	483	none	hypothetical protein
COO91_09861	1.70786	5.4253	51.0994	5.55862e-06	8.72571e-05	297	285	220	1071	1385	1885	none	Lysophospholipase L1 or related esterase
COO91_10152	1.70653	1.00923	12.5388	0.00251252	0.0125383	9	8	7	42	46	42	none	hypothetical protein
COO91_01803	1.70032	2.22361	23.6246	0.000147115	0.00128209	16	14	18	70	105	85	none	Parvulin-like peptidyl-prolyl isomerase
COO91_02436	1.69055	5.60777	32.641	9.30542e-05	0.000877368	164	129	121	647	850	712	none	Membrane protein involved in the export of O-antigen and teichoic acid
COO91_06486	1.68196	0.535001	11.239	0.00377953	0.0172324	5	7	2	21	28	26	none	hypothetical protein
COO91_00436	1.67727	0.48919	8.4228	0.00992081	0.0373376	5	2	4	20	15	24	none	hypothetical protein
COO91_01100	1.67339	3.85665	54.4163	1.08556e-06	2.44795e-05	30	19	26	101	171	127	ABC.SN.S	NitT/TauT family transport system substrate-binding protein
COO91_10448	1.66288	1.68613	20.1032	0.000327453	0.00244557	12	9	7	47	61	39	none	Chromosome partitioning ATPase%2C Mrp family%2C containings Fe-S cluster
COO91_02434	1.66119	5.3129	100.283	1.52558e-08	8.46814e-07	135	110	107	476	747	627	none	O-antigen ligase
COO91_07824	1.65546	7.00807	157.444	5.10851e-10	7.05773e-08	930	810	932	3614	4709	5697	none	Ca2+-binding protein%2C RTX toxin-related
COO91_01018	1.65431	0.090278	7.57455	0.013611	0.0480043	3	4	4	20	23	15	none	hypothetical protein
COO91_06731	1.65303	3.90429	36.0343	2.18531e-05	0.000272509	56	70	62	256	348	377	none	Sugar transferase involved in LPS biosynthesis
COO91_06413	1.65298	3.32977	52.7613	1.32915e-06	2.88482e-05	24	25	36	135	177	132	none	Glycerophosphoryl diester phosphodiesterase
COO91_04265	1.65112	2.52356	42.7428	5.08241e-06	8.08999e-05	24	20	17	78	135	106	none	hypothetical protein
COO91_01934	1.64964	2.17976	24.2737	0.000127967	0.00113627	14	5	20	67	82	55	none	putative ATPase%2C archaeal AAA+ ATPase superfamily
COO91_05258	1.64655	6.31801	171.398	2.64763e-10	4.54888e-08	595	478	437	2193	2855	2773	none	Glucose/arabinose dehydrogenase%2C beta-propeller fold
COO91_11176	1.64594	4.70256	69.9834	1.98503e-07	6.30087e-06	52	56	54	284	281	269	none	ATPase involved in DNA repair
COO91_11087	1.64015	1.993	27.9802	6.01765e-05	0.000607725	8	6	8	26	42	47	none	5-methylcytosine-specific restriction endonuclease McrA
COO91_07384	1.63983	6.61417	101.53	1.39338e-08	7.97895e-07	243	201	205	1017	1184	1140	lrtA	light-repressed protein
COO91_06532	1.6382	4.31795	57.1996	7.81878e-07	1.90181e-05	97	112	93	393	662	506	none	Secreted protein containing bacterial Ig-like domain and vWFA domain
COO91_09412	1.63708	2.29562	23.2331	0.000160204	0.00137732	16	5	22	73	90	60	none	putative ATPase%2C archaeal AAA+ ATPase superfamily
COO91_09629	1.63665	2.55214	16.0614	0.00106869	0.00627647	10	17	14	74	55	81	none	Transposase
COO91_01530	1.63596	5.51808	105.826	1.0271e-08	6.28095e-07	238	244	213	931	1396	1256	none	peptidase domain protein
COO91_08787	1.63412	-0.183861	8.69605	0.00898472	0.0343281	1	5	3	14	13	20	none	Protein-tyrosine phosphatase
COO91_10447	1.63406	1.29945	13.5884	0.00183335	0.0096801	4	10	6	33	32	38	none	hypothetical protein
COO91_05357	1.63405	2.31254	27.9092	6.10148e-05	0.000613777	24	18	27	106	136	114	none	Putative silver efflux pump
COO91_08309	1.63111	4.32416	12.2273	0.0053072	0.0226697	59	187	72	526	662	414	none	AAA+-type ATPase%2C SpoVK/Ycf46/Vps4 family
COO91_00185	1.63029	1.59993	19.0904	0.000418441	0.00295833	5	16	4	37	47	44	none	PEP-CTERM protein-sorting domain
COO91_01931	1.62756	2.17632	17.1156	0.000691159	0.00442146	17	4	12	38	47	86	none	hypothetical protein
COO91_00651	1.62508	1.0895	16.5874	0.000792938	0.00496113	5	11	2	28	32	32	none	Chemotaxis signal transduction protein
COO91_08752	1.62344	1.67346	31.4666	3.13352e-05	0.00036431	10	10	13	42	64	64	none	hypothetical protein
COO91_09686	1.62215	3.76021	62.3425	4.38026e-07	1.20674e-05	36	42	34	165	211	194	none	IS4 transposase
COO91_02057	1.61543	1.96844	18.8446	0.000444589	0.00309867	13	6	8	37	47	54	none	hypothetical protein
COO91_08765	1.6152	1.04153	17.0726	0.000697768	0.0044611	8	7	2	21	31	35	none	Protein N-acetyltransferase%2C RimJ/RimL family
COO91_02437	1.60934	7.58999	128.843	2.36091e-09	2.24162e-07	677	701	649	2784	3786	3680	none	Sugar transferase involved in LPS biosynthesis
COO91_11160	1.60773	1.01753	10.7548	0.00442489	0.0195559	4	7	6	21	50	16	none	hypothetical protein
COO91_01039	1.60267	1.85597	20.8285	0.00027592	0.00215481	8	5	9	28	46	38	none	hypothetical protein
COO91_00831	1.60078	0.522823	13.2665	0.00201677	0.0104849	3	4	3	15	18	18	none	Spore coat polysaccharide biosynthesis protein SpsF%2C cytidylyltransferase family
COO91_10277	1.60038	9.84667	147.38	8.48792e-10	1.0096e-07	1972	1856	1852	7993	10523	10031	none	Serine/threonine protein kinase
COO91_07115	1.59863	4.84047	110.835	7.29349e-09	4.9034e-07	68	74	57	266	399	333	PTS-Fru-EIIA	PTS system, fructose-specific IIA component [EC:2.7.1.202]
COO91_00936	1.59643	0.69961	11.1273	0.00391838	0.017731	2	7	8	14	43	30	ABC.PE.P	peptide/nickel transport system permease protein
COO91_10488	1.59562	1.20989	18.0368	0.000544331	0.0036618	4	9	5	22	41	28	none	DNA primase
COO91_11049	1.59562	1.20989	18.0368	0.000544331	0.0036618	4	9	5	22	41	28	none	DNA primase
COO91_10371	1.59265	6.82367	123.945	3.16224e-09	2.59304e-07	878	735	804	3069	4003	5064	none	Ca2+-binding protein%2C RTX toxin-related
COO91_11019	1.58911	6.8015	132.248	1.93808e-09	1.9349e-07	868	727	790	3024	3937	4983	none	Ca2+-binding protein%2C RTX toxin-related
COO91_10230	1.58881	3.71889	60.8655	5.15012e-07	1.35632e-05	36	42	34	161	207	189	none	IS4 transposase
COO91_08182	1.58325	2.1715	28.3475	5.60412e-05	0.000578808	16	13	28	83	98	104	none	Curved DNA-binding protein CbpA%2C containings a DnaJ-like domain
COO91_11164	1.57988	1.79659	23.7919	0.000141888	0.00124155	9	15	8	40	58	61	none	hypothetical protein
COO91_00161	1.57377	3.5668	50.062	1.86915e-06	3.71224e-05	39	46	45	192	224	224	none	Chromosome segregation protein Spo0J%2C containings ParB-like nuclease domain
COO91_06965	1.57257	5.89646	83.9654	5.51423e-08	2.36849e-06	155	198	135	650	848	897	none	hypothetical protein
COO91_09331	1.57024	0.13514	8.89186	0.00837532	0.0325766	3	3	2	14	18	8	none	hypothetical protein
COO91_09430	1.56999	5.24315	28.326	0.000133538	0.00118089	58	55	54	220	321	282	none	hypothetical protein
COO91_10233	1.56926	3.67485	30.9026	5.3598e-05	0.000559254	99	64	82	248	486	486	none	hypothetical protein
COO91_03547	1.56808	3.9918	80.244	7.61254e-08	2.97466e-06	44	43	50	169	258	250	none	hypothetical protein
COO91_08465	1.56687	1.806	9.01852	0.00889115	0.0340544	8	9	8	38	41	44	none	hypothetical protein
COO91_05562	1.56393	0.262053	11.5828	0.00338562	0.0158025	3	3	4	12	20	18	none	hypothetical protein
COO91_09974	1.56053	1.38897	10.9727	0.0041202	0.0184285	7	10	4	40	36	26	none	hypothetical protein
COO91_10356	1.5599	4.20384	40.6019	1.02725e-05	0.000146395	142	109	123	494	562	775	none	hypothetical protein
COO91_01895	1.5572	0.687551	10.9234	0.00418701	0.018681	3	8	2	16	25	23	none	IS4 transposase
COO91_04851	1.55668	1.3774	22.7642	0.00017763	0.00150091	8	9	7	38	34	45	none	putative epimerase YddE/YHI9%2C PhzF superfamily
COO91_00817	1.55275	2.3677	22.214	0.000200845	0.0016615	15	17	6	66	70	47	none	Superfamily II DNA or RNA helicase
COO91_08453	1.55061	0.531795	10.6143	0.00463463	0.0203183	8	3	1	15	22	22	none	Arc-type ribbon-helix-helix
COO91_01038	1.55036	2.30377	21.3408	0.000244998	0.00195277	13	16	5	44	72	49	none	hypothetical protein
COO91_09622	1.54663	9.79336	98.4337	1.96495e-08	1.028e-06	1797	1857	1561	7373	9258	8501	none	Large exoprotein involved in heme utilization or adhesion
COO91_10798	1.54573	0.741431	10.7167	0.00448073	0.0197646	6	6	2	23	31	14	dinD	DNA-damage-inducible protein D
COO91_05220	1.54523	1.38584	17.6274	0.000604315	0.00398362	11	5	10	34	58	35	modA	molybdate transport system substrate-binding protein
COO91_11173	1.54463	1.39935	12.4591	0.00257471	0.0127662	10	8	3	28	51	23	none	Site-specific recombinase XerD
COO91_03081	1.53889	2.64991	35.577	1.54156e-05	0.000205053	21	12	21	77	96	88	none	hypothetical protein
COO91_00709	1.53874	5.74537	58.6183	7.8414e-07	1.90303e-05	93	77	69	310	461	380	none	Glycosyltransferase involved in cell wall bisynthesis
COO91_07664	1.53626	3.17878	52.1148	1.44045e-06	3.03352e-05	30	40	28	154	147	166	none	Non-ribosomal peptide synthetase component F
COO91_06740	1.53356	0.8104	9.81388	0.00606746	0.0252108	2	4	9	20	22	31	none	putative restriction /modification enzyme
COO91_08385	1.5296	0.754775	8.20849	0.0107326	0.0395942	4	7	6	23	31	28	none	hypothetical protein
COO91_03466	1.52803	1.63313	12.4464	0.00258474	0.0128101	8	5	5	20	31	36	none	hypothetical protein
COO91_09621	1.52621	9.4018	118.462	4.44088e-09	3.33806e-07	1274	1213	1064	5005	6096	5774	none	Tetratricopeptide
COO91_01069	1.5184	1.40192	16.49	0.000813765	0.00506218	7	7	7	21	45	35	none	hypothetical protein
COO91_07535	1.518	4.52233	47.9559	2.7498e-06	5.00232e-05	128	109	103	492	583	532	none	Chromosome partitioning ATPase%2C Mrp family%2C containings Fe-S cluster
COO91_03708	1.51707	7.1202	111.679	6.89365e-09	4.72259e-07	528	492	510	2083	2723	2450	none	Membrane protein involved in the export of O-antigen and teichoic acid
COO91_09187	1.51635	4.31992	77.3185	9.89668e-08	3.59469e-06	56	88	60	309	339	310	none	hypothetical protein
COO91_08471	1.5135	3.28417	27.0068	7.28889e-05	0.000717879	12	34	26	108	125	106	none	hypothetical protein
COO91_10281	1.50779	8.92371	62.8613	1.35226e-06	2.91126e-05	1176	1323	1174	4324	7511	5531	none	hypothetical protein
COO91_08148	1.50712	4.17322	34.7901	2.78204e-05	0.000329822	116	131	98	418	474	730	none	Ricin B%2C lectin domain
COO91_01504	1.50662	1.21491	14.2103	0.00152973	0.00834145	9	8	2	22	35	33	none	Transposase%2C TnpA family
COO91_09973	1.50578	2.4357	25.9523	9.01633e-05	0.000855327	19	10	13	60	80	58	none	hypothetical protein
COO91_10612	1.50419	2.40975	24.7749	0.000115085	0.00104416	17	14	9	53	65	70	none	Transposase
COO91_11133	1.50268	4.13826	61.5474	4.77733e-07	1.27364e-05	63	73	57	274	297	330	none	hypothetical protein
COO91_02618	1.50182	5.8513	37.5927	3.5429e-05	0.000400714	322	306	296	1148	1645	1551	none	Protoporphyrinogen oxidase
COO91_11132	1.49992	1.03853	9.86416	0.005964	0.0248764	5	6	8	24	38	28	none	Protein of unknown function DUF1392
COO91_07855	1.49779	0.2181	8.81551	0.00860719	0.0332018	2	3	3	14	13	11	none	hypothetical protein
COO91_07539	1.4971	3.46558	53.0564	1.28157e-06	2.79657e-05	54	37	35	165	206	218	none	O-antigen ligase
COO91_08007	1.49483	0.851686	10.9651	0.00413035	0.0184587	6	7	3	23	25	27	none	hypothetical protein
COO91_10273	1.49417	5.55538	83.5099	5.73253e-08	2.41691e-06	141	139	137	598	665	676	none	Cell division ATPase FtsA
COO91_09854	1.49104	2.21259	19.0576	0.000421825	0.00297837	19	10	4	51	57	45	none	Large exoprotein involved in heme utilization or adhesion
COO91_08638	1.48861	3.07602	24.8944	0.000122233	0.00109524	42	45	26	118	249	160	none	hypothetical protein
COO91_10221	1.48767	4.09227	64.7627	3.38151e-07	9.81274e-06	75	102	57	263	402	420	none	hypothetical protein
COO91_10445	1.48631	0.543796	8.33398	0.0102485	0.0382121	3	2	5	17	10	20	none	Protein of unknown function DUF192
COO91_09855	1.48416	2.98652	27.709	6.34491e-05	0.00063297	23	20	11	68	89	93	none	IS4 transposase
COO91_09599	1.47917	1.28716	21.8277	0.000219175	0.00178775	10	6	7	29	39	39	none	hypothetical protein
COO91_10369	1.47824	2.68255	30.5007	3.73564e-05	0.000417712	44	32	60	141	228	268	none	Methyl-accepting chemotaxis protein
COO91_02616	1.478	6.18521	105.328	1.06343e-08	6.46662e-07	499	469	391	1685	2504	2078	none	hypothetical protein
COO91_01340	1.47231	1.37941	22.7867	0.000176747	0.00149462	8	9	10	44	44	36	none	hypothetical protein
COO91_11089	1.47202	1.1567	18.2615	0.000514273	0.00349215	8	6	11	31	37	48	none	Site-specific recombinase XerD
COO91_07114	1.47105	0.349402	8.79157	0.00868138	0.0334403	7	3	2	12	18	26	none	hypothetical protein
COO91_01791	1.4696	1.08557	13.5939	0.00183042	0.00966932	10	6	5	26	35	36	none	Conserved hypothetical protein CHP00725
COO91_02151	1.46642	1.34767	19.8925	0.000344379	0.00253403	7	13	9	49	47	36	none	Glycosyltransferase involved in cell wall bisynthesis
COO91_03465	1.46244	2.58199	32.1364	2.77987e-05	0.000329822	20	21	15	57	92	108	none	hypothetical protein
COO91_04773	1.46133	0.799436	13.6661	0.00179193	0.00948657	5	8	6	27	31	29	none	hypothetical protein
COO91_02292	1.46052	4.48383	87.7031	4.0364e-08	1.83507e-06	116	109	104	428	587	484	none	Type V secretory pathway%2C adhesin AidA
COO91_09720	1.45948	3.62088	38.8296	9.1483e-06	0.000132381	16	18	28	79	108	97	none	hypothetical protein
COO91_05634	1.45878	6.51387	63.3176	6.52801e-07	1.66257e-05	324	290	247	1166	1376	1360	none	hypothetical protein
COO91_09623	1.45854	8.60892	173.673	2.38962e-10	4.2402e-08	989	1061	811	3727	4793	4441	none	Catechol 2%2C3-dioxygenase or other lactoylglutathione lyase family enzyme
COO91_07200	1.45591	0.787537	13.4802	0.00189286	0.00994095	5	7	4	24	33	16	none	hypothetical protein
COO91_10680	1.45245	3.20497	45.5015	3.43741e-06	5.93406e-05	36	49	44	169	201	214	none	hypothetical protein
COO91_02197	1.45213	5.35169	31.4598	7.17985e-05	0.000709076	108	113	107	382	659	451	none	Negative regulator of GroEL%2C containings thioredoxin-like and TPR-like domains
COO91_02726	1.45128	4.06801	55.1061	9.99138e-07	2.27199e-05	99	96	76	350	482	392	none	PEP-CTERM protein-sorting domain
COO91_01127	1.45094	4.00098	45.9314	3.23936e-06	5.67359e-05	29	36	24	122	135	144	none	hypothetical protein
COO91_10367	1.44854	7.57344	38.2698	4.01176e-05	0.000443331	1691	1400	1383	4691	6527	9133	none	Ca2+-binding protein%2C RTX toxin-related
COO91_04266	1.44373	4.01273	55.2645	9.80396e-07	2.24351e-05	68	79	64	271	320	357	none	hypothetical protein
COO91_01701	1.44198	1.24121	11.7015	0.00326052	0.0153243	11	10	8	26	55	51	none	PEP-CTERM protein-sorting domain
COO91_10047	1.43974	0.933549	12.6733	0.00241138	0.0121501	2	8	5	18	23	27	none	Superfamily II DNA or RNA helicase%2C SNF2 family
COO91_07193	1.43768	3.25695	33.0857	2.35266e-05	0.000289049	20	41	18	105	147	100	none	hypothetical protein
COO91_09747	1.43531	8.38105	92.8982	2.66429e-08	1.31083e-06	1581	1735	1366	5172	8583	7252	none	hypothetical protein
COO91_10683	1.43514	4.05461	45.0833	3.64316e-06	6.22821e-05	61	77	57	254	341	275	none	hypothetical protein
COO91_06045	1.43143	6.41382	149.213	7.72058e-10	9.71716e-08	518	546	445	1932	2580	2206	none	Glucose/arabinose dehydrogenase%2C beta-propeller fold
COO91_09421	1.4301	0.735358	8.35613	0.0101656	0.0379431	7	7	7	31	36	27	none	hypothetical protein
COO91_06409	1.42674	3.80422	35.1327	1.65972e-05	0.000217228	33	63	41	170	238	200	none	Glycosyltransferase%2C GT2 family
COO91_09723	1.42423	7.7557	73.8167	2.03168e-07	6.37419e-06	705	734	683	2693	3445	3283	none	Cdc6-related protein%2C AAA superfamily ATPase
COO91_04239	1.42332	2.31817	21.0549	0.000261747	0.00206648	21	9	10	43	79	57	none	hypothetical protein
COO91_01915	1.42293	1.4027	17.715	0.000590887	0.00391178	8	9	9	45	42	28	none	hypothetical protein
COO91_01802	1.41957	3.10657	32.7227	2.50672e-05	0.00030452	48	32	24	137	162	160	none	Multidrug efflux pump subunit AcrA
COO91_00766	1.41855	4.23342	40.5591	7.01965e-06	0.000106436	68	42	53	212	235	275	ABC.MS.P1	multiple sugar transport system permease protein
COO91_11149	1.41814	1.69901	10.8152	0.00433792	0.0192496	14	6	1	29	34	30	parB	chromosome partitioning protein, ParB family
COO91_00908	1.41379	3.01755	51.1288	1.63084e-06	3.31316e-05	26	27	26	97	119	133	none	Transposase
COO91_07783	1.40612	0.157322	8.35318	0.0101766	0.0379703	3	7	2	16	17	20	none	Endonuclease YncB%2C thermonuclease family
COO91_08915	1.40507	1.65615	19.5649	0.000372686	0.0026893	13	7	12	53	43	44	none	hypothetical protein
COO91_06405	1.40214	2.94578	23.6358	0.000146755	0.00128	28	19	28	74	149	109	none	Glycosyltransferase involved in cell wall bisynthesis
COO91_00769	1.4016	4.90763	76.7269	1.04465e-07	3.74413e-06	122	88	108	411	530	452	ABC.MS.S	multiple sugar transport system substrate-binding protein
COO91_01935	1.40044	3.45312	23.5315	0.000155457	0.00134613	28	38	24	96	152	146	none	Transposase InsO
COO91_09858	1.39679	2.59964	30.2193	3.93466e-05	0.000436808	30	29	34	102	138	168	none	Large exoprotein involved in heme utilization or adhesion
COO91_08930	1.3962	6.56872	80.3894	7.51553e-08	2.9474e-06	443	328	340	1227	1927	1712	amt	ammonium transporter, Amt family
COO91_08189	1.39175	5.17398	81.4566	6.84399e-08	2.74368e-06	104	135	118	483	507	553	none	Taurine dioxygenase%2C alpha-ketoglutarate-dependent
COO91_08283	1.38976	1.63119	20.6983	0.000284456	0.00220389	11	26	14	70	89	61	none	hypothetical protein
COO91_02529	1.38515	2.97826	44.338	4.04486e-06	6.76686e-05	35	41	36	140	182	162	none	Cytochrome c%2C mono- and diheme variants
COO91_00830	1.38413	8.2305	199.976	7.93055e-11	1.78834e-08	1050	1100	999	3927	5142	4519	none	Cation transport ATPase
COO91_09418	1.37992	2.28836	27.5683	6.52248e-05	0.000648891	22	23	15	67	110	82	none	hypothetical protein
COO91_01953	1.37872	4.67484	94.5769	2.33949e-08	1.16694e-06	90	112	104	354	513	453	none	Acyl-CoA synthetase
COO91_10590	1.3767	7.56596	105.978	1.01622e-08	6.24974e-07	1022	1034	939	3390	4499	5007	none	Large exoprotein involved in heme utilization or adhesion
COO91_07109	1.37623	4.2476	59.7481	5.83339e-07	1.50241e-05	87	71	84	296	415	332	none	hypothetical protein
COO91_09314	1.37506	0.950142	9.50464	0.00675011	0.0273953	3	6	6	20	30	15	none	Site-specific recombinase XerD
COO91_03431	1.37281	0.890451	10.8403	0.00430234	0.0191089	3	4	5	17	18	17	none	hypothetical protein
COO91_02617	1.37254	3.15273	43.7332	4.40742e-06	7.24288e-05	63	49	56	169	263	294	none	Glycosyltransferase involved in cell wall bisynthesis
COO91_03772	1.37127	1.16115	9.19678	0.00751714	0.030002	5	6	7	32	26	19	none	Glycogen synthase
COO91_11028	1.36749	1.44878	18.3658	0.000500966	0.00341895	13	8	16	39	70	51	none	hypothetical protein
COO91_00862	1.36736	1.78145	13.9571	0.00164594	0.00882574	12	11	7	31	62	36	xerC	integrase/recombinase XerC
COO91_10220	1.36476	4.00363	38.0856	1.02791e-05	0.000146395	82	99	67	268	407	382	none	hypothetical protein
COO91_06339	1.36355	1.63275	15.8691	0.000961775	0.00579313	11	14	12	45	57	56	none	hypothetical protein
COO91_08805	1.36033	0.841823	12.3589	0.00265535	0.0130702	7	9	6	37	30	26	none	Prokaryotic membrane lipoprotein lipid attachment site profile
COO91_06210	1.35903	2.06825	15.3991	0.00109402	0.00640092	21	17	17	58	94	83	none	hypothetical protein
COO91_01251	1.35595	0.917649	14.1969	0.00153564	0.00836104	5	8	6	23	28	30	none	hypothetical protein
COO91_04961	1.35552	5.85993	22.4916	0.000493029	0.00337723	269	280	202	996	1248	912	none	YiaAB two helix
COO91_10122	1.35175	1.35844	9.33283	0.00716663	0.0287622	4	7	7	17	26	34	none	putative membrane protein
COO91_00785	1.35131	1.008	8.68413	0.0090234	0.0344512	11	2	9	26	34	34	none	Chromosome segregation ATPase
COO91_07536	1.35054	3.25647	42.4692	5.28867e-06	8.34469e-05	32	41	55	155	208	180	none	Glycosyltransferase involved in cell wall bisynthesis
COO91_09413	1.34993	3.56591	22.144	0.000222517	0.00181092	32	43	27	105	166	160	none	Transposase InsO
COO91_07773	1.34803	1.54497	11.3575	0.0036382	0.0167574	10	12	14	48	55	49	none	IS4 transposase
COO91_11098	1.3473	2.19866	16.1996	0.000879539	0.00540609	14	11	13	43	63	55	none	hypothetical protein
COO91_03773	1.34565	1.58418	11.1027	0.00394968	0.0178279	12	12	3	27	45	42	none	Glycosyltransferase%2C catalytic subunit of cellulose synthase and poly-beta-1%2C6-N-acetylglucosamine synthase
COO91_00767	1.3414	4.12706	55.629	9.38741e-07	2.1619e-05	70	51	43	187	254	247	ABC.MS.P	multiple sugar transport system permease protein
COO91_07071	1.33901	2.74824	37.413	1.14371e-05	0.00016094	23	16	20	78	78	91	none	8-oxo-dGTP pyrophosphatase MutT and related house-cleaning NTP pyrophosphohydrolases%2C NUDIX family
COO91_06811	1.33761	3.09867	30.8678	3.49273e-05	0.000396563	19	24	36	90	134	109	none	Ketosteroid isomerase
COO91_09724	1.33757	4.63549	50.18	1.84095e-06	3.66295e-05	85	76	81	277	365	373	none	hypothetical protein
COO91_01379	1.33656	4.57483	26.4849	0.000123962	0.00110934	75	90	73	321	328	339	none	protein of unknown function DUF4397
COO91_08370	1.33525	3.30779	23.0832	0.000165557	0.00141213	25	36	30	109	151	120	none	ATPase components of ABC transporters with duplicated ATPase domains
COO91_05623	1.33478	1.44217	11.4077	0.00358011	0.0165674	11	6	11	31	41	46	mazE	cell growth regulatory protein
COO91_10817	1.33464	1.84236	12.0933	0.00288315	0.0138822	4	3	10	19	29	24	none	Mobile element protein
COO91_02993	1.33406	2.40262	32.0084	2.84385e-05	0.000336414	16	24	13	60	83	78	none	putative membrane protein
COO91_09593	1.33342	1.62743	15.1684	0.00116631	0.00669006	13	7	11	37	34	59	none	hypothetical protein
COO91_10342	1.33155	0.728977	8.30642	0.0103527	0.0384944	7	4	4	18	12	33	none	hypothetical protein
COO91_06781	1.33094	2.15305	19.1337	0.000414014	0.00293278	19	24	10	71	78	70	none	GGDEF domain
COO91_10234	1.33072	6.00989	66.3735	2.8587e-07	8.57133e-06	518	412	507	1460	1940	2636	none	hypothetical protein
COO91_10434	1.32878	2.57099	32.3395	2.68163e-05	0.000320375	19	26	22	76	96	107	none	DNA primase
COO91_01998	1.32369	1.12108	11.9559	0.0030096	0.0143886	11	5	6	23	32	37	parB	chromosome partitioning protein, ParB family
COO91_03709	1.32116	7.03959	31.7613	8.70413e-05	0.00083154	361	397	330	1206	1681	1613	none	Polysaccharide pyruvyl transferase family protein WcaK
COO91_05566	1.31949	4.03449	38.5113	9.61399e-06	0.000138013	51	26	37	146	160	165	none	Nitroreductase
COO91_10411	1.31693	0.458936	9.10813	0.00775591	0.0307059	6	4	3	18	22	14	none	hypothetical protein
COO91_01466	1.31631	5.32832	89.5104	3.48516e-08	1.65453e-06	190	216	189	807	797	830	none	Beta-phosphoglucomutase or related phosphatase%2C HAD superfamily
COO91_07970	1.31592	0.79779	11.8874	0.00307491	0.0146041	7	7	5	19	25	35	none	Transposase%2C IS5 family
COO91_09607	1.31496	3.15958	32.5097	2.60232e-05	0.00031332	24	29	21	72	118	116	none	hypothetical protein
COO91_07750	1.31245	2.38981	33.6371	2.13858e-05	0.000268538	29	23	23	94	104	110	none	hypothetical protein
COO91_01465	1.31132	2.85353	46.4597	3.01324e-06	5.38314e-05	39	37	29	147	157	124	recD	exodeoxyribonuclease V alpha subunit [EC:3.1.11.5]
COO91_00280	1.31073	3.17767	24.9169	0.000111705	0.00101605	37	24	35	108	113	175	none	Serine/threonine protein kinase
COO91_05371	1.30775	1.95654	21.1365	0.000256841	0.00203071	21	22	22	75	100	92	none	cAMP-binding domain of CRP or a regulatory subunit of cAMP-dependent protein kinases
COO91_09592	1.30733	5.26659	111.384	7.03038e-09	4.75605e-07	166	177	153	552	726	754	none	DNA-binding response regulator%2C NarL/FixJ family%2C containings REC and HTH domains
COO91_10288	1.30682	2.0532	10.7403	0.00450475	0.0198532	13	9	17	24	75	64	none	Cellulose biosynthesis protein BcsQ
COO91_00154	1.30597	0.818951	13.5178	0.00187191	0.00984525	8	9	6	21	35	39	none	Glutaminase
COO91_00917	1.3046	1.76144	18.9881	0.000429106	0.00302189	12	12	16	51	59	54	none	IS4 transposase
COO91_10473	1.3031	3.34442	24.3236	0.000126613	0.00112888	24	39	31	107	152	125	parB	chromosome partitioning protein, ParB family
COO91_09029	1.30261	6.03224	82.2805	6.37142e-08	2.62221e-06	365	363	390	1333	1614	1622	none	Zn-dependent protease with chaperone function
COO91_10613	1.30229	2.64473	15.3082	0.00112188	0.00652644	19	17	12	55	67	74	none	Transposase
COO91_05222	1.30077	3.86629	55.8598	9.13389e-07	2.1125e-05	50	42	46	166	206	191	none	Radical SAM superfamily enzyme YgiQ%2C UPF0313 family
COO91_07522	1.29954	10.8197	64.89	4.17619e-07	1.16804e-05	3721	3371	3239	11040	16663	14533	psaB_2	photosystem I P700 chlorophyll a apoprotein A2
COO91_11166	1.29914	2.14592	24.7632	0.000115369	0.00104586	12	25	15	64	69	78	none	23S rRNA-intervening sequence protein
COO91_02525	1.2976	3.25121	29.7543	4.29013e-05	0.000466697	28	32	51	118	176	162	loxA	arachidonate 15-lipoxygenase [EC:1.13.11.33]
COO91_11191	1.29617	2.58676	15.6028	0.00103434	0.006138	19	11	31	65	94	92	none	hypothetical protein
COO91_01383	1.29597	5.41806	71.8077	1.66049e-07	5.46297e-06	174	149	130	484	722	638	none	Thiaminase
COO91_10052	1.29595	2.445	24.5117	0.000121658	0.00109281	15	16	14	55	73	55	none	Serine/threonine protein kinase
COO91_09461	1.29464	2.5197	10.4954	0.00522935	0.0224881	10	18	19	70	69	51	none	putative enzyme involved in methoxymalonyl-ACP biosynthesis
COO91_06900	1.28854	2.7447	31.9954	2.85043e-05	0.000336823	21	32	28	106	93	127	none	FdxN element excision controlling factor protein
COO91_04737	1.28716	1.82312	14.2362	0.00151835	0.00829193	37	22	10	68	113	98	ancrpB	transcriptional regulator
COO91_10664	1.28683	3.14015	40.8793	6.68982e-06	0.00010271	33	35	32	130	118	154	none	Ribonuclease HI
COO91_03930	1.28559	2.37954	26.6583	7.81499e-05	0.00075797	13	21	12	46	65	75	none	Cytochrome P450
COO91_04195	1.28497	1.33125	9.30026	0.00724884	0.029049	11	12	4	31	54	24	pstA	phosphate transport system permease protein
COO91_08188	1.28223	4.25425	64.9917	3.30107e-07	9.64891e-06	54	65	64	227	250	258	tauD	taurine dioxygenase [EC:1.14.11.17]
COO91_10098	1.28222	4.13715	23.7149	0.000191927	0.00160047	67	85	80	246	377	314	none	hypothetical protein
COO91_00036	1.28158	3.76557	16.356	0.00121545	0.00692973	52	55	58	175	275	217	none	hypothetical protein
COO91_00100	1.28158	3.76557	16.356	0.00121545	0.00692973	52	55	58	175	275	217	none	hypothetical protein
COO91_01188	1.28	1.50791	13.5275	0.00186658	0.00982263	15	8	7	23	47	52	metN	D-methionine transport system ATP-binding protein
COO91_11165	1.27682	1.93918	9.29007	0.00732967	0.0293404	14	12	6	40	35	53	none	hypothetical protein
COO91_08919	1.27476	1.2589	13.7574	0.00174462	0.0092886	6	9	6	18	37	30	none	putative transposase YbfD/YdcC associated with H repeats
COO91_08286	1.27472	5.28787	20.9436	0.000557938	0.00374171	143	368	186	921	1079	746	none	hypothetical protein
COO91_03058	1.27367	2.32035	16.7376	0.000762008	0.00479533	30	29	33	73	156	144	none	hypothetical protein
COO91_07850	1.27358	0.657519	12.1786	0.00280767	0.013634	5	7	8	19	31	31	none	Superfamily II DNA or RNA helicase%2C SNF2 family
COO91_11018	1.27281	2.46322	23.9622	0.000136783	0.00120369	42	39	33	95	198	167	none	Zn-dependent oligopeptidases
COO91_09835	1.27176	1.26818	16.4467	0.000823207	0.00511797	8	9	5	28	33	27	none	hypothetical protein
COO91_03113	1.27026	4.71027	77.1969	1.0007e-07	3.62259e-06	79	80	71	259	355	304	psaK_1	photosystem I subunit X
COO91_05565	1.26992	4.07935	25.5799	9.99436e-05	0.000925397	36	44	45	173	169	154	none	Ankyrin repeat
COO91_08119	1.26902	0.356842	10.1982	0.00532522	0.0227198	8	7	7	18	40	31	none	DNA-binding response regulator%2C OmpR family%2C containings REC and winged-helix
COO91_10834	1.26836	4.19101	47.6966	2.54974e-06	4.72576e-05	89	79	71	273	353	326	none	ATPase involved in DNA repair
COO91_11151	1.26614	1.16947	11.3796	0.00361247	0.016684	7	7	5	22	22	32	none	Deoxyribonuclease I
COO91_07186	1.2655	2.96242	37.9292	1.05361e-05	0.000149662	29	40	38	113	148	166	none	Isopropylmalate/homocitrate/citramalate synthases
COO91_06407	1.26487	4.45618	14.2919	0.00237223	0.0119874	72	60	62	198	295	282	none	Glycosyltransferase involved in cell wall bisynthesis
COO91_06260	1.26365	7.23136	60.6278	6.61789e-07	1.67049e-05	909	920	832	3244	3854	3435	none	Ferritin-like superfamily
COO91_07961	1.26294	2.20738	17.5349	0.000618872	0.00405734	9	23	14	67	56	58	none	phycobilisome protein
COO91_09674	1.26262	6.33369	88.6484	3.73679e-08	1.72539e-06	267	292	236	883	1240	1029	none	Autotransporter translocation and assembly factor TamB
COO91_10217	1.2613	3.86187	43.4819	4.56868e-06	7.4363e-05	72	73	71	221	299	340	none	hypothetical protein
COO91_04070	1.26127	4.09826	58.5278	6.69778e-07	1.6782e-05	77	61	65	235	321	250	none	Inosine/uridine-preferring nucleoside hydrolase domain
COO91_07537	1.25993	3.84344	40.0833	7.54402e-06	0.000112785	74	58	55	179	275	291	none	Membrane protein involved in the export of O-antigen and teichoic acid
COO91_08945	1.25951	6.77868	82.8411	6.07069e-08	2.51759e-06	594	582	497	1834	2456	2334	none	hypothetical protein
COO91_02532	1.25939	2.59428	22.1503	0.000203743	0.00168088	37	29	25	107	132	121	none	Triacylglycerol esterase/lipase EstA%2C alpha/beta hydrolase fold
COO91_04131	1.25762	4.56215	43.9579	4.26866e-06	7.04329e-05	173	213	153	511	739	886	none	Ca2+-binding protein%2C RTX toxin-related
COO91_11034	1.25635	0.775005	10.6472	0.0045845	0.0201636	7	6	6	30	27	18	none	DNA-binding transcriptional regulator YiaG%2C XRE-type HTH domain
COO91_06155	1.25131	4.23315	43.6049	4.48892e-06	7.3597e-05	85	84	76	252	390	326	none	CheY chemotaxis protein or a CheY-like REC
COO91_00868	1.24975	3.27556	10.3561	0.00655778	0.0267687	25	45	36	101	172	146	none	Transposase
COO91_01294	1.24975	3.27556	10.3561	0.00655778	0.0267687	25	45	36	101	172	146	none	Transposase
COO91_08807	1.24863	1.3571	14.6453	0.00135095	0.00754523	12	13	9	28	67	40	ampG	MFS transporter, PAT family, beta-lactamase induction signal transducer AmpG
COO91_10818	1.24835	2.60639	28.485	5.45759e-05	0.000566919	15	21	17	55	80	74	none	Transposase%2C IS1 family
COO91_00728	1.24638	3.27451	10.3	0.00667002	0.0271211	25	45	36	101	172	145	none	Transposase
COO91_07675	1.24638	3.27451	10.3	0.00667002	0.0271211	25	45	36	101	172	145	none	Transposase
COO91_10471	1.24535	1.68721	17.7948	0.000578942	0.00385033	13	8	7	34	34	42	none	Prokaryotic membrane lipoprotein lipid attachment site profile
COO91_08421	1.24294	4.94	26.4785	0.000127674	0.0011346	142	119	118	403	575	510	none	hypothetical protein
COO91_00909	1.23881	3.17069	34.5193	1.83986e-05	0.000236235	25	34	36	104	130	138	none	hypothetical protein
COO91_09035	1.23718	1.35265	8.61127	0.00926401	0.0352456	8	10	6	26	38	30	none	Prokaryotic membrane lipoprotein lipid attachment site profile
COO91_09604	1.23656	6.42054	107.248	9.30642e-09	5.8227e-07	306	349	320	1136	1344	1313	recD	exodeoxyribonuclease V alpha subunit [EC:3.1.11.5]
COO91_00649	1.23499	2.38932	25.9813	8.96299e-05	0.000851759	15	26	25	70	101	87	none	DNA-binding response regulator%2C OmpR family%2C containings REC and winged-helix
COO91_02666	1.23485	7.44121	83.0002	5.98825e-08	2.49295e-06	979	856	799	2930	3826	3498	rfbB	dTDP-glucose 4-6-dehydratase
COO91_10180	1.23326	3.79482	21.2826	0.000278173	0.00216771	46	61	54	206	228	189	none	hypothetical protein
COO91_09806	1.23215	5.36529	52.6396	1.34934e-06	2.91126e-05	204	200	192	572	777	979	none	Ca2+-binding protein%2C RTX toxin-related
COO91_09619	1.23104	6.14358	56.2233	8.74998e-07	2.06339e-05	317	345	240	1024	1259	1200	none	Tetratricopeptide
COO91_08396	1.22431	2.08811	13.9723	0.00163869	0.00879819	22	20	15	56	75	90	none	Mobile element protein
COO91_08079	1.22217	2.19244	25.8442	9.21791e-05	0.000871395	26	24	19	79	97	90	none	hypothetical protein
COO91_09606	1.21795	1.47679	8.62961	0.00920276	0.0350618	7	11	3	22	28	31	none	hypothetical protein
COO91_00251	1.2159	3.00059	23.9334	0.00013763	0.00120918	35	25	14	87	97	99	none	hypothetical protein
COO91_01392	1.21473	1.57213	11.9057	0.00305735	0.0145424	9	11	19	42	50	59	none	hypothetical protein
COO91_09265	1.21265	3.76466	34.5634	1.8262e-05	0.000235039	118	118	93	301	455	510	none	Large exoprotein involved in heme utilization or adhesion
COO91_06436	1.2113	5.28142	48.8271	2.19495e-06	4.21063e-05	133	124	142	404	475	657	none	hypothetical protein
COO91_10291	1.20889	2.36823	12.7454	0.00235909	0.0119451	17	18	13	40	86	59	none	hypothetical protein
COO91_09169	1.20651	1.51221	15.2909	0.00112728	0.00653893	10	15	22	49	74	58	none	hypothetical protein
COO91_04715	1.20535	4.96127	79.7225	7.9724e-08	3.01779e-06	146	161	164	469	637	699	ABC-2.A	ABC-2 type transport system ATP-binding protein
COO91_11201	1.20454	2.4234	11.6527	0.0033113	0.0155053	19	7	18	38	67	65	none	hypothetical protein
COO91_02977	1.20375	1.88465	8.514	0.00971923	0.036745	15	13	11	41	45	63	none	hypothetical protein
COO91_06081	1.20325	1.46044	19.1588	0.000411467	0.00291665	12	14	17	42	51	72	none	Transposase
COO91_09179	1.20271	6.42121	88.8178	3.6858e-08	1.71961e-06	375	336	358	1165	1523	1391	none	2-polyprenyl-3-methyl-5-hydroxy-6-metoxy-1%2C4-benzoquinol methylase
COO91_09882	1.20185	2.47558	17.0519	0.000701565	0.00448273	15	12	18	50	51	71	none	hypothetical protein
COO91_04421	1.20092	0.9746	8.69602	0.00898481	0.0343281	12	5	7	37	34	20	none	DNA-binding response regulator%2C OmpR family%2C containings REC and winged-helix
COO91_01323	1.1999	3.95971	50.2846	1.81636e-06	3.62068e-05	60	71	62	184	250	302	none	putative protein YjbI%2C containings pentapeptide repeats
COO91_06410	1.1987	4.22277	39.4111	8.36103e-06	0.000122297	45	86	61	198	254	276	none	Glycosyltransferase involved in cell wall bisynthesis
COO91_07461	1.19666	0.976424	10.3024	0.00514203	0.0221654	8	4	10	27	23	34	none	hypothetical protein
COO91_10474	1.19606	4.13139	49.0472	2.13252e-06	4.12186e-05	72	65	56	203	297	232	parA	chromosome partitioning protein
COO91_08957	1.19603	5.6827	51.7884	1.50057e-06	3.13555e-05	120	161	111	402	586	495	fus	translation elongation factor EF-G
COO91_04772	1.19407	4.61006	61.8054	4.64426e-07	1.24478e-05	101	92	94	315	393	379	none	Esterase/lipase
COO91_02236	1.19346	2.90026	22.6898	0.000180585	0.00151952	34	28	15	105	90	93	chrA	chromate transporter
COO91_11179	1.19299	4.50212	31.5024	3.11341e-05	0.000362361	74	63	63	234	279	242	none	Tetratricopeptide-like helical domain
COO91_04137	1.19089	3.66953	33.1786	2.31498e-05	0.000285735	62	42	30	143	175	187	none	Thioredoxin-like fold
COO91_08576	1.19062	3.84421	44.7778	3.80216e-06	6.41037e-05	59	60	44	158	214	244	none	hypothetical protein
COO91_09168	1.19058	2.53019	21.3459	0.00024471	0.00195191	25	38	40	112	155	123	none	hypothetical protein
COO91_08316	1.1894	5.6618	29.5954	7.77811e-05	0.00075507	206	285	236	843	1039	849	none	Tetratricopeptide
COO91_07540	1.18505	4.60412	36.6717	1.28856e-05	0.000177901	136	117	112	374	540	462	none	putative SAM-depedendent methyltransferase
COO91_08490	1.18271	3.50046	47.0363	2.78638e-06	5.06036e-05	62	57	47	174	214	235	none	Transposase DDE domain
COO91_02910	1.18168	1.82536	10.1294	0.00545022	0.0231164	9	21	7	44	52	42	none	Prokaryotic membrane lipoprotein lipid attachment site profile
COO91_08543	1.18129	2.44419	13.6594	0.00179549	0.00949874	15	12	21	35	85	63	ABC-2.A	ABC-2 type transport system ATP-binding protein
COO91_11090	1.1811	2.26725	12.1252	0.00285463	0.0137949	9	18	10	37	51	51	none	hypothetical protein
COO91_03573	1.18084	2.13434	8.93625	0.00853435	0.0329914	21	13	16	46	73	70	yefM	antitoxin YefM
COO91_07847	1.17534	2.89953	27.8951	6.11826e-05	0.000614894	19	25	19	71	86	78	DnaJ8	Curved DNA-binding protein CbpA%2C containings a DnaJ-like domain
COO91_06822	1.17528	3.32579	47.7931	2.51707e-06	4.68122e-05	49	62	48	162	223	209	none	hypothetical protein
COO91_00157	1.17467	1.70548	7.71863	0.0128869	0.0460202	14	6	11	29	54	34	none	hypothetical protein
COO91_10442	1.17427	2.7198	27.6239	6.45164e-05	0.000643025	25	18	24	83	92	75	none	hypothetical protein
COO91_06515	1.17399	3.44377	26.1704	8.62443e-05	0.000825304	63	48	49	203	210	181	rps21 rps21B	30S ribosomal protein S21
COO91_10564	1.17368	8.02805	146.519	8.87776e-10	1.03326e-07	1080	1111	1028	3501	4534	3969	none	Cation transport ATPase
COO91_01147	1.17187	3.52652	44.1006	4.18306e-06	6.95507e-05	66	58	47	176	217	244	none	Transposase DDE domain
COO91_10116	1.17074	3.70451	25.363	0.000101786	0.00093924	48	47	57	164	223	181	none	putative membrane protein YbaN%2C DUF454 family
COO91_09626	1.16986	0.959207	9.11314	0.00774219	0.0306628	5	8	7	21	35	19	none	IS4 transposase
COO91_04746	1.16889	3.18301	13.3546	0.00229487	0.0117058	57	37	39	125	161	211	none	hypothetical protein
COO91_01216	1.16863	2.17356	18.275	0.000512532	0.00348251	17	20	19	56	72	81	none	2-polyprenyl-3-methyl-5-hydroxy-6-metoxy-1%2C4-benzoquinol methylase
COO91_09464	1.16768	2.22668	14.7929	0.00129571	0.00729696	12	19	8	48	44	52	paaH	3-hydroxybutyryl-CoA dehydrogenase [EC:1.1.1.157]
COO91_09405	1.16733	2.78959	28.0881	5.89277e-05	0.000596664	28	21	22	87	82	94	none	Fatty acid desaturase
COO91_00731	1.16605	1.41341	8.84452	0.00851824	0.0329517	4	21	10	34	49	47	none	Type II restriction/modification system%2C DNA methylase subunit YeeA
COO91_04338	1.16577	1.90214	15.7262	0.000999977	0.00596679	7	16	15	35	53	54	pex	Pex protein
COO91_10963	1.16548	3.21764	34.8857	1.72976e-05	0.000225035	55	49	68	203	214	222	none	hypothetical protein
COO91_09205	1.16548	3.56611	14.0743	0.00184901	0.00975327	21	56	32	128	117	156	none	Arc-type ribbon-helix-helix
COO91_09215	1.1653	2.22466	17.304	0.000656948	0.00425514	16	19	26	79	73	74	none	IS4 transposase
COO91_06682	1.16473	4.40443	26.5625	8.85325e-05	0.000844296	123	96	109	280	533	416	phoU	phosphate transport system regulatory protein /PhoU family transcriptional regulator
COO91_06046	1.16419	5.55053	84.4787	5.27935e-08	2.27664e-06	324	326	288	1019	1351	1102	none	Beta-glucanase%2C GH16 family
COO91_01228	1.16153	4.42317	33.853	2.06076e-05	0.000259368	50	45	62	137	214	236	none	Acyl-CoA synthetase
COO91_01815	1.15925	3.14163	15.7799	0.000985441	0.00591108	27	19	39	89	146	82	none	hypothetical protein
COO91_09591	1.15882	4.52522	36.7159	1.27937e-05	0.000177534	90	134	79	301	430	384	none	Signal transduction histidine kinase
COO91_06316	1.1586	0.872029	10.1493	0.00541364	0.0229973	11	9	5	22	43	28	none	hypothetical protein
COO91_08916	1.1585	4.68232	12.6654	0.00392585	0.01775	110	241	146	449	764	621	none	hypothetical protein
COO91_06675	1.1563	3.93257	20.789	0.000309957	0.00235436	79	80	57	202	287	308	none	hypothetical protein
COO91_10565	1.15582	4.80082	63.301	3.94983e-07	1.12508e-05	134	134	127	407	574	477	none	hypothetical protein
COO91_09360	1.15577	1.93561	10.2241	0.00527898	0.0226117	16	7	17	29	74	47	none	AAA+-type ATPase%2C SpoVK/Ycf46/Vps4 family
COO91_09059	1.15577	5.20201	39.3957	8.38083e-06	0.000122421	146	172	130	402	747	508	none	Photosystem II reaction centre protein Ycf12
COO91_08582	1.15502	5.18795	24.8325	0.00016101	0.00138308	89	118	115	348	407	431	none	protein of unknown function DUF4397
COO91_03858	1.15309	3.87878	28.8778	5.06209e-05	0.000536126	67	38	43	151	208	187	none	hypothetical protein
COO91_00915	1.15293	1.10363	10.9635	0.00413261	0.0184612	11	12	4	31	30	38	none	Ubiqui/menaqui biosynthesis C-methylase UbiE
COO91_04194	1.15151	2.06784	9.74565	0.00628594	0.0258999	20	20	19	66	97	54	pstC	phosphate transport system permease protein
COO91_01835	1.1495	1.31492	7.64525	0.0132501	0.0470165	13	13	9	33	51	45	gph	phosphoglycolate phosphatase [EC:3.1.3.18]
COO91_06507	1.14883	2.86533	28.2377	5.72439e-05	0.000585641	36	23	31	98	120	113	none	hypothetical protein
COO91_10436	1.1473	4.35207	40.2035	7.40751e-06	0.000111051	76	66	65	224	264	270	none	hypothetical protein
COO91_00341	1.14676	4.92619	26.9543	8.63123e-05	0.000825304	75	130	89	314	405	353	none	Molybdenum cofactor biosynthesis enzyme MoaA
COO91_11060	1.14624	1.82935	7.91819	0.011955	0.0432635	14	11	10	32	54	43	SIG2	RNA polymerase nonessential primary-like sigma factor
COO91_01393	1.146	4.47132	27.5981	6.48438e-05	0.000645694	72	85	72	237	318	283	none	hypothetical protein
COO91_05590	1.14493	2.5516	12.8942	0.00225509	0.0115466	5	12	7	26	34	28	hupA	hydrogenase expression/formation protein
COO91_07239	1.14225	4.81558	63.1403	4.01858e-07	1.13274e-05	98	94	115	306	401	420	none	Endonuclease%2C Uma2 family
COO91_03707	1.14109	6.6163	75.4726	1.17288e-07	4.16239e-06	442	471	449	1448	1831	1689	E2.4.1.187	N-acetylglucosaminyldiphosphoundecaprenol N-acetyl-beta-D-mannosaminyltransferase [EC:2.4.1.187]
COO91_00402	1.14072	2.40646	17.6143	0.000606355	0.00398978	17	19	13	47	55	77	none	putative protein YjbI%2C containings pentapeptide repeats
COO91_02917	1.14032	2.48355	14.348	0.0014704	0.0080872	21	19	12	39	79	73	none	Mannosyltransferase related to Gpi18
COO91_03628	1.13791	2.60314	23.9961	0.00013579	0.00119885	16	25	20	65	80	77	none	hypothetical protein
COO91_00160	1.13709	3.81105	33.1369	2.3318e-05	0.000287465	71	81	47	216	255	248	none	Winged helix-turn-helix DNA-binding domain
COO91_10938	1.13692	1.42256	8.66591	0.00908288	0.0346539	10	13	7	34	41	34	none	Phosphoenolpyruvate synthase / Pyruvate phosphate dikinase
COO91_06408	1.13659	3.13044	16.5696	0.000796711	0.00497899	30	23	21	70	93	107	none	hypothetical protein
COO91_03845	1.13498	4.98164	27.6492	7.75897e-05	0.000754506	121	164	131	434	552	522	none	putative secreted protein
COO91_00710	1.13164	5.1951	25.7193	0.000108033	0.000986892	59	68	74	218	265	246	E2.4.1.187	N-acetylglucosaminyldiphosphoundecaprenol N-acetyl-beta-D-mannosaminyltransferase [EC:2.4.1.187]
COO91_01124	1.13025	3.48927	20.2863	0.000313489	0.00236225	22	19	15	66	58	78	none	hypothetical protein
COO91_07225	1.12471	3.09085	19.9373	0.000340704	0.00251211	42	41	39	122	174	145	none	putative PurR-regulated permease PerM
COO91_04252	1.12418	2.0323	15.9403	0.000943363	0.00570126	19	24	15	67	66	75	none	hypothetical protein
COO91_07110	1.12279	2.46309	14.2486	0.00151297	0.00827508	31	26	31	101	123	93	none	hypothetical protein
COO91_11210	1.12254	3.06062	24.5518	0.000120631	0.00108538	18	26	15	62	81	69	none	Protein of unknown function DUF2811
COO91_06341	1.12202	5.12201	16.8505	0.00126435	0.00714638	190	188	185	585	735	708	none	Nucleoside-diphosphate-sugar epimerase
COO91_02530	1.1183	3.32043	36.4571	1.33425e-05	0.000182295	56	68	54	176	230	233	none	2%2C4-dienoyl-CoA reductase or related NADH-dependent reductase
COO91_01662	1.11756	1.25496	10.6069	0.00464599	0.0203513	15	10	5	29	48	31	none	hypothetical protein
COO91_01230	1.11738	3.2078	28.6699	5.26734e-05	0.000552458	44	40	26	119	145	129	none	hypothetical protein
COO91_01125	1.11717	3.78635	36.0132	1.43463e-05	0.000192661	26	29	27	98	93	102	none	hypothetical protein
COO91_08078	1.11687	6.86066	62.7438	4.19398e-07	1.16999e-05	964	950	750	2449	3400	3717	none	hypothetical protein
COO91_08789	1.11496	2.09763	14.399	0.00144911	0.00800001	22	19	19	57	91	68	mazF	mRNA interferase MazF [EC:3.1.-.-]
COO91_03675	1.1148	4.2043	22.5251	0.000193612	0.0016108	68	60	85	233	236	296	none	Lipopolysaccharide biosynthesis protein%2C LPS:glycosyltransferase
COO91_00644	1.11227	2.75548	19.7094	0.000359892	0.00262321	35	33	22	82	96	144	none	Transposase%2C IS5 family
COO91_03847	1.11109	6.23833	49.3212	2.05754e-06	3.99835e-05	400	409	342	1036	1823	1269	none	Protein of unknown function DUF4360
COO91_00045	1.10868	4.79848	30.3981	3.80685e-05	0.000423924	129	84	112	361	382	417	parA	chromosome partitioning protein
COO91_08521	1.10862	1.44828	14.7717	0.00130349	0.00732935	17	16	9	40	58	52	none	hypothetical protein
COO91_01126	1.10827	6.22623	93.9317	2.45878e-08	1.22082e-06	150	168	143	492	581	566	none	Molecular chaperone DnaK
COO91_06804	1.10796	1.83275	11.7673	0.00319339	0.0150766	24	18	14	64	70	65	none	Phosphodiester glycosidase
COO91_05922	1.10779	6.44986	68.4502	2.31318e-07	7.1948e-06	265	203	241	705	905	928	none	Amino acid transporter
COO91_07566	1.10761	5.42115	49.7728	1.94031e-06	3.82548e-05	159	164	159	421	691	617	E4.2.1.46	dTDP-glucose 4,6-dehydratase [EC:4.2.1.46]
COO91_02957	1.10492	3.55246	26.7153	7.72609e-05	0.000753398	51	39	55	158	172	187	none	Lysophospholipase%2C alpha-beta hydrolase superfamily
COO91_00137	1.10296	3.97975	31.6362	3.03946e-05	0.000354899	73	86	56	214	255	292	none	DNA-binding transcriptional regulator%2C LysR family
COO91_08012	1.10254	1.15675	8.08528	0.0112332	0.0411328	12	16	8	54	32	40	none	hypothetical protein
COO91_09719	1.10244	4.82755	46.2147	3.11584e-06	5.51076e-05	69	56	64	198	235	239	none	Hemolysin activation/secretion protein
COO91_03312	1.10232	2.1116	11.8245	0.00313636	0.0148504	14	11	13	44	43	48	none	putative ATPase%2C archaeal AAA+ ATPase superfamily
COO91_10569	1.10046	1.54746	7.81558	0.0124242	0.0446185	9	9	8	33	21	38	none	hypothetical protein
COO91_04732	1.09822	1.00687	8.4494	0.009825	0.0370649	4	10	12	23	34	36	none	hypothetical protein
COO91_03729	1.09723	2.22011	8.47847	0.00998044	0.0374996	10	31	15	51	76	71	none	Ribosomal protein S18 acetylase RimI and related acetyltransferases
COO91_02152	1.09627	2.95624	23.7123	0.000144347	0.00126103	36	40	40	109	167	136	none	SAM-dependent methyltransferase
COO91_09489	1.09378	2.03052	9.00667	0.00811203	0.0317787	19	21	20	72	69	70	none	hypothetical protein
COO91_02017	1.09294	2.07765	17.4065	0.000639731	0.00415633	9	18	14	40	53	52	none	hypothetical protein
COO91_06810	1.09216	2.52646	9.87278	0.005948	0.0248288	10	30	13	54	61	71	none	DNA-binding response regulator%2C OmpR family%2C containings REC and winged-helix
COO91_04263	1.09161	1.41616	12.3909	0.0026293	0.0129656	18	16	12	49	58	55	none	hypothetical protein
COO91_00355	1.09093	2.64056	11.9863	0.00305548	0.0145424	41	26	39	118	122	134	none	Spore coat polysaccharide biosynthesis protein SpsF%2C cytidylyltransferase family
COO91_07189	1.08889	5.22182	46.3376	3.06389e-06	5.44557e-05	281	258	210	782	980	864	none	Alpha-2-macroglobulin%2C N-terminal 2
COO91_04177	1.08856	5.05307	44.9355	3.71914e-06	6.29984e-05	116	114	123	386	404	450	none	Forkhead associated
COO91_08492	1.08825	0.977223	8.02934	0.0114692	0.0417849	4	8	5	19	22	19	none	Site-specific recombinase XerD
COO91_09894	1.08793	2.60494	8.2866	0.0109322	0.0402211	20	21	15	74	53	68	none	hypothetical protein
COO91_05841	1.08789	5.25718	32.6431	2.57676e-05	0.000311629	167	143	129	474	527	537	none	putative oxidoreductase
COO91_10235	1.08733	4.30682	36.1247	1.40863e-05	0.000190113	149	152	150	400	534	659	none	NADP-dependent 3-hydroxy acid dehydrogenase YdfG
COO91_07887	1.08677	2.63614	12.0026	0.00302587	0.0144555	41	26	39	117	122	134	none	Spore coat polysaccharide biosynthesis protein SpsF%2C cytidylyltransferase family
COO91_00186	1.08595	2.52127	12.7667	0.00234383	0.0118939	31	17	27	110	86	65	none	putative transposase YdaD
COO91_00026	1.08455	3.32914	24.2625	0.000128272	0.00113711	45	42	42	130	164	159	none	Helix-turn-helix domain
COO91_00087	1.08455	3.32914	24.2625	0.000128272	0.00113711	45	42	42	130	164	159	none	Helix-turn-helix domain
COO91_06520	1.08337	3.64893	16.0745	0.001016	0.00604571	73	76	57	172	313	240	psbN	PsbN protein
COO91_01158	1.08336	1.49067	12.7758	0.00233742	0.0118669	12	16	8	36	37	53	parA	chromosome partitioning protein
COO91_10117	1.08305	2.07692	11.8645	0.00309711	0.0146838	21	14	13	44	72	53	none	hypothetical protein
COO91_06789	1.07999	6.66369	101.488	1.3976e-08	7.97895e-07	620	659	529	1855	2239	2205	none	GAF domain-like
COO91_02535	1.07417	5.84433	32.7875	2.8812e-05	0.000338611	249	228	163	641	768	810	PRK	phosphoribulokinase [EC:2.7.1.19]
COO91_10091	1.07262	3.80921	15.3015	0.00127571	0.00719692	57	72	46	189	252	164	none	hypothetical protein
COO91_10884	1.07079	1.84012	9.28988	0.00727525	0.0291441	9	17	8	33	33	52	none	DNA-directed RNA polymerase%2C sigma subunit
COO91_07044	1.07046	1.74262	10.1023	0.00550024	0.023283	24	16	25	58	103	67	none	hypothetical protein
COO91_01700	1.06894	5.35562	62.34	4.38146e-07	1.20674e-05	179	197	204	564	732	722	pknE	protein serine-threonine kinase
COO91_06990	1.06785	5.18102	37.0869	1.20506e-05	0.000168304	194	215	191	608	792	678	none	hypothetical protein
COO91_06823	1.06769	5.58692	74.766	1.25281e-07	4.3324e-06	328	286	262	857	1163	1018	none	hypothetical protein
COO91_04794	1.06687	2.29769	10.4552	0.00488598	0.0211713	21	21	9	62	52	61	none	Nucleotide-diphospho-sugar transferases
COO91_07249	1.06466	3.80495	47.3198	2.68189e-06	4.91181e-05	57	64	53	167	220	215	none	Endonuclease%2C Uma2 family
COO91_07397	1.06413	4.04955	34.9466	1.7122e-05	0.000223019	89	108	108	270	440	351	none	Ubiqui/menaqui biosynthesis C-methylase UbiE
COO91_02234	1.06405	5.10226	62.2714	4.41425e-07	1.20962e-05	155	152	150	443	574	566	none	Periplasmic component of the Tol biopolymer transport system
COO91_06411	1.06369	4.86694	51.5782	1.54077e-06	3.19413e-05	107	118	119	351	461	378	none	Glycosyltransferase involved in cell wall bisynthesis
COO91_11159	1.0635	2.28873	10.7524	0.00442825	0.0195559	17	11	19	52	62	49	none	Peroxiredoxin
COO91_05716	1.06265	1.9459	12.1306	0.00284991	0.0137896	20	9	19	48	65	54	none	Molybdopterin-binding protein
COO91_04712	1.06193	3.58539	18.3559	0.000502211	0.00342313	67	59	37	153	241	168	none	hypothetical protein
COO91_04133	1.06168	3.17581	24.384	0.000124999	0.00111632	22	30	28	94	98	83	none	hypothetical protein
COO91_09594	1.06112	1.73031	8.47649	0.00972848	0.0367636	9	8	17	37	33	48	none	Flagellar biosynthesis GTPase FlhF
COO91_04193	1.05887	5.6357	28.691	6.52927e-05	0.00064897	220	265	159	602	898	710	pstS	phosphate transport system substrate-binding protein
COO91_07199	1.05816	2.14264	18.4614	0.000489093	0.00335484	20	20	18	77	64	57	none	mRNA-degrading endonuclease RelE%2C toxin component of the RelBE toxin-antitoxin system
COO91_04716	1.05766	5.76751	66.5763	2.79953e-07	8.44071e-06	290	280	232	733	1047	984	none	ABC-type Na+ efflux pump%2C permease component
COO91_10375	1.05581	2.88798	18.285	0.000511243	0.00347594	51	34	27	124	127	132	none	Large exoprotein involved in heme utilization or adhesion
COO91_04267	1.05556	8.01156	92.6862	2.70876e-08	1.32668e-06	1441	1322	1221	4199	4468	4981	none	Multidrug efflux pump subunit AcrA
COO91_07854	1.05546	1.3426	8.61	0.00926826	0.0352493	9	12	11	24	36	51	COQ4	ubiquinone biosynthesis protein COQ4
COO91_09725	1.05465	6.39917	61.9751	4.55899e-07	1.23676e-05	367	373	360	1188	1241	1337	none	ATPase involved in DNA repair
COO91_06735	1.05215	7.07422	67.6324	2.51276e-07	7.68308e-06	684	675	647	2065	2437	2368	gmd	GDPmannose 4,6-dehydratase [EC:4.2.1.47]
COO91_01631	1.05012	3.57075	33.5974	2.15323e-05	0.000270065	59	82	59	212	238	231	none	hypothetical protein
COO91_09632	1.04803	4.45178	44.8651	3.75593e-06	6.35222e-05	154	135	169	456	534	582	none	Chromosome segregation ATPase-like
COO91_08868	1.04757	2.61697	16.2559	0.000866326	0.00534308	18	41	30	68	120	118	none	Patatin-like phospholipase/acyl hydrolase
COO91_07538	1.04541	3.26967	25.6089	9.67426e-05	0.000904267	65	37	48	145	194	175	hlpA	similar to hemolytic protein HlpA
COO91_01246	1.04482	3.47568	20.3095	0.00031177	0.00236225	56	39	53	113	206	192	none	WD40 repeat
COO91_03715	1.04386	5.35688	48.6037	2.26045e-06	4.29247e-05	166	221	164	608	619	636	spoIID	stage II sporulation protein D
COO91_00193	1.04378	1.8514	14.5739	0.00137862	0.00766812	14	17	16	42	58	61	none	hypothetical protein
COO91_00616	1.042	1.19718	12.4772	0.00256046	0.0127072	11	9	9	30	31	38	higA	proteic killer suppression protein
COO91_07386	1.04128	1.66643	11.2244	0.00379736	0.0172918	21	11	13	40	50	64	lipB	lipoyl(octanoyl) transferase [EC:2.3.1.181]
COO91_10829	1.04077	3.06089	17.5218	0.000620956	0.00406854	27	18	24	84	83	67	none	TPR repeat
COO91_10259	1.04025	1.53297	10.5834	0.00468232	0.0204939	8	13	10	26	32	48	none	Cellulose synthase operon C%2C C-terminal
COO91_01295	1.04005	5.4026	61.0198	5.06299e-07	1.33663e-05	152	167	150	503	530	555	none	ATPase involved in DNA repair
COO91_08147	1.03971	3.41088	21.1996	0.000253116	0.00200713	36	32	36	105	120	129	none	IS4 transposase
COO91_02036	1.03954	0.949583	7.63927	0.0132801	0.0470927	9	7	7	30	25	23	wbpO	UDP-N-acetyl-D-galactosamine dehydrogenase [EC:1.1.1.-]
COO91_00654	1.03717	3.79421	21.5507	0.00023347	0.00188307	35	68	57	169	174	198	none	Chemotaxis protein histidine kinase CheA
COO91_06406	1.03514	3.65101	29.4697	4.5253e-05	0.000488841	38	61	67	173	204	186	gmd	GDPmannose 4,6-dehydratase [EC:4.2.1.47]
COO91_09330	1.03472	2.78451	20.7066	0.000283907	0.00220287	43	29	29	111	107	123	-	AraC family transcriptional regulator
COO91_10620	1.03438	4.23571	39.4577	8.30134e-06	0.000121588	77	69	67	223	256	241	none	Tetratricopeptide
COO91_07751	1.03341	2.23392	16.937	0.000723016	0.00458461	19	17	13	48	68	50	none	Large exoprotein involved in heme utilization or adhesion
COO91_10660	1.03331	2.83019	14.6218	0.00135999	0.00759183	32	27	35	70	141	111	none	hypothetical protein
COO91_01068	1.03269	3.51589	16.9806	0.000714778	0.00455041	33	44	35	105	136	138	none	Hemolysin activation/secretion protein
COO91_06992	1.03129	3.86653	15.8444	0.00108422	0.006347	100	91	59	257	339	244	none	putative protein%2C containings caspase domain
COO91_09609	1.03009	1.81954	16.2896	0.00085853	0.00531317	21	19	12	55	63	57	none	hypothetical protein
COO91_07679	1.02852	1.3768	8.26834	0.0104986	0.03897	8	8	15	35	32	38	parA	chromosome partitioning protein
COO91_01065	1.02532	3.39223	21.2074	0.000252659	0.00200497	35	49	41	99	154	170	none	LysM repeat
COO91_06113	1.02491	2.60461	21.2145	0.000252246	0.00200316	29	20	25	80	91	78	none	Two-component response regulator%2C PleD family
COO91_07379	1.0246	3.15205	14.7488	0.00131195	0.00737307	27	37	26	79	100	124	none	hypothetical protein
COO91_08132	1.02339	2.3852	12.931	0.00223014	0.0114566	44	45	41	86	183	173	none	IS4 transposase
COO91_08710	1.02186	1.97976	12.7102	0.00238444	0.0120267	15	22	16	40	62	77	none	Endonuclease%2C Uma2 family
COO91_02433	1.02102	8.97152	54.6478	1.05566e-06	2.39047e-05	1703	1780	1680	5064	6049	6206	none	Chromosome partitioning ATPase%2C Mrp family%2C containings Fe-S cluster
COO91_01512	1.02051	4.42365	30.2017	3.94752e-05	0.000437787	84	101	72	213	347	304	cpcC	phycobilisome rod linker polypeptide Lr, phycocyanin-associated
COO91_06798	1.02005	2.59188	13.0738	0.00213641	0.0110379	39	28	14	85	106	79	none	mRNA-degrading endonuclease
COO91_03327	1.01929	3.77272	20.4015	0.000305051	0.00232823	53	50	44	132	208	154	none	hypothetical protein
COO91_07919	1.0189	1.37568	8.40523	0.00998466	0.0374996	7	10	10	37	27	26	none	hypothetical protein
COO91_03572	1.01648	1.96897	15.2219	0.00114908	0.00661926	13	17	17	52	51	54	none	putative site-specific integrase-resolvase
COO91_08514	1.01494	1.0861	9.15229	0.00763592	0.0303865	10	6	9	26	34	24	E2.2.1.2	transaldolase [EC:2.2.1.2]
COO91_09586	1.01471	2.17864	16.2752	0.000861869	0.00532166	26	21	20	47	88	91	none	Type IV secretory pathway%2C VirD4 component%2C TraG/TraD family ATPase
COO91_10222	1.01269	2.98949	18.9779	0.000430184	0.00302366	54	70	71	161	237	257	none	putative arabinose efflux permease%2C MFS family
COO91_11099	1.01214	4.08916	25.7846	9.33115e-05	0.000877501	84	59	54	205	242	208	none	ATPase involved in DNA repair
COO91_03154	1.01192	4.07727	15.7862	0.00104311	0.00616973	63	48	57	175	186	199	relE	mRNA interferase RelE/StbE
COO91_10429	1.01086	5.56104	56.0103	8.97261e-07	2.09761e-05	225	221	210	664	779	739	none	ATPase involved in DNA repair
COO91_09814	1.01073	2.42271	11.8927	0.00306983	0.0145864	21	10	22	60	63	54	none	hypothetical protein
COO91_08040	1.00965	1.71178	7.90843	0.0119987	0.0433782	20	15	16	53	74	43	none	hypothetical protein
COO91_04080	1.00631	6.19384	36.4268	1.39271e-05	0.000188669	375	422	381	927	1639	1375	none	hypothetical protein
COO91_05849	1.00608	4.30621	46.7209	2.90802e-06	5.22863e-05	93	96	84	248	357	303	none	hypothetical protein
COO91_05591	1.00607	3.83042	12.1278	0.00285231	0.0137949	15	23	17	60	61	61	hupB	hydrogenase expression/formation protein
COO91_10241	1.00429	5.09228	49.7524	1.94542e-06	3.82859e-05	277	220	216	653	867	850	none	LysM repeat
COO91_05275	1.00428	1.32758	11.0311	0.00404258	0.018179	11	13	11	27	48	42	none	hypothetical protein
COO91_11122	1.00258	4.84287	26.0001	8.92877e-05	0.00085	105	117	96	310	372	369	none	Transposase%2C TnpA family
COO91_10898	1.00241	3.97923	25.5836	9.72492e-05	0.000906654	63	88	48	186	267	203	none	Fatty acid desaturase
COO91_06403	1.00234	3.97577	10.0223	0.0069658	0.0281125	59	50	48	141	160	220	none	Glycosyltransferase involved in cell wall bisynthesis
COO91_06855	1.00231	4.15704	24.6097	0.000119162	0.00107356	56	76	72	196	236	244	none	hypothetical protein
COO91_04273	1.0007	1.2873	8.73221	0.00886848	0.0339796	15	5	13	32	35	43	cobH-cbiC	precorrin-8X/cobalt-precorrin-8 methylmutase [EC:5.4.99.61 5.4.99.60]
COO91_07665	0.999943	3.55621	28.2596	5.70018e-05	0.000583972	58	69	38	146	201	197	none	Glutamate-1-semialdehyde aminotransferase
COO91_05352	0.999663	4.2175	25.9306	9.05629e-05	0.000858365	84	70	81	218	296	266	none	hypothetical protein
COO91_10702	0.997211	2.24227	13.0257	0.00216749	0.0111772	15	25	25	72	72	70	none	Peroxiredoxin
COO91_09633	0.996528	3.22436	20.1011	0.000327613	0.00244557	80	59	52	172	241	218	none	hypothetical protein
COO91_02534	0.99541	2.72216	14.8422	0.00127782	0.00720374	36	20	32	73	133	87	radC	DNA repair protein RadC
COO91_02391	0.994459	6.1962	22.8836	0.000291639	0.00224937	550	681	482	1577	2437	1615	none	Small-conductance mechanosensitive channel
COO91_00481	0.993552	1.00173	8.27324	0.0104796	0.0389264	8	14	8	27	42	30	none	4-amino-4-deoxy-L-arabinose transferase or related glycosyltransferase of PMT family
COO91_06404	0.993326	4.09189	17.5137	0.000622727	0.00407521	64	57	52	167	196	206	none	Ubiqui/menaqui biosynthesis C-methylase UbiE
COO91_08313	0.991814	5.74539	29.2596	5.29021e-05	0.000553784	237	464	274	948	1265	967	none	Extracellular
COO91_01423	0.984923	3.82306	19.24	0.000403364	0.00287616	56	75	66	181	221	243	none	hypothetical protein
COO91_03838	0.983871	2.85648	19.8008	0.000352054	0.00257649	28	27	37	72	122	110	none	hypothetical protein
COO91_07543	0.983491	2.79177	9.46856	0.00702892	0.0282829	46	29	21	102	102	108	none	Glycosyltransferase%2C GT2 family
COO91_10472	0.982196	4.2148	26.3257	8.35691e-05	0.000802696	74	85	64	205	241	281	none	hypothetical protein
COO91_10261	0.981648	4.6315	34.2188	1.93602e-05	0.000247409	131	108	92	304	450	327	none	Ca2+-binding protein%2C RTX toxin-related
COO91_09722	0.981264	4.67169	15.3739	0.00132494	0.00743451	84	63	84	245	272	237	none	Tetratricopeptide
COO91_10242	0.979655	6.44263	56.4151	8.55464e-07	2.0306e-05	671	549	519	1502	1913	2271	none	Tetratricopeptide
COO91_04591	0.979512	5.68211	65.2647	3.20791e-07	9.46114e-06	265	250	218	730	874	778	none	DNA-binding response regulator%2C OmpR family%2C containings REC and winged-helix
COO91_07382	0.979502	4.1345	29.3637	4.61658e-05	0.000496225	82	71	60	186	307	203	none	Ca2+-binding protein%2C RTX toxin-related
COO91_00576	0.97899	3.55558	14.4666	0.00142922	0.00790491	38	73	45	132	198	178	ABC-2.P	ABC-2 type transport system permease protein
COO91_09653	0.978484	2.25316	16.0005	0.000928096	0.00562785	21	30	17	63	83	75	none	hypothetical protein
COO91_06484	0.977885	1.63696	8.12263	0.0110787	0.0406771	18	13	7	43	37	43	none	hypothetical protein
COO91_02523	0.977223	3.06846	20.5837	0.000292217	0.00225121	36	50	41	111	147	156	none	hypothetical protein
COO91_08458	0.974353	2.11439	11.0108	0.0040694	0.0182768	13	11	20	51	41	51	none	Formylglycine-generating enzyme%2C required for sulfatase activity%2C containings SUMF1/FGE domain
COO91_09718	0.973924	5.57158	35.3327	1.6053e-05	0.000210871	113	139	166	388	505	471	none	Large exoprotein involved in heme utilization or adhesion
COO91_04253	0.973866	3.68255	20.5532	0.000294321	0.00226259	80	71	60	202	250	232	-	putative membrane protein
COO91_09051	0.972841	5.29077	65.6246	3.08959e-07	9.17436e-06	163	161	158	437	541	589	pstC	phosphate transport system permease protein
COO91_01424	0.972244	3.88969	32.7756	2.48354e-05	0.000302416	79	61	65	178	270	220	none	Endonuclease%2C Uma2 family
COO91_07997	0.971114	0.922216	7.76243	0.0126755	0.0453852	7	9	11	26	32	30	none	Protein of unknown function DUF3775
COO91_05621	0.970005	2.07911	12.2262	0.00276652	0.0134765	16	21	20	53	66	66	glk	glucokinase [EC:2.7.1.2]
COO91_08120	0.969386	5.47883	53.3262	1.23973e-06	2.71088e-05	372	342	367	980	1119	1411	none	ABC-type bacteriocin/lantibiotic exporters%2C containing an N-terminal double-glycine peptidase domain
COO91_08495	0.968907	2.52577	8.98116	0.00822453	0.032138	31	42	24	87	109	117	none	hypothetical protein
COO91_06555	0.967206	2.50711	13.9914	0.00162965	0.00875835	27	27	23	70	75	104	none	hypothetical protein
COO91_02270	0.966227	5.58165	39.3246	8.47317e-06	0.000123603	161	197	151	455	579	608	none	Tfp pilus assembly protein FimV
COO91_07567	0.963277	4.84158	24.9258	0.000111497	0.001015	136	133	129	372	492	420	none	HAD-superfamily phosphatase%2C YqeG-like
COO91_00434	0.962483	1.95223	10.0078	0.00567923	0.0238896	24	12	10	37	66	46	none	Ca2+-binding protein%2C RTX toxin-related
COO91_07667	0.961614	2.61406	20.0232	0.000333766	0.00247208	29	27	21	70	94	84	none	Glutamate-1-semialdehyde aminotransferase
COO91_08293	0.960539	3.36716	11.598	0.00362677	0.0167262	47	102	52	204	254	182	none	hypothetical protein
COO91_01808	0.960519	6.59239	40.2294	7.37847e-06	0.000110769	518	569	474	1326	1965	1741	none	hypothetical protein
COO91_01807	0.959605	8.20232	30.3849	5.75334e-05	0.000586938	1477	1698	1230	3807	5184	5150	none	hypothetical protein
COO91_09209	0.95779	4.20735	9.68646	0.00803016	0.0315663	93	94	81	227	353	283	none	hypothetical protein
COO91_01368	0.956762	2.49838	13.8289	0.00170857	0.00913261	40	23	20	70	90	107	none	MFS family permease
COO91_09040	0.955651	3.62821	15.6863	0.00101096	0.00602237	46	51	32	122	156	134	none	Endonuclease%2C Uma2 family
COO91_10773	0.955213	1.62704	11.4974	0.00347891	0.0161682	13	12	18	37	58	44	none	Ca2+-binding protein%2C RTX toxin-related
COO91_01215	0.954457	1.63528	9.6841	0.00634398	0.0260894	13	24	9	49	40	57	none	UDP-N-acetylglucosamine:LPS N-acetylglucosamine transferase
COO91_02432	0.952804	4.94005	34.8352	1.7445e-05	0.000226681	107	114	128	330	379	410	none	hypothetical protein
COO91_09462	0.95072	2.62117	12.164	0.00282044	0.0136654	20	22	28	73	100	51	none	Acyl-CoA dehydrogenase related to the alkylation response protein AidB
COO91_07565	0.950358	4.0559	20.0346	0.00033286	0.00246772	75	71	66	161	291	230	none	putative membrane protein
COO91_04682	0.949345	2.11103	11.7338	0.00322736	0.0152081	27	28	27	87	98	76	none	Phytanoyl-CoA dioxygenase
COO91_01184	0.949012	5.3015	29.8809	4.1899e-05	0.000459023	147	180	156	456	553	530	none	Transposase%2C TnpA family
COO91_03455	0.949012	5.3015	29.8809	4.1899e-05	0.000459023	147	180	156	456	553	530	none	Transposase%2C TnpA family
COO91_08145	0.949012	5.3015	29.8809	4.1899e-05	0.000459023	147	180	156	456	553	530	none	Transposase%2C TnpA family
COO91_08429	0.949012	5.3015	29.8809	4.1899e-05	0.000459023	147	180	156	456	553	530	none	Transposase%2C TnpA family
COO91_07834	0.948104	5.30126	29.8219	4.23629e-05	0.000461769	147	180	156	456	553	529	none	Transposase%2C TnpA family
COO91_01892	0.947916	4.55154	28.3338	5.61897e-05	0.000579777	106	84	94	248	287	374	none	Ca2+-binding protein%2C RTX toxin-related
COO91_00296	0.947673	2.6029	14.7254	0.00132066	0.00741435	28	34	23	84	106	80	none	putative type IV restriction endonuclease
COO91_09157	0.947503	5.40246	26.4158	8.21306e-05	0.000790909	157	190	166	484	585	564	none	Transposase%2C TnpA family
COO91_11110	0.947035	4.29505	42.6957	5.11729e-06	8.12163e-05	112	103	90	278	375	319	none	hypothetical protein
COO91_01176	0.946841	5.30112	29.7006	4.33336e-05	0.000469983	147	180	156	453	554	530	none	Transposase%2C TnpA family
COO91_10167	0.946422	3.87223	18.1798	0.000524987	0.00355599	60	79	69	186	229	248	none	hypothetical protein
COO91_07906	0.945418	1.8409	9.03513	0.00795901	0.0313837	11	14	17	42	44	48	none	hypothetical protein
COO91_01138	0.944869	4.90762	31.0177	3.39869e-05	0.000388053	154	115	133	340	496	451	none	DNA/RNA endonuclease G%2C NUC1
COO91_00820	0.943157	2.47316	15.3845	0.00109842	0.00641278	18	24	26	70	73	73	none	hypothetical protein
COO91_07713	0.942988	1.54449	10.0212	0.0056535	0.0238107	9	11	11	39	26	33	none	Lysophospholipase%2C alpha-beta hydrolase superfamily
COO91_01079	0.942915	3.0602	16.0224	0.000922598	0.00559765	35	34	35	105	110	115	none	Cell division ATPase FtsA
COO91_06818	0.942604	2.40547	14.4766	0.00141732	0.00785917	30	19	26	63	98	79	none	DNA-binding transcriptional regulator%2C IscR family
COO91_10236	0.941622	4.13052	22.1116	0.000205528	0.00168898	172	144	150	406	549	530	none	Acyl carrier protein
COO91_01462	0.941067	4.37038	32.3143	2.6936e-05	0.00032145	91	95	86	250	297	316	none	Superfamily II DNA or RNA helicase
COO91_06414	0.938145	4.68133	20.1456	0.000324449	0.00243033	82	113	95	279	323	314	ABC-2.LPSE.A	lipopolysaccharide transport system ATP-binding protein
COO91_06677	0.937937	6.41068	28.9123	5.64265e-05	0.00058002	286	279	306	855	925	978	none	Myosin heavy chain
COO91_01513	0.937825	5.71689	15.8939	0.00138857	0.00771157	179	170	118	458	521	490	cpcC_3	phycocyanin-associated rod linker protein
COO91_04539	0.937428	2.11273	8.20649	0.0107405	0.03961	19	29	19	41	98	75	none	DNA uptake protein ComE and related DNA-binding proteins
COO91_00037	0.935577	2.93231	14.0363	0.00160855	0.00866215	33	40	38	96	131	125	none	Winged helix-turn helix domain
COO91_11101	0.933111	3.66347	19.4578	0.000382505	0.00274916	42	80	41	150	186	175	recQ	ATP-dependent DNA helicase RecQ [EC:3.6.4.12]
COO91_01809	0.933098	2.91002	15.2061	0.00115414	0.00664135	45	39	19	89	111	124	none	hypothetical protein
COO91_00176	0.932202	3.66962	20.94	0.000268832	0.00211317	66	70	54	143	239	220	none	putative membrane protein
COO91_00343	0.932112	2.72553	10.0778	0.00554608	0.0234129	10	39	26	69	80	87	none	cAMP-binding domain of CRP or a regulatory subunit of cAMP-dependent protein kinases
COO91_08470	0.932073	4.24914	20.7273	0.000282527	0.00219531	46	62	42	117	179	178	ycaJ	putative ATPase
COO91_00426	0.931883	3.92747	16.6691	0.000775938	0.00487632	58	80	50	183	213	193	none	Methyl-accepting chemotaxis protein
COO91_05619	0.930426	3.31566	16.3109	0.000853648	0.00528598	55	52	35	115	192	141	none	Mut7-C RNAse domain
COO91_08494	0.929305	5.51958	63.076	4.04645e-07	1.13763e-05	220	244	205	687	674	731	none	ATPase involved in DNA repair
COO91_00821	0.928277	6.52229	60.8325	5.16897e-07	1.35798e-05	347	323	327	888	1103	1152	none	Superfamily II DNA or RNA helicase
COO91_09620	0.927423	6.13941	15.0331	0.00192802	0.0101109	346	356	251	949	967	1055	none	Tetratricopeptide
COO91_00270	0.926299	2.66947	16.8289	0.000743872	0.00470033	31	36	21	86	108	81	none	RNA:NAD 2'-phosphotransferase
COO91_00110	0.925662	2.48773	8.89172	0.00837574	0.0325766	33	29	15	61	104	77	none	phytochelatin synthase
COO91_01151	0.924713	4.33619	29.3149	4.65922e-05	0.000499816	123	147	102	336	422	405	none	hypothetical protein
COO91_09838	0.924623	5.39795	27.8313	6.19499e-05	0.000621451	159	192	168	483	583	560	none	Transposase%2C TnpA family
COO91_07123	0.923717	5.39302	13.2697	0.00291863	0.0140343	284	219	269	765	828	829	penP	beta-lactamase class A [EC:3.5.2.6]
COO91_04776	0.922602	5.4044	39.5033	8.24339e-06	0.000121067	166	188	177	450	627	592	none	NAD/NADP transhydrogenase beta subunit
COO91_10443	0.922434	2.20397	9.56581	0.00660847	0.0269315	18	16	23	47	68	65	none	ATP-dependent exoDNAse
COO91_03268	0.919064	3.44343	18.9552	0.000432601	0.0030386	62	45	31	136	157	136	xisH	fdxN element excision controlling factor protein
COO91_03730	0.916983	2.94628	19.8481	0.000348068	0.0025577	50	49	28	112	146	137	none	hypothetical protein
COO91_04799	0.916692	1.60478	11.7197	0.0032418	0.0152584	16	19	18	45	58	63	none	Nucleoid-associated protein YgaU%2C containings BON and LysM domains
COO91_08503	0.916569	2.90994	16.1692	0.000886767	0.00543509	28	33	36	93	117	93	none	ATPase involved in DNA repair
COO91_04268	0.915749	4.64337	51.8274	1.49325e-06	3.13235e-05	139	152	119	381	436	457	none	Multidrug efflux pump subunit AcrB
COO91_08314	0.915572	5.13046	20.7186	0.000307231	0.00234188	163	229	199	630	635	564	none	LysM repeat
COO91_06670	0.914946	1.42903	8.63587	0.00918198	0.034995	8	11	10	23	37	31	none	hypothetical protein
COO91_04264	0.913805	3.82932	19.0491	0.000422709	0.00298266	75	57	80	205	234	223	wcaI	colanic acid biosynthesis glycosyl transferase WcaI
COO91_00393	0.913633	5.44574	48.0691	2.42621e-06	4.55136e-05	211	255	185	602	745	671	wecB	UDP-N-acetylglucosamine 2-epimerase (non-hydrolysing) [EC:5.1.3.14]
COO91_11178	0.913353	4.19232	23.2698	0.000158924	0.00136849	86	78	89	245	291	252	none	Tetratricopeptide
COO91_10638	0.913031	2.23083	15.3414	0.00111161	0.0064793	24	27	20	71	67	82	none	Type IV secretory pathway%2C VirB4 component
COO91_09774	0.912573	1.91498	8.44861	0.00982781	0.0370649	25	22	17	40	86	75	none	hypothetical protein
COO91_00562	0.912168	3.30872	15.3033	0.0011234	0.00653041	34	32	28	79	101	113	none	Glutathione synthase/RimK-type ligase%2C ATP-grasp superfamily
COO91_06803	0.911212	2.5486	17.1123	0.000690568	0.00442146	25	21	28	67	83	81	none	hypothetical protein
COO91_03771	0.910151	2.34237	11.7668	0.00319389	0.0150766	20	21	13	54	56	57	none	Chromosome partitioning ATPase%2C Mrp family%2C containings Fe-S cluster
COO91_06644	0.909803	5.49829	34.1803	1.94873e-05	0.000248154	273	311	242	771	948	836	none	Cellulose biosynthesis protein BcsQ
COO91_04809	0.909612	4.49039	32.7077	2.5133e-05	0.000304977	94	85	76	204	326	265	cfa	cyclopropane-fatty-acyl-phospholipid synthase [EC:2.1.1.79]
COO91_09847	0.909554	2.88387	7.94793	0.0122832	0.0442293	35	36	36	94	120	119	none	hypothetical protein
COO91_06026	0.908722	5.9205	33.9038	2.04288e-05	0.000258407	331	320	297	878	1091	970	none	hypothetical protein
COO91_01850	0.907903	3.6638	20.3407	0.000309472	0.00235234	70	50	56	149	191	208	none	PIN domain nuclease%2C a component of toxin-antitoxin system
COO91_00209	0.90747	1.80141	8.94399	0.00822105	0.032136	14	19	22	51	55	65	none	DNA-binding response regulator%2C OmpR family%2C containings REC and winged-helix
COO91_06902	0.906185	3.39943	18.4912	0.000485463	0.00333749	48	41	61	130	170	168	none	Glycosyltransferase%2C GT2 family
COO91_07900	0.905808	4.61569	30.7405	3.57494e-05	0.000402655	121	89	101	289	325	350	parE1_3_4	toxin ParE1/3/4
COO91_06636	0.904413	4.86036	43.0796	4.8407e-06	7.79699e-05	208	210	226	558	780	663	wcaI	colanic acid biosynthesis glycosyl transferase WcaI
COO91_11209	0.903467	4.17889	28.4017	5.54587e-05	0.000574985	69	71	76	182	271	218	none	Superfamily II DNA or RNA helicase%2C SNF2 family
COO91_01806	0.903138	8.01001	25.7766	0.000139077	0.00121991	1245	1446	1104	3211	4244	4263	none	hypothetical protein
COO91_00429	0.901791	5.49768	41.0167	6.55359e-06	0.000100761	198	206	131	473	581	590	none	Amino acid transporter
COO91_01296	0.901759	4.06168	28.4133	5.53349e-05	0.000574252	55	79	70	189	204	236	none	putative ATPase%2C archaeal AAA+ ATPase superfamily
COO91_07208	0.901289	2.21039	9.92185	0.00584774	0.0244764	16	14	22	41	58	63	none	putative protein family Ycf20
COO91_09630	0.901222	1.58506	11.3085	0.00369583	0.0169651	33	29	18	66	98	83	none	hypothetical protein
COO91_11215	0.900702	1.80427	7.80076	0.0124937	0.0448531	23	21	16	36	81	70	none	hypothetical protein
COO91_10193	0.900666	5.35554	27.2974	6.88034e-05	0.000680117	157	190	167	470	569	545	none	Transposase%2C TnpA family
COO91_07994	0.900055	2.74453	13.3456	0.00196985	0.0102805	24	43	30	102	108	87	none	Peroxiredoxin
COO91_07202	0.899843	3.96201	22.7462	0.00017834	0.00150456	59	59	76	173	205	223	none	Calycin-like
COO91_09717	0.899258	4.93012	17.7317	0.000602999	0.00397737	94	72	74	204	274	264	none	O-Methyltransferase involved in polyketide biosynthesis
COO91_07125	0.898793	3.35243	15.4516	0.00107828	0.00632247	62	44	51	149	166	169	none	Permease of the drug/metabolite transporter
COO91_04675	0.898629	6.50171	17.2328	0.00103836	0.00615641	350	379	382	931	1433	1076	rpaC	hypothetical protein
COO91_03434	0.897884	2.76448	16.0251	0.000921935	0.00559676	29	40	23	94	94	93	none	Spore coat polysaccharide biosynthesis protein SpsF%2C cytidylyltransferase family
COO91_01933	0.897387	2.05124	8.23463	0.0106297	0.0393486	17	18	13	42	66	40	none	DNA-binding transcriptional regulator%2C AcrR family
COO91_06849	0.897243	2.36945	10.2333	0.00526272	0.0225688	17	27	27	55	88	77	none	ABC-type oligopeptide transport system%2C ATPase component
COO91_03814	0.897185	4.1011	14.4477	0.00150622	0.00825487	122	113	78	320	355	280	none	Cytochrome bd-type quinol oxidase%2C subunit 1
COO91_09186	0.895664	4.62861	29.4193	4.56838e-05	0.000491532	133	117	90	307	419	317	none	Prokaryotic membrane lipoprotein lipid attachment site profile
COO91_07886	0.895516	1.55484	10.5105	0.00479702	0.0208693	18	16	17	59	57	40	none	Spore coat polysaccharide biosynthesis protein SpsF%2C cytidylyltransferase family
COO91_05278	0.895298	6.2769	41.5852	6.0221e-06	9.36541e-05	705	821	655	1781	2280	2648	none	Cell wall-associated hydrolase%2C NlpC family
COO91_10319	0.894109	2.48474	8.55924	0.00950542	0.03605	41	38	44	111	147	121	none	Protein N-acetyltransferase%2C RimJ/RimL family
COO91_06530	0.893093	5.0762	20.5099	0.000305225	0.00232823	120	164	137	379	441	470	none	Regulator of sirC expression%2C containings transglutaminase-like and TPR domains
COO91_01515	0.892287	7.79564	16.0704	0.00152121	0.00830335	798	717	541	1860	2109	2310	cpcB	C-phycocyanin beta subunit
COO91_07069	0.89218	1.58868	10.5466	0.00473981	0.0206787	11	14	19	47	45	43	pip	proline iminopeptidase [EC:3.4.11.5]
COO91_03155	0.891512	4.462	14.353	0.00155941	0.00845222	112	55	73	215	259	264	topA	DNA topoisomerase I [EC:5.99.1.2]
COO91_02843	0.89017	3.86046	18.985	0.000429429	0.0030222	72	74	101	209	326	228	none	hypothetical protein
COO91_02380	0.888819	5.5233	26.9901	7.31312e-05	0.000719611	204	162	194	496	594	630	none	Parvulin-like peptidyl-prolyl isomerase
COO91_01811	0.8872	2.69101	11.7041	0.00325787	0.0153185	18	40	28	72	105	86	none	hypothetical protein
COO91_09775	0.886741	2.32773	10.491	0.0048282	0.0209745	32	30	21	58	105	92	none	hypothetical protein
COO91_04948	0.886645	2.45624	10.7266	0.00446614	0.0197151	33	28	15	63	91	78	none	putative PurR-regulated permease PerM
COO91_08498	0.885719	3.19727	20.5664	0.000293414	0.00225883	43	46	37	106	134	145	none	Tetratricopeptide
COO91_07378	0.884441	5.78706	38.8061	9.18172e-06	0.000132688	398	459	390	1229	1255	1298	none	hypothetical protein
COO91_10240	0.884433	5.88234	43.7296	4.4097e-06	7.24288e-05	478	405	439	1082	1334	1638	none	Extracellular
COO91_00413	0.883828	2.61391	12.4666	0.00256876	0.0127426	23	20	29	61	80	80	none	hypothetical protein
COO91_11214	0.883074	2.20862	9.80725	0.00608125	0.0252584	30	28	19	53	98	85	none	hypothetical protein
COO91_09937	0.882729	2.29482	8.0426	0.0114836	0.0418097	50	38	40	84	132	178	none	Ca2+-binding protein%2C RTX toxin-related
COO91_05107	0.88153	4.07492	11.4299	0.00378195	0.0172362	62	75	37	134	221	174	HMOX	heme oxygenase (biliverdin-producing) [EC:1.14.14.18]
COO91_03665	0.879305	6.34176	20.4911	0.00039821	0.00284315	338	333	288	843	1057	1013	none	hypothetical protein
COO91_08949	0.875191	3.88187	26.8231	7.56106e-05	0.000739304	66	73	73	189	203	251	none	hypothetical protein
COO91_02420	0.874517	3.37256	18.6608	0.000465336	0.0032184	51	43	44	129	158	131	none	hypothetical protein
COO91_06233	0.874463	4.37102	31.8817	2.90883e-05	0.000341488	121	114	114	292	413	356	none	hypothetical protein
COO91_08633	0.871205	3.12814	16.6105	0.000788098	0.00493656	37	34	37	106	111	109	none	CheY chemotaxis protein or a CheY-like REC
COO91_11190	0.871171	2.90131	12.8614	0.00227759	0.0116341	41	29	29	85	123	92	none	Cupin domain protein related to quercetin dioxygenase
COO91_04834	0.869969	3.96197	26.6285	7.86193e-05	0.00076184	111	98	110	275	358	334	none	Adenylate kinase or related kinase
COO91_09149	0.86985	4.34904	26.9609	7.35578e-05	0.000722495	125	123	110	298	400	385	none	hypothetical protein
COO91_00493	0.869683	3.03261	12.4206	0.00260533	0.0128826	47	35	31	100	109	132	none	hypothetical protein
COO91_10513	0.869243	2.89899	16.0339	0.000919749	0.00558662	44	42	33	94	131	135	none	Membrane-bound metallopeptidase
COO91_09931	0.868779	5.6658	49.9274	1.90188e-06	3.77032e-05	237	224	206	608	736	666	none	Transposase
COO91_10770	0.86795	1.98245	10.7567	0.00442211	0.0195527	24	14	17	43	68	56	none	Arc-type ribbon-helix-helix
COO91_09052	0.867498	5.04047	47.2196	2.71832e-06	4.97013e-05	137	149	157	417	463	455	pstA	phosphate transport system permease protein
COO91_10674	0.867288	2.74898	8.52318	0.00956465	0.0362619	27	21	34	60	97	93	parA	chromosome partitioning protein
COO91_09933	0.866756	1.76343	10.2654	0.00520617	0.0223973	17	13	20	40	64	48	none	Ca2+-binding protein%2C RTX toxin-related
COO91_09943	0.866599	2.98392	13.259	0.00202129	0.0104932	24	33	25	82	99	65	none	fdxN element excision controlling factor protein
COO91_09495	0.865688	2.3602	11.1576	0.00388013	0.0175666	17	20	29	57	73	70	none	Type II site-specific deoxyribonuclease
COO91_07247	0.865658	4.48259	34.5218	1.83908e-05	0.000236235	137	113	104	341	381	340	none	NTP pyrophosphatase%2C house-cleaning of non-canonical NTPs
COO91_02908	0.864606	2.3361	12.5015	0.00254137	0.0126313	27	34	27	74	96	95	ybgC	acyl-CoA thioester hydrolase [EC:3.1.2.-]
COO91_07712	0.86344	2.69653	14.1994	0.00153455	0.00835934	37	30	34	76	129	101	none	hypothetical protein
COO91_03837	0.862694	6.43909	33.1782	2.31513e-05	0.000285735	427	372	294	902	1259	1123	chlP	geranylgeranyl reductase [EC:1.3.1.83]
COO91_10243	0.860267	6.42104	45.3574	3.50679e-06	6.03458e-05	314	418	354	930	1263	1065	none	Large exoprotein involved in heme utilization or adhesion
COO91_04857	0.858703	1.27124	8.99085	0.00808512	0.0316962	10	11	10	29	28	36	none	hypothetical protein
COO91_10508	0.85829	5.27689	45.7093	3.34004e-06	5.80299e-05	199	170	173	538	533	546	none	putative ATPase%2C archaeal AAA+ ATPase superfamily
COO91_09427	0.857548	2.56965	11.673	0.00329011	0.0154308	20	27	24	51	90	73	none	Amino acid transporter
COO91_03751	0.857454	5.99801	43.026	4.87831e-06	7.83425e-05	324	270	312	803	1024	894	none	Transposase
COO91_03222	0.855994	4.03772	31.6844	3.01328e-05	0.000352602	61	68	61	177	203	187	none	Chaperone protein DnaK
COO91_00432	0.855187	4.01808	24.8001	0.000114478	0.00103952	148	127	127	336	446	423	none	putative arabinose efflux permease%2C MFS family
COO91_06856	0.854432	2.89538	17.2973	0.000658095	0.00425514	30	27	25	74	92	79	none	hypothetical protein
COO91_06728	0.853877	3.85178	23.803	0.000141548	0.00123957	72	85	55	179	206	246	ancrpA	transcriptional regulator
COO91_01123	0.853424	3.40337	15.28	0.00113068	0.00654466	21	16	23	51	61	68	none	hypothetical protein
COO91_09026	0.853035	2.04153	8.87374	0.00842969	0.0327085	15	29	14	55	60	57	menF	menaquinone-specific isochorismate synthase [EC:5.4.4.2]
COO91_08753	0.852604	2.12599	10.8139	0.00433979	0.0192496	28	25	26	80	77	78	none	putative kinase%2C aminoglycoside phosphotransferase
COO91_03849	0.85224	8.10776	19.5653	0.000595696	0.00394121	1489	1544	1108	3223	4808	4324	none	putative secreted protein
COO91_01842	0.85148	1.65119	8.51772	0.00958367	0.0363086	12	22	15	44	63	39	none	Inorganic pyrophosphatase
COO91_00398	0.850292	2.49866	10.9162	0.00419689	0.0187097	23	24	28	68	89	67	none	hypothetical protein
COO91_10760	0.849061	4.9977	30.3154	3.86543e-05	0.000430004	141	158	149	405	458	469	none	Ca2+-binding protein%2C RTX toxin-related
COO91_11030	0.848929	3.8688	19.2427	0.000403106	0.00287616	58	100	68	207	247	215	none	Tetratricopeptide
COO91_02665	0.848593	7.98637	53.7487	1.17725e-06	2.59524e-05	1754	1579	1537	4083	5133	5306	UGDH	UDPglucose 6-dehydrogenase [EC:1.1.1.22]
COO91_00273	0.848221	5.67694	57.1126	7.88458e-07	1.90923e-05	258	282	229	669	822	792	none	ABC-type bacteriocin/lantibiotic exporters%2C containing an N-terminal double-glycine peptidase domain
COO91_06660	0.846366	6.92298	58.5695	6.66602e-07	1.67798e-05	684	725	578	1576	2325	2010	none	Serine protease%2C subtilase family
COO91_06322	0.846212	3.99239	28.7667	5.17066e-05	0.000543899	80	99	88	219	321	255	none	mRNA-degrading endonuclease
COO91_09634	0.845843	5.59355	42.8947	4.97179e-06	7.92861e-05	334	336	271	787	1057	949	none	Lhr-like helicase
COO91_09615	0.845469	6.14727	32.8033	2.47155e-05	0.000301807	305	353	356	949	1000	1057	none	ATPase involved in DNA repair
COO91_06415	0.845196	4.95625	27.971	6.0284e-05	0.000607725	118	149	156	352	488	421	ABC-2.LPSE.P	lipopolysaccharide transport system permease protein
COO91_01177	0.844284	6.38689	49.6107	1.9815e-06	3.88546e-05	414	383	319	1014	1217	1068	none	Transposase
COO91_08128	0.843932	5.3136	12.2569	0.00367045	0.0168772	415	376	395	784	1469	1307	none	hypothetical protein
COO91_02994	0.842582	2.23322	13.7762	0.00173504	0.00925867	20	22	15	47	63	59	none	hypothetical protein
COO91_01671	0.842049	2.77267	10.5928	0.00466777	0.0204385	17	28	20	70	58	63	none	Molecular chaperone IbpA%2C HSP20 family
COO91_05587	0.839655	3.46275	16.1194	0.000898744	0.00549295	28	27	26	69	95	76	hupC	hydrogenase expression/formation protein
COO91_02000	0.839301	3.63331	19.9078	0.000343118	0.00252647	84	57	63	177	202	225	none	hypothetical protein
COO91_01490	0.838585	5.12986	18.1093	0.00055079	0.00369836	153	170	175	457	446	567	none	ATPase involved in DNA repair
COO91_07250	0.837539	3.42738	15.2967	0.00112546	0.00653678	59	29	39	120	127	128	moaD	molybdopterin synthase sulfur carrier subunit
COO91_03965	0.837329	1.63179	7.6327	0.0133133	0.0471811	16	13	8	35	39	35	none	hypothetical protein
COO91_10893	0.836448	2.0563	11.81	0.0031507	0.0149052	20	22	13	47	55	60	none	hypothetical protein
COO91_00988	0.836355	2.7363	8.5004	0.00964421	0.0364869	49	32	32	110	86	136	none	DNA primase
COO91_08936	0.836251	5.55783	50.5841	1.74797e-06	3.49724e-05	263	258	217	661	723	786	ppx-gppA	exopolyphosphatase / guanosine-5'-triphosphate,3'-diphosphate pyrophosphatase [EC:3.6.1.11 3.6.1.40]
COO91_00962	0.836234	3.96504	23.9363	0.000137545	0.00120918	54	61	77	182	192	193	none	Phenylpropionate dioxygenase or related ring-hydroxylating dioxygenase%2C large terminal subunit
COO91_05367	0.836017	4.52199	17.4335	0.000635284	0.00413489	104	104	90	232	373	277	aphA,cph1	phytochrome A, two-component sensor protein
COO91_07004	0.835293	3.05979	13.2327	0.00203719	0.0105707	40	42	40	121	102	135	none	CemA family protein
COO91_07716	0.83527	7.67821	59.911	5.72775e-07	1.47965e-05	971	959	945	2547	2923	3005	none	hypothetical protein
COO91_09927	0.834482	2.07244	9.99504	0.00570392	0.0239485	26	15	18	45	71	59	none	Arc-type ribbon-helix-helix
COO91_09144	0.83428	5.29776	35.2751	1.62078e-05	0.000212647	172	179	156	434	552	507	none	Transposase
COO91_09370	0.833752	5.2993	39.2143	8.61861e-06	0.000125387	167	154	122	379	465	458	none	Extracellular
COO91_09206	0.83136	5.16904	44.3219	4.0541e-06	6.77185e-05	219	228	210	617	612	695	none	DNA primase
COO91_04295	0.830682	3.45514	26.8864	7.46602e-05	0.000731994	50	55	50	147	156	151	none	cAMP-binding domain of CRP or a regulatory subunit of cAMP-dependent protein kinases
COO91_02223	0.828725	2.89929	12.3734	0.00264349	0.0130296	39	30	29	74	111	104	E2.1.1.72	site-specific DNA-methyltransferase (adenine-specific) [EC:2.1.1.72]
COO91_06734	0.82869	6.51009	23.3554	0.000170999	0.00145054	375	380	358	988	1160	1115	TSTA3	GDP-L-fucose synthase [EC:1.1.1.271]
COO91_09155	0.828017	2.92084	10.4804	0.00484526	0.0210369	40	31	31	82	94	124	none	putative membrane protein
COO91_02072	0.826846	4.17715	19.175	0.000409837	0.0029089	66	59	70	185	176	210	E4.3.1.19	threonine dehydratase [EC:4.3.1.19]
COO91_08634	0.82585	4.91096	31.6757	3.018e-05	0.000352773	121	149	135	322	483	385	none	DNA-binding response regulator%2C OmpR family%2C containings REC and winged-helix
COO91_02081	0.82398	3.7338	11.4157	0.00357095	0.0165333	55	51	66	174	153	175	none	DNA-binding transcriptional regulator%2C MocR family%2C containings an aminotransferase domain
COO91_01442	0.82382	4.53743	24.4174	0.000124114	0.00110934	148	104	96	273	411	337	none	hypothetical protein
COO91_00019	0.823754	5.92521	56.2282	8.74488e-07	2.06339e-05	302	304	270	758	981	821	none	Transposase
COO91_07692	0.823754	5.92521	56.2282	8.74488e-07	2.06339e-05	302	304	270	758	981	821	none	Transposase
COO91_00430	0.823437	3.16308	11.5111	0.00346377	0.0161255	73	62	80	173	237	223	none	hypothetical protein
COO91_10900	0.823388	4.69598	37.9037	1.05786e-05	0.00015007	130	126	115	333	416	334	aroA	3-phosphoshikimate 1-carboxyvinyltransferase [EC:2.5.1.19]
COO91_09509	0.823359	4.43473	19.6616	0.00036407	0.00264896	117	162	113	318	426	400	none	hypothetical protein
COO91_02340	0.821325	2.75023	9.9493	0.00579333	0.0242674	21	29	34	73	85	88	none	putative RNA binding protein YcfA%2C dsRBD-like fold%2C HicA-like mRNA interferase family
COO91_09780	0.820881	4.31896	16.3528	0.000844128	0.00523601	42	45	30	88	138	116	none	Protein of unknown function DUF2811
COO91_09978	0.820813	4.21087	20.1308	0.000325299	0.00243165	115	108	112	281	348	351	none	hypothetical protein
COO91_09312	0.820313	6.11254	57.2363	7.77197e-07	1.89468e-05	344	343	308	847	1123	933	none	Transposase
COO91_06463	0.820108	2.70681	10.7696	0.0044034	0.0194859	38	39	23	98	70	121	dndD	DNA sulfur modification protein DndD
COO91_01208	0.818805	2.85324	14.9034	0.00125602	0.00710618	34	33	35	87	115	96	none	PEP-CTERM protein-sorting domain
COO91_07732	0.817811	5.91709	55.1604	9.92666e-07	2.2668e-05	300	303	268	749	974	812	none	Transposase
COO91_10188	0.817637	4.43896	22.212	0.000200933	0.0016615	111	93	97	280	308	287	none	hypothetical protein
COO91_09002	0.816617	4.95579	20.8512	0.000274462	0.00214496	114	135	99	307	332	369	folC	dihydrofolate synthase / folylpolyglutamate synthase [EC:6.3.2.12 6.3.2.17]
COO91_02524	0.816162	1.84867	7.67973	0.013078	0.0465645	15	15	19	33	55	56	none	Quinol monooxygenase YgiN
COO91_00001	0.813738	5.91231	54.9463	1.01844e-06	2.31104e-05	300	301	267	746	966	807	none	Transposase
COO91_09925	0.813542	6.02531	56.4837	8.48602e-07	2.01874e-05	319	321	291	796	1039	868	none	Transposase
COO91_01164	0.812865	3.7309	16.1877	0.000882354	0.00541725	59	68	80	170	236	198	none	putative transposase YbfD/YdcC associated with H repeats
COO91_01025	0.812099	5.86036	52.5947	1.35689e-06	2.91408e-05	294	282	239	708	860	791	none	Transposase
COO91_07991	0.808617	2.89448	13.3103	0.00199066	0.0103591	30	28	35	62	109	101	mvpA	tRNA(fMet)-specific endonuclease VapC [EC:3.1.-.-]
COO91_11182	0.808601	4.85341	25.1828	0.000105668	0.000970926	93	108	82	203	346	273	none	Large exoprotein involved in heme utilization or adhesion
COO91_04945	0.808492	2.18056	9.11437	0.00773884	0.0306628	24	21	10	43	55	61	none	Serine/threonine protein kinase
COO91_02217	0.808087	2.59731	8.46095	0.00978371	0.0369243	28	33	33	75	108	90	none	hypothetical protein
COO91_11180	0.807823	4.09593	19.176	0.000409738	0.0029089	48	66	66	156	181	184	none	Tetratricopeptide
COO91_02095	0.807619	1.77479	9.00267	0.00805124	0.0316092	18	14	13	32	56	43	none	putative Zn-dependent protease
COO91_03152	0.805768	4.82017	17.4621	0.000630608	0.00410939	146	159	131	382	480	394	none	mRNA-degrading endonuclease RelE%2C toxin component of the RelBE toxin-antitoxin system
COO91_09828	0.805156	6.27691	26.3372	8.33762e-05	0.00080219	361	377	282	986	861	1069	none	pathogenesis-related transcriptional factor and ERF
COO91_04196	0.804323	2.95252	10.9005	0.00421841	0.0187939	29	36	41	78	105	125	pstB	phosphate transport system ATP-binding protein [EC:3.6.3.27]
COO91_01510	0.803887	5.08246	24.7031	0.000116836	0.00105562	241	251	160	559	741	570	cpcE	phycocyanin alpha subunit phycocyanobilin lyase, CpcE subunit
COO91_00061	0.802336	3.88769	12.125	0.00285482	0.0137949	43	93	45	157	178	182	none	Site-specific recombinase XerD
COO91_09970	0.801278	4.36539	8.40475	0.0117001	0.0424689	108	102	108	211	382	332	none	hypothetical protein
COO91_07793	0.800369	4.7098	18.9499	0.000433163	0.00304057	230	178	140	426	540	611	none	Glycosidase
COO91_00455	0.798405	3.57096	15.7526	0.000992809	0.0059374	67	80	50	178	189	195	none	hypothetical protein
COO91_07240	0.798337	4.13818	13.0903	0.00212585	0.0109939	71	75	82	181	230	247	none	Type I site-specific restriction endonuclease%2C part of a restriction-modification system
COO91_05526	0.798108	4.94609	29.9438	4.14108e-05	0.000455519	131	124	145	413	345	385	none	hypothetical protein
COO91_09131	0.797315	6.20942	53.3567	1.2351e-06	2.70622e-05	381	368	322	888	1186	1001	none	Transposase
COO91_09162	0.797315	6.20942	53.3567	1.2351e-06	2.70622e-05	381	368	322	888	1186	1001	none	Transposase
COO91_10997	0.797224	4.08199	16.8233	0.000744971	0.00470453	96	117	97	246	341	304	none	hypothetical protein
COO91_06668	0.796644	3.40227	9.71767	0.00627112	0.025889	52	76	57	120	200	214	none	putative ABC-type transport system%2C permease component
COO91_10855	0.796299	2.68664	14.6675	0.00134248	0.00750955	41	34	33	110	98	100	none	Cell division protein DedD
COO91_05277	0.795733	3.01741	14.8061	0.00129091	0.00727371	85	63	76	169	234	244	cpt	chloramphenicol 3-O phosphotransferase [EC:2.7.1.-]
COO91_03780	0.795646	6.35748	17.0852	0.000874936	0.00538698	424	369	238	786	1230	937	apcA	allophycocyanin alpha subunit
COO91_00484	0.795532	3.12123	11.0562	0.00400972	0.0180462	36	32	35	89	126	81	ndhF3	NADH dehydrogenase subunit 5
COO91_07963	0.795417	5.08437	25.5245	9.8442e-05	0.000913839	171	165	176	444	548	478	none	SRSO17 transposase
COO91_02430	0.794355	7.86892	73.0198	1.47779e-07	4.93692e-06	1157	1296	1049	2900	3581	3536	none	Nitrous oxidase accessory protein NosD%2C containings tandem CASH domains
COO91_03781	0.794227	6.34848	25.5753	9.74159e-05	0.000907426	355	297	242	764	912	878	apcB	allophycocyanin beta subunit
COO91_00054	0.793868	6.10931	51.5649	1.54336e-06	3.19413e-05	357	344	301	836	1100	933	none	Transposase
COO91_01336	0.793868	6.10931	51.5649	1.54336e-06	3.19413e-05	357	344	301	836	1100	933	none	Transposase
COO91_01873	0.793868	6.10931	51.5649	1.54336e-06	3.19413e-05	357	344	301	836	1100	933	none	Transposase
COO91_01012	0.793381	6.10917	51.4558	1.56473e-06	3.21378e-05	357	344	301	836	1100	932	none	Transposase
COO91_03440	0.793381	6.10917	51.4558	1.56473e-06	3.21378e-05	357	344	301	836	1100	932	none	Transposase
COO91_07568	0.793193	5.589	23.4253	0.000153622	0.00133131	269	230	261	653	799	729	none	4-hydroxybenzoate polyprenyltransferase
COO91_02973	0.791358	6.00224	20.3831	0.000314587	0.00236793	205	254	181	550	639	632	galM	aldose 1-epimerase [EC:5.1.3.3]
COO91_11198	0.790424	5.82823	50.7175	1.71844e-06	3.44452e-05	270	249	258	725	742	747	none	hypothetical protein
COO91_08080	0.78771	4.75095	28.7686	5.16873e-05	0.000543899	166	135	161	388	453	481	none	NADH:ubiqui oxidoreductase subunit 5
COO91_03457	0.787433	7.95168	57.4694	7.56466e-07	1.86872e-05	1256	1418	1144	3386	3629	3817	none	IS4 transposase
COO91_08427	0.787433	7.95175	57.5265	7.51479e-07	1.8656e-05	1256	1418	1144	3386	3629	3817	none	IS4 transposase
COO91_08143	0.787433	7.95175	57.481	7.55445e-07	1.86872e-05	1256	1418	1144	3386	3629	3817	none	IS4 transposase
COO91_01182	0.787276	7.95265	57.4332	7.59641e-07	1.86872e-05	1256	1420	1145	3390	3631	3818	none	IS4 transposase
COO91_08454	0.787176	3.03231	13.4092	0.00193301	0.0101308	36	30	35	82	100	107	none	Triacylglycerol esterase/lipase EstA%2C alpha/beta hydrolase fold
COO91_09692	0.7871	6.21901	52.1585	1.4326e-06	3.03352e-05	381	366	328	891	1173	1001	none	Transposase
COO91_09901	0.7871	6.21901	52.1585	1.4326e-06	3.03352e-05	381	366	328	891	1173	1001	none	Transposase
COO91_09956	0.7871	6.21901	52.1585	1.4326e-06	3.03352e-05	381	366	328	891	1173	1001	none	Transposase
COO91_01501	0.787098	7.95219	57.3658	7.65599e-07	1.8791e-05	1257	1419	1144	3387	3629	3819	none	IS4 transposase
COO91_10366	0.786915	3.69119	19.6188	0.000367857	0.00266511	62	49	59	158	143	183	none	Transposase%2C IS5 family
COO91_09753	0.786645	6.21889	52.057	1.4509e-06	3.04942e-05	381	366	328	891	1173	1000	none	Transposase
COO91_09159	0.786144	8.0555	52.7565	1.32994e-06	2.88482e-05	1344	1504	1223	3605	3846	4090	none	IS4 transposase
COO91_00095	0.78613	7.95228	57.2382	7.77028e-07	1.89468e-05	1260	1419	1144	3389	3630	3817	none	IS4 transposase
COO91_04725	0.786111	3.58075	14.1194	0.00157035	0.00850678	41	51	65	117	161	173	none	Acetyltransferase
COO91_09138	0.785842	8.05495	52.6185	1.35288e-06	2.91126e-05	1343	1504	1223	3602	3848	4086	none	IS4 transposase
COO91_01514	0.785536	7.48856	35.5513	1.54812e-05	0.000205199	780	722	544	1645	2362	1811	cpcA	C-phycocyanin alpha subunit
COO91_09224	0.784956	4.53293	18.6885	0.000462143	0.00320656	112	93	104	250	335	298	none	Superfamily II DNA or RNA helicase%2C SNF2 family
COO91_10357	0.784079	4.4794	16.9193	0.000726376	0.00460052	141	175	137	365	425	497	none	Large exoprotein involved in heme utilization or adhesion
COO91_08440	0.7827	3.66456	14.3563	0.00146692	0.00807276	59	63	78	159	222	191	none	putative transposase YbfD/YdcC associated with H repeats
COO91_08315	0.782619	7.43526	14.1937	0.0022504	0.0115333	920	1209	933	2812	3051	2777	none	Large exoprotein involved in heme utilization or adhesion
COO91_08372	0.782524	5.08382	23.1191	0.000164258	0.00140659	170	167	182	449	547	481	none	SRSO17 transposase
COO91_10168	0.782203	4.19632	15.0221	0.00121491	0.00692973	117	102	86	231	370	268	none	Endonuclease%2C Uma2 family
COO91_08566	0.781652	2.37615	7.51923	0.0139012	0.0487578	25	25	29	47	83	97	none	Large exoprotein involved in heme utilization or adhesion
COO91_07771	0.780671	2.80544	9.68494	0.00634214	0.0260894	27	23	20	56	73	70	none	hypothetical protein
COO91_04261	0.780111	4.89347	22.8238	0.000175301	0.00148355	136	159	180	355	517	486	murD	UDP-N-acetylmuramoylalanine--D-glutamate ligase [EC:6.3.2.9]
COO91_03871	0.779921	3.51069	15.5385	0.00105278	0.00620617	45	64	41	123	140	161	none	Tetratricopeptide
COO91_02143	0.779451	2.79298	11.3853	0.00360585	0.0166794	27	32	43	84	120	87	none	Sugar transferase involved in LPS biosynthesis
COO91_08973	0.779385	5.82886	35.5627	1.5452e-05	0.000205199	282	260	216	609	815	725	none	Periplasmic serine protease%2C S1-C subfamily%2C containing C-terminal PDZ domain
COO91_09585	0.779107	2.41467	11.7886	0.00317205	0.0149866	25	31	30	83	85	75	none	Murein DD-endopeptidase MepM and murein hydrolase activator NlpD%2C containing LysM domain
COO91_07768	0.778723	5.05255	22.4239	0.00019161	0.0016003	164	163	181	441	532	469	none	SRSO17 transposase
COO91_08561	0.778715	4.7602	13.6025	0.00185855	0.00978928	113	119	78	213	383	285	none	hypothetical protein
COO91_00802	0.778418	3.6904	13.5436	0.00185774	0.00978928	61	58	61	174	160	174	none	hypothetical protein
COO91_10306	0.778118	5.71433	46.2812	3.0876e-06	5.46976e-05	270	267	224	635	820	698	none	Transposase
COO91_11067	0.778118	5.71433	46.2812	3.0876e-06	5.46976e-05	270	267	224	635	820	698	none	Transposase
COO91_09226	0.778069	5.54997	20.4854	0.000299063	0.00228767	197	175	222	526	515	645	none	Putative intracellular protease/amidase
COO91_01511	0.777374	5.02202	31.1277	3.33148e-05	0.000381991	188	187	203	498	600	541	cpcD	phycocyanin-associated, rod
COO91_09208	0.777174	3.48066	11.1895	0.00384036	0.0174143	74	60	65	154	213	199	none	Tetratricopeptide
COO91_02533	0.775816	3.07837	10.9857	0.00410272	0.0183731	49	65	40	108	159	169	none	Short-chain dehydrogenase/reductase SDR
COO91_03846	0.775531	4.08117	14.7286	0.00131945	0.0074114	112	122	76	208	380	291	none	hypothetical protein
COO91_00358	0.774621	3.84565	22.0816	0.000206927	0.00169809	77	88	56	181	210	231	none	Molybdopterin-binding protein
COO91_01199	0.773008	5.06564	22.0624	0.000207824	0.00170158	168	166	180	442	537	474	none	SRSO17 transposase
COO91_05561	0.772789	5.87463	15.4723	0.00123978	0.0070436	198	300	202	566	701	701	mop	molybdo-pterin binding protein
COO91_08319	0.771997	5.06768	21.812	0.000219959	0.00179145	168	166	181	442	537	476	none	SRSO17 transposase
COO91_10032	0.769563	5.09709	22.9634	0.000169981	0.00144304	136	147	192	385	515	447	none	Phenylpropionate dioxygenase or related ring-hydroxylating dioxygenase%2C large terminal subunit
COO91_08607	0.769174	5.06462	21.5547	0.000233257	0.00188275	168	166	180	442	536	471	none	SRSO17 transposase
COO91_08308	0.768222	5.06337	21.597	0.000231008	0.00186878	168	166	180	442	535	471	none	SRSO17 transposase
COO91_08278	0.767616	5.92041	38.4389	9.72362e-06	0.000139218	314	347	254	762	912	889	prkC	eukaryotic-like serine/threonine-protein kinase [EC:2.7.11.1]
COO91_09928	0.767183	3.15418	12.8067	0.00231562	0.0118005	42	44	52	109	147	134	none	hypothetical protein
COO91_00964	0.767116	2.89209	8.24969	0.0105709	0.0391712	25	35	29	57	105	90	rpaB	two-component system, OmpR family, response regulator RpaB
COO91_04537	0.76637	4.56823	12.6014	0.00250973	0.0125336	101	123	120	296	319	351	none	Peptidoglycan/xylan/chitin deacetylase%2C PgdA/CDA1 family
COO91_09851	0.766158	4.32488	21.9977	0.000210884	0.00172533	92	95	89	213	320	245	none	hypothetical protein
COO91_00238	0.765718	4.51186	30.8639	3.49521e-05	0.000396563	122	108	106	291	353	299	none	Non-ribosomal peptide synthetase component F
COO91_06412	0.765702	5.85952	13.0773	0.00261671	0.0129271	228	235	213	576	686	634	none	Beta-phosphoglucomutase or related phosphatase%2C HAD superfamily
COO91_04100	0.765265	7.21856	39.8277	7.84366e-06	0.000116461	626	535	505	1335	1776	1574	chlH	magnesium chelatase subunit H [EC:6.6.1.1]
COO91_09688	0.765214	5.47872	29.0043	4.94164e-05	0.00052646	252	234	205	548	756	638	none	Transposase
COO91_03429	0.764996	5.41813	36.0489	1.42625e-05	0.000191772	280	303	241	668	801	840	none	Large exoprotein involved in heme utilization or adhesion
COO91_05789	0.764865	4.72726	15.9771	0.000934003	0.0056605	88	127	131	295	322	355	none	Sensor protein KdpD%2C transmembrane domain
COO91_10421	0.764533	4.36158	26.4688	8.11868e-05	0.000783214	76	75	75	188	243	204	none	Phenylpropionate dioxygenase or related ring-hydroxylating dioxygenase%2C large terminal subunit
COO91_05493	0.76308	3.83638	18.9075	0.000437728	0.00306268	78	80	65	177	215	233	none	hypothetical protein
COO91_09382	0.762999	6.27168	49.63	1.97653e-06	3.88275e-05	406	393	347	931	1236	1046	none	Transposase
COO91_10769	0.762709	3.06079	12.5937	0.00247071	0.0123925	39	42	49	104	136	126	none	Cobyrinic acid a%2Cc-diamide synthase
COO91_08062	0.762423	5.07	20.7511	0.000280962	0.00218629	168	166	183	443	538	470	none	SRSO17 transposase
COO91_01778	0.761018	6.58985	17.6469	0.000728411	0.00461071	727	643	598	1749	1838	1903	none	putative membrane protein YozV%2C TM2 domain
COO91_08140	0.760667	3.26944	15.5652	0.00104508	0.00617801	54	41	51	112	150	149	none	Tetratricopeptide
COO91_05916	0.760155	2.36669	9.81795	0.006059	0.0251853	16	23	26	58	59	65	none	hypothetical protein
COO91_08852	0.759781	3.02937	8.35841	0.0101572	0.0379431	43	64	57	126	177	157	none	Uncaracterized surface protein containing fasciclin
COO91_11095	0.758553	3.9798	19.6098	0.000368662	0.00266864	79	115	74	215	254	277	none	hypothetical protein
COO91_09025	0.758267	2.29307	7.6727	0.0131129	0.0466733	18	36	22	61	88	63	menA	DHNA phythltransferase
COO91_00839	0.756665	2.49837	13.5658	0.00184563	0.00974017	27	25	25	56	80	80	none	Transposase
COO91_10013	0.756104	6.19247	47.7955	2.51626e-06	4.68122e-05	382	371	328	877	1160	979	none	Transposase
COO91_03914	0.756008	3.05105	15.3856	0.00109811	0.00641278	40	46	41	108	130	116	E3.1.21.7	deoxyribonuclease V [EC:3.1.21.7]
COO91_08931	0.755654	5.63414	28.1571	5.81438e-05	0.000590938	314	368	305	846	940	957	none	hypothetical protein
COO91_08468	0.75457	4.22293	14.6991	0.00133051	0.00746188	58	43	35	99	142	139	none	hypothetical protein
COO91_01165	0.754504	5.00259	22.1088	0.000205661	0.00168898	165	156	171	420	517	436	none	SRSO17 transposase
COO91_01758	0.754176	2.18845	8.24216	0.0106002	0.0392665	32	22	24	52	79	88	doc	death on curing protein
COO91_04095	0.753984	3.73449	16.0382	0.000918675	0.00558323	71	55	64	171	187	171	none	hypothetical protein
COO91_03245	0.753912	5.99166	22.1235	0.000204978	0.0016881	286	321	288	677	988	836	none	PAS domain
COO91_10759	0.753327	7.66687	44.6597	3.86571e-06	6.50738e-05	1025	1161	935	2740	2769	3132	none	IS4 transposase
COO91_05340	0.752715	7.23425	39.6993	7.99926e-06	0.000117962	876	933	928	2302	2600	2718	none	hypothetical protein
COO91_11113	0.752536	7.66684	44.6046	3.89572e-06	6.54771e-05	1023	1163	936	2739	2768	3132	none	IS4 transposase
COO91_00003	0.752526	5.25185	21.3883	0.000242334	0.0019383	222	206	178	483	656	548	none	Transposase
COO91_00067	0.752526	5.25185	21.3883	0.000242334	0.0019383	222	206	178	483	656	548	none	Transposase
COO91_08439	0.752407	3.6398	15.3941	0.00109553	0.00640628	77	72	59	145	208	228	none	IS4 transposase
COO91_11096	0.749643	2.13459	9.06077	0.00788701	0.0311679	19	29	25	58	68	77	none	protein of unknown function DUF4365
COO91_08751	0.748437	3.44541	10.6388	0.00459729	0.0202034	70	58	65	172	168	195	none	hypothetical protein
COO91_01503	0.748037	4.58796	19.6833	0.00036217	0.00263804	87	128	119	291	330	304	none	Transposase%2C TnpA family
COO91_04890	0.747575	4.53129	23.5961	0.000148025	0.00128796	113	116	115	327	294	328	none	N-acetyl-anhydromuramyl-L-alanine amidase AmpD
COO91_10145	0.746464	3.7679	16.2683	0.000863448	0.00532837	79	86	51	165	227	205	none	Plastid lipid-associated protein/fibrillin conserved domain
COO91_02137	0.745928	3.27979	11.1863	0.00384425	0.0174247	39	49	62	121	179	118	none	Glycosyltransferase%2C catalytic subunit of cellulose synthase and poly-beta-1%2C6-N-acetylglucosamine synthase
COO91_10239	0.745658	4.77912	11.8778	0.00338126	0.0157958	260	237	289	591	648	953	none	putative ATPase
COO91_02572	0.745349	2.39747	11.2547	0.00376043	0.0172088	24	28	22	58	67	80	none	hypothetical protein
COO91_11181	0.743053	4.65895	20.0468	0.000331888	0.0024673	131	121	127	316	387	346	none	SRSO17 transposase
COO91_08670	0.742264	3.43777	10.443	0.00490598	0.0212409	63	78	55	142	197	203	fdhD	FdhD protein
COO91_05376	0.740361	4.77408	9.4716	0.00774199	0.0306628	151	141	148	329	510	382	none	Transposase
COO91_01495	0.739826	5.16805	12.5111	0.0027165	0.0132627	120	165	166	340	470	440	none	Transposase%2C IS5 family
COO91_04504	0.739826	5.16805	12.5111	0.0027165	0.0132627	120	165	166	340	470	440	none	Transposase%2C IS5 family
COO91_07555	0.739826	5.16805	12.5111	0.0027165	0.0132627	120	165	166	340	470	440	none	Transposase%2C IS5 family
COO91_07813	0.739826	5.16805	12.5111	0.0027165	0.0132627	120	165	166	340	470	440	none	Transposase%2C IS5 family
COO91_00233	0.739749	4.05332	13.8372	0.00170444	0.00911504	89	99	65	191	277	229	none	putative metal-dependent hydrolase
COO91_07422	0.739486	3.45032	8.41914	0.00993407	0.0373745	45	39	51	125	111	136	none	hypothetical protein
COO91_01888	0.738215	4.76708	9.8743	0.00664084	0.0270431	150	139	151	327	509	384	none	Transposase
COO91_02435	0.738176	6.56247	55.5521	9.47362e-07	2.17712e-05	515	490	446	1185	1449	1362	none	Glycosyltransferase%2C GT2 family
COO91_10195	0.737616	8.01487	51.4941	1.5572e-06	3.2105e-05	1344	1506	1231	3501	3740	3946	none	IS4 transposase
COO91_04112	0.736018	3.671	12.3345	0.00267534	0.0131328	70	74	75	173	218	213	none	hypothetical protein
COO91_10663	0.733549	3.05129	14.2564	0.00150959	0.00826186	44	43	50	115	133	129	none	hypothetical protein
COO91_02428	0.731568	7.45132	20.1162	0.000367413	0.00266467	1299	1307	1202	3151	3525	3755	ABC-2.OM	polysaccharide export outer membrane protein
COO91_05381	0.730445	2.29531	7.91039	0.0119899	0.0433609	22	25	21	60	73	53	none	Transposase
COO91_04779	0.730073	5.29779	22.1853	0.000202146	0.00167025	200	261	251	552	783	622	none	Type IV secretory pathway%2C VirB4 component
COO91_02103	0.729883	3.41147	12.2442	0.00275114	0.0134137	48	50	57	117	170	140	udp	uridine phosphorylase [EC:2.4.2.3]
COO91_06542	0.728189	4.90373	22.9093	0.00017202	0.00145692	126	106	128	267	394	331	none	Ubiqui/menaqui biosynthesis C-methylase UbiE
COO91_02277	0.727049	2.48036	8.46516	0.00976872	0.0368934	26	30	39	68	107	87	none	hypothetical protein
COO91_02898	0.726301	4.24499	21.817	0.000219706	0.00179074	102	79	89	240	269	228	none	Chromosome segregation ATPase
COO91_07709	0.725967	2.52149	12.3526	0.00266052	0.0130838	27	25	27	57	79	81	none	Transposase
COO91_06110	0.725231	4.46778	12.7594	0.00234907	0.0119149	211	200	124	478	482	486	none	Thiamin phosphate synthase YjbQ%2C UPF0047 family
COO91_00569	0.72454	4.77361	25.4338	0.000100304	0.000927944	200	175	172	401	605	494	sigC	RNA polymerase group 2 sigma subunit
COO91_08806	0.723528	2.49132	8.56374	0.00942488	0.0357822	20	37	25	69	92	62	none	Glutathionylspermidine synthase
COO91_06658	0.722994	3.02379	11.7606	0.00320023	0.0151	46	30	39	98	106	110	none	Endonuclease%2C Uma2 family
COO91_06684	0.721925	6.59643	44.0502	4.21308e-06	6.97284e-05	644	602	527	1322	1881	1638	none	Carbohydrate-selective porin OprB
COO91_00028	0.720484	3.25992	16.053	0.000915014	0.00556948	49	50	59	123	159	150	none	P-loop containing nucleoside triphosphate hydrolase
COO91_00089	0.720484	3.25992	16.053	0.000915014	0.00556948	49	50	59	123	159	150	none	hypothetical protein
COO91_08129	0.720107	7.97076	13.2669	0.00278312	0.0135361	2854	2677	2487	5044	7922	9043	none	Type 2 lantibiotic%2C leader peptide domain
COO91_00997	0.719908	3.51035	13.7645	0.00174103	0.00927405	60	55	39	123	155	140	parB	chromosome partitioning protein, ParB family
COO91_00108	0.718652	3.37173	10.6087	0.00464326	0.0203476	56	48	50	119	172	129	opuC	osmoprotectant transport system substrate-binding protein
COO91_00188	0.717879	4.88537	19.4665	0.000381691	0.00274513	123	139	156	317	441	384	none	3'%2C5'-cyclic AMP phosphodiesterase CpdA
COO91_09055	0.716647	3.53597	7.92033	0.0119454	0.0432477	38	45	68	134	121	156	none	putative antitoxin%2C containings HTH domain
COO91_03859	0.716584	3.23338	9.23681	0.00741204	0.029611	55	28	38	93	123	114	none	hypothetical protein
COO91_10509	0.716271	3.41694	14.6139	0.00136303	0.00760488	48	60	63	130	179	157	none	Thymidylate kinase
COO91_05360	0.716169	2.55629	11.621	0.00334474	0.0156454	35	33	34	75	103	100	none	hypothetical protein
COO91_06686	0.716043	4.45935	14.5498	0.0013881	0.00771157	110	139	114	286	349	349	none	Protein of unknown function DUF3318
COO91_10527	0.716032	6.79145	40.713	6.85892e-06	0.000104712	642	672	722	1585	2023	1939	none	Ca2+-binding protein%2C RTX toxin-related
COO91_09378	0.715885	4.51387	21.1446	0.000256356	0.00202836	86	122	86	233	272	290	none	Tetratricopeptide
COO91_02324	0.714668	4.75844	9.23255	0.00821642	0.0321295	149	139	151	325	498	374	none	Transposase
COO91_06676	0.714005	7.92054	14.8872	0.00164626	0.00882574	921	770	896	2334	2239	2424	none	Myosin heavy chain
COO91_08196	0.713014	2.62494	9.16871	0.00759183	0.0302555	24	25	34	84	73	67	rpaB	two-component system, OmpR family, response regulator RpaB
COO91_09895	0.710042	3.15562	9.47412	0.00682207	0.0276252	40	39	32	86	110	104	none	hypothetical protein
COO91_07941	0.709845	4.75381	8.97358	0.00901014	0.0344128	149	139	151	324	497	372	none	Transposase
COO91_05149	0.708684	4.75449	9.02507	0.0088346	0.0339064	149	139	151	324	496	372	none	Transposase
COO91_03742	0.708538	4.75201	8.99109	0.00894576	0.0342287	149	139	151	323	496	373	none	Transposase
COO91_03887	0.708326	2.95499	8.88049	0.00840941	0.0326717	30	32	41	82	83	114	none	fdxN element excision controlling factor protein
COO91_07901	0.707371	5.37014	11.5786	0.00370722	0.017003	190	163	174	426	482	515	parD1_3_4	antitoxin ParD1/3/4
COO91_10424	0.706278	5.90638	32.6224	2.55123e-05	0.000308887	228	249	260	582	700	709	none	Large exoprotein involved in heme utilization or adhesion
COO91_00018	0.702916	4.43835	22.6164	0.000183557	0.00154017	118	136	114	272	381	338	none	Type II secretory pathway%2C component ExeA
COO91_07691	0.702916	4.43835	22.6164	0.000183557	0.00154017	118	136	114	272	381	338	none	Type II secretory pathway%2C component ExeA
COO91_11023	0.70287	4.52783	11.9134	0.00304994	0.014532	72	124	115	229	308	302	none	GTPase SAR1 family domain
COO91_07207	0.702846	3.53272	12.5264	0.00252205	0.0125651	67	86	75	178	210	225	GLYK	D-glycerate 3-kinase [EC:2.7.1.31]
COO91_11200	0.702811	3.07322	9.13872	0.00767257	0.0304428	49	51	40	118	127	130	none	hypothetical protein
COO91_08911	0.701592	2.54296	10.9783	0.00411265	0.0184024	32	26	25	58	85	81	none	Transposase
COO91_03486	0.701525	5.55547	12.707	0.002507	0.0125281	186	118	156	396	357	483	none	protein of unknown function DUF4394
COO91_00927	0.701192	2.33203	9.71314	0.00628089	0.025889	25	26	17	47	73	63	none	hypothetical protein
COO91_01496	0.701192	2.33203	9.71314	0.00628089	0.025889	25	26	17	47	73	63	none	hypothetical protein
COO91_04503	0.701192	2.33203	9.71314	0.00628089	0.025889	25	26	17	47	73	63	none	hypothetical protein
COO91_07554	0.701192	2.33203	9.71314	0.00628089	0.025889	25	26	17	47	73	63	none	hypothetical protein
COO91_07812	0.701192	2.33203	9.71314	0.00628089	0.025889	25	26	17	47	73	63	none	hypothetical protein
COO91_06116	0.701088	2.94724	9.43429	0.00691726	0.0279598	49	38	36	76	142	115	none	Tetratricopeptide
COO91_06321	0.700534	7.38968	28.2765	5.68159e-05	0.000582915	1028	987	877	2379	2632	2732	Deg1	Periplasmic serine protease, S1-C subfamily, contain C-terminal PDZ domain
COO91_08668	0.700239	3.27978	12.3318	0.00267757	0.0131378	46	34	41	93	119	114	rluA	tRNA pseudouridine32 synthase / 23S rRNA pseudouridine746 synthase [EC:5.4.99.28 5.4.99.29]
COO91_02897	0.699518	3.05943	9.3701	0.00707387	0.0284321	33	28	41	90	88	96	tilS	tRNA(Ile)-lysidine synthase [EC:6.3.4.19]
COO91_06535	0.698778	5.57906	30.8938	3.47625e-05	0.000395656	284	257	254	591	817	731	none	Regulator of protease activity HflC%2C stomatin/prohibitin superfamily
COO91_00763	0.698286	3.24616	10.5065	0.0048034	0.0208887	64	53	61	136	177	166	none	CheY chemotaxis protein or a CheY-like REC
COO91_10644	0.697553	2.72784	10.5296	0.00476668	0.0207639	24	42	38	81	107	91	none	Murein DD-endopeptidase MepM and murein hydrolase activator NlpD%2C containing LysM domain
COO91_03972	0.696929	4.626	28.8121	5.12601e-05	0.000540758	134	143	125	291	393	395	none	GAF domain-like
COO91_00397	0.696066	3.58336	16.0775	0.000908978	0.0055461	55	64	56	149	172	146	none	molybdopterin-guanine dinucleotide biosynthesis protein A like
COO91_09788	0.695952	7.26298	37.604	1.1094e-05	0.000156559	592	506	439	1159	1513	1443	none	Phospholipase/lecithinase/hemolysin
COO91_03818	0.694712	4.29827	23.3642	0.000155682	0.001347	115	121	123	303	354	302	rsbU_P	phosphoserine phosphatase RsbU/P [EC:3.1.3.3]
COO91_03974	0.694048	3.28248	11.2031	0.00382354	0.017364	64	50	45	125	168	132	none	Pimeloyl-ACP methyl ester carboxylesterase
COO91_02305	0.693302	2.21076	8.22999	0.0106478	0.0393486	22	20	19	49	52	62	lspA	signal peptidase II [EC:3.4.23.36]
COO91_02427	0.693254	3.2999	14.2694	0.00150395	0.0082466	52	60	54	126	165	153	ABC-2.A	ABC-2 type transport system ATP-binding protein
COO91_00159	0.692067	4.15845	13.2594	0.00202101	0.0104932	59	58	69	136	162	201	none	Glycosyltransferase%2C GT2 family
COO91_04579	0.692052	6.76523	14.5399	0.00166178	0.00890013	758	751	630	1495	2389	1844	none	hypothetical protein
COO91_09377	0.69187	5.31829	11.7628	0.0033748	0.0157724	139	187	188	375	517	486	none	Transposase%2C IS5 family
COO91_08622	0.691411	2.57236	12.0332	0.00293772	0.014101	30	27	27	60	82	83	none	Transposase
COO91_08908	0.691209	5.2814	8.79974	0.0100215	0.0375859	200	210	176	508	507	539	none	Regulator of protease activity HflC%2C stomatin/prohibitin superfamily
COO91_00779	0.690911	5.0336	20.687	0.000285214	0.00220511	292	259	292	576	781	909	wcaI	colanic acid biosynthesis glycosyl transferase WcaI
COO91_06863	0.690869	4.26875	12.9977	0.00218579	0.0112501	106	110	73	245	255	265	trkH	trk system potassium uptake protein
COO91_02218	0.69051	5.84782	32.4421	2.63348e-05	0.000316368	269	277	268	585	794	800	none	putative integral membrane protein
COO91_09963	0.690163	4.28472	11.8972	0.00306551	0.0145723	96	63	71	180	197	237	parA	chromosome partitioning protein
COO91_04965	0.689081	4.50767	15.5079	0.00106167	0.00624538	98	115	110	246	327	289	none	Protein of unknown function DUF4926
COO91_08699	0.688386	2.35795	8.3809	0.0100739	0.037717	32	27	26	52	85	91	none	DNA topoisomerase VI%2C subunit A
COO91_10490	0.688328	3.03043	9.75775	0.00618534	0.0255828	50	54	48	126	162	116	none	hypothetical protein
COO91_11047	0.688328	3.03043	9.75775	0.00618534	0.0255828	50	54	48	126	162	116	none	hypothetical protein
COO91_10041	0.688275	5.22855	11.4614	0.00368222	0.0169169	129	175	175	347	479	455	none	Transposase%2C IS5 family
COO91_04395	0.688211	4.87901	21.002	0.000264983	0.00208747	180	167	156	386	483	471	none	Glycosyltransferase involved in cell wall bisynthesis
COO91_05913	0.688074	2.4923	9.79097	0.00611527	0.0253608	29	29	26	72	75	76	none	hypothetical protein
COO91_08755	0.687894	6.23602	22.2165	0.000200731	0.0016615	293	287	336	665	1007	784	none	Mn-dependent transcriptional regulator
COO91_01345	0.686937	4.18652	16.2217	0.000874326	0.00538698	84	103	69	201	243	234	none	Transposase%2C IS4-like
COO91_02142	0.68663	3.83757	12.1047	0.00287292	0.0138473	92	64	85	187	254	203	hepA	ATP-binding protein; heterocyst differentiation protein of ABC transporter
COO91_06814	0.684289	5.91271	30.5539	3.69932e-05	0.000414575	294	345	267	720	809	867	none	Transposase
COO91_01910	0.684054	5.84454	29.4605	4.53311e-05	0.000489196	308	349	260	693	838	897	cpcT	phycocyanobilin lyase
COO91_09150	0.684008	5.11782	28.2272	5.73596e-05	0.0005862	246	239	215	575	563	714	none	hypothetical protein
COO91_01093	0.683615	2.83677	8.27505	0.0104727	0.038914	22	32	20	67	71	57	none	Asp-tRNAAsn/Glu-tRNAGln amidotransferase A subunit or related amidase
COO91_08718	0.683604	5.79622	26.7893	7.61236e-05	0.000743288	254	259	319	626	811	785	none	Multidrug efflux pump subunit AcrA
COO91_09053	0.683123	6.77579	40.7345	6.8368e-06	0.000104645	523	505	506	1253	1386	1427	pstB	phosphate transport system ATP-binding protein [EC:3.6.3.27]
COO91_08901	0.683078	4.39018	10.3698	0.0050273	0.0217294	117	98	97	245	299	284	none	Tellurite resistance protein
COO91_10359	0.680011	3.56418	12.5894	0.00247393	0.0123965	78	65	44	139	179	176	none	Transposase
COO91_00693	0.679519	7.3383	38.4541	9.70053e-06	0.000139071	952	957	925	2258	2576	2662	none	hypothetical protein
COO91_06211	0.679283	4.38649	20.0892	0.000328543	0.00245082	153	163	137	388	405	399	none	Protein of unknown function DUF4359
COO91_10131	0.67899	3.50023	9.45038	0.00687863	0.0278334	48	58	49	129	169	111	copB	Cu2+-exporting ATPase [EC:3.6.3.4]
COO91_10427	0.678417	7.99834	36.5917	1.30539e-05	0.000179082	1408	1359	1138	3353	3484	3422	none	putative ATPase
COO91_04231	0.678029	5.19605	17.1556	0.000682814	0.00438102	118	117	121	254	321	370	none	hypothetical protein
COO91_01213	0.677753	5.34058	28.5548	5.38484e-05	0.000560977	182	181	188	446	479	531	none	Outer membrane protein assembly factor BamB%2C containings PQQ-like beta-propeller repeat
COO91_09311	0.67746	4.69217	25.5607	9.77097e-05	0.000909381	137	155	139	309	441	392	none	Type II secretory pathway%2C component ExeA
COO91_11264	0.676411	4.02985	19.6056	0.000369037	0.00266864	114	132	143	302	375	353	none	Protein N-acetyltransferase%2C RimJ/RimL family
COO91_10237	0.67597	7.59791	22.6812	0.00018093	0.00152049	2023	1538	1773	3712	4462	6004	hglE	heterocyst glycolipid synthase
COO91_02944	0.675759	3.97811	16.9628	0.00071813	0.00456165	99	90	89	186	278	274	none	hypothetical protein
COO91_08750	0.675427	6.6357	30.4268	3.78682e-05	0.000422127	463	533	499	1287	1239	1401	none	Phage shock protein A
COO91_09893	0.674892	3.31907	8.57293	0.00939354	0.035677	43	63	43	130	126	134	none	23S rRNA-intervening sequence protein
COO91_08081	0.674633	5.19962	19.3466	0.000392998	0.00281151	255	214	205	485	670	628	none	Endonuclease%2C Uma2 family
COO91_02515	0.672962	7.98071	51.1211	1.63243e-06	3.31316e-05	1245	1161	1157	2790	3350	3252	infC	translation initiation factor IF-3
COO91_06679	0.672296	6.3021	22.967	0.000169845	0.00144302	530	465	442	1154	1393	1232	phoB	two-component system, OmpR family, phosphate regulon response regulator PhoB
COO91_04764	0.671402	4.36163	17.2336	0.000669074	0.00430562	100	86	110	205	272	308	plsY	glycerol-3-phosphate acyltransferase PlsY [EC:2.3.1.15]
COO91_10624	0.671358	3.62035	12.0449	0.00292696	0.0140619	61	72	45	157	156	151	none	ATPase involved in DNA repair
COO91_02085	0.669512	2.32961	7.4687	0.0141724	0.0495645	23	29	19	56	61	69	OPLAH	5-oxoprolinase (ATP-hydrolysing) [EC:3.5.2.9]
COO91_06094	0.66949	4.00578	14.0554	0.00159969	0.00863595	130	128	116	252	353	382	none	DNA-directed RNA polymerase specialized sigma subunit%2C sigma24 family
COO91_08848	0.669292	3.4901	10.3058	0.00513602	0.0221483	57	97	47	147	202	176	rbsB	ribose transport system substrate-binding protein
COO91_07620	0.668166	5.55774	11.0916	0.0042288	0.018821	133	192	188	413	441	492	none	hypothetical protein
COO91_09124	0.667955	5.02019	13.3765	0.00195186	0.0102013	128	125	118	291	308	374	parA	chromosome partitioning protein
COO91_03764	0.665608	4.56049	11.0506	0.00401701	0.0180715	138	134	81	268	385	268	atp1	ATP synthase protein I
COO91_06815	0.665175	4.5128	21.5137	0.000235458	0.00189628	120	133	120	295	350	331	none	Transposase
COO91_09058	0.665135	2.99269	8.05062	0.0113788	0.0415112	38	54	32	99	113	111	recJ	single-stranded-DNA-specific exonuclease
COO91_05344	0.664752	5.55631	21.5755	0.000232147	0.00187519	251	231	194	531	619	616	none	Ubiqui/menaqui biosynthesis C-methylase UbiE
COO91_06984	0.664521	5.25045	18.9023	0.000438286	0.0030646	167	203	197	389	591	513	none	Nucleotide-binding universal stress protein%2C UspA family
COO91_03592	0.66447	3.78216	10.6211	0.00462434	0.0202976	58	89	54	144	199	182	none	hypothetical protein
COO91_10677	0.664173	2.87607	7.54117	0.0137852	0.0484098	42	36	21	71	117	71	none	hypothetical protein
COO91_04804	0.662872	6.448	31.1856	3.29671e-05	0.000378806	502	525	435	1209	1252	1343	none	hypothetical protein
COO91_09091	0.662705	4.31272	17.5071	0.000623327	0.00407521	109	123	104	242	340	298	none	Type II secretory pathway%2C component ExeA
COO91_03267	0.662618	3.4646	12.4327	0.00259568	0.0128501	69	51	43	131	137	157	xisI	fdxN element excision controlling factor protein
COO91_11094	0.66234	4.28336	16.189	0.000882058	0.00541725	114	141	99	256	330	338	none	Tetratricopeptide
COO91_09345	0.661907	2.47551	9.11791	0.00772917	0.0306561	28	29	19	51	80	68	none	hypothetical protein
COO91_03968	0.660373	3.81743	15.1094	0.00118565	0.00678661	83	72	68	183	207	191	none	Protein of unknown function DUF3445
COO91_02531	0.658396	5.81374	14.5785	0.00140148	0.00777928	423	454	397	827	1293	1220	none	Cytochrome c%2C mono- and diheme variants
COO91_08455	0.658395	3.40662	10.2933	0.00515768	0.0222152	36	55	42	111	100	134	none	putative protein%2C containings caspase domain
COO91_00983	0.65836	4.39287	16.9526	0.000720047	0.00457114	111	116	83	234	291	281	none	Transposase%2C IS4-like
COO91_05602	0.657979	4.935	21.4307	0.000239986	0.00192415	158	121	143	351	387	362	none	transposase
COO91_11199	0.657761	5.92359	21.0065	0.000264705	0.00208713	254	305	238	597	703	773	none	hypothetical protein
COO91_03664	0.657696	7.13029	46.8992	2.83854e-06	5.12647e-05	742	734	626	1671	1885	1905	none	Carbonic anhydrase or acetyltransferase%2C isoleucine patch superfamily
COO91_06034	0.657087	5.43279	30	4.09803e-05	0.000451242	238	269	245	589	690	678	none	Serine/threonine protein kinase
COO91_01487	0.655944	5.34731	22.5806	0.000185023	0.00155127	187	206	167	457	501	493	none	Tetratricopeptide
COO91_06366	0.654027	3.76376	11.9051	0.00305789	0.0145424	54	82	60	143	188	178	none	Lipopolysaccharide biosynthesis protein%2C LPS:glycosyltransferase
COO91_02285	0.652375	3.86285	14.193	0.00153739	0.00836637	64	79	61	143	183	204	TST	thiosulfate/3-mercaptopyruvate sulfurtransferase [EC:2.8.1.1 2.8.1.2]
COO91_07918	0.651691	4.39009	16.6677	0.000776229	0.00487632	111	116	83	235	287	280	none	Transposase%2C IS4-like
COO91_06998	0.650969	3.25814	11.3418	0.00365653	0.0168347	62	60	38	118	164	132	none	Catechol 2%2C3-dioxygenase or other lactoylglutathione lyase family enzyme
COO91_08215	0.650822	3.06869	11.2458	0.00377118	0.0172088	50	53	48	111	127	154	none	IS4 transposase
COO91_09376	0.650189	2.46235	8.75395	0.00879944	0.0338109	29	29	19	51	80	69	none	hypothetical protein
COO91_03915	0.650115	3.19715	11.2248	0.00379688	0.0172918	60	63	44	158	139	131	none	Forkhead associated
COO91_10040	0.649977	2.37867	8.5129	0.00960046	0.036351	27	27	18	48	75	64	none	Mobile element protein
COO91_01886	0.649738	4.38957	16.5484	0.000801203	0.00499336	111	116	83	234	287	280	none	Transposase%2C IS4-like
COO91_04405	0.649738	4.38957	16.5484	0.000801203	0.00499336	111	116	83	234	287	280	none	Transposase%2C IS4-like
COO91_07717	0.649738	4.38957	16.5484	0.000801203	0.00499336	111	116	83	234	287	280	none	Transposase%2C IS4-like
COO91_08442	0.649453	2.25577	8.90842	0.00832595	0.0324523	23	19	23	49	59	61	tenA	thiaminase (transcriptional activator TenA) [EC:3.5.99.2]
COO91_08884	0.649374	4.26156	14.6851	0.00133581	0.00748387	111	101	75	214	260	268	none	Transposase%2C IS4-like
COO91_09142	0.649198	4.82495	15.3074	0.00112211	0.00652644	168	171	133	339	495	389	none	Transposase
COO91_01679	0.648041	2.88156	8.87332	0.00843095	0.0327085	38	31	25	64	99	81	ABC.PA.P	polar amino acid transport system permease protein
COO91_08853	0.647718	2.75557	9.61588	0.00649503	0.0265592	46	42	40	83	115	135	none	DNA-binding response regulator%2C OmpR family%2C containings REC and winged-helix
COO91_05872	0.646516	5.70724	26.2303	8.52018e-05	0.00081685	438	459	402	1004	1196	1154	aroB	3-dehydroquinate synthase [EC:4.2.3.4]
COO91_04279	0.645512	5.69467	28.8281	5.1103e-05	0.000539648	255	290	232	591	771	642	none	Beta-glucanase%2C GH16 family
COO91_06838	0.645481	4.39348	16.7896	0.000751612	0.00473818	111	116	85	235	287	282	none	Transposase%2C IS4-like
COO91_04595	0.644549	5.43765	11.277	0.00380303	0.0173015	152	180	173	373	422	511	none	Lysophospholipase L1 or related esterase
COO91_01682	0.644068	3.45045	7.76635	0.0126568	0.0453332	38	38	45	76	115	124	none	hypothetical protein
COO91_03756	0.643741	4.39302	16.6564	0.00077857	0.00488819	111	116	85	235	287	281	none	Transposase%2C IS4-like
COO91_07956	0.643006	4.46132	16.5545	0.000799908	0.00499336	94	111	103	226	311	259	none	DNA-binding response regulator%2C OmpR family%2C containings REC and winged-helix
COO91_04102	0.642889	2.89912	11.2492	0.00376704	0.0172088	45	46	36	88	117	123	none	putative protein YuzE
COO91_09921	0.642781	7.48485	33.429	2.2167e-05	0.000275488	1028	1078	1159	2423	3091	2941	none	Ca2+-binding protein%2C RTX toxin-related
COO91_07733	0.641322	3.90691	9.30953	0.00722534	0.0289763	87	96	89	191	267	245	none	Type II secretory pathway%2C component ExeA
COO91_09237	0.64127	4.81646	17.5772	0.000612158	0.00402552	129	101	117	284	316	294	none	Ca2+-binding protein%2C EF-hand superfamily
COO91_08562	0.641199	4.38808	16.0922	0.000905376	0.00552724	111	116	84	233	286	280	none	Transposase%2C IS4-like
COO91_00386	0.640744	3.38737	8.1614	0.0109209	0.040193	54	40	55	126	132	126	none	hypothetical protein
COO91_01505	0.639759	7.26496	36.5996	1.30372e-05	0.000179082	896	956	982	2079	2694	2547	none	Ca2+-binding protein%2C RTX toxin-related
COO91_09950	0.639448	3.67875	12.7857	0.00233039	0.011844	44	58	48	103	158	126	none	hypothetical protein
COO91_05227	0.639262	3.84323	14.0419	0.00160593	0.00865669	80	66	93	176	225	218	none	hypothetical protein
COO91_07132	0.639247	5.06905	19.4091	0.000387059	0.00278005	167	134	136	351	399	373	none	Histidine kinase-like ATPase
COO91_01941	0.638712	2.36363	8.57283	0.00939388	0.035677	45	31	38	97	109	87	none	hypothetical protein
COO91_05646	0.638523	4.26862	9.49695	0.00676815	0.0274479	108	120	122	253	324	326	none	hypothetical protein
COO91_07805	0.638415	5.39928	21.8518	0.000217976	0.00177931	193	216	175	471	528	496	none	Tetratricopeptide
COO91_04673	0.638286	6.57	40.1328	7.48748e-06	0.000112095	461	505	469	1067	1323	1303	sdhA	succinate dehydrogenase / fumarate reductase, flavoprotein subunit [EC:1.3.5.1 1.3.5.4]
COO91_06708	0.637002	5.70841	18.2924	0.000510285	0.0034716	383	341	314	741	911	1019	none	Ribosome association toxin PasT
COO91_03973	0.636396	4.43952	11.2821	0.00372732	0.0170807	131	107	105	277	304	298	none	Catechol 2%2C3-dioxygenase or other lactoylglutathione lyase family enzyme
COO91_05563	0.636302	4.22684	15.089	0.00119242	0.00681455	120	127	124	262	362	332	LYS21	homocitrate synthase [EC:2.3.3.14]
COO91_07238	0.635585	4.97801	20.0215	0.000333904	0.00247208	126	151	127	294	378	365	none	hypothetical protein
COO91_01887	0.635209	4.54548	11.086	0.00397113	0.0179098	144	130	124	290	383	350	none	Mobile element protein
COO91_09977	0.634352	4.90723	17.6684	0.000597988	0.00394913	194	182	190	474	431	542	none	hypothetical protein
COO91_06683	0.634306	3.35021	7.5609	0.013682	0.0481762	60	48	49	111	159	134	none	cAMP-binding domain of CRP or a regulatory subunit of cAMP-dependent protein kinases
COO91_06323	0.6342	5.95951	9.84758	0.00681166	0.0275934	344	348	279	769	735	973	none	hypothetical protein
COO91_09687	0.632982	5.40725	26.3253	8.3577e-05	0.000802696	229	230	188	492	617	545	none	Site-specific DNA recombinase related to the DNA invertase Pin
COO91_00861	0.632172	3.10377	8.74215	0.00883684	0.0339064	34	50	33	103	100	94	none	putative transposase YdaD
COO91_11100	0.631973	3.26176	11.3611	0.003634	0.0167452	43	46	38	104	120	100	none	hypothetical protein
COO91_01908	0.629655	6.82912	9.41736	0.00856361	0.0330927	757	680	689	1633	1938	1866	none	hypothetical protein
COO91_10491	0.629161	5.41093	30.745	3.57201e-05	0.000402655	216	214	209	472	575	588	none	Endonuclease%2C Uma2 family
COO91_11046	0.629161	5.41093	30.745	3.57201e-05	0.000402655	216	214	209	472	575	588	none	Endonuclease%2C Uma2 family
COO91_10425	0.628602	5.08145	23.2904	0.00015821	0.0013656	138	165	132	339	373	395	none	Tetratricopeptide
COO91_05586	0.627534	5.45296	9.40422	0.00718636	0.0288307	110	102	89	225	304	239	hypF	hydrogenase maturation protein
COO91_10467	0.626093	5.17101	17.0261	0.000706307	0.00451036	169	206	199	493	518	446	none	ATP-dependent exoDNAse
COO91_02657	0.625745	4.62625	17.3469	0.000649687	0.00421596	144	190	171	354	442	494	none	hypothetical protein
COO91_08266	0.624278	4.34181	8.23103	0.0106438	0.0393486	84	74	61	179	183	193	none	DNA segregation ATPase FtsK/SpoIIIE
COO91_09528	0.624177	6.81861	24.7395	0.000115944	0.00105019	511	549	488	1086	1496	1368	none	Transposase
COO91_01951	0.623757	5.51333	18.1481	0.000529212	0.00358012	272	284	206	579	681	671	none	Glutamate-1-semialdehyde aminotransferase
COO91_10238	0.623503	4.59701	11.9835	0.00298372	0.0142838	277	241	251	576	581	802	none	DNA-directed RNA polymerase specialized sigma subunit%2C sigma24 family
COO91_04617	0.623453	4.35634	13.9781	0.00163594	0.00878781	107	114	81	225	271	270	none	Transposase%2C IS4-like
COO91_00274	0.622956	5.12971	16.2807	0.000860595	0.00531683	213	173	169	424	458	529	none	Multidrug efflux pump subunit AcrA
COO91_01673	0.62231	4.51944	18.7253	0.000457931	0.00317938	97	129	125	252	334	309	E3.1.3.25	myo-inositol-1(or 4)-monophosphatase [EC:3.1.3.25]
COO91_06680	0.622156	2.74744	10.4582	0.00488121	0.0211635	39	41	27	82	92	97	none	hypothetical protein
COO91_04540	0.621077	2.97947	7.72111	0.0128748	0.0459923	33	54	35	81	115	114	none	putative membrane protein YozV%2C TM2 domain
COO91_09252	0.620767	4.68338	15.9489	0.000941166	0.00569198	143	137	105	283	355	338	none	Transposase%2C IS4-like
COO91_08835	0.620265	7.08258	24.6917	0.000117119	0.00105642	1022	952	987	2445	2582	2474	mltA	membrane-bound lytic murein transglycosylase A
COO91_11204	0.618916	2.56668	7.94721	0.011826	0.0428825	32	46	36	75	113	102	none	Transposase
COO91_08635	0.618725	4.47417	12.6449	0.00243234	0.0122227	115	80	99	231	277	239	none	Ca2+-binding protein%2C EF-hand superfamily
COO91_02963	0.618701	4.95571	12.1224	0.00285711	0.0137998	108	112	137	224	366	325	E1.2.1.3	aldehyde dehydrogenase (NAD+) [EC:1.2.1.3]
COO91_01279	0.617369	5.21037	11.6826	0.00328005	0.0153961	199	126	182	370	445	478	none	Cytochrome P450
COO91_08125	0.617355	4.93392	10.6694	0.00458655	0.0201644	402	273	322	650	830	1066	minD	cell division inhibitor
COO91_04731	0.615584	3.4639	9.51679	0.0067217	0.0273107	55	72	72	129	212	166	none	Lysophospholipase%2C alpha-beta hydrolase superfamily
COO91_06351	0.614844	3.73568	7.49912	0.0140084	0.0490703	56	91	69	172	203	169	none	Transposase
COO91_07800	0.613322	3.45698	9.00854	0.00803449	0.0315663	57	48	53	100	141	161	ABC.X2.P	putative ABC transport system permease protein
COO91_07838	0.613063	4.68028	8.77977	0.00880617	0.0338247	170	164	138	363	399	427	none	Ribonuclease HI
COO91_08948	0.61154	4.57672	10.6562	0.00457099	0.0201206	163	145	137	304	432	391	none	Glycosyltransferase involved in cell wall bisynthesis
COO91_02449	0.610849	6.10658	22.2311	0.000200074	0.0016582	442	447	413	1030	1077	1168	none	Tetratricopeptide
COO91_02138	0.610621	3.84771	7.55298	0.0137233	0.0482745	90	91	93	232	266	191	none	Glycosyltransferase involved in cell wall bisynthesis
COO91_05883	0.610543	6.82545	19.6051	0.000369083	0.00266864	713	584	638	1534	1751	1595	ndhM	NAD(P)H-quinone oxidoreductase subunit M [EC:1.6.5.3]
COO91_09834	0.608669	4.6572	12.7418	0.00236166	0.0119451	98	124	76	194	284	272	none	hypothetical protein
COO91_00683	0.607737	3.50139	11.4261	0.00355912	0.0164914	77	71	62	150	197	182	DPM1	dolichol-phosphate mannosyltransferase [EC:2.4.1.83]
COO91_03127	0.607428	5.8136	24.9445	0.000111059	0.00101187	279	326	255	654	731	771	none	Transposase
COO91_06741	0.606508	5.32624	17.0036	0.000710485	0.00453412	161	149	149	269	467	429	none	Sugar lactone lactonase YvrE
COO91_09527	0.60596	8.99824	11.1121	0.00468928	0.0205078	1803	1953	1856	4275	4609	5213	none	Large exoprotein involved in heme utilization or adhesion
COO91_00646	0.605777	6.42794	29.8495	4.21451e-05	0.000460321	581	581	587	1322	1560	1518	tamB	translocation and assembly module TamB
COO91_02160	0.601906	4.70037	10.3059	0.00513597	0.0221483	196	175	121	354	408	467	pilG	twitching motility two-component system response regulator PilG
COO91_07318	0.60176	3.3973	8.07139	0.0112913	0.0412477	103	113	94	204	272	303	none	Resolvase%2C HTH domain
COO91_07439	0.601199	4.10552	15.1986	0.00115654	0.00665166	102	100	94	235	269	236	pstS	phosphate transport system substrate-binding protein
COO91_03782	0.600865	5.81856	15.9655	0.000936938	0.00567409	294	280	201	547	772	619	apcC	phycobilisome core linker protein
COO91_07557	0.599523	5.06575	18.6108	0.000471168	0.00325398	141	120	111	259	356	318	nifJ1	pyruvate:flavodoxin oxidoreductase
COO91_09942	0.5989	3.17078	9.14587	0.00765324	0.0304107	38	37	30	91	85	85	none	fdxN element excision controlling factor protein
COO91_09966	0.598004	3.13875	8.89362	0.00837005	0.0325766	39	57	48	97	147	117	none	Glycosaminoglycan attachment site
COO91_11177	0.596554	6.06078	25.2703	0.000103764	0.000955865	318	348	300	707	884	820	none	putative ATPase%2C archaeal AAA+ ATPase superfamily
COO91_10512	0.595978	4.294	16.8594	0.000737911	0.00466808	137	118	110	285	304	320	none	Thymidylate kinase
COO91_08839	0.595879	4.68017	9.54696	0.00665175	0.0270718	90	85	93	202	238	230	none	GAF domain-like
COO91_04832	0.594817	5.9063	27.7698	6.26987e-05	0.000627219	350	318	341	750	896	876	none	Peptidoglycan/xylan/chitin deacetylase%2C PgdA/CDA1 family
COO91_09551	0.594649	4.1776	13.0687	0.00213963	0.0110493	107	157	137	279	378	345	none	DNA primase
COO91_06378	0.594575	2.81543	8.23226	0.0106389	0.0393486	33	49	35	70	122	101	none	Endonuclease%2C Uma2 family
COO91_05954	0.591052	6.06115	15.814	0.000976307	0.00586435	471	470	393	891	1186	1248	none	putative NTPase%2C NACHT family domain
COO91_00694	0.59066	4.32374	8.15558	0.0109444	0.0402522	120	147	130	301	360	325	none	hypothetical protein
COO91_10830	0.590353	4.70113	12.5888	0.00247436	0.0123965	111	133	98	258	296	293	none	Tetratricopeptide
COO91_04802	0.587952	5.36726	14.3359	0.00147553	0.00810719	256	320	202	595	704	618	none	Glycosyltransferase involved in cell wall bisynthesis
COO91_00240	0.586785	4.74231	13.0132	0.00217563	0.0112032	160	118	125	311	336	352	none	hypothetical protein
COO91_09344	0.585976	4.25793	14.1859	0.0015405	0.00837068	83	111	101	195	264	275	none	Mobile element protein
COO91_09371	0.585399	5.76299	13.3605	0.00196119	0.0102402	213	226	215	533	514	567	none	DNA-binding response regulator%2C NarL/FixJ family%2C containings REC and HTH domains
COO91_03733	0.584512	5.58985	16.8157	0.000746462	0.0047112	250	184	210	459	582	560	DPO3A1	DNA polymerase III subunit alpha [EC:2.7.7.7]
COO91_08124	0.583883	5.076	10.2431	0.00524539	0.0225302	380	315	379	694	866	1121	none	cAMP-binding domain of CRP or a regulatory subunit of cAMP-dependent protein kinases
COO91_09216	0.583466	5.13839	12.6339	0.00244051	0.0122523	163	148	155	321	433	404	none	hypothetical protein
COO91_10619	0.583079	5.46748	13.719	0.00176436	0.00938449	232	253	200	504	577	609	none	Large exoprotein involved in heme utilization or adhesion
COO91_09736	0.581212	3.47946	7.60824	0.0134376	0.0475012	42	64	63	143	144	129	none	Type IV secretory pathway%2C VirB4 component
COO91_10097	0.581062	4.59829	14.0395	0.00160709	0.00865859	137	133	103	267	334	319	none	Transposase%2C IS4-like
COO91_07429	0.579877	3.22152	10.6482	0.0045831	0.0201636	44	51	42	99	121	118	none	putative membrane protein
COO91_03569	0.579717	4.54096	12.1167	0.00286225	0.0138123	183	155	164	345	435	464	none	hypothetical protein
COO91_10076	0.579303	6.27398	21.5287	0.000234651	0.00189118	377	428	348	949	835	1039	none	Transposase
COO91_10101	0.57918	5.255	15.3638	0.00110474	0.00644275	246	171	181	461	485	528	loxA	arachidonate 15-lipoxygenase [EC:1.13.11.33]
COO91_09681	0.578959	2.77744	8.08284	0.0112434	0.0411543	38	32	33	70	92	93	none	Site-specific DNA recombinase related to the DNA invertase Pin
COO91_05868	0.578578	5.3414	18.1364	0.000530773	0.0035868	347	365	338	710	1053	836	ubiA	4-hydroxybenzoate polyprenyltransferase [EC:2.5.1.39]
COO91_01471	0.57761	3.91847	11.3673	0.00362678	0.0167262	77	99	76	157	237	229	none	Spore coat polysaccharide biosynthesis protein SpsF%2C cytidylyltransferase family
COO91_10305	0.577562	5.72206	18.5439	0.000479102	0.00329886	284	274	238	588	716	655	none	Site-specific DNA recombinase related to the DNA invertase Pin
COO91_11068	0.577562	5.72206	18.5439	0.000479102	0.00329886	284	274	238	588	716	655	none	Site-specific DNA recombinase related to the DNA invertase Pin
COO91_06461	0.577442	3.33595	7.82023	0.0124025	0.0445552	77	70	59	158	162	186	none	DNA sulfur modification system-associated protein 4
COO91_05974	0.57703	2.28814	7.78591	0.0125638	0.0450448	30	27	28	69	67	73	none	Ketosteroid isomerase
COO91_08197	0.576923	3.08661	8.81743	0.00860127	0.0331908	41	40	37	85	113	93	none	UDP:flavonoid glycosyltransferase YjiC%2C YdhE family
COO91_08090	0.576702	5.47962	15.8222	0.000974138	0.00585456	190	164	188	398	492	449	none	Mobile element protein
COO91_07068	0.576236	6.18983	19.5108	0.000377609	0.00271758	386	420	371	786	1219	903	none	Carbohydrate-selective porin OprB
COO91_08912	0.575923	6.01261	25.9853	8.95565e-05	0.000851759	326	369	302	751	834	861	none	Transposase
COO91_02177	0.57526	2.71584	7.44703	0.0142905	0.0498327	36	28	32	68	87	82	none	Alkylated DNA nucleotide flippase Atl1
COO91_07219	0.574722	5.55177	10.1083	0.00553711	0.0233933	266	207	256	520	628	654	none	hypothetical protein
COO91_00049	0.574677	3.82299	13.3351	0.00197601	0.0103076	85	72	71	169	211	181	none	Armadillo-like helical
COO91_02383	0.57421	4.09395	10.18	0.00535787	0.0228232	131	135	130	289	321	364	none	Triacylglycerol esterase/lipase EstA%2C alpha/beta hydrolase fold
COO91_06824	0.574089	6.67829	14.9282	0.00124732	0.00706933	782	785	719	1712	1992	1909	none	Transposase
COO91_10618	0.573506	4.69347	14.189	0.00153912	0.00837068	137	154	120	291	388	330	none	UDP:flavonoid glycosyltransferase YjiC%2C YdhE family
COO91_04073	0.573386	2.8858	7.7291	0.012836	0.0458688	63	45	56	99	174	134	none	hypothetical protein
COO91_00928	0.572745	4.05986	12.1042	0.00287334	0.0138473	72	100	87	170	223	245	none	Transposase DDE domain
COO91_04280	0.572195	5.52072	14.1546	0.0015545	0.00843406	202	250	247	495	650	576	none	Secreted protein containing bacterial Ig-like domain and vWFA domain
COO91_09244	0.571821	4.91798	17.1098	0.000691015	0.00442146	151	154	129	322	375	366	none	Serine/threonine protein kinase
COO91_00559	0.571171	4.01051	12.7235	0.0023748	0.0119948	103	111	78	226	233	253	none	GAF domain-like
COO91_07130	0.569967	4.43704	15.2578	0.00113767	0.00657455	135	124	134	269	373	326	aphB	phytochrome-like protein, two-component sensor
COO91_09805	0.569569	5.60103	12.0683	0.00290569	0.0139783	103	103	73	208	246	227	none	hypothetical protein
COO91_10622	0.568855	5.32273	19.8111	0.000351182	0.00257278	230	281	226	594	636	564	none	Tetratricopeptide
COO91_03941	0.568704	4.48397	13.766	0.00174026	0.00927405	137	125	142	302	396	294	none	hypothetical protein
COO91_00539	0.568663	5.6188	11.2778	0.0037325	0.0170972	380	442	325	686	1232	903	none	ABC-type bacteriocin/lantibiotic exporters%2C containing an N-terminal double-glycine peptidase domain
COO91_06402	0.567257	3.96469	9.52842	0.00669465	0.027211	70	68	105	175	198	226	E2.7.7.24	glucose-1-phosphate thymidylyltransferase [EC:2.7.7.24]
COO91_00938	0.566784	5.45251	15.2506	0.00113994	0.00658038	188	160	184	390	476	439	none	Harbinger transposase-derived nuclease domain
COO91_00842	0.566774	5.46889	15.2158	0.00115101	0.00662689	221	235	198	539	465	584	none	Transposase
COO91_03138	0.565823	3.90019	8.77954	0.00871893	0.0335611	77	67	51	130	182	165	fadL	long-chain fatty acid transport protein
COO91_09598	0.56576	3.0773	9.5698	0.00659935	0.0269045	48	46	35	91	111	113	none	Chromosome partitioning ATPase%2C Mrp family%2C containings Fe-S cluster
COO91_10303	0.565005	5.52714	12.1642	0.00282028	0.0136654	212	241	196	461	591	532	none	Type II secretory pathway%2C component ExeA
COO91_11070	0.565005	5.52714	12.1642	0.00282028	0.0136654	212	241	196	461	591	532	none	Type II secretory pathway%2C component ExeA
COO91_10921	0.564416	5.04896	12.4878	0.00255212	0.0126716	182	267	168	464	562	470	none	Transposase
COO91_00004	0.563506	6.06637	20.2847	0.000313614	0.00236225	383	334	312	735	940	838	none	Site-specific DNA recombinase
COO91_00053	0.563506	6.06637	20.2847	0.000313614	0.00236225	383	334	312	735	940	838	none	Site-specific DNA recombinase related to the DNA invertase Pin
COO91_00068	0.563506	6.06637	20.2847	0.000313614	0.00236225	383	334	312	735	940	838	none	Site-specific DNA recombinase related to the DNA invertase Pin
COO91_01013	0.563506	6.06637	20.2847	0.000313614	0.00236225	383	334	312	735	940	838	none	Site-specific DNA recombinase related to the DNA invertase Pin
COO91_01178	0.563506	6.06637	20.2847	0.000313614	0.00236225	383	334	312	735	940	838	none	Site-specific DNA recombinase related to the DNA invertase Pin
[truncated: 1,420 more rows]

## Sheet: M2_0h_ctrl_0h
GeneID	logFC	logCPM	F	PValue	FDR	Ctrl_0h_1	Ctrl_0h_2	Ctrl_0h_3	M2_0h_1	M2_0h_2	M2_0h_3	Gene name	Gene description
[truncated: 5,046 more rows]

[truncated: 1 more sheets: M2_3h_ctrl_3h]
